# Supplementary material for: Drought Stress-Related Reprogramming of Gene Expression in Barley Leaves Involves Loading of ABA-Related Genes with Euchromatic Marks H3K4me3 and H3K9ac
Source: Preprints.org preprint supplement (doi:10.20944/preprints202307.1046.v1), 2023-07-17
Supplement: Supplementary file 1 [file supplementary]

## Sheet: Description
Figure S1	Signal tracks of stress response genes labelled with H3K9ac
Table S1	Statistics of the ChIPseq-Mapping
Table S2	List of genes labelled with H3K4me3 in M0
Table S3	List of genes labelled with H3K4me3 in M2
Table S4	List of genes labelled with H3K4me3 in D2
Table S5	List of genes labelled with H3K9ac in M0
Table S6	List of genes labelled with H3K9ac in M2
Table S7	List of genes labelled with H3K9ac in D2
Table S8	List of genes labelled with H3K9ac exclusively in D2 (M0vsM2vsD2)
Table S9	List of genes labelled with H3K4me3 exclusively in D2 (M0vsM2vsD2)
Table S10	GO enrichment analysis of 2008 genes labelled with H3K9ac in D2 (M0vsM2vsD2)
Table S11	UP-regulated genes (D2vsM2)
Table S12	DOWN-regulated genes (D2vsM2)
Table S13	List of PP2Cs associated with H3K9ac in D2
Table S14	Signal tracks of PP2Cs associated with H3K9ac in D2
Table S15	Primer sequences

## Sheet: Table S1 ChIPseq Mapping
Table S1. Mapping statistics from ChIPseq
		M0			M2			D2
Sample	Replicate	Reads	Mapped (non-dup)	Mapping rate (%)	Reads	Mapped (non-dup)	Mapping rate (%)	Reads	Mapped (non-dup)	Mapping rate (%)
Input	1	22098322	21932604	99.2501	24023620	23858401	99.3123	26673886	26475769	99.2573
	2	9183624	9096776	99.0543	7684528	7614454	99.0881	9386624	9285551	98.9232
	3	34828208	33438591	96.0101	38941596	37444644	96.1559	30292424	29693892	98.0242
H3K4me3	1	22853522	21230730	92.8992	24165576	20847529	86.2695	24256014	23660496	97.5449
	2	12232022	11825674	96.678	12910286	11593073	89.7972	10283494	9892678	96.1996
	3	27195518	26009182	95.6378	9914314	9502182	95.8431	38655214	32685390	84.5562
H3K9ac	1	22710986	20749254	91.3622	23205116	20157074	86.8648	25831310	25260949	97.792
	2	9672140	8097125	83.716	13048786	10891894	83.4706	12052420	11401428	94.5987
	3	10976592	10683498	97.3298	11911762	11683477	98.0835	36274874	30086881	82.9414
H3K9me2	1	17376712	16822961	96.8133	19239294	18301090	95.1235	26453710	26001257	98.2896
	2	9803078	9271436	94.5768	9436180	8560180	90.7166	8947726	8131917	90.8825
	3	30014098	28247998	94.1158	30601064	27868514	91.0704	33545198	31053237	92.5713

## Sheet: Table S2 M0 H3K4me3
Table S2. Genes marked with H3K4me3 in M0
HORVU.MOREX.r2.1HG0000020
HORVU.MOREX.r2.1HG0000030
HORVU.MOREX.r2.1HG0000040
HORVU.MOREX.r2.1HG0000080
HORVU.MOREX.r2.1HG0000090
HORVU.MOREX.r2.1HG0000280
HORVU.MOREX.r2.1HG0000290
HORVU.MOREX.r2.1HG0000580
HORVU.MOREX.r2.1HG0000590
HORVU.MOREX.r2.1HG0000640
HORVU.MOREX.r2.1HG0000660
HORVU.MOREX.r2.1HG0000740
HORVU.MOREX.r2.1HG0001140
HORVU.MOREX.r2.1HG0001160
HORVU.MOREX.r2.1HG0001460
HORVU.MOREX.r2.1HG0001540
HORVU.MOREX.r2.1HG0001560
HORVU.MOREX.r2.1HG0001690
HORVU.MOREX.r2.1HG0001710
HORVU.MOREX.r2.1HG0001720
HORVU.MOREX.r2.1HG0001800
HORVU.MOREX.r2.1HG0001830
HORVU.MOREX.r2.1HG0001910
HORVU.MOREX.r2.1HG0001920
HORVU.MOREX.r2.1HG0001940
HORVU.MOREX.r2.1HG0001990
HORVU.MOREX.r2.1HG0002020
HORVU.MOREX.r2.1HG0002030
HORVU.MOREX.r2.1HG0002190
HORVU.MOREX.r2.1HG0002210
HORVU.MOREX.r2.1HG0002230
HORVU.MOREX.r2.1HG0002350
HORVU.MOREX.r2.1HG0002490
HORVU.MOREX.r2.1HG0002640
HORVU.MOREX.r2.1HG0002660
HORVU.MOREX.r2.1HG0002750
HORVU.MOREX.r2.1HG0002770
HORVU.MOREX.r2.1HG0002780
HORVU.MOREX.r2.1HG0002840
HORVU.MOREX.r2.1HG0002850
HORVU.MOREX.r2.1HG0002870
HORVU.MOREX.r2.1HG0003010
HORVU.MOREX.r2.1HG0003040
HORVU.MOREX.r2.1HG0003090
HORVU.MOREX.r2.1HG0003220
HORVU.MOREX.r2.1HG0003270
HORVU.MOREX.r2.1HG0003290
HORVU.MOREX.r2.1HG0003300
HORVU.MOREX.r2.1HG0003310
HORVU.MOREX.r2.1HG0003400
HORVU.MOREX.r2.1HG0003410
HORVU.MOREX.r2.1HG0003480
HORVU.MOREX.r2.1HG0003500
HORVU.MOREX.r2.1HG0003540
HORVU.MOREX.r2.1HG0003610
HORVU.MOREX.r2.1HG0003630
HORVU.MOREX.r2.1HG0003740
HORVU.MOREX.r2.1HG0003770
HORVU.MOREX.r2.1HG0003790
HORVU.MOREX.r2.1HG0003890
HORVU.MOREX.r2.1HG0003900
HORVU.MOREX.r2.1HG0003910
HORVU.MOREX.r2.1HG0003920
HORVU.MOREX.r2.1HG0004050
HORVU.MOREX.r2.1HG0004060
HORVU.MOREX.r2.1HG0004150
HORVU.MOREX.r2.1HG0004200
HORVU.MOREX.r2.1HG0004210
HORVU.MOREX.r2.1HG0004220
HORVU.MOREX.r2.1HG0004230
HORVU.MOREX.r2.1HG0004370
HORVU.MOREX.r2.1HG0004380
HORVU.MOREX.r2.1HG0004420
HORVU.MOREX.r2.1HG0004480
HORVU.MOREX.r2.1HG0004500
HORVU.MOREX.r2.1HG0004550
HORVU.MOREX.r2.1HG0004620
HORVU.MOREX.r2.1HG0004690
HORVU.MOREX.r2.1HG0004810
HORVU.MOREX.r2.1HG0004900
HORVU.MOREX.r2.1HG0004930
HORVU.MOREX.r2.1HG0004940
HORVU.MOREX.r2.1HG0004960
HORVU.MOREX.r2.1HG0005090
HORVU.MOREX.r2.1HG0005300
HORVU.MOREX.r2.1HG0005340
HORVU.MOREX.r2.1HG0005360
HORVU.MOREX.r2.1HG0005380
HORVU.MOREX.r2.1HG0005390
HORVU.MOREX.r2.1HG0005430
HORVU.MOREX.r2.1HG0005440
HORVU.MOREX.r2.1HG0005500
HORVU.MOREX.r2.1HG0005510
HORVU.MOREX.r2.1HG0005570
HORVU.MOREX.r2.1HG0005650
HORVU.MOREX.r2.1HG0005660
HORVU.MOREX.r2.1HG0005850
HORVU.MOREX.r2.1HG0005960
HORVU.MOREX.r2.1HG0006020
HORVU.MOREX.r2.1HG0006100
HORVU.MOREX.r2.1HG0006150
HORVU.MOREX.r2.1HG0006240
HORVU.MOREX.r2.1HG0006250
HORVU.MOREX.r2.1HG0006260
HORVU.MOREX.r2.1HG0006280
HORVU.MOREX.r2.1HG0006290
HORVU.MOREX.r2.1HG0006340
HORVU.MOREX.r2.1HG0006380
HORVU.MOREX.r2.1HG0006420
HORVU.MOREX.r2.1HG0006440
HORVU.MOREX.r2.1HG0006450
HORVU.MOREX.r2.1HG0006570
HORVU.MOREX.r2.1HG0006600
HORVU.MOREX.r2.1HG0006620
HORVU.MOREX.r2.1HG0006660
HORVU.MOREX.r2.1HG0006800
HORVU.MOREX.r2.1HG0006810
HORVU.MOREX.r2.1HG0006820
HORVU.MOREX.r2.1HG0007020
HORVU.MOREX.r2.1HG0007050
HORVU.MOREX.r2.1HG0007060
HORVU.MOREX.r2.1HG0007070
HORVU.MOREX.r2.1HG0007110
HORVU.MOREX.r2.1HG0007130
HORVU.MOREX.r2.1HG0007190
HORVU.MOREX.r2.1HG0007200
HORVU.MOREX.r2.1HG0007220
HORVU.MOREX.r2.1HG0007250
HORVU.MOREX.r2.1HG0007300
HORVU.MOREX.r2.1HG0007410
HORVU.MOREX.r2.1HG0007480
HORVU.MOREX.r2.1HG0007520
HORVU.MOREX.r2.1HG0007540
HORVU.MOREX.r2.1HG0007630
HORVU.MOREX.r2.1HG0007680
HORVU.MOREX.r2.1HG0007760
HORVU.MOREX.r2.1HG0007790
HORVU.MOREX.r2.1HG0007840
HORVU.MOREX.r2.1HG0007850
HORVU.MOREX.r2.1HG0008140
HORVU.MOREX.r2.1HG0008250
HORVU.MOREX.r2.1HG0008330
HORVU.MOREX.r2.1HG0008390
HORVU.MOREX.r2.1HG0008410
HORVU.MOREX.r2.1HG0008430
HORVU.MOREX.r2.1HG0008450
HORVU.MOREX.r2.1HG0008510
HORVU.MOREX.r2.1HG0008570
HORVU.MOREX.r2.1HG0008580
HORVU.MOREX.r2.1HG0008630
HORVU.MOREX.r2.1HG0008650
HORVU.MOREX.r2.1HG0008710
HORVU.MOREX.r2.1HG0008730
HORVU.MOREX.r2.1HG0008760
HORVU.MOREX.r2.1HG0008810
HORVU.MOREX.r2.1HG0008840
HORVU.MOREX.r2.1HG0008850
HORVU.MOREX.r2.1HG0008950
HORVU.MOREX.r2.1HG0008980
HORVU.MOREX.r2.1HG0009050
HORVU.MOREX.r2.1HG0009060
HORVU.MOREX.r2.1HG0009080
HORVU.MOREX.r2.1HG0009110
HORVU.MOREX.r2.1HG0009170
HORVU.MOREX.r2.1HG0009180
HORVU.MOREX.r2.1HG0009200
HORVU.MOREX.r2.1HG0009320
HORVU.MOREX.r2.1HG0009530
HORVU.MOREX.r2.1HG0009540
HORVU.MOREX.r2.1HG0009560
HORVU.MOREX.r2.1HG0009680
HORVU.MOREX.r2.1HG0009710
HORVU.MOREX.r2.1HG0009720
HORVU.MOREX.r2.1HG0009910
HORVU.MOREX.r2.1HG0009940
HORVU.MOREX.r2.1HG0009950
HORVU.MOREX.r2.1HG0010040
HORVU.MOREX.r2.1HG0010050
HORVU.MOREX.r2.1HG0010060
HORVU.MOREX.r2.1HG0010070
HORVU.MOREX.r2.1HG0010080
HORVU.MOREX.r2.1HG0010150
HORVU.MOREX.r2.1HG0010170
HORVU.MOREX.r2.1HG0010390
HORVU.MOREX.r2.1HG0010410
HORVU.MOREX.r2.1HG0010500
HORVU.MOREX.r2.1HG0010520
HORVU.MOREX.r2.1HG0010660
HORVU.MOREX.r2.1HG0010850
HORVU.MOREX.r2.1HG0010970
HORVU.MOREX.r2.1HG0010990
HORVU.MOREX.r2.1HG0011080
HORVU.MOREX.r2.1HG0011090
HORVU.MOREX.r2.1HG0011100
HORVU.MOREX.r2.1HG0011160
HORVU.MOREX.r2.1HG0011180
HORVU.MOREX.r2.1HG0011190
HORVU.MOREX.r2.1HG0011220
HORVU.MOREX.r2.1HG0011230
HORVU.MOREX.r2.1HG0011240
HORVU.MOREX.r2.1HG0011250
HORVU.MOREX.r2.1HG0011400
HORVU.MOREX.r2.1HG0011520
HORVU.MOREX.r2.1HG0011560
HORVU.MOREX.r2.1HG0011720
HORVU.MOREX.r2.1HG0011900
HORVU.MOREX.r2.1HG0011940
HORVU.MOREX.r2.1HG0012070
HORVU.MOREX.r2.1HG0012100
HORVU.MOREX.r2.1HG0012110
HORVU.MOREX.r2.1HG0012120
HORVU.MOREX.r2.1HG0012130
HORVU.MOREX.r2.1HG0012160
HORVU.MOREX.r2.1HG0012220
HORVU.MOREX.r2.1HG0012240
HORVU.MOREX.r2.1HG0012340
HORVU.MOREX.r2.1HG0012450
HORVU.MOREX.r2.1HG0012460
HORVU.MOREX.r2.1HG0012500
HORVU.MOREX.r2.1HG0012520
HORVU.MOREX.r2.1HG0012650
HORVU.MOREX.r2.1HG0012680
HORVU.MOREX.r2.1HG0012780
HORVU.MOREX.r2.1HG0012790
HORVU.MOREX.r2.1HG0012800
HORVU.MOREX.r2.1HG0012840
HORVU.MOREX.r2.1HG0012900
HORVU.MOREX.r2.1HG0012920
HORVU.MOREX.r2.1HG0012930
HORVU.MOREX.r2.1HG0012980
HORVU.MOREX.r2.1HG0012990
HORVU.MOREX.r2.1HG0013040
HORVU.MOREX.r2.1HG0013270
HORVU.MOREX.r2.1HG0013310
HORVU.MOREX.r2.1HG0013370
HORVU.MOREX.r2.1HG0013380
HORVU.MOREX.r2.1HG0013470
HORVU.MOREX.r2.1HG0013530
HORVU.MOREX.r2.1HG0013550
HORVU.MOREX.r2.1HG0013570
HORVU.MOREX.r2.1HG0013580
HORVU.MOREX.r2.1HG0013680
HORVU.MOREX.r2.1HG0013760
HORVU.MOREX.r2.1HG0013780
HORVU.MOREX.r2.1HG0013820
HORVU.MOREX.r2.1HG0013990
HORVU.MOREX.r2.1HG0014060
HORVU.MOREX.r2.1HG0014080
HORVU.MOREX.r2.1HG0014100
HORVU.MOREX.r2.1HG0014110
HORVU.MOREX.r2.1HG0014120
HORVU.MOREX.r2.1HG0014170
HORVU.MOREX.r2.1HG0014190
HORVU.MOREX.r2.1HG0014420
HORVU.MOREX.r2.1HG0014470
HORVU.MOREX.r2.1HG0014490
HORVU.MOREX.r2.1HG0014550
HORVU.MOREX.r2.1HG0014610
HORVU.MOREX.r2.1HG0014630
HORVU.MOREX.r2.1HG0014870
HORVU.MOREX.r2.1HG0015010
HORVU.MOREX.r2.1HG0015020
HORVU.MOREX.r2.1HG0015060
HORVU.MOREX.r2.1HG0015100
HORVU.MOREX.r2.1HG0015120
HORVU.MOREX.r2.1HG0015150
HORVU.MOREX.r2.1HG0015160
HORVU.MOREX.r2.1HG0015170
HORVU.MOREX.r2.1HG0015250
HORVU.MOREX.r2.1HG0015350
HORVU.MOREX.r2.1HG0015580
HORVU.MOREX.r2.1HG0015620
HORVU.MOREX.r2.1HG0015680
HORVU.MOREX.r2.1HG0015720
HORVU.MOREX.r2.1HG0015840
HORVU.MOREX.r2.1HG0015870
HORVU.MOREX.r2.1HG0015920
HORVU.MOREX.r2.1HG0015950
HORVU.MOREX.r2.1HG0016020
HORVU.MOREX.r2.1HG0016060
HORVU.MOREX.r2.1HG0016110
HORVU.MOREX.r2.1HG0016130
HORVU.MOREX.r2.1HG0016200
HORVU.MOREX.r2.1HG0016280
HORVU.MOREX.r2.1HG0016320
HORVU.MOREX.r2.1HG0016340
HORVU.MOREX.r2.1HG0016410
HORVU.MOREX.r2.1HG0016510
HORVU.MOREX.r2.1HG0016520
HORVU.MOREX.r2.1HG0016530
HORVU.MOREX.r2.1HG0016570
HORVU.MOREX.r2.1HG0016640
HORVU.MOREX.r2.1HG0016740
HORVU.MOREX.r2.1HG0016770
HORVU.MOREX.r2.1HG0016780
HORVU.MOREX.r2.1HG0016800
HORVU.MOREX.r2.1HG0016860
HORVU.MOREX.r2.1HG0016900
HORVU.MOREX.r2.1HG0016910
HORVU.MOREX.r2.1HG0017050
HORVU.MOREX.r2.1HG0017110
HORVU.MOREX.r2.1HG0017120
HORVU.MOREX.r2.1HG0017180
HORVU.MOREX.r2.1HG0017310
HORVU.MOREX.r2.1HG0017390
HORVU.MOREX.r2.1HG0017400
HORVU.MOREX.r2.1HG0017490
HORVU.MOREX.r2.1HG0017530
HORVU.MOREX.r2.1HG0017670
HORVU.MOREX.r2.1HG0017750
HORVU.MOREX.r2.1HG0017810
HORVU.MOREX.r2.1HG0017860
HORVU.MOREX.r2.1HG0017920
HORVU.MOREX.r2.1HG0017930
HORVU.MOREX.r2.1HG0017990
HORVU.MOREX.r2.1HG0018080
HORVU.MOREX.r2.1HG0018170
HORVU.MOREX.r2.1HG0018210
HORVU.MOREX.r2.1HG0018290
HORVU.MOREX.r2.1HG0018310
HORVU.MOREX.r2.1HG0018430
HORVU.MOREX.r2.1HG0018480
HORVU.MOREX.r2.1HG0018560
HORVU.MOREX.r2.1HG0018580
HORVU.MOREX.r2.1HG0018630
HORVU.MOREX.r2.1HG0018640
HORVU.MOREX.r2.1HG0018700
HORVU.MOREX.r2.1HG0018740
HORVU.MOREX.r2.1HG0018780
HORVU.MOREX.r2.1HG0018800
HORVU.MOREX.r2.1HG0018830
HORVU.MOREX.r2.1HG0018850
HORVU.MOREX.r2.1HG0018860
HORVU.MOREX.r2.1HG0018900
HORVU.MOREX.r2.1HG0018910
HORVU.MOREX.r2.1HG0018950
HORVU.MOREX.r2.1HG0018960
HORVU.MOREX.r2.1HG0018970
HORVU.MOREX.r2.1HG0019030
HORVU.MOREX.r2.1HG0019090
HORVU.MOREX.r2.1HG0019100
HORVU.MOREX.r2.1HG0019120
HORVU.MOREX.r2.1HG0019150
HORVU.MOREX.r2.1HG0019210
HORVU.MOREX.r2.1HG0019270
HORVU.MOREX.r2.1HG0019280
HORVU.MOREX.r2.1HG0019310
HORVU.MOREX.r2.1HG0019450
HORVU.MOREX.r2.1HG0019510
HORVU.MOREX.r2.1HG0019560
HORVU.MOREX.r2.1HG0019660
HORVU.MOREX.r2.1HG0019680
HORVU.MOREX.r2.1HG0019780
HORVU.MOREX.r2.1HG0019790
HORVU.MOREX.r2.1HG0019900
HORVU.MOREX.r2.1HG0020140
HORVU.MOREX.r2.1HG0020250
HORVU.MOREX.r2.1HG0020280
HORVU.MOREX.r2.1HG0020310
HORVU.MOREX.r2.1HG0020320
HORVU.MOREX.r2.1HG0020410
HORVU.MOREX.r2.1HG0020430
HORVU.MOREX.r2.1HG0020470
HORVU.MOREX.r2.1HG0020530
HORVU.MOREX.r2.1HG0020540
HORVU.MOREX.r2.1HG0020610
HORVU.MOREX.r2.1HG0020680
HORVU.MOREX.r2.1HG0020700
HORVU.MOREX.r2.1HG0020750
HORVU.MOREX.r2.1HG0020770
HORVU.MOREX.r2.1HG0020800
HORVU.MOREX.r2.1HG0020910
HORVU.MOREX.r2.1HG0020990
HORVU.MOREX.r2.1HG0021270
HORVU.MOREX.r2.1HG0021280
HORVU.MOREX.r2.1HG0021310
HORVU.MOREX.r2.1HG0021320
HORVU.MOREX.r2.1HG0021340
HORVU.MOREX.r2.1HG0021370
HORVU.MOREX.r2.1HG0021410
HORVU.MOREX.r2.1HG0021430
HORVU.MOREX.r2.1HG0021490
HORVU.MOREX.r2.1HG0021500
HORVU.MOREX.r2.1HG0021540
HORVU.MOREX.r2.1HG0021570
HORVU.MOREX.r2.1HG0021590
HORVU.MOREX.r2.1HG0021680
HORVU.MOREX.r2.1HG0021700
HORVU.MOREX.r2.1HG0021740
HORVU.MOREX.r2.1HG0021770
HORVU.MOREX.r2.1HG0021810
HORVU.MOREX.r2.1HG0021820
HORVU.MOREX.r2.1HG0021840
HORVU.MOREX.r2.1HG0021870
HORVU.MOREX.r2.1HG0021890
HORVU.MOREX.r2.1HG0021920
HORVU.MOREX.r2.1HG0021930
HORVU.MOREX.r2.1HG0021970
HORVU.MOREX.r2.1HG0021990
HORVU.MOREX.r2.1HG0022010
HORVU.MOREX.r2.1HG0022050
HORVU.MOREX.r2.1HG0022070
HORVU.MOREX.r2.1HG0022090
HORVU.MOREX.r2.1HG0022120
HORVU.MOREX.r2.1HG0022310
HORVU.MOREX.r2.1HG0022330
HORVU.MOREX.r2.1HG0022960
HORVU.MOREX.r2.1HG0022970
HORVU.MOREX.r2.1HG0022990
HORVU.MOREX.r2.1HG0023130
HORVU.MOREX.r2.1HG0023170
HORVU.MOREX.r2.1HG0023280
HORVU.MOREX.r2.1HG0023330
HORVU.MOREX.r2.1HG0023410
HORVU.MOREX.r2.1HG0023480
HORVU.MOREX.r2.1HG0023530
HORVU.MOREX.r2.1HG0023540
HORVU.MOREX.r2.1HG0023650
HORVU.MOREX.r2.1HG0023750
HORVU.MOREX.r2.1HG0023790
HORVU.MOREX.r2.1HG0023830
HORVU.MOREX.r2.1HG0023880
HORVU.MOREX.r2.1HG0023940
HORVU.MOREX.r2.1HG0023950
HORVU.MOREX.r2.1HG0024060
HORVU.MOREX.r2.1HG0024080
HORVU.MOREX.r2.1HG0024120
HORVU.MOREX.r2.1HG0024140
HORVU.MOREX.r2.1HG0024500
HORVU.MOREX.r2.1HG0024540
HORVU.MOREX.r2.1HG0024590
HORVU.MOREX.r2.1HG0024620
HORVU.MOREX.r2.1HG0024660
HORVU.MOREX.r2.1HG0024940
HORVU.MOREX.r2.1HG0025060
HORVU.MOREX.r2.1HG0025150
HORVU.MOREX.r2.1HG0025240
HORVU.MOREX.r2.1HG0025250
HORVU.MOREX.r2.1HG0025280
HORVU.MOREX.r2.1HG0025300
HORVU.MOREX.r2.1HG0025320
HORVU.MOREX.r2.1HG0025340
HORVU.MOREX.r2.1HG0025620
HORVU.MOREX.r2.1HG0025820
HORVU.MOREX.r2.1HG0025840
HORVU.MOREX.r2.1HG0025850
HORVU.MOREX.r2.1HG0025890
HORVU.MOREX.r2.1HG0026180
HORVU.MOREX.r2.1HG0026230
HORVU.MOREX.r2.1HG0026290
HORVU.MOREX.r2.1HG0026410
HORVU.MOREX.r2.1HG0026430
HORVU.MOREX.r2.1HG0026470
HORVU.MOREX.r2.1HG0026490
HORVU.MOREX.r2.1HG0026520
HORVU.MOREX.r2.1HG0026590
HORVU.MOREX.r2.1HG0026700
HORVU.MOREX.r2.1HG0026750
HORVU.MOREX.r2.1HG0026790
HORVU.MOREX.r2.1HG0026820
HORVU.MOREX.r2.1HG0026900
HORVU.MOREX.r2.1HG0026930
HORVU.MOREX.r2.1HG0026950
HORVU.MOREX.r2.1HG0027030
HORVU.MOREX.r2.1HG0027120
HORVU.MOREX.r2.1HG0027260
HORVU.MOREX.r2.1HG0027280
HORVU.MOREX.r2.1HG0027380
HORVU.MOREX.r2.1HG0027480
HORVU.MOREX.r2.1HG0027640
HORVU.MOREX.r2.1HG0027750
HORVU.MOREX.r2.1HG0028090
HORVU.MOREX.r2.1HG0028170
HORVU.MOREX.r2.1HG0028200
HORVU.MOREX.r2.1HG0028230
HORVU.MOREX.r2.1HG0028340
HORVU.MOREX.r2.1HG0028440
HORVU.MOREX.r2.1HG0028560
HORVU.MOREX.r2.1HG0028570
HORVU.MOREX.r2.1HG0028590
HORVU.MOREX.r2.1HG0028630
HORVU.MOREX.r2.1HG0028650
HORVU.MOREX.r2.1HG0028710
HORVU.MOREX.r2.1HG0028720
HORVU.MOREX.r2.1HG0028770
HORVU.MOREX.r2.1HG0028790
HORVU.MOREX.r2.1HG0029110
HORVU.MOREX.r2.1HG0029160
HORVU.MOREX.r2.1HG0029240
HORVU.MOREX.r2.1HG0029360
HORVU.MOREX.r2.1HG0029410
HORVU.MOREX.r2.1HG0029420
HORVU.MOREX.r2.1HG0029450
HORVU.MOREX.r2.1HG0029460
HORVU.MOREX.r2.1HG0029500
HORVU.MOREX.r2.1HG0029540
HORVU.MOREX.r2.1HG0029910
HORVU.MOREX.r2.1HG0029920
HORVU.MOREX.r2.1HG0029940
HORVU.MOREX.r2.1HG0029970
HORVU.MOREX.r2.1HG0030070
HORVU.MOREX.r2.1HG0030100
HORVU.MOREX.r2.1HG0030150
HORVU.MOREX.r2.1HG0030160
HORVU.MOREX.r2.1HG0030180
HORVU.MOREX.r2.1HG0030190
HORVU.MOREX.r2.1HG0030210
HORVU.MOREX.r2.1HG0030220
HORVU.MOREX.r2.1HG0030230
HORVU.MOREX.r2.1HG0030250
HORVU.MOREX.r2.1HG0030270
HORVU.MOREX.r2.1HG0030300
HORVU.MOREX.r2.1HG0030350
HORVU.MOREX.r2.1HG0030360
HORVU.MOREX.r2.1HG0030460
HORVU.MOREX.r2.1HG0030470
HORVU.MOREX.r2.1HG0030490
HORVU.MOREX.r2.1HG0030920
HORVU.MOREX.r2.1HG0030940
HORVU.MOREX.r2.1HG0030970
HORVU.MOREX.r2.1HG0031000
HORVU.MOREX.r2.1HG0031030
HORVU.MOREX.r2.1HG0031080
HORVU.MOREX.r2.1HG0031180
HORVU.MOREX.r2.1HG0031450
HORVU.MOREX.r2.1HG0031470
HORVU.MOREX.r2.1HG0031490
HORVU.MOREX.r2.1HG0031510
HORVU.MOREX.r2.1HG0031580
HORVU.MOREX.r2.1HG0031690
HORVU.MOREX.r2.1HG0031760
HORVU.MOREX.r2.1HG0031790
HORVU.MOREX.r2.1HG0031860
HORVU.MOREX.r2.1HG0031880
HORVU.MOREX.r2.1HG0031900
HORVU.MOREX.r2.1HG0031930
HORVU.MOREX.r2.1HG0031940
HORVU.MOREX.r2.1HG0031950
HORVU.MOREX.r2.1HG0031960
HORVU.MOREX.r2.1HG0031970
HORVU.MOREX.r2.1HG0031990
HORVU.MOREX.r2.1HG0032060
HORVU.MOREX.r2.1HG0032070
HORVU.MOREX.r2.1HG0032080
HORVU.MOREX.r2.1HG0032090
HORVU.MOREX.r2.1HG0032330
HORVU.MOREX.r2.1HG0032340
HORVU.MOREX.r2.1HG0032390
HORVU.MOREX.r2.1HG0032420
HORVU.MOREX.r2.1HG0032440
HORVU.MOREX.r2.1HG0032520
HORVU.MOREX.r2.1HG0032590
HORVU.MOREX.r2.1HG0032660
HORVU.MOREX.r2.1HG0032670
HORVU.MOREX.r2.1HG0032680
HORVU.MOREX.r2.1HG0032830
HORVU.MOREX.r2.1HG0032850
HORVU.MOREX.r2.1HG0032940
HORVU.MOREX.r2.1HG0033090
HORVU.MOREX.r2.1HG0033100
HORVU.MOREX.r2.1HG0033150
HORVU.MOREX.r2.1HG0033270
HORVU.MOREX.r2.1HG0033340
HORVU.MOREX.r2.1HG0033380
HORVU.MOREX.r2.1HG0033390
HORVU.MOREX.r2.1HG0033460
HORVU.MOREX.r2.1HG0033510
HORVU.MOREX.r2.1HG0033530
HORVU.MOREX.r2.1HG0033550
HORVU.MOREX.r2.1HG0033580
HORVU.MOREX.r2.1HG0033610
HORVU.MOREX.r2.1HG0033640
HORVU.MOREX.r2.1HG0033690
HORVU.MOREX.r2.1HG0033710
HORVU.MOREX.r2.1HG0033750
HORVU.MOREX.r2.1HG0033800
HORVU.MOREX.r2.1HG0033810
HORVU.MOREX.r2.1HG0033830
HORVU.MOREX.r2.1HG0033860
HORVU.MOREX.r2.1HG0033880
HORVU.MOREX.r2.1HG0033970
HORVU.MOREX.r2.1HG0034150
HORVU.MOREX.r2.1HG0034160
HORVU.MOREX.r2.1HG0034220
HORVU.MOREX.r2.1HG0034250
HORVU.MOREX.r2.1HG0034280
HORVU.MOREX.r2.1HG0034530
HORVU.MOREX.r2.1HG0034630
HORVU.MOREX.r2.1HG0034700
HORVU.MOREX.r2.1HG0034740
HORVU.MOREX.r2.1HG0034750
HORVU.MOREX.r2.1HG0034790
HORVU.MOREX.r2.1HG0034800
HORVU.MOREX.r2.1HG0034980
HORVU.MOREX.r2.1HG0034990
HORVU.MOREX.r2.1HG0035040
HORVU.MOREX.r2.1HG0035050
HORVU.MOREX.r2.1HG0035250
HORVU.MOREX.r2.1HG0035260
HORVU.MOREX.r2.1HG0035290
HORVU.MOREX.r2.1HG0035340
HORVU.MOREX.r2.1HG0035360
HORVU.MOREX.r2.1HG0035490
HORVU.MOREX.r2.1HG0035540
HORVU.MOREX.r2.1HG0035560
HORVU.MOREX.r2.1HG0035590
HORVU.MOREX.r2.1HG0035670
HORVU.MOREX.r2.1HG0035690
HORVU.MOREX.r2.1HG0035720
HORVU.MOREX.r2.1HG0035800
HORVU.MOREX.r2.1HG0035920
HORVU.MOREX.r2.1HG0035950
HORVU.MOREX.r2.1HG0036000
HORVU.MOREX.r2.1HG0036020
HORVU.MOREX.r2.1HG0036060
HORVU.MOREX.r2.1HG0036070
HORVU.MOREX.r2.1HG0036120
HORVU.MOREX.r2.1HG0036140
HORVU.MOREX.r2.1HG0036150
HORVU.MOREX.r2.1HG0036160
HORVU.MOREX.r2.1HG0036210
HORVU.MOREX.r2.1HG0036230
HORVU.MOREX.r2.1HG0036260
HORVU.MOREX.r2.1HG0036330
HORVU.MOREX.r2.1HG0036360
HORVU.MOREX.r2.1HG0036380
HORVU.MOREX.r2.1HG0036440
HORVU.MOREX.r2.1HG0036500
HORVU.MOREX.r2.1HG0036710
HORVU.MOREX.r2.1HG0036740
HORVU.MOREX.r2.1HG0036750
HORVU.MOREX.r2.1HG0036810
HORVU.MOREX.r2.1HG0036820
HORVU.MOREX.r2.1HG0036860
HORVU.MOREX.r2.1HG0036910
HORVU.MOREX.r2.1HG0036980
HORVU.MOREX.r2.1HG0036990
HORVU.MOREX.r2.1HG0037040
HORVU.MOREX.r2.1HG0037050
HORVU.MOREX.r2.1HG0037070
HORVU.MOREX.r2.1HG0037100
HORVU.MOREX.r2.1HG0037110
HORVU.MOREX.r2.1HG0037120
HORVU.MOREX.r2.1HG0037130
HORVU.MOREX.r2.1HG0037190
HORVU.MOREX.r2.1HG0037240
HORVU.MOREX.r2.1HG0037280
HORVU.MOREX.r2.1HG0037320
HORVU.MOREX.r2.1HG0037330
HORVU.MOREX.r2.1HG0037360
HORVU.MOREX.r2.1HG0037520
HORVU.MOREX.r2.1HG0037530
HORVU.MOREX.r2.1HG0037610
HORVU.MOREX.r2.1HG0037640
HORVU.MOREX.r2.1HG0037750
HORVU.MOREX.r2.1HG0037760
HORVU.MOREX.r2.1HG0037790
HORVU.MOREX.r2.1HG0037990
HORVU.MOREX.r2.1HG0038050
HORVU.MOREX.r2.1HG0038230
HORVU.MOREX.r2.1HG0038240
HORVU.MOREX.r2.1HG0038260
HORVU.MOREX.r2.1HG0038310
HORVU.MOREX.r2.1HG0038340
HORVU.MOREX.r2.1HG0038400
HORVU.MOREX.r2.1HG0038570
HORVU.MOREX.r2.1HG0038580
HORVU.MOREX.r2.1HG0038600
HORVU.MOREX.r2.1HG0038630
HORVU.MOREX.r2.1HG0038710
HORVU.MOREX.r2.1HG0038720
HORVU.MOREX.r2.1HG0038730
HORVU.MOREX.r2.1HG0038750
HORVU.MOREX.r2.1HG0038760
HORVU.MOREX.r2.1HG0038790
HORVU.MOREX.r2.1HG0038930
HORVU.MOREX.r2.1HG0038950
HORVU.MOREX.r2.1HG0038960
HORVU.MOREX.r2.1HG0038980
HORVU.MOREX.r2.1HG0039050
HORVU.MOREX.r2.1HG0039060
HORVU.MOREX.r2.1HG0039110
HORVU.MOREX.r2.1HG0039170
HORVU.MOREX.r2.1HG0039190
HORVU.MOREX.r2.1HG0039290
HORVU.MOREX.r2.1HG0039520
HORVU.MOREX.r2.1HG0039540
HORVU.MOREX.r2.1HG0039580
HORVU.MOREX.r2.1HG0039600
HORVU.MOREX.r2.1HG0039690
HORVU.MOREX.r2.1HG0039730
HORVU.MOREX.r2.1HG0039830
HORVU.MOREX.r2.1HG0039850
HORVU.MOREX.r2.1HG0039920
HORVU.MOREX.r2.1HG0039970
HORVU.MOREX.r2.1HG0040060
HORVU.MOREX.r2.1HG0040070
HORVU.MOREX.r2.1HG0040100
HORVU.MOREX.r2.1HG0040130
HORVU.MOREX.r2.1HG0040290
HORVU.MOREX.r2.1HG0040300
HORVU.MOREX.r2.1HG0040330
HORVU.MOREX.r2.1HG0040400
HORVU.MOREX.r2.1HG0040420
HORVU.MOREX.r2.1HG0040480
HORVU.MOREX.r2.1HG0040490
HORVU.MOREX.r2.1HG0040510
HORVU.MOREX.r2.1HG0040530
HORVU.MOREX.r2.1HG0040550
HORVU.MOREX.r2.1HG0040620
HORVU.MOREX.r2.1HG0040640
HORVU.MOREX.r2.1HG0040650
HORVU.MOREX.r2.1HG0040660
HORVU.MOREX.r2.1HG0040680
HORVU.MOREX.r2.1HG0040700
HORVU.MOREX.r2.1HG0040710
HORVU.MOREX.r2.1HG0040730
HORVU.MOREX.r2.1HG0040810
HORVU.MOREX.r2.1HG0040840
HORVU.MOREX.r2.1HG0040850
HORVU.MOREX.r2.1HG0040860
HORVU.MOREX.r2.1HG0040870
HORVU.MOREX.r2.1HG0040930
HORVU.MOREX.r2.1HG0040940
HORVU.MOREX.r2.1HG0040950
HORVU.MOREX.r2.1HG0040990
HORVU.MOREX.r2.1HG0041030
HORVU.MOREX.r2.1HG0041130
HORVU.MOREX.r2.1HG0041270
HORVU.MOREX.r2.1HG0041280
HORVU.MOREX.r2.1HG0041290
HORVU.MOREX.r2.1HG0041310
HORVU.MOREX.r2.1HG0041360
HORVU.MOREX.r2.1HG0041440
HORVU.MOREX.r2.1HG0041590
HORVU.MOREX.r2.1HG0041600
HORVU.MOREX.r2.1HG0041620
HORVU.MOREX.r2.1HG0041650
HORVU.MOREX.r2.1HG0041680
HORVU.MOREX.r2.1HG0041730
HORVU.MOREX.r2.1HG0041740
HORVU.MOREX.r2.1HG0041760
HORVU.MOREX.r2.1HG0041820
HORVU.MOREX.r2.1HG0041850
HORVU.MOREX.r2.1HG0041940
HORVU.MOREX.r2.1HG0041990
HORVU.MOREX.r2.1HG0042000
HORVU.MOREX.r2.1HG0042090
HORVU.MOREX.r2.1HG0042120
HORVU.MOREX.r2.1HG0042170
HORVU.MOREX.r2.1HG0042200
HORVU.MOREX.r2.1HG0042220
HORVU.MOREX.r2.1HG0042230
HORVU.MOREX.r2.1HG0042240
HORVU.MOREX.r2.1HG0042250
HORVU.MOREX.r2.1HG0042280
HORVU.MOREX.r2.1HG0042300
HORVU.MOREX.r2.1HG0042330
HORVU.MOREX.r2.1HG0042340
HORVU.MOREX.r2.1HG0042360
HORVU.MOREX.r2.1HG0042470
HORVU.MOREX.r2.1HG0042480
HORVU.MOREX.r2.1HG0042490
HORVU.MOREX.r2.1HG0042540
HORVU.MOREX.r2.1HG0042550
HORVU.MOREX.r2.1HG0042580
HORVU.MOREX.r2.1HG0042660
HORVU.MOREX.r2.1HG0042700
HORVU.MOREX.r2.1HG0042750
HORVU.MOREX.r2.1HG0042770
HORVU.MOREX.r2.1HG0042810
HORVU.MOREX.r2.1HG0042830
HORVU.MOREX.r2.1HG0042850
HORVU.MOREX.r2.1HG0042930
HORVU.MOREX.r2.1HG0043040
HORVU.MOREX.r2.1HG0043060
HORVU.MOREX.r2.1HG0043070
HORVU.MOREX.r2.1HG0043100
HORVU.MOREX.r2.1HG0043190
HORVU.MOREX.r2.1HG0043200
HORVU.MOREX.r2.1HG0043260
HORVU.MOREX.r2.1HG0043280
HORVU.MOREX.r2.1HG0043460
HORVU.MOREX.r2.1HG0043480
HORVU.MOREX.r2.1HG0043550
HORVU.MOREX.r2.1HG0043580
HORVU.MOREX.r2.1HG0043590
HORVU.MOREX.r2.1HG0043620
HORVU.MOREX.r2.1HG0043640
HORVU.MOREX.r2.1HG0043650
HORVU.MOREX.r2.1HG0043660
HORVU.MOREX.r2.1HG0043680
HORVU.MOREX.r2.1HG0043710
HORVU.MOREX.r2.1HG0043720
HORVU.MOREX.r2.1HG0043730
HORVU.MOREX.r2.1HG0043750
HORVU.MOREX.r2.1HG0043780
HORVU.MOREX.r2.1HG0043800
HORVU.MOREX.r2.1HG0043830
HORVU.MOREX.r2.1HG0043920
HORVU.MOREX.r2.1HG0043930
HORVU.MOREX.r2.1HG0043940
HORVU.MOREX.r2.1HG0043950
HORVU.MOREX.r2.1HG0044040
HORVU.MOREX.r2.1HG0044090
HORVU.MOREX.r2.1HG0044100
HORVU.MOREX.r2.1HG0044190
HORVU.MOREX.r2.1HG0044400
HORVU.MOREX.r2.1HG0044430
HORVU.MOREX.r2.1HG0044440
HORVU.MOREX.r2.1HG0044450
HORVU.MOREX.r2.1HG0044460
HORVU.MOREX.r2.1HG0044480
HORVU.MOREX.r2.1HG0044540
HORVU.MOREX.r2.1HG0044560
HORVU.MOREX.r2.1HG0044600
HORVU.MOREX.r2.1HG0044640
HORVU.MOREX.r2.1HG0044730
HORVU.MOREX.r2.1HG0044770
HORVU.MOREX.r2.1HG0044800
HORVU.MOREX.r2.1HG0044820
HORVU.MOREX.r2.1HG0044900
HORVU.MOREX.r2.1HG0044970
HORVU.MOREX.r2.1HG0045220
HORVU.MOREX.r2.1HG0045240
HORVU.MOREX.r2.1HG0045410
HORVU.MOREX.r2.1HG0045440
HORVU.MOREX.r2.1HG0045450
HORVU.MOREX.r2.1HG0045470
HORVU.MOREX.r2.1HG0045500
HORVU.MOREX.r2.1HG0045530
HORVU.MOREX.r2.1HG0045540
HORVU.MOREX.r2.1HG0045610
HORVU.MOREX.r2.1HG0045620
HORVU.MOREX.r2.1HG0045730
HORVU.MOREX.r2.1HG0045750
HORVU.MOREX.r2.1HG0045760
HORVU.MOREX.r2.1HG0045800
HORVU.MOREX.r2.1HG0045810
HORVU.MOREX.r2.1HG0045820
HORVU.MOREX.r2.1HG0045850
HORVU.MOREX.r2.1HG0045870
HORVU.MOREX.r2.1HG0045890
HORVU.MOREX.r2.1HG0045910
HORVU.MOREX.r2.1HG0045960
HORVU.MOREX.r2.1HG0045990
HORVU.MOREX.r2.1HG0046050
HORVU.MOREX.r2.1HG0046060
HORVU.MOREX.r2.1HG0046140
HORVU.MOREX.r2.1HG0046150
HORVU.MOREX.r2.1HG0046160
HORVU.MOREX.r2.1HG0046180
HORVU.MOREX.r2.1HG0046190
HORVU.MOREX.r2.1HG0046210
HORVU.MOREX.r2.1HG0046260
HORVU.MOREX.r2.1HG0046270
HORVU.MOREX.r2.1HG0046350
HORVU.MOREX.r2.1HG0046370
HORVU.MOREX.r2.1HG0046470
HORVU.MOREX.r2.1HG0046510
HORVU.MOREX.r2.1HG0046540
HORVU.MOREX.r2.1HG0046640
HORVU.MOREX.r2.1HG0046700
HORVU.MOREX.r2.1HG0046710
HORVU.MOREX.r2.1HG0046720
HORVU.MOREX.r2.1HG0046790
HORVU.MOREX.r2.1HG0046800
HORVU.MOREX.r2.1HG0046820
HORVU.MOREX.r2.1HG0046830
HORVU.MOREX.r2.1HG0046850
HORVU.MOREX.r2.1HG0046880
HORVU.MOREX.r2.1HG0046900
HORVU.MOREX.r2.1HG0046990
HORVU.MOREX.r2.1HG0047000
HORVU.MOREX.r2.1HG0047040
HORVU.MOREX.r2.1HG0047050
HORVU.MOREX.r2.1HG0047060
HORVU.MOREX.r2.1HG0047070
HORVU.MOREX.r2.1HG0047090
HORVU.MOREX.r2.1HG0047110
HORVU.MOREX.r2.1HG0047120
HORVU.MOREX.r2.1HG0047130
HORVU.MOREX.r2.1HG0047170
HORVU.MOREX.r2.1HG0047240
HORVU.MOREX.r2.1HG0047440
HORVU.MOREX.r2.1HG0047460
HORVU.MOREX.r2.1HG0047520
HORVU.MOREX.r2.1HG0047540
HORVU.MOREX.r2.1HG0047580
HORVU.MOREX.r2.1HG0047590
HORVU.MOREX.r2.1HG0047610
HORVU.MOREX.r2.1HG0047650
HORVU.MOREX.r2.1HG0047690
HORVU.MOREX.r2.1HG0047810
HORVU.MOREX.r2.1HG0047820
HORVU.MOREX.r2.1HG0047830
HORVU.MOREX.r2.1HG0047940
HORVU.MOREX.r2.1HG0047960
HORVU.MOREX.r2.1HG0047970
HORVU.MOREX.r2.1HG0048070
HORVU.MOREX.r2.1HG0048240
HORVU.MOREX.r2.1HG0048290
HORVU.MOREX.r2.1HG0048300
HORVU.MOREX.r2.1HG0048510
HORVU.MOREX.r2.1HG0048520
HORVU.MOREX.r2.1HG0048530
HORVU.MOREX.r2.1HG0048540
HORVU.MOREX.r2.1HG0048580
HORVU.MOREX.r2.1HG0048610
HORVU.MOREX.r2.1HG0048630
HORVU.MOREX.r2.1HG0048700
HORVU.MOREX.r2.1HG0048780
HORVU.MOREX.r2.1HG0048850
HORVU.MOREX.r2.1HG0048860
HORVU.MOREX.r2.1HG0048980
HORVU.MOREX.r2.1HG0049020
HORVU.MOREX.r2.1HG0049060
HORVU.MOREX.r2.1HG0049150
HORVU.MOREX.r2.1HG0049170
HORVU.MOREX.r2.1HG0049200
HORVU.MOREX.r2.1HG0049280
HORVU.MOREX.r2.1HG0049310
HORVU.MOREX.r2.1HG0049350
HORVU.MOREX.r2.1HG0049370
HORVU.MOREX.r2.1HG0049440
HORVU.MOREX.r2.1HG0049480
HORVU.MOREX.r2.1HG0049530
HORVU.MOREX.r2.1HG0049570
HORVU.MOREX.r2.1HG0049640
HORVU.MOREX.r2.1HG0049650
HORVU.MOREX.r2.1HG0049660
HORVU.MOREX.r2.1HG0049710
HORVU.MOREX.r2.1HG0049750
HORVU.MOREX.r2.1HG0049770
HORVU.MOREX.r2.1HG0049810
HORVU.MOREX.r2.1HG0049870
HORVU.MOREX.r2.1HG0049880
HORVU.MOREX.r2.1HG0049900
HORVU.MOREX.r2.1HG0049940
HORVU.MOREX.r2.1HG0049950
HORVU.MOREX.r2.1HG0049960
HORVU.MOREX.r2.1HG0050000
HORVU.MOREX.r2.1HG0050020
HORVU.MOREX.r2.1HG0050040
HORVU.MOREX.r2.1HG0050060
HORVU.MOREX.r2.1HG0050080
HORVU.MOREX.r2.1HG0050100
HORVU.MOREX.r2.1HG0050130
HORVU.MOREX.r2.1HG0050150
HORVU.MOREX.r2.1HG0050270
HORVU.MOREX.r2.1HG0050340
HORVU.MOREX.r2.1HG0050410
HORVU.MOREX.r2.1HG0050420
HORVU.MOREX.r2.1HG0050430
HORVU.MOREX.r2.1HG0050460
HORVU.MOREX.r2.1HG0050480
HORVU.MOREX.r2.1HG0050500
HORVU.MOREX.r2.1HG0050510
HORVU.MOREX.r2.1HG0050550
HORVU.MOREX.r2.1HG0050580
HORVU.MOREX.r2.1HG0050610
HORVU.MOREX.r2.1HG0050780
HORVU.MOREX.r2.1HG0050790
HORVU.MOREX.r2.1HG0050800
HORVU.MOREX.r2.1HG0050840
HORVU.MOREX.r2.1HG0050900
HORVU.MOREX.r2.1HG0050980
HORVU.MOREX.r2.1HG0050990
HORVU.MOREX.r2.1HG0051000
HORVU.MOREX.r2.1HG0051010
HORVU.MOREX.r2.1HG0051020
HORVU.MOREX.r2.1HG0051030
HORVU.MOREX.r2.1HG0051040
HORVU.MOREX.r2.1HG0051060
HORVU.MOREX.r2.1HG0051080
HORVU.MOREX.r2.1HG0051140
HORVU.MOREX.r2.1HG0051160
HORVU.MOREX.r2.1HG0051280
HORVU.MOREX.r2.1HG0051320
HORVU.MOREX.r2.1HG0051410
HORVU.MOREX.r2.1HG0051440
HORVU.MOREX.r2.1HG0051490
HORVU.MOREX.r2.1HG0051500
HORVU.MOREX.r2.1HG0051570
HORVU.MOREX.r2.1HG0051600
HORVU.MOREX.r2.1HG0051620
HORVU.MOREX.r2.1HG0051630
HORVU.MOREX.r2.1HG0051640
HORVU.MOREX.r2.1HG0051650
HORVU.MOREX.r2.1HG0051660
HORVU.MOREX.r2.1HG0051710
HORVU.MOREX.r2.1HG0051720
HORVU.MOREX.r2.1HG0051740
HORVU.MOREX.r2.1HG0051790
HORVU.MOREX.r2.1HG0051860
HORVU.MOREX.r2.1HG0051890
HORVU.MOREX.r2.1HG0051920
HORVU.MOREX.r2.1HG0051940
HORVU.MOREX.r2.1HG0051950
HORVU.MOREX.r2.1HG0052200
HORVU.MOREX.r2.1HG0052220
HORVU.MOREX.r2.1HG0052290
HORVU.MOREX.r2.1HG0052300
HORVU.MOREX.r2.1HG0052310
HORVU.MOREX.r2.1HG0052330
HORVU.MOREX.r2.1HG0052350
HORVU.MOREX.r2.1HG0052400
HORVU.MOREX.r2.1HG0052410
HORVU.MOREX.r2.1HG0052500
HORVU.MOREX.r2.1HG0052510
HORVU.MOREX.r2.1HG0052560
HORVU.MOREX.r2.1HG0052590
HORVU.MOREX.r2.1HG0052600
HORVU.MOREX.r2.1HG0052800
HORVU.MOREX.r2.1HG0052830
HORVU.MOREX.r2.1HG0052860
HORVU.MOREX.r2.1HG0052870
HORVU.MOREX.r2.1HG0052920
HORVU.MOREX.r2.1HG0053010
HORVU.MOREX.r2.1HG0053020
HORVU.MOREX.r2.1HG0053070
HORVU.MOREX.r2.1HG0053170
HORVU.MOREX.r2.1HG0053180
HORVU.MOREX.r2.1HG0053290
HORVU.MOREX.r2.1HG0053340
HORVU.MOREX.r2.1HG0053420
HORVU.MOREX.r2.1HG0053440
HORVU.MOREX.r2.1HG0053490
HORVU.MOREX.r2.1HG0053570
HORVU.MOREX.r2.1HG0053600
HORVU.MOREX.r2.1HG0053660
HORVU.MOREX.r2.1HG0053780
HORVU.MOREX.r2.1HG0053790
HORVU.MOREX.r2.1HG0053810
HORVU.MOREX.r2.1HG0053840
HORVU.MOREX.r2.1HG0053860
HORVU.MOREX.r2.1HG0053890
HORVU.MOREX.r2.1HG0053910
HORVU.MOREX.r2.1HG0053920
HORVU.MOREX.r2.1HG0054160
HORVU.MOREX.r2.1HG0054330
HORVU.MOREX.r2.1HG0054340
HORVU.MOREX.r2.1HG0054360
HORVU.MOREX.r2.1HG0054550
HORVU.MOREX.r2.1HG0054720
HORVU.MOREX.r2.1HG0054750
HORVU.MOREX.r2.1HG0054760
HORVU.MOREX.r2.1HG0054820
HORVU.MOREX.r2.1HG0054850
HORVU.MOREX.r2.1HG0054890
HORVU.MOREX.r2.1HG0054900
HORVU.MOREX.r2.1HG0055060
HORVU.MOREX.r2.1HG0055100
HORVU.MOREX.r2.1HG0055140
HORVU.MOREX.r2.1HG0055170
HORVU.MOREX.r2.1HG0055200
HORVU.MOREX.r2.1HG0055210
HORVU.MOREX.r2.1HG0055220
HORVU.MOREX.r2.1HG0055240
HORVU.MOREX.r2.1HG0055250
HORVU.MOREX.r2.1HG0055260
HORVU.MOREX.r2.1HG0055450
HORVU.MOREX.r2.1HG0055460
HORVU.MOREX.r2.1HG0055520
HORVU.MOREX.r2.1HG0055570
HORVU.MOREX.r2.1HG0055640
HORVU.MOREX.r2.1HG0055690
HORVU.MOREX.r2.1HG0055800
HORVU.MOREX.r2.1HG0055810
HORVU.MOREX.r2.1HG0055860
HORVU.MOREX.r2.1HG0055890
HORVU.MOREX.r2.1HG0055940
HORVU.MOREX.r2.1HG0055980
HORVU.MOREX.r2.1HG0056000
HORVU.MOREX.r2.1HG0056030
HORVU.MOREX.r2.1HG0056040
HORVU.MOREX.r2.1HG0056050
HORVU.MOREX.r2.1HG0056070
HORVU.MOREX.r2.1HG0056090
HORVU.MOREX.r2.1HG0056100
HORVU.MOREX.r2.1HG0056110
HORVU.MOREX.r2.1HG0056140
HORVU.MOREX.r2.1HG0056150
HORVU.MOREX.r2.1HG0056180
HORVU.MOREX.r2.1HG0056240
HORVU.MOREX.r2.1HG0056300
HORVU.MOREX.r2.1HG0056320
HORVU.MOREX.r2.1HG0056350
HORVU.MOREX.r2.1HG0056390
HORVU.MOREX.r2.1HG0056470
HORVU.MOREX.r2.1HG0056500
HORVU.MOREX.r2.1HG0056600
HORVU.MOREX.r2.1HG0056620
HORVU.MOREX.r2.1HG0056630
HORVU.MOREX.r2.1HG0056670
HORVU.MOREX.r2.1HG0056720
HORVU.MOREX.r2.1HG0056790
HORVU.MOREX.r2.1HG0056840
HORVU.MOREX.r2.1HG0056930
HORVU.MOREX.r2.1HG0056950
HORVU.MOREX.r2.1HG0056960
HORVU.MOREX.r2.1HG0057000
HORVU.MOREX.r2.1HG0057020
HORVU.MOREX.r2.1HG0057040
HORVU.MOREX.r2.1HG0057070
HORVU.MOREX.r2.1HG0057150
HORVU.MOREX.r2.1HG0057180
HORVU.MOREX.r2.1HG0057190
HORVU.MOREX.r2.1HG0057260
HORVU.MOREX.r2.1HG0057310
HORVU.MOREX.r2.1HG0057320
HORVU.MOREX.r2.1HG0057350
HORVU.MOREX.r2.1HG0057360
HORVU.MOREX.r2.1HG0057400
HORVU.MOREX.r2.1HG0057490
HORVU.MOREX.r2.1HG0057520
HORVU.MOREX.r2.1HG0057550
HORVU.MOREX.r2.1HG0057630
HORVU.MOREX.r2.1HG0057680
HORVU.MOREX.r2.1HG0057810
HORVU.MOREX.r2.1HG0057820
HORVU.MOREX.r2.1HG0057910
HORVU.MOREX.r2.1HG0057920
HORVU.MOREX.r2.1HG0058030
HORVU.MOREX.r2.1HG0058040
HORVU.MOREX.r2.1HG0058060
HORVU.MOREX.r2.1HG0058150
HORVU.MOREX.r2.1HG0058180
HORVU.MOREX.r2.1HG0058310
HORVU.MOREX.r2.1HG0058350
HORVU.MOREX.r2.1HG0058360
HORVU.MOREX.r2.1HG0058430
HORVU.MOREX.r2.1HG0058450
HORVU.MOREX.r2.1HG0058580
HORVU.MOREX.r2.1HG0058600
HORVU.MOREX.r2.1HG0058670
HORVU.MOREX.r2.1HG0058700
HORVU.MOREX.r2.1HG0058710
HORVU.MOREX.r2.1HG0058750
HORVU.MOREX.r2.1HG0058770
HORVU.MOREX.r2.1HG0058790
HORVU.MOREX.r2.1HG0058860
HORVU.MOREX.r2.1HG0058880
HORVU.MOREX.r2.1HG0058890
HORVU.MOREX.r2.1HG0058930
HORVU.MOREX.r2.1HG0058990
HORVU.MOREX.r2.1HG0059020
HORVU.MOREX.r2.1HG0059030
HORVU.MOREX.r2.1HG0059060
HORVU.MOREX.r2.1HG0059070
HORVU.MOREX.r2.1HG0059090
HORVU.MOREX.r2.1HG0059130
HORVU.MOREX.r2.1HG0059150
HORVU.MOREX.r2.1HG0059160
HORVU.MOREX.r2.1HG0059170
HORVU.MOREX.r2.1HG0059200
HORVU.MOREX.r2.1HG0059240
HORVU.MOREX.r2.1HG0059250
HORVU.MOREX.r2.1HG0059260
HORVU.MOREX.r2.1HG0059310
HORVU.MOREX.r2.1HG0059330
HORVU.MOREX.r2.1HG0059440
HORVU.MOREX.r2.1HG0059510
HORVU.MOREX.r2.1HG0059540
HORVU.MOREX.r2.1HG0059580
HORVU.MOREX.r2.1HG0059640
HORVU.MOREX.r2.1HG0059670
HORVU.MOREX.r2.1HG0059720
HORVU.MOREX.r2.1HG0059750
HORVU.MOREX.r2.1HG0059770
HORVU.MOREX.r2.1HG0059820
HORVU.MOREX.r2.1HG0059860
HORVU.MOREX.r2.1HG0059880
HORVU.MOREX.r2.1HG0059890
HORVU.MOREX.r2.1HG0059900
HORVU.MOREX.r2.1HG0059930
HORVU.MOREX.r2.1HG0060050
HORVU.MOREX.r2.1HG0060060
HORVU.MOREX.r2.1HG0060080
HORVU.MOREX.r2.1HG0060090
HORVU.MOREX.r2.1HG0060140
HORVU.MOREX.r2.1HG0060170
HORVU.MOREX.r2.1HG0060180
HORVU.MOREX.r2.1HG0060190
HORVU.MOREX.r2.1HG0060220
HORVU.MOREX.r2.1HG0060230
HORVU.MOREX.r2.1HG0060390
HORVU.MOREX.r2.1HG0060400
HORVU.MOREX.r2.1HG0060440
HORVU.MOREX.r2.1HG0060450
HORVU.MOREX.r2.1HG0060460
HORVU.MOREX.r2.1HG0060470
HORVU.MOREX.r2.1HG0060510
HORVU.MOREX.r2.1HG0060530
HORVU.MOREX.r2.1HG0060620
HORVU.MOREX.r2.1HG0060690
HORVU.MOREX.r2.1HG0060710
HORVU.MOREX.r2.1HG0060760
HORVU.MOREX.r2.1HG0060790
HORVU.MOREX.r2.1HG0060800
HORVU.MOREX.r2.1HG0060860
HORVU.MOREX.r2.1HG0060880
HORVU.MOREX.r2.1HG0060900
HORVU.MOREX.r2.1HG0060910
HORVU.MOREX.r2.1HG0060990
HORVU.MOREX.r2.1HG0061050
HORVU.MOREX.r2.1HG0061150
HORVU.MOREX.r2.1HG0061190
HORVU.MOREX.r2.1HG0061210
HORVU.MOREX.r2.1HG0061220
HORVU.MOREX.r2.1HG0061260
HORVU.MOREX.r2.1HG0061280
HORVU.MOREX.r2.1HG0061290
HORVU.MOREX.r2.1HG0061300
HORVU.MOREX.r2.1HG0061310
HORVU.MOREX.r2.1HG0061370
HORVU.MOREX.r2.1HG0061410
HORVU.MOREX.r2.1HG0061450
HORVU.MOREX.r2.1HG0061520
HORVU.MOREX.r2.1HG0061580
HORVU.MOREX.r2.1HG0061610
HORVU.MOREX.r2.1HG0061640
HORVU.MOREX.r2.1HG0061660
HORVU.MOREX.r2.1HG0061700
HORVU.MOREX.r2.1HG0061720
HORVU.MOREX.r2.1HG0061740
HORVU.MOREX.r2.1HG0061800
HORVU.MOREX.r2.1HG0061820
HORVU.MOREX.r2.1HG0061870
HORVU.MOREX.r2.1HG0061930
HORVU.MOREX.r2.1HG0061950
HORVU.MOREX.r2.1HG0062030
HORVU.MOREX.r2.1HG0062110
HORVU.MOREX.r2.1HG0062130
HORVU.MOREX.r2.1HG0062250
HORVU.MOREX.r2.1HG0062260
HORVU.MOREX.r2.1HG0062370
HORVU.MOREX.r2.1HG0062410
HORVU.MOREX.r2.1HG0062420
HORVU.MOREX.r2.1HG0062440
HORVU.MOREX.r2.1HG0062530
HORVU.MOREX.r2.1HG0062580
HORVU.MOREX.r2.1HG0062600
HORVU.MOREX.r2.1HG0062610
HORVU.MOREX.r2.1HG0062620
HORVU.MOREX.r2.1HG0062630
HORVU.MOREX.r2.1HG0062640
HORVU.MOREX.r2.1HG0062670
HORVU.MOREX.r2.1HG0062680
HORVU.MOREX.r2.1HG0062720
HORVU.MOREX.r2.1HG0062820
HORVU.MOREX.r2.1HG0062840
HORVU.MOREX.r2.1HG0062900
HORVU.MOREX.r2.1HG0062910
HORVU.MOREX.r2.1HG0062920
HORVU.MOREX.r2.1HG0062960
HORVU.MOREX.r2.1HG0063070
HORVU.MOREX.r2.1HG0063080
HORVU.MOREX.r2.1HG0063140
HORVU.MOREX.r2.1HG0063260
HORVU.MOREX.r2.1HG0063270
HORVU.MOREX.r2.1HG0063300
HORVU.MOREX.r2.1HG0063310
HORVU.MOREX.r2.1HG0063340
HORVU.MOREX.r2.1HG0063390
HORVU.MOREX.r2.1HG0063400
HORVU.MOREX.r2.1HG0063520
HORVU.MOREX.r2.1HG0063530
HORVU.MOREX.r2.1HG0063540
HORVU.MOREX.r2.1HG0063620
HORVU.MOREX.r2.1HG0063650
HORVU.MOREX.r2.1HG0063660
HORVU.MOREX.r2.1HG0063710
HORVU.MOREX.r2.1HG0063730
HORVU.MOREX.r2.1HG0063750
HORVU.MOREX.r2.1HG0063860
HORVU.MOREX.r2.1HG0063900
HORVU.MOREX.r2.1HG0063930
HORVU.MOREX.r2.1HG0063940
HORVU.MOREX.r2.1HG0063980
HORVU.MOREX.r2.1HG0064000
HORVU.MOREX.r2.1HG0064040
HORVU.MOREX.r2.1HG0064090
HORVU.MOREX.r2.1HG0064100
HORVU.MOREX.r2.1HG0064150
HORVU.MOREX.r2.1HG0064160
HORVU.MOREX.r2.1HG0064230
HORVU.MOREX.r2.1HG0064240
HORVU.MOREX.r2.1HG0064250
HORVU.MOREX.r2.1HG0064290
HORVU.MOREX.r2.1HG0064310
HORVU.MOREX.r2.1HG0064350
HORVU.MOREX.r2.1HG0064400
HORVU.MOREX.r2.1HG0064440
HORVU.MOREX.r2.1HG0064520
HORVU.MOREX.r2.1HG0064550
HORVU.MOREX.r2.1HG0064610
HORVU.MOREX.r2.1HG0064690
HORVU.MOREX.r2.1HG0064720
HORVU.MOREX.r2.1HG0064740
HORVU.MOREX.r2.1HG0064900
HORVU.MOREX.r2.1HG0064940
HORVU.MOREX.r2.1HG0064970
HORVU.MOREX.r2.1HG0065010
HORVU.MOREX.r2.1HG0065060
HORVU.MOREX.r2.1HG0065080
HORVU.MOREX.r2.1HG0065150
HORVU.MOREX.r2.1HG0065230
HORVU.MOREX.r2.1HG0065250
HORVU.MOREX.r2.1HG0065460
HORVU.MOREX.r2.1HG0065480
HORVU.MOREX.r2.1HG0065490
HORVU.MOREX.r2.1HG0065550
HORVU.MOREX.r2.1HG0065570
HORVU.MOREX.r2.1HG0065600
HORVU.MOREX.r2.1HG0065610
HORVU.MOREX.r2.1HG0065710
HORVU.MOREX.r2.1HG0065720
HORVU.MOREX.r2.1HG0065820
HORVU.MOREX.r2.1HG0065890
HORVU.MOREX.r2.1HG0065910
HORVU.MOREX.r2.1HG0065960
HORVU.MOREX.r2.1HG0066030
HORVU.MOREX.r2.1HG0066050
HORVU.MOREX.r2.1HG0066060
HORVU.MOREX.r2.1HG0066160
HORVU.MOREX.r2.1HG0066180
HORVU.MOREX.r2.1HG0066190
HORVU.MOREX.r2.1HG0066210
HORVU.MOREX.r2.1HG0066230
HORVU.MOREX.r2.1HG0066320
HORVU.MOREX.r2.1HG0066340
HORVU.MOREX.r2.1HG0066400
HORVU.MOREX.r2.1HG0066410
HORVU.MOREX.r2.1HG0066500
HORVU.MOREX.r2.1HG0066510
HORVU.MOREX.r2.1HG0066540
HORVU.MOREX.r2.1HG0066560
HORVU.MOREX.r2.1HG0066600
HORVU.MOREX.r2.1HG0066610
HORVU.MOREX.r2.1HG0066720
HORVU.MOREX.r2.1HG0066800
HORVU.MOREX.r2.1HG0066810
HORVU.MOREX.r2.1HG0066840
HORVU.MOREX.r2.1HG0066850
HORVU.MOREX.r2.1HG0066870
HORVU.MOREX.r2.1HG0066880
HORVU.MOREX.r2.1HG0066900
HORVU.MOREX.r2.1HG0066910
HORVU.MOREX.r2.1HG0066970
HORVU.MOREX.r2.1HG0066990
HORVU.MOREX.r2.1HG0067010
HORVU.MOREX.r2.1HG0067070
HORVU.MOREX.r2.1HG0067080
HORVU.MOREX.r2.1HG0067160
HORVU.MOREX.r2.1HG0067220
HORVU.MOREX.r2.1HG0067230
HORVU.MOREX.r2.1HG0067260
HORVU.MOREX.r2.1HG0067330
HORVU.MOREX.r2.1HG0067390
HORVU.MOREX.r2.1HG0067430
HORVU.MOREX.r2.1HG0067440
HORVU.MOREX.r2.1HG0067480
HORVU.MOREX.r2.1HG0067490
HORVU.MOREX.r2.1HG0067520
HORVU.MOREX.r2.1HG0067540
HORVU.MOREX.r2.1HG0067560
HORVU.MOREX.r2.1HG0067570
HORVU.MOREX.r2.1HG0067800
HORVU.MOREX.r2.1HG0067820
HORVU.MOREX.r2.1HG0067830
HORVU.MOREX.r2.1HG0067840
HORVU.MOREX.r2.1HG0067870
HORVU.MOREX.r2.1HG0067900
HORVU.MOREX.r2.1HG0067940
HORVU.MOREX.r2.1HG0068000
HORVU.MOREX.r2.1HG0068050
HORVU.MOREX.r2.1HG0068060
HORVU.MOREX.r2.1HG0068170
HORVU.MOREX.r2.1HG0068180
HORVU.MOREX.r2.1HG0068190
HORVU.MOREX.r2.1HG0068210
HORVU.MOREX.r2.1HG0068220
HORVU.MOREX.r2.1HG0068250
HORVU.MOREX.r2.1HG0068260
HORVU.MOREX.r2.1HG0068290
HORVU.MOREX.r2.1HG0068300
HORVU.MOREX.r2.1HG0068310
HORVU.MOREX.r2.1HG0068360
HORVU.MOREX.r2.1HG0068380
HORVU.MOREX.r2.1HG0068420
HORVU.MOREX.r2.1HG0068480
HORVU.MOREX.r2.1HG0068550
HORVU.MOREX.r2.1HG0068600
HORVU.MOREX.r2.1HG0068610
HORVU.MOREX.r2.1HG0068660
HORVU.MOREX.r2.1HG0068680
HORVU.MOREX.r2.1HG0068740
HORVU.MOREX.r2.1HG0068760
HORVU.MOREX.r2.1HG0068800
HORVU.MOREX.r2.1HG0068840
HORVU.MOREX.r2.1HG0068850
HORVU.MOREX.r2.1HG0068960
HORVU.MOREX.r2.1HG0069000
HORVU.MOREX.r2.1HG0069020
HORVU.MOREX.r2.1HG0069040
HORVU.MOREX.r2.1HG0069050
HORVU.MOREX.r2.1HG0069120
HORVU.MOREX.r2.1HG0069130
HORVU.MOREX.r2.1HG0069240
HORVU.MOREX.r2.1HG0069310
HORVU.MOREX.r2.1HG0069350
HORVU.MOREX.r2.1HG0069420
HORVU.MOREX.r2.1HG0069600
HORVU.MOREX.r2.1HG0069640
HORVU.MOREX.r2.1HG0069670
HORVU.MOREX.r2.1HG0069780
HORVU.MOREX.r2.1HG0069790
HORVU.MOREX.r2.1HG0069860
HORVU.MOREX.r2.1HG0069880
HORVU.MOREX.r2.1HG0069900
HORVU.MOREX.r2.1HG0069930
HORVU.MOREX.r2.1HG0069960
HORVU.MOREX.r2.1HG0070010
HORVU.MOREX.r2.1HG0070020
HORVU.MOREX.r2.1HG0070040
HORVU.MOREX.r2.1HG0070080
HORVU.MOREX.r2.1HG0070090
HORVU.MOREX.r2.1HG0070100
HORVU.MOREX.r2.1HG0070130
HORVU.MOREX.r2.1HG0070170
HORVU.MOREX.r2.1HG0070190
HORVU.MOREX.r2.1HG0070240
HORVU.MOREX.r2.1HG0070250
HORVU.MOREX.r2.1HG0070300
HORVU.MOREX.r2.1HG0070310
HORVU.MOREX.r2.1HG0070400
HORVU.MOREX.r2.1HG0070460
HORVU.MOREX.r2.1HG0070480
HORVU.MOREX.r2.1HG0070490
HORVU.MOREX.r2.1HG0070520
HORVU.MOREX.r2.1HG0070580
HORVU.MOREX.r2.1HG0070610
HORVU.MOREX.r2.1HG0070680
HORVU.MOREX.r2.1HG0070730
HORVU.MOREX.r2.1HG0070850
HORVU.MOREX.r2.1HG0070860
HORVU.MOREX.r2.1HG0070950
HORVU.MOREX.r2.1HG0070960
HORVU.MOREX.r2.1HG0071020
HORVU.MOREX.r2.1HG0071060
HORVU.MOREX.r2.1HG0071150
HORVU.MOREX.r2.1HG0071220
HORVU.MOREX.r2.1HG0071240
HORVU.MOREX.r2.1HG0071270
HORVU.MOREX.r2.1HG0071510
HORVU.MOREX.r2.1HG0071600
HORVU.MOREX.r2.1HG0071620
HORVU.MOREX.r2.1HG0071770
HORVU.MOREX.r2.1HG0071830
HORVU.MOREX.r2.1HG0071940
HORVU.MOREX.r2.1HG0072050
HORVU.MOREX.r2.1HG0072140
HORVU.MOREX.r2.1HG0072210
HORVU.MOREX.r2.1HG0072310
HORVU.MOREX.r2.1HG0072340
HORVU.MOREX.r2.1HG0072360
HORVU.MOREX.r2.1HG0072390
HORVU.MOREX.r2.1HG0072640
HORVU.MOREX.r2.1HG0072650
HORVU.MOREX.r2.1HG0072660
HORVU.MOREX.r2.1HG0072680
HORVU.MOREX.r2.1HG0072720
HORVU.MOREX.r2.1HG0072750
HORVU.MOREX.r2.1HG0072780
HORVU.MOREX.r2.1HG0072790
HORVU.MOREX.r2.1HG0072820
HORVU.MOREX.r2.1HG0072860
HORVU.MOREX.r2.1HG0072870
HORVU.MOREX.r2.1HG0072890
HORVU.MOREX.r2.1HG0073120
HORVU.MOREX.r2.1HG0073180
HORVU.MOREX.r2.1HG0073210
HORVU.MOREX.r2.1HG0073230
HORVU.MOREX.r2.1HG0073250
HORVU.MOREX.r2.1HG0073280
HORVU.MOREX.r2.1HG0073290
HORVU.MOREX.r2.1HG0073330
HORVU.MOREX.r2.1HG0073350
HORVU.MOREX.r2.1HG0073450
HORVU.MOREX.r2.1HG0073480
HORVU.MOREX.r2.1HG0073500
HORVU.MOREX.r2.1HG0073510
HORVU.MOREX.r2.1HG0073610
HORVU.MOREX.r2.1HG0073640
HORVU.MOREX.r2.1HG0073700
HORVU.MOREX.r2.1HG0073720
HORVU.MOREX.r2.1HG0073730
HORVU.MOREX.r2.1HG0073740
HORVU.MOREX.r2.1HG0073870
HORVU.MOREX.r2.1HG0073960
HORVU.MOREX.r2.1HG0073980
HORVU.MOREX.r2.1HG0074000
HORVU.MOREX.r2.1HG0074010
HORVU.MOREX.r2.1HG0074040
HORVU.MOREX.r2.1HG0074060
HORVU.MOREX.r2.1HG0074080
HORVU.MOREX.r2.1HG0074100
HORVU.MOREX.r2.1HG0074110
HORVU.MOREX.r2.1HG0074140
HORVU.MOREX.r2.1HG0074160
HORVU.MOREX.r2.1HG0074170
HORVU.MOREX.r2.1HG0074190
HORVU.MOREX.r2.1HG0074230
HORVU.MOREX.r2.1HG0074280
HORVU.MOREX.r2.1HG0074290
HORVU.MOREX.r2.1HG0074300
HORVU.MOREX.r2.1HG0074360
HORVU.MOREX.r2.1HG0074410
HORVU.MOREX.r2.1HG0074680
HORVU.MOREX.r2.1HG0074690
HORVU.MOREX.r2.1HG0074760
HORVU.MOREX.r2.1HG0074900
HORVU.MOREX.r2.1HG0075140
HORVU.MOREX.r2.1HG0075150
HORVU.MOREX.r2.1HG0075160
HORVU.MOREX.r2.1HG0075180
HORVU.MOREX.r2.1HG0075440
HORVU.MOREX.r2.1HG0075470
HORVU.MOREX.r2.1HG0075480
HORVU.MOREX.r2.1HG0075620
HORVU.MOREX.r2.1HG0075650
HORVU.MOREX.r2.1HG0075660
HORVU.MOREX.r2.1HG0075680
HORVU.MOREX.r2.1HG0075740
HORVU.MOREX.r2.1HG0075750
HORVU.MOREX.r2.1HG0075770
HORVU.MOREX.r2.1HG0075790
HORVU.MOREX.r2.1HG0075830
HORVU.MOREX.r2.1HG0075860
HORVU.MOREX.r2.1HG0075920
HORVU.MOREX.r2.1HG0075930
HORVU.MOREX.r2.1HG0075960
HORVU.MOREX.r2.1HG0075990
HORVU.MOREX.r2.1HG0076110
HORVU.MOREX.r2.1HG0076150
HORVU.MOREX.r2.1HG0076180
HORVU.MOREX.r2.1HG0076200
HORVU.MOREX.r2.1HG0076210
HORVU.MOREX.r2.1HG0076220
HORVU.MOREX.r2.1HG0076290
HORVU.MOREX.r2.1HG0076340
HORVU.MOREX.r2.1HG0076360
HORVU.MOREX.r2.1HG0076380
HORVU.MOREX.r2.1HG0076420
HORVU.MOREX.r2.1HG0076430
HORVU.MOREX.r2.1HG0076460
HORVU.MOREX.r2.1HG0076480
HORVU.MOREX.r2.1HG0076490
HORVU.MOREX.r2.1HG0076520
HORVU.MOREX.r2.1HG0076530
HORVU.MOREX.r2.1HG0076590
HORVU.MOREX.r2.1HG0076600
HORVU.MOREX.r2.1HG0076620
HORVU.MOREX.r2.1HG0076630
HORVU.MOREX.r2.1HG0076690
HORVU.MOREX.r2.1HG0076700
HORVU.MOREX.r2.1HG0076710
HORVU.MOREX.r2.1HG0076720
HORVU.MOREX.r2.1HG0076790
HORVU.MOREX.r2.1HG0076840
HORVU.MOREX.r2.1HG0076860
HORVU.MOREX.r2.1HG0076870
HORVU.MOREX.r2.1HG0076880
HORVU.MOREX.r2.1HG0077200
HORVU.MOREX.r2.1HG0077240
HORVU.MOREX.r2.1HG0077330
HORVU.MOREX.r2.1HG0077380
HORVU.MOREX.r2.1HG0077450
HORVU.MOREX.r2.1HG0077480
HORVU.MOREX.r2.1HG0077490
HORVU.MOREX.r2.1HG0077690
HORVU.MOREX.r2.1HG0077750
HORVU.MOREX.r2.1HG0077760
HORVU.MOREX.r2.1HG0077830
HORVU.MOREX.r2.1HG0077880
HORVU.MOREX.r2.1HG0077910
HORVU.MOREX.r2.1HG0077940
HORVU.MOREX.r2.1HG0078020
HORVU.MOREX.r2.1HG0078030
HORVU.MOREX.r2.1HG0078100
HORVU.MOREX.r2.1HG0078140
HORVU.MOREX.r2.1HG0078180
HORVU.MOREX.r2.1HG0078200
HORVU.MOREX.r2.1HG0078240
HORVU.MOREX.r2.1HG0078260
HORVU.MOREX.r2.1HG0078370
HORVU.MOREX.r2.1HG0078380
HORVU.MOREX.r2.1HG0078400
HORVU.MOREX.r2.1HG0078410
HORVU.MOREX.r2.1HG0078440
HORVU.MOREX.r2.1HG0078510
HORVU.MOREX.r2.1HG0078540
HORVU.MOREX.r2.1HG0078620
HORVU.MOREX.r2.1HG0078650
HORVU.MOREX.r2.1HG0078670
HORVU.MOREX.r2.1HG0078680
HORVU.MOREX.r2.1HG0078730
HORVU.MOREX.r2.1HG0000050
HORVU.MOREX.r2.1HG0000060
HORVU.MOREX.r2.1HG0000070
HORVU.MOREX.r2.1HG0000110
HORVU.MOREX.r2.1HG0000140
HORVU.MOREX.r2.1HG0000150
HORVU.MOREX.r2.1HG0000180
HORVU.MOREX.r2.1HG0000230
HORVU.MOREX.r2.1HG0000270
HORVU.MOREX.r2.1HG0000300
HORVU.MOREX.r2.1HG0000330
HORVU.MOREX.r2.1HG0000440
HORVU.MOREX.r2.1HG0000450
HORVU.MOREX.r2.1HG0000470
HORVU.MOREX.r2.1HG0000670
HORVU.MOREX.r2.1HG0000700
HORVU.MOREX.r2.1HG0000730
HORVU.MOREX.r2.1HG0000770
HORVU.MOREX.r2.1HG0000870
HORVU.MOREX.r2.1HG0001030
HORVU.MOREX.r2.1HG0001120
HORVU.MOREX.r2.1HG0001240
HORVU.MOREX.r2.1HG0001530
HORVU.MOREX.r2.1HG0001550
HORVU.MOREX.r2.1HG0001580
HORVU.MOREX.r2.1HG0001590
HORVU.MOREX.r2.1HG0001610
HORVU.MOREX.r2.1HG0001620
HORVU.MOREX.r2.1HG0001630
HORVU.MOREX.r2.1HG0001790
HORVU.MOREX.r2.1HG0001870
HORVU.MOREX.r2.1HG0001900
HORVU.MOREX.r2.1HG0001980
HORVU.MOREX.r2.1HG0002040
HORVU.MOREX.r2.1HG0002050
HORVU.MOREX.r2.1HG0002070
HORVU.MOREX.r2.1HG0002080
HORVU.MOREX.r2.1HG0002090
HORVU.MOREX.r2.1HG0002150
HORVU.MOREX.r2.1HG0002170
HORVU.MOREX.r2.1HG0002180
HORVU.MOREX.r2.1HG0002200
HORVU.MOREX.r2.1HG0002310
HORVU.MOREX.r2.1HG0002320
HORVU.MOREX.r2.1HG0002330
HORVU.MOREX.r2.1HG0002390
HORVU.MOREX.r2.1HG0002410
HORVU.MOREX.r2.1HG0002620
HORVU.MOREX.r2.1HG0002630
HORVU.MOREX.r2.1HG0002650
HORVU.MOREX.r2.1HG0002740
HORVU.MOREX.r2.1HG0002790
HORVU.MOREX.r2.1HG0002860
HORVU.MOREX.r2.1HG0002880
HORVU.MOREX.r2.1HG0002910
HORVU.MOREX.r2.1HG0003050
HORVU.MOREX.r2.1HG0003080
HORVU.MOREX.r2.1HG0003150
HORVU.MOREX.r2.1HG0003170
HORVU.MOREX.r2.1HG0003210
HORVU.MOREX.r2.1HG0003330
HORVU.MOREX.r2.1HG0003390
HORVU.MOREX.r2.1HG0003460
HORVU.MOREX.r2.1HG0003470
HORVU.MOREX.r2.1HG0003600
HORVU.MOREX.r2.1HG0003620
HORVU.MOREX.r2.1HG0003730
HORVU.MOREX.r2.1HG0003750
HORVU.MOREX.r2.1HG0003760
HORVU.MOREX.r2.1HG0003840
HORVU.MOREX.r2.1HG0003870
HORVU.MOREX.r2.1HG0003880
HORVU.MOREX.r2.1HG0003940
HORVU.MOREX.r2.1HG0003950
HORVU.MOREX.r2.1HG0003970
HORVU.MOREX.r2.1HG0004030
HORVU.MOREX.r2.1HG0004070
HORVU.MOREX.r2.1HG0004080
HORVU.MOREX.r2.1HG0004130
HORVU.MOREX.r2.1HG0004270
HORVU.MOREX.r2.1HG0004310
HORVU.MOREX.r2.1HG0004320
HORVU.MOREX.r2.1HG0004330
HORVU.MOREX.r2.1HG0004360
HORVU.MOREX.r2.1HG0004410
HORVU.MOREX.r2.1HG0004430
HORVU.MOREX.r2.1HG0004560
HORVU.MOREX.r2.1HG0004630
HORVU.MOREX.r2.1HG0004680
HORVU.MOREX.r2.1HG0004700
HORVU.MOREX.r2.1HG0004730
HORVU.MOREX.r2.1HG0004740
HORVU.MOREX.r2.1HG0004760
HORVU.MOREX.r2.1HG0004800
HORVU.MOREX.r2.1HG0004820
HORVU.MOREX.r2.1HG0004840
HORVU.MOREX.r2.1HG0004850
HORVU.MOREX.r2.1HG0005350
HORVU.MOREX.r2.1HG0005420
HORVU.MOREX.r2.1HG0005480
HORVU.MOREX.r2.1HG0005540
HORVU.MOREX.r2.1HG0005640
HORVU.MOREX.r2.1HG0005680
HORVU.MOREX.r2.1HG0005800
HORVU.MOREX.r2.1HG0005810
HORVU.MOREX.r2.1HG0005860
HORVU.MOREX.r2.1HG0005880
HORVU.MOREX.r2.1HG0005970
HORVU.MOREX.r2.1HG0005990
HORVU.MOREX.r2.1HG0006010
HORVU.MOREX.r2.1HG0006130
HORVU.MOREX.r2.1HG0006140
HORVU.MOREX.r2.1HG0006180
HORVU.MOREX.r2.1HG0006200
HORVU.MOREX.r2.1HG0006210
HORVU.MOREX.r2.1HG0006360
HORVU.MOREX.r2.1HG0006370
HORVU.MOREX.r2.1HG0006390
HORVU.MOREX.r2.1HG0006400
HORVU.MOREX.r2.1HG0006410
HORVU.MOREX.r2.1HG0006430
HORVU.MOREX.r2.1HG0006530
HORVU.MOREX.r2.1HG0006540
HORVU.MOREX.r2.1HG0006560
HORVU.MOREX.r2.1HG0006590
HORVU.MOREX.r2.1HG0006630
HORVU.MOREX.r2.1HG0006680
HORVU.MOREX.r2.1HG0006710
HORVU.MOREX.r2.1HG0006720
HORVU.MOREX.r2.1HG0006910
HORVU.MOREX.r2.1HG0006980
HORVU.MOREX.r2.1HG0006990
HORVU.MOREX.r2.1HG0007010
HORVU.MOREX.r2.1HG0007090
HORVU.MOREX.r2.1HG0007120
HORVU.MOREX.r2.1HG0007290
HORVU.MOREX.r2.1HG0007340
HORVU.MOREX.r2.1HG0007650
HORVU.MOREX.r2.1HG0007670
HORVU.MOREX.r2.1HG0007720
HORVU.MOREX.r2.1HG0008100
HORVU.MOREX.r2.1HG0008110
HORVU.MOREX.r2.1HG0008120
HORVU.MOREX.r2.1HG0008130
HORVU.MOREX.r2.1HG0008270
HORVU.MOREX.r2.1HG0008320
HORVU.MOREX.r2.1HG0008340
HORVU.MOREX.r2.1HG0008370
HORVU.MOREX.r2.1HG0008380
HORVU.MOREX.r2.1HG0008420
HORVU.MOREX.r2.1HG0008590
HORVU.MOREX.r2.1HG0008890
HORVU.MOREX.r2.1HG0008900
HORVU.MOREX.r2.1HG0008940
HORVU.MOREX.r2.1HG0009100
HORVU.MOREX.r2.1HG0009140
HORVU.MOREX.r2.1HG0009190
HORVU.MOREX.r2.1HG0009240
HORVU.MOREX.r2.1HG0009250
HORVU.MOREX.r2.1HG0009260
HORVU.MOREX.r2.1HG0009310
HORVU.MOREX.r2.1HG0009340
HORVU.MOREX.r2.1HG0009350
HORVU.MOREX.r2.1HG0009420
HORVU.MOREX.r2.1HG0009610
HORVU.MOREX.r2.1HG0009620
HORVU.MOREX.r2.1HG0009630
HORVU.MOREX.r2.1HG0009700
HORVU.MOREX.r2.1HG0009760
HORVU.MOREX.r2.1HG0009780
HORVU.MOREX.r2.1HG0009900
HORVU.MOREX.r2.1HG0009920
HORVU.MOREX.r2.1HG0009930
HORVU.MOREX.r2.1HG0009970
HORVU.MOREX.r2.1HG0010030
HORVU.MOREX.r2.1HG0010090
HORVU.MOREX.r2.1HG0010160
HORVU.MOREX.r2.1HG0010380
HORVU.MOREX.r2.1HG0010560
HORVU.MOREX.r2.1HG0010590
HORVU.MOREX.r2.1HG0010610
HORVU.MOREX.r2.1HG0010640
HORVU.MOREX.r2.1HG0010650
HORVU.MOREX.r2.1HG0010750
HORVU.MOREX.r2.1HG0010770
HORVU.MOREX.r2.1HG0010840
HORVU.MOREX.r2.1HG0010950
HORVU.MOREX.r2.1HG0010980
HORVU.MOREX.r2.1HG0011040
HORVU.MOREX.r2.1HG0011120
HORVU.MOREX.r2.1HG0011150
HORVU.MOREX.r2.1HG0011170
HORVU.MOREX.r2.1HG0011210
HORVU.MOREX.r2.1HG0011270
HORVU.MOREX.r2.1HG0011280
HORVU.MOREX.r2.1HG0011320
HORVU.MOREX.r2.1HG0011420
HORVU.MOREX.r2.1HG0011460
HORVU.MOREX.r2.1HG0011580
HORVU.MOREX.r2.1HG0011590
HORVU.MOREX.r2.1HG0011610
HORVU.MOREX.r2.1HG0011660
HORVU.MOREX.r2.1HG0011690
HORVU.MOREX.r2.1HG0011700
HORVU.MOREX.r2.1HG0011850
HORVU.MOREX.r2.1HG0011860
HORVU.MOREX.r2.1HG0011910
HORVU.MOREX.r2.1HG0011920
HORVU.MOREX.r2.1HG0012330
HORVU.MOREX.r2.1HG0012390
HORVU.MOREX.r2.1HG0012470
HORVU.MOREX.r2.1HG0012490
HORVU.MOREX.r2.1HG0012580
HORVU.MOREX.r2.1HG0012620
HORVU.MOREX.r2.1HG0012630
HORVU.MOREX.r2.1HG0012660
HORVU.MOREX.r2.1HG0012710
HORVU.MOREX.r2.1HG0012730
HORVU.MOREX.r2.1HG0012740
HORVU.MOREX.r2.1HG0012750
HORVU.MOREX.r2.1HG0012760
HORVU.MOREX.r2.1HG0012860
HORVU.MOREX.r2.1HG0012880
HORVU.MOREX.r2.1HG0012890
HORVU.MOREX.r2.1HG0012910
HORVU.MOREX.r2.1HG0012970
HORVU.MOREX.r2.1HG0013080
HORVU.MOREX.r2.1HG0013090
HORVU.MOREX.r2.1HG0013100
HORVU.MOREX.r2.1HG0013150
HORVU.MOREX.r2.1HG0013160
HORVU.MOREX.r2.1HG0013170
HORVU.MOREX.r2.1HG0013180
HORVU.MOREX.r2.1HG0013190
HORVU.MOREX.r2.1HG0013320
HORVU.MOREX.r2.1HG0013410
HORVU.MOREX.r2.1HG0013420
HORVU.MOREX.r2.1HG0013430
HORVU.MOREX.r2.1HG0013500
HORVU.MOREX.r2.1HG0013600
HORVU.MOREX.r2.1HG0013610
HORVU.MOREX.r2.1HG0013700
HORVU.MOREX.r2.1HG0013730
HORVU.MOREX.r2.1HG0013750
HORVU.MOREX.r2.1HG0013790
HORVU.MOREX.r2.1HG0013800
HORVU.MOREX.r2.1HG0013880
HORVU.MOREX.r2.1HG0013890
HORVU.MOREX.r2.1HG0013930
HORVU.MOREX.r2.1HG0013960
HORVU.MOREX.r2.1HG0013980
HORVU.MOREX.r2.1HG0014000
HORVU.MOREX.r2.1HG0014090
HORVU.MOREX.r2.1HG0014140
HORVU.MOREX.r2.1HG0014200
HORVU.MOREX.r2.1HG0014210
HORVU.MOREX.r2.1HG0014220
HORVU.MOREX.r2.1HG0014240
HORVU.MOREX.r2.1HG0014250
HORVU.MOREX.r2.1HG0014280
HORVU.MOREX.r2.1HG0014290
HORVU.MOREX.r2.1HG0014340
HORVU.MOREX.r2.1HG0014460
HORVU.MOREX.r2.1HG0014560
HORVU.MOREX.r2.1HG0014570
HORVU.MOREX.r2.1HG0014600
HORVU.MOREX.r2.1HG0014620
HORVU.MOREX.r2.1HG0014640
HORVU.MOREX.r2.1HG0014650
HORVU.MOREX.r2.1HG0014660
HORVU.MOREX.r2.1HG0014670
HORVU.MOREX.r2.1HG0014740
HORVU.MOREX.r2.1HG0014750
HORVU.MOREX.r2.1HG0014840
HORVU.MOREX.r2.1HG0014920
HORVU.MOREX.r2.1HG0014930
HORVU.MOREX.r2.1HG0014940
HORVU.MOREX.r2.1HG0014960
HORVU.MOREX.r2.1HG0014970
HORVU.MOREX.r2.1HG0014980
HORVU.MOREX.r2.1HG0014990
HORVU.MOREX.r2.1HG0015030
HORVU.MOREX.r2.1HG0015070
HORVU.MOREX.r2.1HG0015080
HORVU.MOREX.r2.1HG0015090
HORVU.MOREX.r2.1HG0015140
HORVU.MOREX.r2.1HG0015280
HORVU.MOREX.r2.1HG0015340
HORVU.MOREX.r2.1HG0015370
HORVU.MOREX.r2.1HG0015410
HORVU.MOREX.r2.1HG0015630
HORVU.MOREX.r2.1HG0015640
HORVU.MOREX.r2.1HG0015690
HORVU.MOREX.r2.1HG0015910
HORVU.MOREX.r2.1HG0015930
HORVU.MOREX.r2.1HG0015940
HORVU.MOREX.r2.1HG0015960
HORVU.MOREX.r2.1HG0015970
HORVU.MOREX.r2.1HG0016070
HORVU.MOREX.r2.1HG0016090
HORVU.MOREX.r2.1HG0016100
HORVU.MOREX.r2.1HG0016190
HORVU.MOREX.r2.1HG0016220
HORVU.MOREX.r2.1HG0016290
HORVU.MOREX.r2.1HG0016300
HORVU.MOREX.r2.1HG0016430
HORVU.MOREX.r2.1HG0016540
HORVU.MOREX.r2.1HG0016580
HORVU.MOREX.r2.1HG0016590
HORVU.MOREX.r2.1HG0016650
HORVU.MOREX.r2.1HG0016660
HORVU.MOREX.r2.1HG0016720
HORVU.MOREX.r2.1HG0016750
HORVU.MOREX.r2.1HG0016810
HORVU.MOREX.r2.1HG0017150
HORVU.MOREX.r2.1HG0017160
HORVU.MOREX.r2.1HG0017170
HORVU.MOREX.r2.1HG0017200
HORVU.MOREX.r2.1HG0017270
HORVU.MOREX.r2.1HG0017300
HORVU.MOREX.r2.1HG0017350
HORVU.MOREX.r2.1HG0017360
HORVU.MOREX.r2.1HG0017380
HORVU.MOREX.r2.1HG0017460
HORVU.MOREX.r2.1HG0017470
HORVU.MOREX.r2.1HG0017500
HORVU.MOREX.r2.1HG0017700
HORVU.MOREX.r2.1HG0017710
HORVU.MOREX.r2.1HG0017770
HORVU.MOREX.r2.1HG0017790
HORVU.MOREX.r2.1HG0017800
HORVU.MOREX.r2.1HG0017820
HORVU.MOREX.r2.1HG0017850
HORVU.MOREX.r2.1HG0017870
HORVU.MOREX.r2.1HG0017950
HORVU.MOREX.r2.1HG0018010
HORVU.MOREX.r2.1HG0018040
HORVU.MOREX.r2.1HG0018100
HORVU.MOREX.r2.1HG0018140
HORVU.MOREX.r2.1HG0018180
HORVU.MOREX.r2.1HG0018200
HORVU.MOREX.r2.1HG0018390
HORVU.MOREX.r2.1HG0018400
HORVU.MOREX.r2.1HG0018440
HORVU.MOREX.r2.1HG0018460
HORVU.MOREX.r2.1HG0018500
HORVU.MOREX.r2.1HG0018520
HORVU.MOREX.r2.1HG0018750
HORVU.MOREX.r2.1HG0018760
HORVU.MOREX.r2.1HG0018770
HORVU.MOREX.r2.1HG0018790
HORVU.MOREX.r2.1HG0018930
HORVU.MOREX.r2.1HG0019020
HORVU.MOREX.r2.1HG0019040
HORVU.MOREX.r2.1HG0019050
HORVU.MOREX.r2.1HG0019070
HORVU.MOREX.r2.1HG0019110
HORVU.MOREX.r2.1HG0019290
HORVU.MOREX.r2.1HG0019300
HORVU.MOREX.r2.1HG0019390
HORVU.MOREX.r2.1HG0019520
HORVU.MOREX.r2.1HG0019550
HORVU.MOREX.r2.1HG0019570
HORVU.MOREX.r2.1HG0019580
HORVU.MOREX.r2.1HG0019700
HORVU.MOREX.r2.1HG0019710
HORVU.MOREX.r2.1HG0019740
HORVU.MOREX.r2.1HG0019760
HORVU.MOREX.r2.1HG0019860
HORVU.MOREX.r2.1HG0019910
HORVU.MOREX.r2.1HG0019930
HORVU.MOREX.r2.1HG0019970
HORVU.MOREX.r2.1HG0020240
HORVU.MOREX.r2.1HG0020380
HORVU.MOREX.r2.1HG0020460
HORVU.MOREX.r2.1HG0020490
HORVU.MOREX.r2.1HG0020500
HORVU.MOREX.r2.1HG0020560
HORVU.MOREX.r2.1HG0020600
HORVU.MOREX.r2.1HG0020620
HORVU.MOREX.r2.1HG0020640
HORVU.MOREX.r2.1HG0020650
HORVU.MOREX.r2.1HG0020950
HORVU.MOREX.r2.1HG0020970
HORVU.MOREX.r2.1HG0021070
HORVU.MOREX.r2.1HG0021120
HORVU.MOREX.r2.1HG0021190
HORVU.MOREX.r2.1HG0021200
HORVU.MOREX.r2.1HG0021210
HORVU.MOREX.r2.1HG0021230
HORVU.MOREX.r2.1HG0021380
[truncated: 25,175 more rows]

## Sheet: Table S3 M2 H3K4me3
Table S3. Genes marked with H3K4me3 in M2
HORVU.MOREX.r2.1HG0000020
HORVU.MOREX.r2.1HG0000030
HORVU.MOREX.r2.1HG0000040
HORVU.MOREX.r2.1HG0000080
HORVU.MOREX.r2.1HG0000090
HORVU.MOREX.r2.1HG0000280
HORVU.MOREX.r2.1HG0000580
HORVU.MOREX.r2.1HG0000590
HORVU.MOREX.r2.1HG0000640
HORVU.MOREX.r2.1HG0000740
HORVU.MOREX.r2.1HG0001140
HORVU.MOREX.r2.1HG0001540
HORVU.MOREX.r2.1HG0001690
HORVU.MOREX.r2.1HG0001710
HORVU.MOREX.r2.1HG0001720
HORVU.MOREX.r2.1HG0001800
HORVU.MOREX.r2.1HG0001830
HORVU.MOREX.r2.1HG0001890
HORVU.MOREX.r2.1HG0001910
HORVU.MOREX.r2.1HG0001920
HORVU.MOREX.r2.1HG0001940
HORVU.MOREX.r2.1HG0002020
HORVU.MOREX.r2.1HG0002190
HORVU.MOREX.r2.1HG0002210
HORVU.MOREX.r2.1HG0002230
HORVU.MOREX.r2.1HG0002350
HORVU.MOREX.r2.1HG0002750
HORVU.MOREX.r2.1HG0002840
HORVU.MOREX.r2.1HG0002870
HORVU.MOREX.r2.1HG0002940
HORVU.MOREX.r2.1HG0003010
HORVU.MOREX.r2.1HG0003040
HORVU.MOREX.r2.1HG0003220
HORVU.MOREX.r2.1HG0003270
HORVU.MOREX.r2.1HG0003310
HORVU.MOREX.r2.1HG0003400
HORVU.MOREX.r2.1HG0003480
HORVU.MOREX.r2.1HG0003500
HORVU.MOREX.r2.1HG0003540
HORVU.MOREX.r2.1HG0003590
HORVU.MOREX.r2.1HG0003610
HORVU.MOREX.r2.1HG0003630
HORVU.MOREX.r2.1HG0003690
HORVU.MOREX.r2.1HG0003740
HORVU.MOREX.r2.1HG0003770
HORVU.MOREX.r2.1HG0003890
HORVU.MOREX.r2.1HG0003900
HORVU.MOREX.r2.1HG0003910
HORVU.MOREX.r2.1HG0003920
HORVU.MOREX.r2.1HG0004050
HORVU.MOREX.r2.1HG0004060
HORVU.MOREX.r2.1HG0004200
HORVU.MOREX.r2.1HG0004230
HORVU.MOREX.r2.1HG0004380
HORVU.MOREX.r2.1HG0004420
HORVU.MOREX.r2.1HG0004480
HORVU.MOREX.r2.1HG0004550
HORVU.MOREX.r2.1HG0004620
HORVU.MOREX.r2.1HG0004690
HORVU.MOREX.r2.1HG0004810
HORVU.MOREX.r2.1HG0004930
HORVU.MOREX.r2.1HG0004960
HORVU.MOREX.r2.1HG0005080
HORVU.MOREX.r2.1HG0005300
HORVU.MOREX.r2.1HG0005340
HORVU.MOREX.r2.1HG0005360
HORVU.MOREX.r2.1HG0005370
HORVU.MOREX.r2.1HG0005380
HORVU.MOREX.r2.1HG0005390
HORVU.MOREX.r2.1HG0005440
HORVU.MOREX.r2.1HG0005570
HORVU.MOREX.r2.1HG0005650
HORVU.MOREX.r2.1HG0005850
HORVU.MOREX.r2.1HG0006020
HORVU.MOREX.r2.1HG0006240
HORVU.MOREX.r2.1HG0006250
HORVU.MOREX.r2.1HG0006280
HORVU.MOREX.r2.1HG0006290
HORVU.MOREX.r2.1HG0006340
HORVU.MOREX.r2.1HG0006450
HORVU.MOREX.r2.1HG0006570
HORVU.MOREX.r2.1HG0006620
HORVU.MOREX.r2.1HG0006660
HORVU.MOREX.r2.1HG0006800
HORVU.MOREX.r2.1HG0006810
HORVU.MOREX.r2.1HG0006820
HORVU.MOREX.r2.1HG0007020
HORVU.MOREX.r2.1HG0007050
HORVU.MOREX.r2.1HG0007070
HORVU.MOREX.r2.1HG0007110
HORVU.MOREX.r2.1HG0007190
HORVU.MOREX.r2.1HG0007200
HORVU.MOREX.r2.1HG0007300
HORVU.MOREX.r2.1HG0007410
HORVU.MOREX.r2.1HG0007480
HORVU.MOREX.r2.1HG0007520
HORVU.MOREX.r2.1HG0007540
HORVU.MOREX.r2.1HG0007630
HORVU.MOREX.r2.1HG0007760
HORVU.MOREX.r2.1HG0007840
HORVU.MOREX.r2.1HG0007850
HORVU.MOREX.r2.1HG0008250
HORVU.MOREX.r2.1HG0008330
HORVU.MOREX.r2.1HG0008390
HORVU.MOREX.r2.1HG0008410
HORVU.MOREX.r2.1HG0008430
HORVU.MOREX.r2.1HG0008450
HORVU.MOREX.r2.1HG0008510
HORVU.MOREX.r2.1HG0008570
HORVU.MOREX.r2.1HG0008580
HORVU.MOREX.r2.1HG0008630
HORVU.MOREX.r2.1HG0008650
HORVU.MOREX.r2.1HG0008710
HORVU.MOREX.r2.1HG0008730
HORVU.MOREX.r2.1HG0008760
HORVU.MOREX.r2.1HG0008810
HORVU.MOREX.r2.1HG0008840
HORVU.MOREX.r2.1HG0008950
HORVU.MOREX.r2.1HG0009000
HORVU.MOREX.r2.1HG0009050
HORVU.MOREX.r2.1HG0009110
HORVU.MOREX.r2.1HG0009170
HORVU.MOREX.r2.1HG0009180
HORVU.MOREX.r2.1HG0009290
HORVU.MOREX.r2.1HG0009320
HORVU.MOREX.r2.1HG0009530
HORVU.MOREX.r2.1HG0009560
HORVU.MOREX.r2.1HG0009680
HORVU.MOREX.r2.1HG0009910
HORVU.MOREX.r2.1HG0009940
HORVU.MOREX.r2.1HG0009950
HORVU.MOREX.r2.1HG0010050
HORVU.MOREX.r2.1HG0010060
HORVU.MOREX.r2.1HG0010080
HORVU.MOREX.r2.1HG0010150
HORVU.MOREX.r2.1HG0010170
HORVU.MOREX.r2.1HG0010390
HORVU.MOREX.r2.1HG0010410
HORVU.MOREX.r2.1HG0010500
HORVU.MOREX.r2.1HG0010520
HORVU.MOREX.r2.1HG0010660
HORVU.MOREX.r2.1HG0010850
HORVU.MOREX.r2.1HG0010970
HORVU.MOREX.r2.1HG0010990
HORVU.MOREX.r2.1HG0011080
HORVU.MOREX.r2.1HG0011090
HORVU.MOREX.r2.1HG0011100
HORVU.MOREX.r2.1HG0011160
HORVU.MOREX.r2.1HG0011190
HORVU.MOREX.r2.1HG0011220
HORVU.MOREX.r2.1HG0011240
HORVU.MOREX.r2.1HG0011250
HORVU.MOREX.r2.1HG0011520
HORVU.MOREX.r2.1HG0011720
HORVU.MOREX.r2.1HG0011940
HORVU.MOREX.r2.1HG0012070
HORVU.MOREX.r2.1HG0012160
HORVU.MOREX.r2.1HG0012220
HORVU.MOREX.r2.1HG0012240
HORVU.MOREX.r2.1HG0012340
HORVU.MOREX.r2.1HG0012450
HORVU.MOREX.r2.1HG0012500
HORVU.MOREX.r2.1HG0012650
HORVU.MOREX.r2.1HG0012680
HORVU.MOREX.r2.1HG0012790
HORVU.MOREX.r2.1HG0012800
HORVU.MOREX.r2.1HG0012840
HORVU.MOREX.r2.1HG0012920
HORVU.MOREX.r2.1HG0012930
HORVU.MOREX.r2.1HG0012980
HORVU.MOREX.r2.1HG0012990
HORVU.MOREX.r2.1HG0013310
HORVU.MOREX.r2.1HG0013470
HORVU.MOREX.r2.1HG0013490
HORVU.MOREX.r2.1HG0013570
HORVU.MOREX.r2.1HG0013640
HORVU.MOREX.r2.1HG0013680
HORVU.MOREX.r2.1HG0013760
HORVU.MOREX.r2.1HG0013780
HORVU.MOREX.r2.1HG0013990
HORVU.MOREX.r2.1HG0014060
HORVU.MOREX.r2.1HG0014080
HORVU.MOREX.r2.1HG0014100
HORVU.MOREX.r2.1HG0014110
HORVU.MOREX.r2.1HG0014120
HORVU.MOREX.r2.1HG0014170
HORVU.MOREX.r2.1HG0014190
HORVU.MOREX.r2.1HG0014420
HORVU.MOREX.r2.1HG0014490
HORVU.MOREX.r2.1HG0014550
HORVU.MOREX.r2.1HG0014610
HORVU.MOREX.r2.1HG0014870
HORVU.MOREX.r2.1HG0015010
HORVU.MOREX.r2.1HG0015060
HORVU.MOREX.r2.1HG0015100
HORVU.MOREX.r2.1HG0015120
HORVU.MOREX.r2.1HG0015150
HORVU.MOREX.r2.1HG0015160
HORVU.MOREX.r2.1HG0015170
HORVU.MOREX.r2.1HG0015250
HORVU.MOREX.r2.1HG0015580
HORVU.MOREX.r2.1HG0015720
HORVU.MOREX.r2.1HG0015840
HORVU.MOREX.r2.1HG0015870
HORVU.MOREX.r2.1HG0015920
HORVU.MOREX.r2.1HG0016020
HORVU.MOREX.r2.1HG0016060
HORVU.MOREX.r2.1HG0016130
HORVU.MOREX.r2.1HG0016200
HORVU.MOREX.r2.1HG0016280
HORVU.MOREX.r2.1HG0016320
HORVU.MOREX.r2.1HG0016340
HORVU.MOREX.r2.1HG0016410
HORVU.MOREX.r2.1HG0016510
HORVU.MOREX.r2.1HG0016570
HORVU.MOREX.r2.1HG0016640
HORVU.MOREX.r2.1HG0016740
HORVU.MOREX.r2.1HG0016770
HORVU.MOREX.r2.1HG0016780
HORVU.MOREX.r2.1HG0016800
HORVU.MOREX.r2.1HG0016860
HORVU.MOREX.r2.1HG0016900
HORVU.MOREX.r2.1HG0017050
HORVU.MOREX.r2.1HG0017110
HORVU.MOREX.r2.1HG0017180
HORVU.MOREX.r2.1HG0017220
HORVU.MOREX.r2.1HG0017310
HORVU.MOREX.r2.1HG0017390
HORVU.MOREX.r2.1HG0017400
HORVU.MOREX.r2.1HG0017490
HORVU.MOREX.r2.1HG0017530
HORVU.MOREX.r2.1HG0017670
HORVU.MOREX.r2.1HG0017750
HORVU.MOREX.r2.1HG0017810
HORVU.MOREX.r2.1HG0017880
HORVU.MOREX.r2.1HG0017890
HORVU.MOREX.r2.1HG0017990
HORVU.MOREX.r2.1HG0018080
HORVU.MOREX.r2.1HG0018170
HORVU.MOREX.r2.1HG0018310
HORVU.MOREX.r2.1HG0018560
HORVU.MOREX.r2.1HG0018580
HORVU.MOREX.r2.1HG0018630
HORVU.MOREX.r2.1HG0018640
HORVU.MOREX.r2.1HG0018700
HORVU.MOREX.r2.1HG0018740
HORVU.MOREX.r2.1HG0018780
HORVU.MOREX.r2.1HG0018800
HORVU.MOREX.r2.1HG0018830
HORVU.MOREX.r2.1HG0018850
HORVU.MOREX.r2.1HG0018860
HORVU.MOREX.r2.1HG0018900
HORVU.MOREX.r2.1HG0018910
HORVU.MOREX.r2.1HG0018950
HORVU.MOREX.r2.1HG0018960
HORVU.MOREX.r2.1HG0018970
HORVU.MOREX.r2.1HG0019030
HORVU.MOREX.r2.1HG0019090
HORVU.MOREX.r2.1HG0019100
HORVU.MOREX.r2.1HG0019120
HORVU.MOREX.r2.1HG0019150
HORVU.MOREX.r2.1HG0019210
HORVU.MOREX.r2.1HG0019270
HORVU.MOREX.r2.1HG0019280
HORVU.MOREX.r2.1HG0019310
HORVU.MOREX.r2.1HG0019400
HORVU.MOREX.r2.1HG0019410
HORVU.MOREX.r2.1HG0019450
HORVU.MOREX.r2.1HG0019510
HORVU.MOREX.r2.1HG0019560
HORVU.MOREX.r2.1HG0019660
HORVU.MOREX.r2.1HG0019680
HORVU.MOREX.r2.1HG0019780
HORVU.MOREX.r2.1HG0019790
HORVU.MOREX.r2.1HG0020140
HORVU.MOREX.r2.1HG0020280
HORVU.MOREX.r2.1HG0020310
HORVU.MOREX.r2.1HG0020320
HORVU.MOREX.r2.1HG0020410
HORVU.MOREX.r2.1HG0020430
HORVU.MOREX.r2.1HG0020470
HORVU.MOREX.r2.1HG0020540
HORVU.MOREX.r2.1HG0020610
HORVU.MOREX.r2.1HG0020680
HORVU.MOREX.r2.1HG0020750
HORVU.MOREX.r2.1HG0020770
HORVU.MOREX.r2.1HG0020800
HORVU.MOREX.r2.1HG0020910
HORVU.MOREX.r2.1HG0020920
HORVU.MOREX.r2.1HG0021150
HORVU.MOREX.r2.1HG0021270
HORVU.MOREX.r2.1HG0021280
HORVU.MOREX.r2.1HG0021310
HORVU.MOREX.r2.1HG0021320
HORVU.MOREX.r2.1HG0021340
HORVU.MOREX.r2.1HG0021370
HORVU.MOREX.r2.1HG0021410
HORVU.MOREX.r2.1HG0021430
HORVU.MOREX.r2.1HG0021490
HORVU.MOREX.r2.1HG0021500
HORVU.MOREX.r2.1HG0021540
HORVU.MOREX.r2.1HG0021590
HORVU.MOREX.r2.1HG0021680
HORVU.MOREX.r2.1HG0021740
HORVU.MOREX.r2.1HG0021810
HORVU.MOREX.r2.1HG0021840
HORVU.MOREX.r2.1HG0021920
HORVU.MOREX.r2.1HG0021970
HORVU.MOREX.r2.1HG0021990
HORVU.MOREX.r2.1HG0022070
HORVU.MOREX.r2.1HG0022090
HORVU.MOREX.r2.1HG0022310
HORVU.MOREX.r2.1HG0022330
HORVU.MOREX.r2.1HG0022950
HORVU.MOREX.r2.1HG0022960
HORVU.MOREX.r2.1HG0022990
HORVU.MOREX.r2.1HG0023130
HORVU.MOREX.r2.1HG0023170
HORVU.MOREX.r2.1HG0023260
HORVU.MOREX.r2.1HG0023280
HORVU.MOREX.r2.1HG0023330
HORVU.MOREX.r2.1HG0023480
HORVU.MOREX.r2.1HG0023530
HORVU.MOREX.r2.1HG0023540
HORVU.MOREX.r2.1HG0023650
HORVU.MOREX.r2.1HG0023790
HORVU.MOREX.r2.1HG0023830
HORVU.MOREX.r2.1HG0023880
HORVU.MOREX.r2.1HG0023940
HORVU.MOREX.r2.1HG0023950
HORVU.MOREX.r2.1HG0024060
HORVU.MOREX.r2.1HG0024080
HORVU.MOREX.r2.1HG0024140
HORVU.MOREX.r2.1HG0024500
HORVU.MOREX.r2.1HG0024540
HORVU.MOREX.r2.1HG0024590
HORVU.MOREX.r2.1HG0024610
HORVU.MOREX.r2.1HG0024620
HORVU.MOREX.r2.1HG0024940
HORVU.MOREX.r2.1HG0025060
HORVU.MOREX.r2.1HG0025140
HORVU.MOREX.r2.1HG0025150
HORVU.MOREX.r2.1HG0025240
HORVU.MOREX.r2.1HG0025250
HORVU.MOREX.r2.1HG0025280
HORVU.MOREX.r2.1HG0025300
HORVU.MOREX.r2.1HG0025320
HORVU.MOREX.r2.1HG0025340
HORVU.MOREX.r2.1HG0025370
HORVU.MOREX.r2.1HG0025620
HORVU.MOREX.r2.1HG0025820
HORVU.MOREX.r2.1HG0025840
HORVU.MOREX.r2.1HG0025850
HORVU.MOREX.r2.1HG0025890
HORVU.MOREX.r2.1HG0026180
HORVU.MOREX.r2.1HG0026230
HORVU.MOREX.r2.1HG0026290
HORVU.MOREX.r2.1HG0026410
HORVU.MOREX.r2.1HG0026430
HORVU.MOREX.r2.1HG0026490
HORVU.MOREX.r2.1HG0026520
HORVU.MOREX.r2.1HG0026590
HORVU.MOREX.r2.1HG0026700
HORVU.MOREX.r2.1HG0026750
HORVU.MOREX.r2.1HG0026820
HORVU.MOREX.r2.1HG0026900
HORVU.MOREX.r2.1HG0026930
HORVU.MOREX.r2.1HG0026950
HORVU.MOREX.r2.1HG0027030
HORVU.MOREX.r2.1HG0027120
HORVU.MOREX.r2.1HG0027260
HORVU.MOREX.r2.1HG0027280
HORVU.MOREX.r2.1HG0027380
HORVU.MOREX.r2.1HG0027480
HORVU.MOREX.r2.1HG0027640
HORVU.MOREX.r2.1HG0027750
HORVU.MOREX.r2.1HG0028090
HORVU.MOREX.r2.1HG0028170
HORVU.MOREX.r2.1HG0028200
HORVU.MOREX.r2.1HG0028230
HORVU.MOREX.r2.1HG0028340
HORVU.MOREX.r2.1HG0028440
HORVU.MOREX.r2.1HG0028560
HORVU.MOREX.r2.1HG0028570
HORVU.MOREX.r2.1HG0028590
HORVU.MOREX.r2.1HG0028630
HORVU.MOREX.r2.1HG0028650
HORVU.MOREX.r2.1HG0028710
HORVU.MOREX.r2.1HG0028720
HORVU.MOREX.r2.1HG0028770
HORVU.MOREX.r2.1HG0028790
HORVU.MOREX.r2.1HG0029110
HORVU.MOREX.r2.1HG0029160
HORVU.MOREX.r2.1HG0029240
HORVU.MOREX.r2.1HG0029360
HORVU.MOREX.r2.1HG0029410
HORVU.MOREX.r2.1HG0029420
HORVU.MOREX.r2.1HG0029450
HORVU.MOREX.r2.1HG0029460
HORVU.MOREX.r2.1HG0029500
HORVU.MOREX.r2.1HG0029540
HORVU.MOREX.r2.1HG0029910
HORVU.MOREX.r2.1HG0029920
HORVU.MOREX.r2.1HG0029940
HORVU.MOREX.r2.1HG0029960
HORVU.MOREX.r2.1HG0029970
HORVU.MOREX.r2.1HG0030160
HORVU.MOREX.r2.1HG0030190
HORVU.MOREX.r2.1HG0030220
HORVU.MOREX.r2.1HG0030230
HORVU.MOREX.r2.1HG0030250
HORVU.MOREX.r2.1HG0030270
HORVU.MOREX.r2.1HG0030300
HORVU.MOREX.r2.1HG0030350
HORVU.MOREX.r2.1HG0030360
HORVU.MOREX.r2.1HG0030460
HORVU.MOREX.r2.1HG0030470
HORVU.MOREX.r2.1HG0030490
HORVU.MOREX.r2.1HG0030920
HORVU.MOREX.r2.1HG0031000
HORVU.MOREX.r2.1HG0031030
HORVU.MOREX.r2.1HG0031080
HORVU.MOREX.r2.1HG0031180
HORVU.MOREX.r2.1HG0031450
HORVU.MOREX.r2.1HG0031470
HORVU.MOREX.r2.1HG0031510
HORVU.MOREX.r2.1HG0031580
HORVU.MOREX.r2.1HG0031690
HORVU.MOREX.r2.1HG0031760
HORVU.MOREX.r2.1HG0031810
HORVU.MOREX.r2.1HG0031860
HORVU.MOREX.r2.1HG0031880
HORVU.MOREX.r2.1HG0031900
HORVU.MOREX.r2.1HG0031930
HORVU.MOREX.r2.1HG0031950
HORVU.MOREX.r2.1HG0031960
HORVU.MOREX.r2.1HG0031970
HORVU.MOREX.r2.1HG0032060
HORVU.MOREX.r2.1HG0032070
HORVU.MOREX.r2.1HG0032080
HORVU.MOREX.r2.1HG0032340
HORVU.MOREX.r2.1HG0032390
HORVU.MOREX.r2.1HG0032420
HORVU.MOREX.r2.1HG0032520
HORVU.MOREX.r2.1HG0032590
HORVU.MOREX.r2.1HG0032660
HORVU.MOREX.r2.1HG0032680
HORVU.MOREX.r2.1HG0032830
HORVU.MOREX.r2.1HG0032850
HORVU.MOREX.r2.1HG0032940
HORVU.MOREX.r2.1HG0033090
HORVU.MOREX.r2.1HG0033100
HORVU.MOREX.r2.1HG0033150
HORVU.MOREX.r2.1HG0033270
HORVU.MOREX.r2.1HG0033380
HORVU.MOREX.r2.1HG0033390
HORVU.MOREX.r2.1HG0033460
HORVU.MOREX.r2.1HG0033510
HORVU.MOREX.r2.1HG0033530
HORVU.MOREX.r2.1HG0033550
HORVU.MOREX.r2.1HG0033580
HORVU.MOREX.r2.1HG0033690
HORVU.MOREX.r2.1HG0033750
HORVU.MOREX.r2.1HG0033800
HORVU.MOREX.r2.1HG0033810
HORVU.MOREX.r2.1HG0033830
HORVU.MOREX.r2.1HG0033860
HORVU.MOREX.r2.1HG0033880
HORVU.MOREX.r2.1HG0033970
HORVU.MOREX.r2.1HG0034150
HORVU.MOREX.r2.1HG0034160
HORVU.MOREX.r2.1HG0034220
HORVU.MOREX.r2.1HG0034250
HORVU.MOREX.r2.1HG0034280
HORVU.MOREX.r2.1HG0034530
HORVU.MOREX.r2.1HG0034630
HORVU.MOREX.r2.1HG0034740
HORVU.MOREX.r2.1HG0034750
HORVU.MOREX.r2.1HG0034790
HORVU.MOREX.r2.1HG0034800
HORVU.MOREX.r2.1HG0034980
HORVU.MOREX.r2.1HG0034990
HORVU.MOREX.r2.1HG0035040
HORVU.MOREX.r2.1HG0035050
HORVU.MOREX.r2.1HG0035260
HORVU.MOREX.r2.1HG0035290
HORVU.MOREX.r2.1HG0035340
HORVU.MOREX.r2.1HG0035490
HORVU.MOREX.r2.1HG0035540
HORVU.MOREX.r2.1HG0035590
HORVU.MOREX.r2.1HG0035670
HORVU.MOREX.r2.1HG0035690
HORVU.MOREX.r2.1HG0035720
HORVU.MOREX.r2.1HG0035800
HORVU.MOREX.r2.1HG0035920
HORVU.MOREX.r2.1HG0035950
HORVU.MOREX.r2.1HG0036020
HORVU.MOREX.r2.1HG0036120
HORVU.MOREX.r2.1HG0036150
HORVU.MOREX.r2.1HG0036160
HORVU.MOREX.r2.1HG0036210
HORVU.MOREX.r2.1HG0036230
HORVU.MOREX.r2.1HG0036360
HORVU.MOREX.r2.1HG0036380
HORVU.MOREX.r2.1HG0036440
HORVU.MOREX.r2.1HG0036500
HORVU.MOREX.r2.1HG0036610
HORVU.MOREX.r2.1HG0036710
HORVU.MOREX.r2.1HG0036730
HORVU.MOREX.r2.1HG0036740
HORVU.MOREX.r2.1HG0036750
HORVU.MOREX.r2.1HG0036810
HORVU.MOREX.r2.1HG0036820
HORVU.MOREX.r2.1HG0036860
HORVU.MOREX.r2.1HG0036910
HORVU.MOREX.r2.1HG0036980
HORVU.MOREX.r2.1HG0036990
HORVU.MOREX.r2.1HG0037040
HORVU.MOREX.r2.1HG0037050
HORVU.MOREX.r2.1HG0037070
HORVU.MOREX.r2.1HG0037100
HORVU.MOREX.r2.1HG0037110
HORVU.MOREX.r2.1HG0037120
HORVU.MOREX.r2.1HG0037130
HORVU.MOREX.r2.1HG0037190
HORVU.MOREX.r2.1HG0037240
HORVU.MOREX.r2.1HG0037280
HORVU.MOREX.r2.1HG0037360
HORVU.MOREX.r2.1HG0037520
HORVU.MOREX.r2.1HG0037530
HORVU.MOREX.r2.1HG0037550
HORVU.MOREX.r2.1HG0037610
HORVU.MOREX.r2.1HG0037640
HORVU.MOREX.r2.1HG0037750
HORVU.MOREX.r2.1HG0037760
HORVU.MOREX.r2.1HG0037790
HORVU.MOREX.r2.1HG0037990
HORVU.MOREX.r2.1HG0038050
HORVU.MOREX.r2.1HG0038240
HORVU.MOREX.r2.1HG0038260
HORVU.MOREX.r2.1HG0038310
HORVU.MOREX.r2.1HG0038340
HORVU.MOREX.r2.1HG0038400
HORVU.MOREX.r2.1HG0038570
HORVU.MOREX.r2.1HG0038580
HORVU.MOREX.r2.1HG0038600
HORVU.MOREX.r2.1HG0038710
HORVU.MOREX.r2.1HG0038720
HORVU.MOREX.r2.1HG0038730
HORVU.MOREX.r2.1HG0038750
HORVU.MOREX.r2.1HG0038760
HORVU.MOREX.r2.1HG0038790
HORVU.MOREX.r2.1HG0038930
HORVU.MOREX.r2.1HG0038950
HORVU.MOREX.r2.1HG0038960
HORVU.MOREX.r2.1HG0039050
HORVU.MOREX.r2.1HG0039060
HORVU.MOREX.r2.1HG0039110
HORVU.MOREX.r2.1HG0039170
HORVU.MOREX.r2.1HG0039290
HORVU.MOREX.r2.1HG0039520
HORVU.MOREX.r2.1HG0039540
HORVU.MOREX.r2.1HG0039580
HORVU.MOREX.r2.1HG0039600
HORVU.MOREX.r2.1HG0039690
HORVU.MOREX.r2.1HG0039730
HORVU.MOREX.r2.1HG0039830
HORVU.MOREX.r2.1HG0039850
HORVU.MOREX.r2.1HG0039970
HORVU.MOREX.r2.1HG0040060
HORVU.MOREX.r2.1HG0040070
HORVU.MOREX.r2.1HG0040100
HORVU.MOREX.r2.1HG0040130
HORVU.MOREX.r2.1HG0040290
HORVU.MOREX.r2.1HG0040300
HORVU.MOREX.r2.1HG0040330
HORVU.MOREX.r2.1HG0040480
HORVU.MOREX.r2.1HG0040490
HORVU.MOREX.r2.1HG0040510
HORVU.MOREX.r2.1HG0040530
HORVU.MOREX.r2.1HG0040620
HORVU.MOREX.r2.1HG0040650
HORVU.MOREX.r2.1HG0040660
HORVU.MOREX.r2.1HG0040680
HORVU.MOREX.r2.1HG0040700
HORVU.MOREX.r2.1HG0040710
HORVU.MOREX.r2.1HG0040730
HORVU.MOREX.r2.1HG0040790
HORVU.MOREX.r2.1HG0040840
HORVU.MOREX.r2.1HG0040860
HORVU.MOREX.r2.1HG0040870
HORVU.MOREX.r2.1HG0040930
HORVU.MOREX.r2.1HG0040940
HORVU.MOREX.r2.1HG0040990
HORVU.MOREX.r2.1HG0041030
HORVU.MOREX.r2.1HG0041270
HORVU.MOREX.r2.1HG0041280
HORVU.MOREX.r2.1HG0041290
HORVU.MOREX.r2.1HG0041310
HORVU.MOREX.r2.1HG0041360
HORVU.MOREX.r2.1HG0041590
HORVU.MOREX.r2.1HG0041600
HORVU.MOREX.r2.1HG0041620
HORVU.MOREX.r2.1HG0041680
HORVU.MOREX.r2.1HG0041730
HORVU.MOREX.r2.1HG0041740
HORVU.MOREX.r2.1HG0041760
HORVU.MOREX.r2.1HG0041820
HORVU.MOREX.r2.1HG0041850
HORVU.MOREX.r2.1HG0041940
HORVU.MOREX.r2.1HG0041990
HORVU.MOREX.r2.1HG0042000
HORVU.MOREX.r2.1HG0042090
HORVU.MOREX.r2.1HG0042120
HORVU.MOREX.r2.1HG0042170
HORVU.MOREX.r2.1HG0042220
HORVU.MOREX.r2.1HG0042230
HORVU.MOREX.r2.1HG0042240
HORVU.MOREX.r2.1HG0042250
HORVU.MOREX.r2.1HG0042280
HORVU.MOREX.r2.1HG0042300
HORVU.MOREX.r2.1HG0042330
HORVU.MOREX.r2.1HG0042340
HORVU.MOREX.r2.1HG0042460
HORVU.MOREX.r2.1HG0042470
HORVU.MOREX.r2.1HG0042550
HORVU.MOREX.r2.1HG0042580
HORVU.MOREX.r2.1HG0042660
HORVU.MOREX.r2.1HG0042700
HORVU.MOREX.r2.1HG0042770
HORVU.MOREX.r2.1HG0042810
HORVU.MOREX.r2.1HG0042830
HORVU.MOREX.r2.1HG0042930
HORVU.MOREX.r2.1HG0043040
HORVU.MOREX.r2.1HG0043060
HORVU.MOREX.r2.1HG0043070
HORVU.MOREX.r2.1HG0043190
HORVU.MOREX.r2.1HG0043200
HORVU.MOREX.r2.1HG0043280
HORVU.MOREX.r2.1HG0043460
HORVU.MOREX.r2.1HG0043480
HORVU.MOREX.r2.1HG0043550
HORVU.MOREX.r2.1HG0043580
HORVU.MOREX.r2.1HG0043590
HORVU.MOREX.r2.1HG0043620
HORVU.MOREX.r2.1HG0043640
HORVU.MOREX.r2.1HG0043650
HORVU.MOREX.r2.1HG0043660
HORVU.MOREX.r2.1HG0043680
HORVU.MOREX.r2.1HG0043710
HORVU.MOREX.r2.1HG0043720
HORVU.MOREX.r2.1HG0043730
HORVU.MOREX.r2.1HG0043750
HORVU.MOREX.r2.1HG0043780
HORVU.MOREX.r2.1HG0043830
HORVU.MOREX.r2.1HG0043920
HORVU.MOREX.r2.1HG0043930
HORVU.MOREX.r2.1HG0043940
HORVU.MOREX.r2.1HG0044030
HORVU.MOREX.r2.1HG0044040
HORVU.MOREX.r2.1HG0044090
HORVU.MOREX.r2.1HG0044100
HORVU.MOREX.r2.1HG0044190
HORVU.MOREX.r2.1HG0044400
HORVU.MOREX.r2.1HG0044430
HORVU.MOREX.r2.1HG0044440
HORVU.MOREX.r2.1HG0044460
HORVU.MOREX.r2.1HG0044540
HORVU.MOREX.r2.1HG0044560
HORVU.MOREX.r2.1HG0044600
HORVU.MOREX.r2.1HG0044660
HORVU.MOREX.r2.1HG0044730
HORVU.MOREX.r2.1HG0044770
HORVU.MOREX.r2.1HG0044800
HORVU.MOREX.r2.1HG0044820
HORVU.MOREX.r2.1HG0044900
HORVU.MOREX.r2.1HG0044970
HORVU.MOREX.r2.1HG0045220
HORVU.MOREX.r2.1HG0045240
HORVU.MOREX.r2.1HG0045410
HORVU.MOREX.r2.1HG0045440
HORVU.MOREX.r2.1HG0045480
HORVU.MOREX.r2.1HG0045500
HORVU.MOREX.r2.1HG0045540
HORVU.MOREX.r2.1HG0045610
HORVU.MOREX.r2.1HG0045620
HORVU.MOREX.r2.1HG0045750
HORVU.MOREX.r2.1HG0045760
HORVU.MOREX.r2.1HG0045800
HORVU.MOREX.r2.1HG0045810
HORVU.MOREX.r2.1HG0045820
HORVU.MOREX.r2.1HG0045850
HORVU.MOREX.r2.1HG0045870
HORVU.MOREX.r2.1HG0045890
HORVU.MOREX.r2.1HG0045910
HORVU.MOREX.r2.1HG0045960
HORVU.MOREX.r2.1HG0046030
HORVU.MOREX.r2.1HG0046050
HORVU.MOREX.r2.1HG0046060
HORVU.MOREX.r2.1HG0046160
HORVU.MOREX.r2.1HG0046180
HORVU.MOREX.r2.1HG0046190
HORVU.MOREX.r2.1HG0046210
HORVU.MOREX.r2.1HG0046260
HORVU.MOREX.r2.1HG0046350
HORVU.MOREX.r2.1HG0046370
HORVU.MOREX.r2.1HG0046540
HORVU.MOREX.r2.1HG0046640
HORVU.MOREX.r2.1HG0046700
HORVU.MOREX.r2.1HG0046710
HORVU.MOREX.r2.1HG0046720
HORVU.MOREX.r2.1HG0046800
HORVU.MOREX.r2.1HG0046820
HORVU.MOREX.r2.1HG0046830
HORVU.MOREX.r2.1HG0046850
HORVU.MOREX.r2.1HG0046880
HORVU.MOREX.r2.1HG0046900
HORVU.MOREX.r2.1HG0046990
HORVU.MOREX.r2.1HG0047000
HORVU.MOREX.r2.1HG0047040
HORVU.MOREX.r2.1HG0047050
HORVU.MOREX.r2.1HG0047060
HORVU.MOREX.r2.1HG0047070
HORVU.MOREX.r2.1HG0047090
HORVU.MOREX.r2.1HG0047110
HORVU.MOREX.r2.1HG0047120
HORVU.MOREX.r2.1HG0047130
HORVU.MOREX.r2.1HG0047240
HORVU.MOREX.r2.1HG0047440
HORVU.MOREX.r2.1HG0047460
HORVU.MOREX.r2.1HG0047520
HORVU.MOREX.r2.1HG0047540
HORVU.MOREX.r2.1HG0047610
HORVU.MOREX.r2.1HG0047650
HORVU.MOREX.r2.1HG0047750
HORVU.MOREX.r2.1HG0047810
HORVU.MOREX.r2.1HG0047820
HORVU.MOREX.r2.1HG0047940
HORVU.MOREX.r2.1HG0047960
HORVU.MOREX.r2.1HG0047970
HORVU.MOREX.r2.1HG0048070
HORVU.MOREX.r2.1HG0048240
HORVU.MOREX.r2.1HG0048290
HORVU.MOREX.r2.1HG0048300
HORVU.MOREX.r2.1HG0048510
HORVU.MOREX.r2.1HG0048520
HORVU.MOREX.r2.1HG0048540
HORVU.MOREX.r2.1HG0048580
HORVU.MOREX.r2.1HG0048610
HORVU.MOREX.r2.1HG0048630
HORVU.MOREX.r2.1HG0048700
HORVU.MOREX.r2.1HG0048780
HORVU.MOREX.r2.1HG0048850
HORVU.MOREX.r2.1HG0048860
HORVU.MOREX.r2.1HG0049020
HORVU.MOREX.r2.1HG0049060
HORVU.MOREX.r2.1HG0049150
HORVU.MOREX.r2.1HG0049170
HORVU.MOREX.r2.1HG0049200
HORVU.MOREX.r2.1HG0049280
HORVU.MOREX.r2.1HG0049310
HORVU.MOREX.r2.1HG0049350
HORVU.MOREX.r2.1HG0049370
HORVU.MOREX.r2.1HG0049440
HORVU.MOREX.r2.1HG0049530
HORVU.MOREX.r2.1HG0049570
HORVU.MOREX.r2.1HG0049650
HORVU.MOREX.r2.1HG0049660
HORVU.MOREX.r2.1HG0049710
HORVU.MOREX.r2.1HG0049750
HORVU.MOREX.r2.1HG0049770
HORVU.MOREX.r2.1HG0049810
HORVU.MOREX.r2.1HG0049880
HORVU.MOREX.r2.1HG0049900
HORVU.MOREX.r2.1HG0049950
HORVU.MOREX.r2.1HG0050000
HORVU.MOREX.r2.1HG0050020
HORVU.MOREX.r2.1HG0050060
HORVU.MOREX.r2.1HG0050080
HORVU.MOREX.r2.1HG0050100
HORVU.MOREX.r2.1HG0050130
HORVU.MOREX.r2.1HG0050150
HORVU.MOREX.r2.1HG0050170
HORVU.MOREX.r2.1HG0050270
HORVU.MOREX.r2.1HG0050340
HORVU.MOREX.r2.1HG0050410
HORVU.MOREX.r2.1HG0050420
HORVU.MOREX.r2.1HG0050430
HORVU.MOREX.r2.1HG0050460
HORVU.MOREX.r2.1HG0050480
HORVU.MOREX.r2.1HG0050500
HORVU.MOREX.r2.1HG0050550
HORVU.MOREX.r2.1HG0050580
HORVU.MOREX.r2.1HG0050610
HORVU.MOREX.r2.1HG0050780
HORVU.MOREX.r2.1HG0050790
HORVU.MOREX.r2.1HG0050800
HORVU.MOREX.r2.1HG0050840
HORVU.MOREX.r2.1HG0050900
HORVU.MOREX.r2.1HG0050980
HORVU.MOREX.r2.1HG0051010
HORVU.MOREX.r2.1HG0051020
HORVU.MOREX.r2.1HG0051030
HORVU.MOREX.r2.1HG0051040
HORVU.MOREX.r2.1HG0051080
HORVU.MOREX.r2.1HG0051160
HORVU.MOREX.r2.1HG0051280
HORVU.MOREX.r2.1HG0051320
HORVU.MOREX.r2.1HG0051410
HORVU.MOREX.r2.1HG0051440
HORVU.MOREX.r2.1HG0051490
HORVU.MOREX.r2.1HG0051570
HORVU.MOREX.r2.1HG0051630
HORVU.MOREX.r2.1HG0051640
HORVU.MOREX.r2.1HG0051650
HORVU.MOREX.r2.1HG0051660
HORVU.MOREX.r2.1HG0051710
HORVU.MOREX.r2.1HG0051720
HORVU.MOREX.r2.1HG0051740
HORVU.MOREX.r2.1HG0051860
HORVU.MOREX.r2.1HG0051920
HORVU.MOREX.r2.1HG0051950
HORVU.MOREX.r2.1HG0052290
HORVU.MOREX.r2.1HG0052310
HORVU.MOREX.r2.1HG0052330
HORVU.MOREX.r2.1HG0052400
HORVU.MOREX.r2.1HG0052410
HORVU.MOREX.r2.1HG0052500
HORVU.MOREX.r2.1HG0052560
HORVU.MOREX.r2.1HG0052590
HORVU.MOREX.r2.1HG0052600
HORVU.MOREX.r2.1HG0052800
HORVU.MOREX.r2.1HG0052830
HORVU.MOREX.r2.1HG0052860
HORVU.MOREX.r2.1HG0052870
HORVU.MOREX.r2.1HG0052920
HORVU.MOREX.r2.1HG0053020
HORVU.MOREX.r2.1HG0053170
HORVU.MOREX.r2.1HG0053180
HORVU.MOREX.r2.1HG0053340
HORVU.MOREX.r2.1HG0053420
HORVU.MOREX.r2.1HG0053440
HORVU.MOREX.r2.1HG0053600
HORVU.MOREX.r2.1HG0053790
HORVU.MOREX.r2.1HG0053840
HORVU.MOREX.r2.1HG0053860
HORVU.MOREX.r2.1HG0053890
HORVU.MOREX.r2.1HG0053910
HORVU.MOREX.r2.1HG0053920
HORVU.MOREX.r2.1HG0054160
HORVU.MOREX.r2.1HG0054330
HORVU.MOREX.r2.1HG0054340
HORVU.MOREX.r2.1HG0054360
HORVU.MOREX.r2.1HG0054550
HORVU.MOREX.r2.1HG0054720
HORVU.MOREX.r2.1HG0054750
HORVU.MOREX.r2.1HG0054760
HORVU.MOREX.r2.1HG0054820
HORVU.MOREX.r2.1HG0054850
HORVU.MOREX.r2.1HG0055060
HORVU.MOREX.r2.1HG0055100
HORVU.MOREX.r2.1HG0055140
HORVU.MOREX.r2.1HG0055200
HORVU.MOREX.r2.1HG0055220
HORVU.MOREX.r2.1HG0055240
HORVU.MOREX.r2.1HG0055250
HORVU.MOREX.r2.1HG0055260
HORVU.MOREX.r2.1HG0055450
HORVU.MOREX.r2.1HG0055460
HORVU.MOREX.r2.1HG0055570
HORVU.MOREX.r2.1HG0055720
HORVU.MOREX.r2.1HG0055750
HORVU.MOREX.r2.1HG0055800
HORVU.MOREX.r2.1HG0055860
HORVU.MOREX.r2.1HG0055980
HORVU.MOREX.r2.1HG0056000
HORVU.MOREX.r2.1HG0056030
HORVU.MOREX.r2.1HG0056040
HORVU.MOREX.r2.1HG0056070
HORVU.MOREX.r2.1HG0056090
HORVU.MOREX.r2.1HG0056100
HORVU.MOREX.r2.1HG0056110
HORVU.MOREX.r2.1HG0056140
HORVU.MOREX.r2.1HG0056150
HORVU.MOREX.r2.1HG0056180
HORVU.MOREX.r2.1HG0056240
HORVU.MOREX.r2.1HG0056250
HORVU.MOREX.r2.1HG0056300
HORVU.MOREX.r2.1HG0056320
HORVU.MOREX.r2.1HG0056390
HORVU.MOREX.r2.1HG0056470
HORVU.MOREX.r2.1HG0056500
HORVU.MOREX.r2.1HG0056600
HORVU.MOREX.r2.1HG0056620
HORVU.MOREX.r2.1HG0056630
HORVU.MOREX.r2.1HG0056670
HORVU.MOREX.r2.1HG0056720
HORVU.MOREX.r2.1HG0056790
HORVU.MOREX.r2.1HG0056950
HORVU.MOREX.r2.1HG0057000
HORVU.MOREX.r2.1HG0057020
HORVU.MOREX.r2.1HG0057070
HORVU.MOREX.r2.1HG0057180
HORVU.MOREX.r2.1HG0057260
HORVU.MOREX.r2.1HG0057320
HORVU.MOREX.r2.1HG0057350
HORVU.MOREX.r2.1HG0057360
HORVU.MOREX.r2.1HG0057400
HORVU.MOREX.r2.1HG0057510
HORVU.MOREX.r2.1HG0057520
HORVU.MOREX.r2.1HG0057550
HORVU.MOREX.r2.1HG0057620
HORVU.MOREX.r2.1HG0057630
HORVU.MOREX.r2.1HG0057680
HORVU.MOREX.r2.1HG0057810
HORVU.MOREX.r2.1HG0057820
HORVU.MOREX.r2.1HG0057910
HORVU.MOREX.r2.1HG0057920
HORVU.MOREX.r2.1HG0058030
HORVU.MOREX.r2.1HG0058040
HORVU.MOREX.r2.1HG0058060
HORVU.MOREX.r2.1HG0058180
HORVU.MOREX.r2.1HG0058350
HORVU.MOREX.r2.1HG0058360
HORVU.MOREX.r2.1HG0058430
HORVU.MOREX.r2.1HG0058450
HORVU.MOREX.r2.1HG0058580
HORVU.MOREX.r2.1HG0058590
HORVU.MOREX.r2.1HG0058670
HORVU.MOREX.r2.1HG0058710
HORVU.MOREX.r2.1HG0058750
HORVU.MOREX.r2.1HG0058790
HORVU.MOREX.r2.1HG0058860
HORVU.MOREX.r2.1HG0058890
HORVU.MOREX.r2.1HG0058930
HORVU.MOREX.r2.1HG0058990
HORVU.MOREX.r2.1HG0059020
HORVU.MOREX.r2.1HG0059030
HORVU.MOREX.r2.1HG0059060
HORVU.MOREX.r2.1HG0059090
HORVU.MOREX.r2.1HG0059130
HORVU.MOREX.r2.1HG0059140
HORVU.MOREX.r2.1HG0059150
HORVU.MOREX.r2.1HG0059160
HORVU.MOREX.r2.1HG0059170
HORVU.MOREX.r2.1HG0059200
HORVU.MOREX.r2.1HG0059240
HORVU.MOREX.r2.1HG0059250
HORVU.MOREX.r2.1HG0059260
HORVU.MOREX.r2.1HG0059310
HORVU.MOREX.r2.1HG0059510
HORVU.MOREX.r2.1HG0059540
HORVU.MOREX.r2.1HG0059580
HORVU.MOREX.r2.1HG0059640
HORVU.MOREX.r2.1HG0059650
HORVU.MOREX.r2.1HG0059670
HORVU.MOREX.r2.1HG0059750
HORVU.MOREX.r2.1HG0059770
HORVU.MOREX.r2.1HG0059820
HORVU.MOREX.r2.1HG0059880
HORVU.MOREX.r2.1HG0059890
HORVU.MOREX.r2.1HG0059900
HORVU.MOREX.r2.1HG0060050
HORVU.MOREX.r2.1HG0060060
HORVU.MOREX.r2.1HG0060080
HORVU.MOREX.r2.1HG0060090
HORVU.MOREX.r2.1HG0060170
HORVU.MOREX.r2.1HG0060180
HORVU.MOREX.r2.1HG0060190
HORVU.MOREX.r2.1HG0060220
HORVU.MOREX.r2.1HG0060230
HORVU.MOREX.r2.1HG0060450
HORVU.MOREX.r2.1HG0060460
HORVU.MOREX.r2.1HG0060470
HORVU.MOREX.r2.1HG0060510
HORVU.MOREX.r2.1HG0060690
HORVU.MOREX.r2.1HG0060710
HORVU.MOREX.r2.1HG0060760
HORVU.MOREX.r2.1HG0060790
HORVU.MOREX.r2.1HG0060840
HORVU.MOREX.r2.1HG0060860
HORVU.MOREX.r2.1HG0060880
HORVU.MOREX.r2.1HG0060900
HORVU.MOREX.r2.1HG0060910
HORVU.MOREX.r2.1HG0060990
HORVU.MOREX.r2.1HG0061050
HORVU.MOREX.r2.1HG0061190
HORVU.MOREX.r2.1HG0061210
HORVU.MOREX.r2.1HG0061220
HORVU.MOREX.r2.1HG0061260
HORVU.MOREX.r2.1HG0061290
HORVU.MOREX.r2.1HG0061300
HORVU.MOREX.r2.1HG0061310
HORVU.MOREX.r2.1HG0061370
HORVU.MOREX.r2.1HG0061410
HORVU.MOREX.r2.1HG0061580
HORVU.MOREX.r2.1HG0061640
HORVU.MOREX.r2.1HG0061660
HORVU.MOREX.r2.1HG0061700
HORVU.MOREX.r2.1HG0061740
HORVU.MOREX.r2.1HG0061800
HORVU.MOREX.r2.1HG0061820
HORVU.MOREX.r2.1HG0061930
HORVU.MOREX.r2.1HG0062030
HORVU.MOREX.r2.1HG0062110
HORVU.MOREX.r2.1HG0062130
HORVU.MOREX.r2.1HG0062250
HORVU.MOREX.r2.1HG0062260
HORVU.MOREX.r2.1HG0062330
HORVU.MOREX.r2.1HG0062370
HORVU.MOREX.r2.1HG0062380
HORVU.MOREX.r2.1HG0062410
HORVU.MOREX.r2.1HG0062420
HORVU.MOREX.r2.1HG0062440
HORVU.MOREX.r2.1HG0062530
HORVU.MOREX.r2.1HG0062600
HORVU.MOREX.r2.1HG0062610
HORVU.MOREX.r2.1HG0062630
HORVU.MOREX.r2.1HG0062670
HORVU.MOREX.r2.1HG0062680
HORVU.MOREX.r2.1HG0062820
HORVU.MOREX.r2.1HG0062840
HORVU.MOREX.r2.1HG0062920
HORVU.MOREX.r2.1HG0062960
HORVU.MOREX.r2.1HG0063070
HORVU.MOREX.r2.1HG0063080
HORVU.MOREX.r2.1HG0063140
HORVU.MOREX.r2.1HG0063260
HORVU.MOREX.r2.1HG0063310
HORVU.MOREX.r2.1HG0063340
HORVU.MOREX.r2.1HG0063390
HORVU.MOREX.r2.1HG0063400
HORVU.MOREX.r2.1HG0063520
HORVU.MOREX.r2.1HG0063530
HORVU.MOREX.r2.1HG0063540
HORVU.MOREX.r2.1HG0063620
HORVU.MOREX.r2.1HG0063650
HORVU.MOREX.r2.1HG0063660
HORVU.MOREX.r2.1HG0063710
HORVU.MOREX.r2.1HG0063720
HORVU.MOREX.r2.1HG0063730
HORVU.MOREX.r2.1HG0063860
HORVU.MOREX.r2.1HG0063900
HORVU.MOREX.r2.1HG0063930
HORVU.MOREX.r2.1HG0063940
HORVU.MOREX.r2.1HG0063980
HORVU.MOREX.r2.1HG0064000
HORVU.MOREX.r2.1HG0064090
HORVU.MOREX.r2.1HG0064100
HORVU.MOREX.r2.1HG0064150
HORVU.MOREX.r2.1HG0064230
HORVU.MOREX.r2.1HG0064240
HORVU.MOREX.r2.1HG0064250
HORVU.MOREX.r2.1HG0064290
HORVU.MOREX.r2.1HG0064350
HORVU.MOREX.r2.1HG0064440
HORVU.MOREX.r2.1HG0064520
HORVU.MOREX.r2.1HG0064550
HORVU.MOREX.r2.1HG0064610
HORVU.MOREX.r2.1HG0064690
HORVU.MOREX.r2.1HG0064720
HORVU.MOREX.r2.1HG0064900
HORVU.MOREX.r2.1HG0064940
HORVU.MOREX.r2.1HG0065060
HORVU.MOREX.r2.1HG0065080
HORVU.MOREX.r2.1HG0065150
HORVU.MOREX.r2.1HG0065230
HORVU.MOREX.r2.1HG0065250
HORVU.MOREX.r2.1HG0065460
HORVU.MOREX.r2.1HG0065480
HORVU.MOREX.r2.1HG0065490
HORVU.MOREX.r2.1HG0065550
HORVU.MOREX.r2.1HG0065570
HORVU.MOREX.r2.1HG0065600
HORVU.MOREX.r2.1HG0065610
HORVU.MOREX.r2.1HG0065710
HORVU.MOREX.r2.1HG0065810
HORVU.MOREX.r2.1HG0065890
HORVU.MOREX.r2.1HG0065910
HORVU.MOREX.r2.1HG0066030
HORVU.MOREX.r2.1HG0066050
HORVU.MOREX.r2.1HG0066160
HORVU.MOREX.r2.1HG0066180
HORVU.MOREX.r2.1HG0066190
HORVU.MOREX.r2.1HG0066210
HORVU.MOREX.r2.1HG0066230
HORVU.MOREX.r2.1HG0066300
HORVU.MOREX.r2.1HG0066320
HORVU.MOREX.r2.1HG0066400
HORVU.MOREX.r2.1HG0066410
HORVU.MOREX.r2.1HG0066500
HORVU.MOREX.r2.1HG0066510
HORVU.MOREX.r2.1HG0066530
HORVU.MOREX.r2.1HG0066540
HORVU.MOREX.r2.1HG0066560
HORVU.MOREX.r2.1HG0066610
HORVU.MOREX.r2.1HG0066720
HORVU.MOREX.r2.1HG0066800
HORVU.MOREX.r2.1HG0066840
HORVU.MOREX.r2.1HG0066850
HORVU.MOREX.r2.1HG0066870
HORVU.MOREX.r2.1HG0066880
HORVU.MOREX.r2.1HG0066900
HORVU.MOREX.r2.1HG0066910
HORVU.MOREX.r2.1HG0066940
HORVU.MOREX.r2.1HG0066990
HORVU.MOREX.r2.1HG0067070
HORVU.MOREX.r2.1HG0067080
HORVU.MOREX.r2.1HG0067160
HORVU.MOREX.r2.1HG0067220
HORVU.MOREX.r2.1HG0067230
HORVU.MOREX.r2.1HG0067260
HORVU.MOREX.r2.1HG0067270
HORVU.MOREX.r2.1HG0067330
HORVU.MOREX.r2.1HG0067390
HORVU.MOREX.r2.1HG0067440
HORVU.MOREX.r2.1HG0067480
HORVU.MOREX.r2.1HG0067490
HORVU.MOREX.r2.1HG0067520
HORVU.MOREX.r2.1HG0067540
HORVU.MOREX.r2.1HG0067570
HORVU.MOREX.r2.1HG0067800
HORVU.MOREX.r2.1HG0067820
HORVU.MOREX.r2.1HG0067830
HORVU.MOREX.r2.1HG0067840
HORVU.MOREX.r2.1HG0067870
HORVU.MOREX.r2.1HG0067900
HORVU.MOREX.r2.1HG0068000
HORVU.MOREX.r2.1HG0068050
HORVU.MOREX.r2.1HG0068060
HORVU.MOREX.r2.1HG0068170
HORVU.MOREX.r2.1HG0068180
HORVU.MOREX.r2.1HG0068190
HORVU.MOREX.r2.1HG0068210
HORVU.MOREX.r2.1HG0068260
HORVU.MOREX.r2.1HG0068360
HORVU.MOREX.r2.1HG0068420
HORVU.MOREX.r2.1HG0068430
HORVU.MOREX.r2.1HG0068560
HORVU.MOREX.r2.1HG0068610
HORVU.MOREX.r2.1HG0068660
HORVU.MOREX.r2.1HG0068680
HORVU.MOREX.r2.1HG0068740
HORVU.MOREX.r2.1HG0068760
HORVU.MOREX.r2.1HG0068790
HORVU.MOREX.r2.1HG0068960
HORVU.MOREX.r2.1HG0069000
HORVU.MOREX.r2.1HG0069020
HORVU.MOREX.r2.1HG0069120
HORVU.MOREX.r2.1HG0069130
HORVU.MOREX.r2.1HG0069170
HORVU.MOREX.r2.1HG0069240
HORVU.MOREX.r2.1HG0069310
HORVU.MOREX.r2.1HG0069640
HORVU.MOREX.r2.1HG0069670
HORVU.MOREX.r2.1HG0069780
HORVU.MOREX.r2.1HG0069790
HORVU.MOREX.r2.1HG0069860
HORVU.MOREX.r2.1HG0069880
HORVU.MOREX.r2.1HG0069900
HORVU.MOREX.r2.1HG0069930
HORVU.MOREX.r2.1HG0069960
HORVU.MOREX.r2.1HG0070010
HORVU.MOREX.r2.1HG0070020
HORVU.MOREX.r2.1HG0070040
HORVU.MOREX.r2.1HG0070090
HORVU.MOREX.r2.1HG0070100
HORVU.MOREX.r2.1HG0070130
HORVU.MOREX.r2.1HG0070170
HORVU.MOREX.r2.1HG0070240
HORVU.MOREX.r2.1HG0070250
HORVU.MOREX.r2.1HG0070300
HORVU.MOREX.r2.1HG0070310
HORVU.MOREX.r2.1HG0070400
HORVU.MOREX.r2.1HG0070480
HORVU.MOREX.r2.1HG0070490
HORVU.MOREX.r2.1HG0070520
HORVU.MOREX.r2.1HG0070580
HORVU.MOREX.r2.1HG0070730
HORVU.MOREX.r2.1HG0070850
HORVU.MOREX.r2.1HG0071020
HORVU.MOREX.r2.1HG0071150
HORVU.MOREX.r2.1HG0071220
HORVU.MOREX.r2.1HG0071240
HORVU.MOREX.r2.1HG0071270
HORVU.MOREX.r2.1HG0071510
HORVU.MOREX.r2.1HG0071600
HORVU.MOREX.r2.1HG0071620
HORVU.MOREX.r2.1HG0071830
HORVU.MOREX.r2.1HG0072050
HORVU.MOREX.r2.1HG0072140
HORVU.MOREX.r2.1HG0072340
HORVU.MOREX.r2.1HG0072360
HORVU.MOREX.r2.1HG0072390
HORVU.MOREX.r2.1HG0072640
HORVU.MOREX.r2.1HG0072650
HORVU.MOREX.r2.1HG0072720
HORVU.MOREX.r2.1HG0072750
HORVU.MOREX.r2.1HG0072780
HORVU.MOREX.r2.1HG0072790
HORVU.MOREX.r2.1HG0072800
HORVU.MOREX.r2.1HG0072820
HORVU.MOREX.r2.1HG0072860
HORVU.MOREX.r2.1HG0072870
HORVU.MOREX.r2.1HG0072890
HORVU.MOREX.r2.1HG0073000
HORVU.MOREX.r2.1HG0073120
HORVU.MOREX.r2.1HG0073180
HORVU.MOREX.r2.1HG0073210
HORVU.MOREX.r2.1HG0073230
HORVU.MOREX.r2.1HG0073250
HORVU.MOREX.r2.1HG0073290
HORVU.MOREX.r2.1HG0073350
HORVU.MOREX.r2.1HG0073450
HORVU.MOREX.r2.1HG0073500
HORVU.MOREX.r2.1HG0073610
HORVU.MOREX.r2.1HG0073640
HORVU.MOREX.r2.1HG0073700
HORVU.MOREX.r2.1HG0073720
HORVU.MOREX.r2.1HG0073730
HORVU.MOREX.r2.1HG0073870
HORVU.MOREX.r2.1HG0074000
HORVU.MOREX.r2.1HG0074010
HORVU.MOREX.r2.1HG0074040
HORVU.MOREX.r2.1HG0074060
HORVU.MOREX.r2.1HG0074080
HORVU.MOREX.r2.1HG0074100
HORVU.MOREX.r2.1HG0074140
HORVU.MOREX.r2.1HG0074160
HORVU.MOREX.r2.1HG0074170
HORVU.MOREX.r2.1HG0074190
HORVU.MOREX.r2.1HG0074230
HORVU.MOREX.r2.1HG0074290
HORVU.MOREX.r2.1HG0074360
HORVU.MOREX.r2.1HG0074680
HORVU.MOREX.r2.1HG0074690
HORVU.MOREX.r2.1HG0074900
HORVU.MOREX.r2.1HG0075160
HORVU.MOREX.r2.1HG0075180
HORVU.MOREX.r2.1HG0075440
HORVU.MOREX.r2.1HG0075470
HORVU.MOREX.r2.1HG0075480
HORVU.MOREX.r2.1HG0075650
HORVU.MOREX.r2.1HG0075660
HORVU.MOREX.r2.1HG0075680
HORVU.MOREX.r2.1HG0075740
HORVU.MOREX.r2.1HG0075830
HORVU.MOREX.r2.1HG0075860
HORVU.MOREX.r2.1HG0075920
HORVU.MOREX.r2.1HG0075930
HORVU.MOREX.r2.1HG0075990
HORVU.MOREX.r2.1HG0076110
HORVU.MOREX.r2.1HG0076150
HORVU.MOREX.r2.1HG0076180
HORVU.MOREX.r2.1HG0076200
HORVU.MOREX.r2.1HG0076210
HORVU.MOREX.r2.1HG0076340
HORVU.MOREX.r2.1HG0076360
HORVU.MOREX.r2.1HG0076420
HORVU.MOREX.r2.1HG0076430
HORVU.MOREX.r2.1HG0076460
HORVU.MOREX.r2.1HG0076470
HORVU.MOREX.r2.1HG0076480
HORVU.MOREX.r2.1HG0076490
HORVU.MOREX.r2.1HG0076530
HORVU.MOREX.r2.1HG0076590
HORVU.MOREX.r2.1HG0076610
HORVU.MOREX.r2.1HG0076620
HORVU.MOREX.r2.1HG0076630
HORVU.MOREX.r2.1HG0076700
HORVU.MOREX.r2.1HG0076710
HORVU.MOREX.r2.1HG0076720
HORVU.MOREX.r2.1HG0076790
HORVU.MOREX.r2.1HG0076840
HORVU.MOREX.r2.1HG0076860
HORVU.MOREX.r2.1HG0076870
HORVU.MOREX.r2.1HG0077240
HORVU.MOREX.r2.1HG0077330
HORVU.MOREX.r2.1HG0077380
HORVU.MOREX.r2.1HG0077450
HORVU.MOREX.r2.1HG0077480
HORVU.MOREX.r2.1HG0077490
HORVU.MOREX.r2.1HG0077540
HORVU.MOREX.r2.1HG0077750
HORVU.MOREX.r2.1HG0077760
HORVU.MOREX.r2.1HG0077880
HORVU.MOREX.r2.1HG0077910
HORVU.MOREX.r2.1HG0077940
HORVU.MOREX.r2.1HG0078020
HORVU.MOREX.r2.1HG0078030
HORVU.MOREX.r2.1HG0078100
HORVU.MOREX.r2.1HG0078130
HORVU.MOREX.r2.1HG0078140
HORVU.MOREX.r2.1HG0078180
HORVU.MOREX.r2.1HG0078200
HORVU.MOREX.r2.1HG0078240
HORVU.MOREX.r2.1HG0078260
HORVU.MOREX.r2.1HG0078370
HORVU.MOREX.r2.1HG0078380
HORVU.MOREX.r2.1HG0078400
HORVU.MOREX.r2.1HG0078410
HORVU.MOREX.r2.1HG0078440
HORVU.MOREX.r2.1HG0078510
HORVU.MOREX.r2.1HG0078540
HORVU.MOREX.r2.1HG0078650
HORVU.MOREX.r2.1HG0078670
HORVU.MOREX.r2.1HG0078680
HORVU.MOREX.r2.1HG0000050
HORVU.MOREX.r2.1HG0000060
HORVU.MOREX.r2.1HG0000070
HORVU.MOREX.r2.1HG0000110
HORVU.MOREX.r2.1HG0000180
HORVU.MOREX.r2.1HG0000230
HORVU.MOREX.r2.1HG0000300
HORVU.MOREX.r2.1HG0000320
HORVU.MOREX.r2.1HG0000440
HORVU.MOREX.r2.1HG0000450
HORVU.MOREX.r2.1HG0000470
HORVU.MOREX.r2.1HG0000670
HORVU.MOREX.r2.1HG0000700
HORVU.MOREX.r2.1HG0000730
HORVU.MOREX.r2.1HG0000870
HORVU.MOREX.r2.1HG0001030
HORVU.MOREX.r2.1HG0001240
HORVU.MOREX.r2.1HG0001530
HORVU.MOREX.r2.1HG0001550
HORVU.MOREX.r2.1HG0001580
HORVU.MOREX.r2.1HG0001590
HORVU.MOREX.r2.1HG0001610
HORVU.MOREX.r2.1HG0001870
HORVU.MOREX.r2.1HG0001880
HORVU.MOREX.r2.1HG0001980
HORVU.MOREX.r2.1HG0002050
HORVU.MOREX.r2.1HG0002070
HORVU.MOREX.r2.1HG0002170
HORVU.MOREX.r2.1HG0002180
HORVU.MOREX.r2.1HG0002200
HORVU.MOREX.r2.1HG0002310
HORVU.MOREX.r2.1HG0002320
HORVU.MOREX.r2.1HG0002390
HORVU.MOREX.r2.1HG0002410
HORVU.MOREX.r2.1HG0002650
HORVU.MOREX.r2.1HG0002860
HORVU.MOREX.r2.1HG0002910
HORVU.MOREX.r2.1HG0003050
HORVU.MOREX.r2.1HG0003070
HORVU.MOREX.r2.1HG0003080
HORVU.MOREX.r2.1HG0003170
HORVU.MOREX.r2.1HG0003210
HORVU.MOREX.r2.1HG0003470
HORVU.MOREX.r2.1HG0003600
HORVU.MOREX.r2.1HG0003620
HORVU.MOREX.r2.1HG0003750
HORVU.MOREX.r2.1HG0003760
HORVU.MOREX.r2.1HG0003840
HORVU.MOREX.r2.1HG0003870
HORVU.MOREX.r2.1HG0003940
HORVU.MOREX.r2.1HG0003950
HORVU.MOREX.r2.1HG0003970
HORVU.MOREX.r2.1HG0004030
HORVU.MOREX.r2.1HG0004070
HORVU.MOREX.r2.1HG0004080
HORVU.MOREX.r2.1HG0004130
HORVU.MOREX.r2.1HG0004270
HORVU.MOREX.r2.1HG0004310
HORVU.MOREX.r2.1HG0004320
HORVU.MOREX.r2.1HG0004340
HORVU.MOREX.r2.1HG0004360
HORVU.MOREX.r2.1HG0004410
HORVU.MOREX.r2.1HG0004430
HORVU.MOREX.r2.1HG0004560
HORVU.MOREX.r2.1HG0004610
HORVU.MOREX.r2.1HG0004630
HORVU.MOREX.r2.1HG0004680
HORVU.MOREX.r2.1HG0004700
HORVU.MOREX.r2.1HG0004760
HORVU.MOREX.r2.1HG0004800
HORVU.MOREX.r2.1HG0004820
HORVU.MOREX.r2.1HG0004840
HORVU.MOREX.r2.1HG0004850
HORVU.MOREX.r2.1HG0005350
HORVU.MOREX.r2.1HG0005420
HORVU.MOREX.r2.1HG0005480
HORVU.MOREX.r2.1HG0005640
HORVU.MOREX.r2.1HG0005680
HORVU.MOREX.r2.1HG0005800
HORVU.MOREX.r2.1HG0005810
HORVU.MOREX.r2.1HG0005860
HORVU.MOREX.r2.1HG0005880
HORVU.MOREX.r2.1HG0006010
HORVU.MOREX.r2.1HG0006130
HORVU.MOREX.r2.1HG0006140
HORVU.MOREX.r2.1HG0006200
HORVU.MOREX.r2.1HG0006210
HORVU.MOREX.r2.1HG0006370
HORVU.MOREX.r2.1HG0006390
HORVU.MOREX.r2.1HG0006400
HORVU.MOREX.r2.1HG0006410
HORVU.MOREX.r2.1HG0006540
HORVU.MOREX.r2.1HG0006560
HORVU.MOREX.r2.1HG0006590
HORVU.MOREX.r2.1HG0006630
HORVU.MOREX.r2.1HG0006680
HORVU.MOREX.r2.1HG0006710
HORVU.MOREX.r2.1HG0006720
HORVU.MOREX.r2.1HG0007090
HORVU.MOREX.r2.1HG0007290
HORVU.MOREX.r2.1HG0007340
HORVU.MOREX.r2.1HG0007670
HORVU.MOREX.r2.1HG0008100
HORVU.MOREX.r2.1HG0008110
HORVU.MOREX.r2.1HG0008120
HORVU.MOREX.r2.1HG0008270
HORVU.MOREX.r2.1HG0008320
HORVU.MOREX.r2.1HG0008370
HORVU.MOREX.r2.1HG0008380
HORVU.MOREX.r2.1HG0008420
HORVU.MOREX.r2.1HG0008890
HORVU.MOREX.r2.1HG0008900
HORVU.MOREX.r2.1HG0008910
HORVU.MOREX.r2.1HG0008920
HORVU.MOREX.r2.1HG0009100
HORVU.MOREX.r2.1HG0009140
HORVU.MOREX.r2.1HG0009190
HORVU.MOREX.r2.1HG0009240
HORVU.MOREX.r2.1HG0009250
HORVU.MOREX.r2.1HG0009310
HORVU.MOREX.r2.1HG0009340
HORVU.MOREX.r2.1HG0009690
HORVU.MOREX.r2.1HG0009780
HORVU.MOREX.r2.1HG0009920
HORVU.MOREX.r2.1HG0009930
HORVU.MOREX.r2.1HG0009970
HORVU.MOREX.r2.1HG0010090
HORVU.MOREX.r2.1HG0010160
HORVU.MOREX.r2.1HG0010590
HORVU.MOREX.r2.1HG0010610
HORVU.MOREX.r2.1HG0010640
HORVU.MOREX.r2.1HG0010650
HORVU.MOREX.r2.1HG0010750
HORVU.MOREX.r2.1HG0010840
HORVU.MOREX.r2.1HG0010950
HORVU.MOREX.r2.1HG0011040
HORVU.MOREX.r2.1HG0011120
HORVU.MOREX.r2.1HG0011150
HORVU.MOREX.r2.1HG0011170
HORVU.MOREX.r2.1HG0011270
HORVU.MOREX.r2.1HG0011280
HORVU.MOREX.r2.1HG0011320
HORVU.MOREX.r2.1HG0011360
HORVU.MOREX.r2.1HG0011460
HORVU.MOREX.r2.1HG0011580
HORVU.MOREX.r2.1HG0011610
HORVU.MOREX.r2.1HG0011850
HORVU.MOREX.r2.1HG0011860
HORVU.MOREX.r2.1HG0011870
HORVU.MOREX.r2.1HG0011910
HORVU.MOREX.r2.1HG0011920
HORVU.MOREX.r2.1HG0012390
HORVU.MOREX.r2.1HG0012470
HORVU.MOREX.r2.1HG0012580
HORVU.MOREX.r2.1HG0012620
HORVU.MOREX.r2.1HG0012660
HORVU.MOREX.r2.1HG0012710
HORVU.MOREX.r2.1HG0012730
HORVU.MOREX.r2.1HG0012750
HORVU.MOREX.r2.1HG0012760
HORVU.MOREX.r2.1HG0012880
HORVU.MOREX.r2.1HG0012890
HORVU.MOREX.r2.1HG0012970
HORVU.MOREX.r2.1HG0013080
HORVU.MOREX.r2.1HG0013090
HORVU.MOREX.r2.1HG0013160
HORVU.MOREX.r2.1HG0013170
HORVU.MOREX.r2.1HG0013180
HORVU.MOREX.r2.1HG0013190
HORVU.MOREX.r2.1HG0013320
HORVU.MOREX.r2.1HG0013430
HORVU.MOREX.r2.1HG0013500
HORVU.MOREX.r2.1HG0013730
HORVU.MOREX.r2.1HG0013750
HORVU.MOREX.r2.1HG0013790
HORVU.MOREX.r2.1HG0013890
HORVU.MOREX.r2.1HG0013930
HORVU.MOREX.r2.1HG0013960
HORVU.MOREX.r2.1HG0013980
HORVU.MOREX.r2.1HG0014000
HORVU.MOREX.r2.1HG0014140
HORVU.MOREX.r2.1HG0014200
HORVU.MOREX.r2.1HG0014210
HORVU.MOREX.r2.1HG0014220
HORVU.MOREX.r2.1HG0014240
HORVU.MOREX.r2.1HG0014250
HORVU.MOREX.r2.1HG0014290
HORVU.MOREX.r2.1HG0014560
HORVU.MOREX.r2.1HG0014570
HORVU.MOREX.r2.1HG0014600
HORVU.MOREX.r2.1HG0014620
HORVU.MOREX.r2.1HG0014640
HORVU.MOREX.r2.1HG0014660
HORVU.MOREX.r2.1HG0014670
HORVU.MOREX.r2.1HG0014750
HORVU.MOREX.r2.1HG0014840
HORVU.MOREX.r2.1HG0014910
HORVU.MOREX.r2.1HG0014920
HORVU.MOREX.r2.1HG0014940
HORVU.MOREX.r2.1HG0014970
HORVU.MOREX.r2.1HG0014990
HORVU.MOREX.r2.1HG0015080
HORVU.MOREX.r2.1HG0015090
HORVU.MOREX.r2.1HG0015140
HORVU.MOREX.r2.1HG0015280
HORVU.MOREX.r2.1HG0015410
HORVU.MOREX.r2.1HG0015630
HORVU.MOREX.r2.1HG0015640
HORVU.MOREX.r2.1HG0015690
HORVU.MOREX.r2.1HG0015930
HORVU.MOREX.r2.1HG0015970
HORVU.MOREX.r2.1HG0016190
HORVU.MOREX.r2.1HG0016250
HORVU.MOREX.r2.1HG0016290
HORVU.MOREX.r2.1HG0016430
HORVU.MOREX.r2.1HG0016540
HORVU.MOREX.r2.1HG0016580
HORVU.MOREX.r2.1HG0016590
HORVU.MOREX.r2.1HG0016720
HORVU.MOREX.r2.1HG0016850
HORVU.MOREX.r2.1HG0017160
HORVU.MOREX.r2.1HG0017170
HORVU.MOREX.r2.1HG0017270
HORVU.MOREX.r2.1HG0017300
HORVU.MOREX.r2.1HG0017350
HORVU.MOREX.r2.1HG0017360
HORVU.MOREX.r2.1HG0017380
HORVU.MOREX.r2.1HG0017460
HORVU.MOREX.r2.1HG0017470
HORVU.MOREX.r2.1HG0017700
HORVU.MOREX.r2.1HG0017710
HORVU.MOREX.r2.1HG0017770
HORVU.MOREX.r2.1HG0017790
HORVU.MOREX.r2.1HG0017800
HORVU.MOREX.r2.1HG0017820
HORVU.MOREX.r2.1HG0017850
HORVU.MOREX.r2.1HG0017870
HORVU.MOREX.r2.1HG0018040
HORVU.MOREX.r2.1HG0018100
HORVU.MOREX.r2.1HG0018140
HORVU.MOREX.r2.1HG0018200
HORVU.MOREX.r2.1HG0018440
HORVU.MOREX.r2.1HG0018500
HORVU.MOREX.r2.1HG0018520
HORVU.MOREX.r2.1HG0018770
HORVU.MOREX.r2.1HG0018790
HORVU.MOREX.r2.1HG0018930
HORVU.MOREX.r2.1HG0019020
HORVU.MOREX.r2.1HG0019040
HORVU.MOREX.r2.1HG0019050
HORVU.MOREX.r2.1HG0019070
HORVU.MOREX.r2.1HG0019110
HORVU.MOREX.r2.1HG0019190
HORVU.MOREX.r2.1HG0019290
HORVU.MOREX.r2.1HG0019300
HORVU.MOREX.r2.1HG0019520
HORVU.MOREX.r2.1HG0019550
HORVU.MOREX.r2.1HG0019570
HORVU.MOREX.r2.1HG0019700
HORVU.MOREX.r2.1HG0019760
HORVU.MOREX.r2.1HG0019860
HORVU.MOREX.r2.1HG0019910
HORVU.MOREX.r2.1HG0020160
HORVU.MOREX.r2.1HG0020240
HORVU.MOREX.r2.1HG0020380
HORVU.MOREX.r2.1HG0020460
HORVU.MOREX.r2.1HG0020490
HORVU.MOREX.r2.1HG0020560
HORVU.MOREX.r2.1HG0020600
HORVU.MOREX.r2.1HG0020620
HORVU.MOREX.r2.1HG0020640
HORVU.MOREX.r2.1HG0020650
HORVU.MOREX.r2.1HG0020950
HORVU.MOREX.r2.1HG0021120
HORVU.MOREX.r2.1HG0021190
HORVU.MOREX.r2.1HG0021200
HORVU.MOREX.r2.1HG0021210
HORVU.MOREX.r2.1HG0021230
HORVU.MOREX.r2.1HG0021290
HORVU.MOREX.r2.1HG0021470
HORVU.MOREX.r2.1HG0021480
HORVU.MOREX.r2.1HG0021580
HORVU.MOREX.r2.1HG0021830
HORVU.MOREX.r2.1HG0022060
HORVU.MOREX.r2.1HG0022130
HORVU.MOREX.r2.1HG0022140
HORVU.MOREX.r2.1HG0022170
HORVU.MOREX.r2.1HG0022230
HORVU.MOREX.r2.1HG0022240
HORVU.MOREX.r2.1HG0022270
HORVU.MOREX.r2.1HG0022980
HORVU.MOREX.r2.1HG0023040
HORVU.MOREX.r2.1HG0023100
HORVU.MOREX.r2.1HG0023110
HORVU.MOREX.r2.1HG0023160
HORVU.MOREX.r2.1HG0023180
HORVU.MOREX.r2.1HG0023190
HORVU.MOREX.r2.1HG0023220
HORVU.MOREX.r2.1HG0023250
HORVU.MOREX.r2.1HG0023270
HORVU.MOREX.r2.1HG0023360
HORVU.MOREX.r2.1HG0023390
HORVU.MOREX.r2.1HG0023430
HORVU.MOREX.r2.1HG0023550
HORVU.MOREX.r2.1HG0023690
HORVU.MOREX.r2.1HG0023760
HORVU.MOREX.r2.1HG0023970
HORVU.MOREX.r2.1HG0023990
HORVU.MOREX.r2.1HG0024040
HORVU.MOREX.r2.1HG0024100
HORVU.MOREX.r2.1HG0024150
HORVU.MOREX.r2.1HG0024240
HORVU.MOREX.r2.1HG0024490
HORVU.MOREX.r2.1HG0024530
HORVU.MOREX.r2.1HG0024570
HORVU.MOREX.r2.1HG0024700
HORVU.MOREX.r2.1HG0024740
HORVU.MOREX.r2.1HG0024750
HORVU.MOREX.r2.1HG0025000
HORVU.MOREX.r2.1HG0025040
HORVU.MOREX.r2.1HG0025130
HORVU.MOREX.r2.1HG0025170
HORVU.MOREX.r2.1HG0025270
HORVU.MOREX.r2.1HG0025490
HORVU.MOREX.r2.1HG0025520
HORVU.MOREX.r2.1HG0025600
HORVU.MOREX.r2.1HG0025640
HORVU.MOREX.r2.1HG0025670
HORVU.MOREX.r2.1HG0025700
HORVU.MOREX.r2.1HG0025750
HORVU.MOREX.r2.1HG0025800
HORVU.MOREX.r2.1HG0025880
HORVU.MOREX.r2.1HG0025950
HORVU.MOREX.r2.1HG0025970
HORVU.MOREX.r2.1HG0026060
HORVU.MOREX.r2.1HG0026080
HORVU.MOREX.r2.1HG0026100
HORVU.MOREX.r2.1HG0026120
HORVU.MOREX.r2.1HG0026140
HORVU.MOREX.r2.1HG0026150
HORVU.MOREX.r2.1HG0026160
HORVU.MOREX.r2.1HG0026350
HORVU.MOREX.r2.1HG0026400
HORVU.MOREX.r2.1HG0026560
HORVU.MOREX.r2.1HG0026610
HORVU.MOREX.r2.1HG0026710
HORVU.MOREX.r2.1HG0026810
HORVU.MOREX.r2.1HG0026840
HORVU.MOREX.r2.1HG0026880
HORVU.MOREX.r2.1HG0027000
HORVU.MOREX.r2.1HG0027100
HORVU.MOREX.r2.1HG0027110
HORVU.MOREX.r2.1HG0027140
HORVU.MOREX.r2.1HG0027180
HORVU.MOREX.r2.1HG0027190
HORVU.MOREX.r2.1HG0027200
HORVU.MOREX.r2.1HG0027350
HORVU.MOREX.r2.1HG0027460
HORVU.MOREX.r2.1HG0027540
HORVU.MOREX.r2.1HG0027550
HORVU.MOREX.r2.1HG0027560
HORVU.MOREX.r2.1HG0027620
HORVU.MOREX.r2.1HG0028180
HORVU.MOREX.r2.1HG0028190
HORVU.MOREX.r2.1HG0028240
HORVU.MOREX.r2.1HG0028260
HORVU.MOREX.r2.1HG0028390
HORVU.MOREX.r2.1HG0028620
HORVU.MOREX.r2.1HG0028700
HORVU.MOREX.r2.1HG0028780
HORVU.MOREX.r2.1HG0028810
HORVU.MOREX.r2.1HG0028950
HORVU.MOREX.r2.1HG0029000
HORVU.MOREX.r2.1HG0029010
HORVU.MOREX.r2.1HG0029020
HORVU.MOREX.r2.1HG0029220
HORVU.MOREX.r2.1HG0029250
HORVU.MOREX.r2.1HG0029270
HORVU.MOREX.r2.1HG0029280
HORVU.MOREX.r2.1HG0029530
HORVU.MOREX.r2.1HG0029580
HORVU.MOREX.r2.1HG0029600
HORVU.MOREX.r2.1HG0029630
HORVU.MOREX.r2.1HG0029650
HORVU.MOREX.r2.1HG0029660
HORVU.MOREX.r2.1HG0029870
HORVU.MOREX.r2.1HG0029930
HORVU.MOREX.r2.1HG0029980
HORVU.MOREX.r2.1HG0030040
HORVU.MOREX.r2.1HG0030110
HORVU.MOREX.r2.1HG0030320
HORVU.MOREX.r2.1HG0030330
HORVU.MOREX.r2.1HG0030340
HORVU.MOREX.r2.1HG0030370
HORVU.MOREX.r2.1HG0030770
HORVU.MOREX.r2.1HG0030810
HORVU.MOREX.r2.1HG0030890
HORVU.MOREX.r2.1HG0030900
HORVU.MOREX.r2.1HG0030950
HORVU.MOREX.r2.1HG0031090
HORVU.MOREX.r2.1HG0031330
HORVU.MOREX.r2.1HG0031440
HORVU.MOREX.r2.1HG0031500
HORVU.MOREX.r2.1HG0031630
HORVU.MOREX.r2.1HG0031680
HORVU.MOREX.r2.1HG0031720
HORVU.MOREX.r2.1HG0031750
HORVU.MOREX.r2.1HG0031800
HORVU.MOREX.r2.1HG0031870
HORVU.MOREX.r2.1HG0032020
HORVU.MOREX.r2.1HG0032360
HORVU.MOREX.r2.1HG0032460
HORVU.MOREX.r2.1HG0032560
HORVU.MOREX.r2.1HG0032620
HORVU.MOREX.r2.1HG0032770
HORVU.MOREX.r2.1HG0032810
HORVU.MOREX.r2.1HG0032840
HORVU.MOREX.r2.1HG0032950
HORVU.MOREX.r2.1HG0032960
HORVU.MOREX.r2.1HG0033000
HORVU.MOREX.r2.1HG0033180
HORVU.MOREX.r2.1HG0033260
HORVU.MOREX.r2.1HG0033320
HORVU.MOREX.r2.1HG0033360
HORVU.MOREX.r2.1HG0033440
HORVU.MOREX.r2.1HG0033520
HORVU.MOREX.r2.1HG0033660
HORVU.MOREX.r2.1HG0033760
HORVU.MOREX.r2.1HG0033790
HORVU.MOREX.r2.1HG0033960
HORVU.MOREX.r2.1HG0034090
HORVU.MOREX.r2.1HG0034100
HORVU.MOREX.r2.1HG0034210
HORVU.MOREX.r2.1HG0034290
HORVU.MOREX.r2.1HG0034330
HORVU.MOREX.r2.1HG0034380
HORVU.MOREX.r2.1HG0034390
HORVU.MOREX.r2.1HG0034430
HORVU.MOREX.r2.1HG0034480
HORVU.MOREX.r2.1HG0034490
HORVU.MOREX.r2.1HG0034520
HORVU.MOREX.r2.1HG0034560
HORVU.MOREX.r2.1HG0034570
HORVU.MOREX.r2.1HG0034610
HORVU.MOREX.r2.1HG0034640
HORVU.MOREX.r2.1HG0034670
HORVU.MOREX.r2.1HG0034680
HORVU.MOREX.r2.1HG0034730
HORVU.MOREX.r2.1HG0034770
HORVU.MOREX.r2.1HG0034860
HORVU.MOREX.r2.1HG0034900
HORVU.MOREX.r2.1HG0034940
HORVU.MOREX.r2.1HG0035110
HORVU.MOREX.r2.1HG0035280
HORVU.MOREX.r2.1HG0035300
HORVU.MOREX.r2.1HG0035320
HORVU.MOREX.r2.1HG0035700
HORVU.MOREX.r2.1HG0035730
HORVU.MOREX.r2.1HG0035740
HORVU.MOREX.r2.1HG0035780
HORVU.MOREX.r2.1HG0035810
HORVU.MOREX.r2.1HG0035900
HORVU.MOREX.r2.1HG0035910
HORVU.MOREX.r2.1HG0035930
HORVU.MOREX.r2.1HG0036010
HORVU.MOREX.r2.1HG0036040
HORVU.MOREX.r2.1HG0036090
HORVU.MOREX.r2.1HG0036100
HORVU.MOREX.r2.1HG0036220
HORVU.MOREX.r2.1HG0036240
HORVU.MOREX.r2.1HG0036370
HORVU.MOREX.r2.1HG0036430
HORVU.MOREX.r2.1HG0036490
HORVU.MOREX.r2.1HG0036560
HORVU.MOREX.r2.1HG0036690
HORVU.MOREX.r2.1HG0036700
HORVU.MOREX.r2.1HG0036720
HORVU.MOREX.r2.1HG0036770
HORVU.MOREX.r2.1HG0036790
HORVU.MOREX.r2.1HG0036900
HORVU.MOREX.r2.1HG0037140
HORVU.MOREX.r2.1HG0037200
HORVU.MOREX.r2.1HG0037230
HORVU.MOREX.r2.1HG0037340
HORVU.MOREX.r2.1HG0037400
HORVU.MOREX.r2.1HG0037430
HORVU.MOREX.r2.1HG0037450
HORVU.MOREX.r2.1HG0037470
HORVU.MOREX.r2.1HG0037500
HORVU.MOREX.r2.1HG0037510
HORVU.MOREX.r2.1HG0037780
HORVU.MOREX.r2.1HG0037930
HORVU.MOREX.r2.1HG0038020
HORVU.MOREX.r2.1HG0038110
HORVU.MOREX.r2.1HG0038160
HORVU.MOREX.r2.1HG0038250
HORVU.MOREX.r2.1HG0038330
HORVU.MOREX.r2.1HG0038350
HORVU.MOREX.r2.1HG0038360
HORVU.MOREX.r2.1HG0038370
HORVU.MOREX.r2.1HG0038420
HORVU.MOREX.r2.1HG0038510
HORVU.MOREX.r2.1HG0038610
HORVU.MOREX.r2.1HG0038640
HORVU.MOREX.r2.1HG0038670
HORVU.MOREX.r2.1HG0038680
HORVU.MOREX.r2.1HG0038800
HORVU.MOREX.r2.1HG0038860
HORVU.MOREX.r2.1HG0038870
HORVU.MOREX.r2.1HG0038920
HORVU.MOREX.r2.1HG0039120
HORVU.MOREX.r2.1HG0039130
HORVU.MOREX.r2.1HG0039140
HORVU.MOREX.r2.1HG0039160
HORVU.MOREX.r2.1HG0039180
HORVU.MOREX.r2.1HG0039270
HORVU.MOREX.r2.1HG0039410
HORVU.MOREX.r2.1HG0039530
HORVU.MOREX.r2.1HG0039590
HORVU.MOREX.r2.1HG0039610
HORVU.MOREX.r2.1HG0039630
HORVU.MOREX.r2.1HG0039700
HORVU.MOREX.r2.1HG0039750
HORVU.MOREX.r2.1HG0039760
HORVU.MOREX.r2.1HG0039770
HORVU.MOREX.r2.1HG0039810
HORVU.MOREX.r2.1HG0039940
HORVU.MOREX.r2.1HG0039950
HORVU.MOREX.r2.1HG0039980
HORVU.MOREX.r2.1HG0040110
HORVU.MOREX.r2.1HG0040340
HORVU.MOREX.r2.1HG0040430
HORVU.MOREX.r2.1HG0040560
HORVU.MOREX.r2.1HG0040690
HORVU.MOREX.r2.1HG0040760
HORVU.MOREX.r2.1HG0040770
HORVU.MOREX.r2.1HG0040780
HORVU.MOREX.r2.1HG0040820
HORVU.MOREX.r2.1HG0040920
HORVU.MOREX.r2.1HG0041020
HORVU.MOREX.r2.1HG0041050
HORVU.MOREX.r2.1HG0041220
HORVU.MOREX.r2.1HG0041250
HORVU.MOREX.r2.1HG0041260
HORVU.MOREX.r2.1HG0041320
HORVU.MOREX.r2.1HG0041330
HORVU.MOREX.r2.1HG0041380
HORVU.MOREX.r2.1HG0041390
HORVU.MOREX.r2.1HG0041400
HORVU.MOREX.r2.1HG0041430
HORVU.MOREX.r2.1HG0041530
HORVU.MOREX.r2.1HG0041570
HORVU.MOREX.r2.1HG0041630
HORVU.MOREX.r2.1HG0041670
HORVU.MOREX.r2.1HG0041690
HORVU.MOREX.r2.1HG0041720
HORVU.MOREX.r2.1HG0041750
HORVU.MOREX.r2.1HG0041770
HORVU.MOREX.r2.1HG0041780
HORVU.MOREX.r2.1HG0041800
HORVU.MOREX.r2.1HG0041840
HORVU.MOREX.r2.1HG0041860
HORVU.MOREX.r2.1HG0041900
HORVU.MOREX.r2.1HG0041910
HORVU.MOREX.r2.1HG0041930
HORVU.MOREX.r2.1HG0041950
HORVU.MOREX.r2.1HG0041980
HORVU.MOREX.r2.1HG0042020
HORVU.MOREX.r2.1HG0042030
HORVU.MOREX.r2.1HG0042040
HORVU.MOREX.r2.1HG0042050
HORVU.MOREX.r2.1HG0042060
HORVU.MOREX.r2.1HG0042070
HORVU.MOREX.r2.1HG0042080
HORVU.MOREX.r2.1HG0042160
HORVU.MOREX.r2.1HG0042180
HORVU.MOREX.r2.1HG0042190
HORVU.MOREX.r2.1HG0042210
HORVU.MOREX.r2.1HG0042260
HORVU.MOREX.r2.1HG0042270
HORVU.MOREX.r2.1HG0042350
HORVU.MOREX.r2.1HG0042370
HORVU.MOREX.r2.1HG0042390
HORVU.MOREX.r2.1HG0042450
HORVU.MOREX.r2.1HG0042520
HORVU.MOREX.r2.1HG0042590
HORVU.MOREX.r2.1HG0042620
HORVU.MOREX.r2.1HG0042650
HORVU.MOREX.r2.1HG0042790
HORVU.MOREX.r2.1HG0042800
HORVU.MOREX.r2.1HG0042860
HORVU.MOREX.r2.1HG0042870
HORVU.MOREX.r2.1HG0043160
HORVU.MOREX.r2.1HG0043170
HORVU.MOREX.r2.1HG0043180
HORVU.MOREX.r2.1HG0043390
HORVU.MOREX.r2.1HG0043400
HORVU.MOREX.r2.1HG0043540
HORVU.MOREX.r2.1HG0043560
HORVU.MOREX.r2.1HG0043610
HORVU.MOREX.r2.1HG0043630
HORVU.MOREX.r2.1HG0043690
HORVU.MOREX.r2.1HG0043700
HORVU.MOREX.r2.1HG0043760
HORVU.MOREX.r2.1HG0043790
HORVU.MOREX.r2.1HG0043840
HORVU.MOREX.r2.1HG0043850
HORVU.MOREX.r2.1HG0043860
HORVU.MOREX.r2.1HG0043910
HORVU.MOREX.r2.1HG0044020
HORVU.MOREX.r2.1HG0044080
HORVU.MOREX.r2.1HG0044130
HORVU.MOREX.r2.1HG0044140
HORVU.MOREX.r2.1HG0044280
HORVU.MOREX.r2.1HG0044300
HORVU.MOREX.r2.1HG0044320
HORVU.MOREX.r2.1HG0044330
HORVU.MOREX.r2.1HG0044380
HORVU.MOREX.r2.1HG0044410
HORVU.MOREX.r2.1HG0044470
HORVU.MOREX.r2.1HG0044550
HORVU.MOREX.r2.1HG0044630
HORVU.MOREX.r2.1HG0044650
HORVU.MOREX.r2.1HG0044670
HORVU.MOREX.r2.1HG0044700
HORVU.MOREX.r2.1HG0044720
HORVU.MOREX.r2.1HG0044740
HORVU.MOREX.r2.1HG0044760
HORVU.MOREX.r2.1HG0044790
HORVU.MOREX.r2.1HG0044870
HORVU.MOREX.r2.1HG0044880
HORVU.MOREX.r2.1HG0044890
HORVU.MOREX.r2.1HG0044910
HORVU.MOREX.r2.1HG0044960
HORVU.MOREX.r2.1HG0044980
HORVU.MOREX.r2.1HG0044990
HORVU.MOREX.r2.1HG0045020
HORVU.MOREX.r2.1HG0045180
HORVU.MOREX.r2.1HG0045370
HORVU.MOREX.r2.1HG0045400
HORVU.MOREX.r2.1HG0045430
HORVU.MOREX.r2.1HG0045490
HORVU.MOREX.r2.1HG0045510
HORVU.MOREX.r2.1HG0045520
HORVU.MOREX.r2.1HG0045580
HORVU.MOREX.r2.1HG0045690
HORVU.MOREX.r2.1HG0045700
HORVU.MOREX.r2.1HG0045770
HORVU.MOREX.r2.1HG0045830
HORVU.MOREX.r2.1HG0045840
HORVU.MOREX.r2.1HG0045900
HORVU.MOREX.r2.1HG0045970
HORVU.MOREX.r2.1HG0045980
HORVU.MOREX.r2.1HG0046040
HORVU.MOREX.r2.1HG0046110
HORVU.MOREX.r2.1HG0046120
HORVU.MOREX.r2.1HG0046130
HORVU.MOREX.r2.1HG0046170
HORVU.MOREX.r2.1HG0046200
HORVU.MOREX.r2.1HG0046280
HORVU.MOREX.r2.1HG0046310
HORVU.MOREX.r2.1HG0046360
HORVU.MOREX.r2.1HG0046390
HORVU.MOREX.r2.1HG0046450
HORVU.MOREX.r2.1HG0046460
HORVU.MOREX.r2.1HG0046590
HORVU.MOREX.r2.1HG0046650
HORVU.MOREX.r2.1HG0046680
HORVU.MOREX.r2.1HG0046730
HORVU.MOREX.r2.1HG0046860
HORVU.MOREX.r2.1HG0046940
HORVU.MOREX.r2.1HG0046960
HORVU.MOREX.r2.1HG0046970
HORVU.MOREX.r2.1HG0047080
HORVU.MOREX.r2.1HG0047140
HORVU.MOREX.r2.1HG0047280
HORVU.MOREX.r2.1HG0047450
HORVU.MOREX.r2.1HG0047480
HORVU.MOREX.r2.1HG0047510
HORVU.MOREX.r2.1HG0047530
HORVU.MOREX.r2.1HG0047600
HORVU.MOREX.r2.1HG0047660
HORVU.MOREX.r2.1HG0047730
HORVU.MOREX.r2.1HG0047790
HORVU.MOREX.r2.1HG0047840
HORVU.MOREX.r2.1HG0047870
HORVU.MOREX.r2.1HG0047880
HORVU.MOREX.r2.1HG0047910
HORVU.MOREX.r2.1HG0047930
HORVU.MOREX.r2.1HG0048000
HORVU.MOREX.r2.1HG0048170
HORVU.MOREX.r2.1HG0048180
[truncated: 20,272 more rows]

## Sheet: Table S4 D2 H3K4me3
Table S4. Genes marked with H3K4me3 in D2
HORVU.MOREX.r2.1HG0000020
HORVU.MOREX.r2.1HG0000030
HORVU.MOREX.r2.1HG0000040
HORVU.MOREX.r2.1HG0000080
HORVU.MOREX.r2.1HG0000090
HORVU.MOREX.r2.1HG0000280
HORVU.MOREX.r2.1HG0000580
HORVU.MOREX.r2.1HG0000640
HORVU.MOREX.r2.1HG0000740
HORVU.MOREX.r2.1HG0001160
HORVU.MOREX.r2.1HG0001540
HORVU.MOREX.r2.1HG0001690
HORVU.MOREX.r2.1HG0001710
HORVU.MOREX.r2.1HG0001720
HORVU.MOREX.r2.1HG0001830
HORVU.MOREX.r2.1HG0001910
HORVU.MOREX.r2.1HG0001920
HORVU.MOREX.r2.1HG0001940
HORVU.MOREX.r2.1HG0002020
HORVU.MOREX.r2.1HG0002030
HORVU.MOREX.r2.1HG0002190
HORVU.MOREX.r2.1HG0002350
HORVU.MOREX.r2.1HG0002490
HORVU.MOREX.r2.1HG0002750
HORVU.MOREX.r2.1HG0002840
HORVU.MOREX.r2.1HG0002850
HORVU.MOREX.r2.1HG0003010
HORVU.MOREX.r2.1HG0003040
HORVU.MOREX.r2.1HG0003220
HORVU.MOREX.r2.1HG0003300
HORVU.MOREX.r2.1HG0003480
HORVU.MOREX.r2.1HG0003500
HORVU.MOREX.r2.1HG0003630
HORVU.MOREX.r2.1HG0003740
HORVU.MOREX.r2.1HG0003770
HORVU.MOREX.r2.1HG0003920
HORVU.MOREX.r2.1HG0004050
HORVU.MOREX.r2.1HG0004060
HORVU.MOREX.r2.1HG0004200
HORVU.MOREX.r2.1HG0004230
HORVU.MOREX.r2.1HG0004280
HORVU.MOREX.r2.1HG0004390
HORVU.MOREX.r2.1HG0004810
HORVU.MOREX.r2.1HG0004900
HORVU.MOREX.r2.1HG0004960
HORVU.MOREX.r2.1HG0005080
HORVU.MOREX.r2.1HG0005300
HORVU.MOREX.r2.1HG0005340
HORVU.MOREX.r2.1HG0005360
HORVU.MOREX.r2.1HG0005570
HORVU.MOREX.r2.1HG0005850
HORVU.MOREX.r2.1HG0006020
HORVU.MOREX.r2.1HG0006240
HORVU.MOREX.r2.1HG0006250
HORVU.MOREX.r2.1HG0006280
HORVU.MOREX.r2.1HG0006290
HORVU.MOREX.r2.1HG0006340
HORVU.MOREX.r2.1HG0006620
HORVU.MOREX.r2.1HG0006660
HORVU.MOREX.r2.1HG0006810
HORVU.MOREX.r2.1HG0006820
HORVU.MOREX.r2.1HG0007020
HORVU.MOREX.r2.1HG0007110
HORVU.MOREX.r2.1HG0007130
HORVU.MOREX.r2.1HG0007520
HORVU.MOREX.r2.1HG0007760
HORVU.MOREX.r2.1HG0008330
HORVU.MOREX.r2.1HG0008410
HORVU.MOREX.r2.1HG0008430
HORVU.MOREX.r2.1HG0008450
HORVU.MOREX.r2.1HG0008510
HORVU.MOREX.r2.1HG0008570
HORVU.MOREX.r2.1HG0008580
HORVU.MOREX.r2.1HG0008650
HORVU.MOREX.r2.1HG0008710
HORVU.MOREX.r2.1HG0008730
HORVU.MOREX.r2.1HG0008760
HORVU.MOREX.r2.1HG0008810
HORVU.MOREX.r2.1HG0008840
HORVU.MOREX.r2.1HG0008950
HORVU.MOREX.r2.1HG0009050
HORVU.MOREX.r2.1HG0009060
HORVU.MOREX.r2.1HG0009110
HORVU.MOREX.r2.1HG0009170
HORVU.MOREX.r2.1HG0009180
HORVU.MOREX.r2.1HG0009200
HORVU.MOREX.r2.1HG0009320
HORVU.MOREX.r2.1HG0009540
HORVU.MOREX.r2.1HG0009680
HORVU.MOREX.r2.1HG0009910
HORVU.MOREX.r2.1HG0009940
HORVU.MOREX.r2.1HG0009950
HORVU.MOREX.r2.1HG0010390
HORVU.MOREX.r2.1HG0010410
HORVU.MOREX.r2.1HG0010500
HORVU.MOREX.r2.1HG0010520
HORVU.MOREX.r2.1HG0010660
HORVU.MOREX.r2.1HG0010970
HORVU.MOREX.r2.1HG0011080
HORVU.MOREX.r2.1HG0011090
HORVU.MOREX.r2.1HG0011100
HORVU.MOREX.r2.1HG0011190
HORVU.MOREX.r2.1HG0011230
HORVU.MOREX.r2.1HG0011240
HORVU.MOREX.r2.1HG0011250
HORVU.MOREX.r2.1HG0011520
HORVU.MOREX.r2.1HG0011720
HORVU.MOREX.r2.1HG0012130
HORVU.MOREX.r2.1HG0012240
HORVU.MOREX.r2.1HG0012450
HORVU.MOREX.r2.1HG0012650
HORVU.MOREX.r2.1HG0012680
HORVU.MOREX.r2.1HG0012790
HORVU.MOREX.r2.1HG0012900
HORVU.MOREX.r2.1HG0012920
HORVU.MOREX.r2.1HG0012930
HORVU.MOREX.r2.1HG0012980
HORVU.MOREX.r2.1HG0012990
HORVU.MOREX.r2.1HG0013310
HORVU.MOREX.r2.1HG0013640
HORVU.MOREX.r2.1HG0013780
HORVU.MOREX.r2.1HG0014080
HORVU.MOREX.r2.1HG0014120
HORVU.MOREX.r2.1HG0014170
HORVU.MOREX.r2.1HG0014470
HORVU.MOREX.r2.1HG0014490
HORVU.MOREX.r2.1HG0014550
HORVU.MOREX.r2.1HG0014610
HORVU.MOREX.r2.1HG0014870
HORVU.MOREX.r2.1HG0015010
HORVU.MOREX.r2.1HG0015100
HORVU.MOREX.r2.1HG0015120
HORVU.MOREX.r2.1HG0015150
HORVU.MOREX.r2.1HG0015160
HORVU.MOREX.r2.1HG0015170
HORVU.MOREX.r2.1HG0015250
HORVU.MOREX.r2.1HG0015580
HORVU.MOREX.r2.1HG0015920
HORVU.MOREX.r2.1HG0015950
HORVU.MOREX.r2.1HG0016060
HORVU.MOREX.r2.1HG0016110
HORVU.MOREX.r2.1HG0016200
HORVU.MOREX.r2.1HG0016340
HORVU.MOREX.r2.1HG0016510
HORVU.MOREX.r2.1HG0016530
HORVU.MOREX.r2.1HG0016570
HORVU.MOREX.r2.1HG0016770
HORVU.MOREX.r2.1HG0016780
HORVU.MOREX.r2.1HG0017050
HORVU.MOREX.r2.1HG0017110
HORVU.MOREX.r2.1HG0017310
HORVU.MOREX.r2.1HG0017390
HORVU.MOREX.r2.1HG0017400
HORVU.MOREX.r2.1HG0017490
HORVU.MOREX.r2.1HG0017530
HORVU.MOREX.r2.1HG0017670
HORVU.MOREX.r2.1HG0017810
HORVU.MOREX.r2.1HG0017990
HORVU.MOREX.r2.1HG0018080
HORVU.MOREX.r2.1HG0018170
HORVU.MOREX.r2.1HG0018560
HORVU.MOREX.r2.1HG0018580
HORVU.MOREX.r2.1HG0018630
HORVU.MOREX.r2.1HG0018640
HORVU.MOREX.r2.1HG0018700
HORVU.MOREX.r2.1HG0018740
HORVU.MOREX.r2.1HG0018780
HORVU.MOREX.r2.1HG0018800
HORVU.MOREX.r2.1HG0018830
HORVU.MOREX.r2.1HG0018850
HORVU.MOREX.r2.1HG0018860
HORVU.MOREX.r2.1HG0018900
HORVU.MOREX.r2.1HG0018910
HORVU.MOREX.r2.1HG0018950
HORVU.MOREX.r2.1HG0018960
HORVU.MOREX.r2.1HG0018970
HORVU.MOREX.r2.1HG0019030
HORVU.MOREX.r2.1HG0019100
HORVU.MOREX.r2.1HG0019120
HORVU.MOREX.r2.1HG0019210
HORVU.MOREX.r2.1HG0019310
HORVU.MOREX.r2.1HG0019450
HORVU.MOREX.r2.1HG0019510
HORVU.MOREX.r2.1HG0019660
HORVU.MOREX.r2.1HG0019680
HORVU.MOREX.r2.1HG0019780
HORVU.MOREX.r2.1HG0019790
HORVU.MOREX.r2.1HG0020140
HORVU.MOREX.r2.1HG0020280
HORVU.MOREX.r2.1HG0020320
HORVU.MOREX.r2.1HG0020430
HORVU.MOREX.r2.1HG0020470
HORVU.MOREX.r2.1HG0020540
HORVU.MOREX.r2.1HG0020610
HORVU.MOREX.r2.1HG0020680
HORVU.MOREX.r2.1HG0020750
HORVU.MOREX.r2.1HG0020770
HORVU.MOREX.r2.1HG0020800
HORVU.MOREX.r2.1HG0020910
HORVU.MOREX.r2.1HG0021270
HORVU.MOREX.r2.1HG0021280
HORVU.MOREX.r2.1HG0021310
HORVU.MOREX.r2.1HG0021320
HORVU.MOREX.r2.1HG0021340
HORVU.MOREX.r2.1HG0021370
HORVU.MOREX.r2.1HG0021410
HORVU.MOREX.r2.1HG0021490
HORVU.MOREX.r2.1HG0021500
HORVU.MOREX.r2.1HG0021590
HORVU.MOREX.r2.1HG0021680
HORVU.MOREX.r2.1HG0021740
HORVU.MOREX.r2.1HG0021810
HORVU.MOREX.r2.1HG0021840
HORVU.MOREX.r2.1HG0021990
HORVU.MOREX.r2.1HG0022070
HORVU.MOREX.r2.1HG0022090
HORVU.MOREX.r2.1HG0022310
HORVU.MOREX.r2.1HG0022330
HORVU.MOREX.r2.1HG0022960
HORVU.MOREX.r2.1HG0022990
HORVU.MOREX.r2.1HG0023130
HORVU.MOREX.r2.1HG0023280
HORVU.MOREX.r2.1HG0023480
HORVU.MOREX.r2.1HG0023540
HORVU.MOREX.r2.1HG0023650
HORVU.MOREX.r2.1HG0023790
HORVU.MOREX.r2.1HG0023830
HORVU.MOREX.r2.1HG0023880
HORVU.MOREX.r2.1HG0024080
HORVU.MOREX.r2.1HG0024140
HORVU.MOREX.r2.1HG0024500
HORVU.MOREX.r2.1HG0024540
HORVU.MOREX.r2.1HG0024590
HORVU.MOREX.r2.1HG0024620
HORVU.MOREX.r2.1HG0024660
HORVU.MOREX.r2.1HG0025150
HORVU.MOREX.r2.1HG0025240
HORVU.MOREX.r2.1HG0025250
HORVU.MOREX.r2.1HG0025280
HORVU.MOREX.r2.1HG0025300
HORVU.MOREX.r2.1HG0025320
HORVU.MOREX.r2.1HG0025620
HORVU.MOREX.r2.1HG0025820
HORVU.MOREX.r2.1HG0025840
HORVU.MOREX.r2.1HG0025850
HORVU.MOREX.r2.1HG0026180
HORVU.MOREX.r2.1HG0026230
HORVU.MOREX.r2.1HG0026290
HORVU.MOREX.r2.1HG0026410
HORVU.MOREX.r2.1HG0026430
HORVU.MOREX.r2.1HG0026490
HORVU.MOREX.r2.1HG0026520
HORVU.MOREX.r2.1HG0026700
HORVU.MOREX.r2.1HG0026750
HORVU.MOREX.r2.1HG0026820
HORVU.MOREX.r2.1HG0026900
HORVU.MOREX.r2.1HG0026930
HORVU.MOREX.r2.1HG0026950
HORVU.MOREX.r2.1HG0027030
HORVU.MOREX.r2.1HG0027120
HORVU.MOREX.r2.1HG0027260
HORVU.MOREX.r2.1HG0027280
HORVU.MOREX.r2.1HG0027380
HORVU.MOREX.r2.1HG0027480
HORVU.MOREX.r2.1HG0027640
HORVU.MOREX.r2.1HG0027750
HORVU.MOREX.r2.1HG0028090
HORVU.MOREX.r2.1HG0028170
HORVU.MOREX.r2.1HG0028200
HORVU.MOREX.r2.1HG0028230
HORVU.MOREX.r2.1HG0028340
HORVU.MOREX.r2.1HG0028440
HORVU.MOREX.r2.1HG0028560
HORVU.MOREX.r2.1HG0028570
HORVU.MOREX.r2.1HG0028590
HORVU.MOREX.r2.1HG0028630
HORVU.MOREX.r2.1HG0028650
HORVU.MOREX.r2.1HG0028710
HORVU.MOREX.r2.1HG0028720
HORVU.MOREX.r2.1HG0028770
HORVU.MOREX.r2.1HG0028790
HORVU.MOREX.r2.1HG0029110
HORVU.MOREX.r2.1HG0029160
HORVU.MOREX.r2.1HG0029240
HORVU.MOREX.r2.1HG0029360
HORVU.MOREX.r2.1HG0029450
HORVU.MOREX.r2.1HG0029460
HORVU.MOREX.r2.1HG0029540
HORVU.MOREX.r2.1HG0029940
HORVU.MOREX.r2.1HG0029960
HORVU.MOREX.r2.1HG0029970
HORVU.MOREX.r2.1HG0030100
HORVU.MOREX.r2.1HG0030150
HORVU.MOREX.r2.1HG0030190
HORVU.MOREX.r2.1HG0030210
HORVU.MOREX.r2.1HG0030220
HORVU.MOREX.r2.1HG0030230
HORVU.MOREX.r2.1HG0030250
HORVU.MOREX.r2.1HG0030270
HORVU.MOREX.r2.1HG0030300
HORVU.MOREX.r2.1HG0030350
HORVU.MOREX.r2.1HG0030360
HORVU.MOREX.r2.1HG0030460
HORVU.MOREX.r2.1HG0030470
HORVU.MOREX.r2.1HG0031030
HORVU.MOREX.r2.1HG0031080
HORVU.MOREX.r2.1HG0031180
HORVU.MOREX.r2.1HG0031450
HORVU.MOREX.r2.1HG0031470
HORVU.MOREX.r2.1HG0031690
HORVU.MOREX.r2.1HG0031860
HORVU.MOREX.r2.1HG0031880
HORVU.MOREX.r2.1HG0031900
HORVU.MOREX.r2.1HG0031930
HORVU.MOREX.r2.1HG0032070
HORVU.MOREX.r2.1HG0032080
HORVU.MOREX.r2.1HG0032340
HORVU.MOREX.r2.1HG0032390
HORVU.MOREX.r2.1HG0032420
HORVU.MOREX.r2.1HG0032520
HORVU.MOREX.r2.1HG0032590
HORVU.MOREX.r2.1HG0032660
HORVU.MOREX.r2.1HG0032670
HORVU.MOREX.r2.1HG0032680
HORVU.MOREX.r2.1HG0032830
HORVU.MOREX.r2.1HG0032850
HORVU.MOREX.r2.1HG0032940
HORVU.MOREX.r2.1HG0033090
HORVU.MOREX.r2.1HG0033100
HORVU.MOREX.r2.1HG0033150
HORVU.MOREX.r2.1HG0033270
HORVU.MOREX.r2.1HG0033380
HORVU.MOREX.r2.1HG0033390
HORVU.MOREX.r2.1HG0033460
HORVU.MOREX.r2.1HG0033510
HORVU.MOREX.r2.1HG0033530
HORVU.MOREX.r2.1HG0033580
HORVU.MOREX.r2.1HG0033690
HORVU.MOREX.r2.1HG0033750
HORVU.MOREX.r2.1HG0033800
HORVU.MOREX.r2.1HG0033810
HORVU.MOREX.r2.1HG0033830
HORVU.MOREX.r2.1HG0033860
HORVU.MOREX.r2.1HG0033880
HORVU.MOREX.r2.1HG0034150
HORVU.MOREX.r2.1HG0034160
HORVU.MOREX.r2.1HG0034220
HORVU.MOREX.r2.1HG0034250
HORVU.MOREX.r2.1HG0034280
HORVU.MOREX.r2.1HG0034530
HORVU.MOREX.r2.1HG0034700
HORVU.MOREX.r2.1HG0034740
HORVU.MOREX.r2.1HG0034750
HORVU.MOREX.r2.1HG0034800
HORVU.MOREX.r2.1HG0034980
HORVU.MOREX.r2.1HG0035040
HORVU.MOREX.r2.1HG0035050
HORVU.MOREX.r2.1HG0035260
HORVU.MOREX.r2.1HG0035290
HORVU.MOREX.r2.1HG0035340
HORVU.MOREX.r2.1HG0035490
HORVU.MOREX.r2.1HG0035540
HORVU.MOREX.r2.1HG0035590
HORVU.MOREX.r2.1HG0035670
HORVU.MOREX.r2.1HG0035690
HORVU.MOREX.r2.1HG0035720
HORVU.MOREX.r2.1HG0035800
HORVU.MOREX.r2.1HG0035920
HORVU.MOREX.r2.1HG0036020
HORVU.MOREX.r2.1HG0036120
HORVU.MOREX.r2.1HG0036230
HORVU.MOREX.r2.1HG0036440
HORVU.MOREX.r2.1HG0036500
HORVU.MOREX.r2.1HG0036710
HORVU.MOREX.r2.1HG0036740
HORVU.MOREX.r2.1HG0036750
HORVU.MOREX.r2.1HG0036810
HORVU.MOREX.r2.1HG0036820
HORVU.MOREX.r2.1HG0036860
HORVU.MOREX.r2.1HG0037040
HORVU.MOREX.r2.1HG0037050
HORVU.MOREX.r2.1HG0037070
HORVU.MOREX.r2.1HG0037100
HORVU.MOREX.r2.1HG0037110
HORVU.MOREX.r2.1HG0037120
HORVU.MOREX.r2.1HG0037130
HORVU.MOREX.r2.1HG0037190
HORVU.MOREX.r2.1HG0037240
HORVU.MOREX.r2.1HG0037280
HORVU.MOREX.r2.1HG0037320
HORVU.MOREX.r2.1HG0037330
HORVU.MOREX.r2.1HG0037520
HORVU.MOREX.r2.1HG0037530
HORVU.MOREX.r2.1HG0037610
HORVU.MOREX.r2.1HG0037640
HORVU.MOREX.r2.1HG0037750
HORVU.MOREX.r2.1HG0037790
HORVU.MOREX.r2.1HG0037990
HORVU.MOREX.r2.1HG0038050
HORVU.MOREX.r2.1HG0038260
HORVU.MOREX.r2.1HG0038310
HORVU.MOREX.r2.1HG0038340
HORVU.MOREX.r2.1HG0038400
HORVU.MOREX.r2.1HG0038570
HORVU.MOREX.r2.1HG0038580
HORVU.MOREX.r2.1HG0038710
HORVU.MOREX.r2.1HG0038720
HORVU.MOREX.r2.1HG0038730
HORVU.MOREX.r2.1HG0038750
HORVU.MOREX.r2.1HG0038950
HORVU.MOREX.r2.1HG0038960
HORVU.MOREX.r2.1HG0039050
HORVU.MOREX.r2.1HG0039060
HORVU.MOREX.r2.1HG0039110
HORVU.MOREX.r2.1HG0039170
HORVU.MOREX.r2.1HG0039290
HORVU.MOREX.r2.1HG0039540
HORVU.MOREX.r2.1HG0039580
HORVU.MOREX.r2.1HG0039600
HORVU.MOREX.r2.1HG0039730
HORVU.MOREX.r2.1HG0039830
HORVU.MOREX.r2.1HG0039850
HORVU.MOREX.r2.1HG0039970
HORVU.MOREX.r2.1HG0040060
HORVU.MOREX.r2.1HG0040070
HORVU.MOREX.r2.1HG0040100
HORVU.MOREX.r2.1HG0040130
HORVU.MOREX.r2.1HG0040290
HORVU.MOREX.r2.1HG0040330
HORVU.MOREX.r2.1HG0040480
HORVU.MOREX.r2.1HG0040490
HORVU.MOREX.r2.1HG0040610
HORVU.MOREX.r2.1HG0040620
HORVU.MOREX.r2.1HG0040680
HORVU.MOREX.r2.1HG0040700
HORVU.MOREX.r2.1HG0040710
HORVU.MOREX.r2.1HG0040840
HORVU.MOREX.r2.1HG0040850
HORVU.MOREX.r2.1HG0040860
HORVU.MOREX.r2.1HG0040870
HORVU.MOREX.r2.1HG0040930
HORVU.MOREX.r2.1HG0040940
HORVU.MOREX.r2.1HG0040990
HORVU.MOREX.r2.1HG0041030
HORVU.MOREX.r2.1HG0041270
HORVU.MOREX.r2.1HG0041280
HORVU.MOREX.r2.1HG0041290
HORVU.MOREX.r2.1HG0041310
HORVU.MOREX.r2.1HG0041360
HORVU.MOREX.r2.1HG0041440
HORVU.MOREX.r2.1HG0041590
HORVU.MOREX.r2.1HG0041600
HORVU.MOREX.r2.1HG0041620
HORVU.MOREX.r2.1HG0041680
HORVU.MOREX.r2.1HG0041730
HORVU.MOREX.r2.1HG0041740
HORVU.MOREX.r2.1HG0041760
HORVU.MOREX.r2.1HG0041820
HORVU.MOREX.r2.1HG0041850
HORVU.MOREX.r2.1HG0041940
HORVU.MOREX.r2.1HG0041990
HORVU.MOREX.r2.1HG0042090
HORVU.MOREX.r2.1HG0042120
HORVU.MOREX.r2.1HG0042220
HORVU.MOREX.r2.1HG0042240
HORVU.MOREX.r2.1HG0042250
HORVU.MOREX.r2.1HG0042280
HORVU.MOREX.r2.1HG0042330
HORVU.MOREX.r2.1HG0042580
HORVU.MOREX.r2.1HG0042660
HORVU.MOREX.r2.1HG0042700
HORVU.MOREX.r2.1HG0042770
HORVU.MOREX.r2.1HG0042810
HORVU.MOREX.r2.1HG0042830
HORVU.MOREX.r2.1HG0042930
HORVU.MOREX.r2.1HG0043060
HORVU.MOREX.r2.1HG0043100
HORVU.MOREX.r2.1HG0043280
HORVU.MOREX.r2.1HG0043550
HORVU.MOREX.r2.1HG0043580
HORVU.MOREX.r2.1HG0043590
HORVU.MOREX.r2.1HG0043620
HORVU.MOREX.r2.1HG0043640
HORVU.MOREX.r2.1HG0043650
HORVU.MOREX.r2.1HG0043680
HORVU.MOREX.r2.1HG0043710
HORVU.MOREX.r2.1HG0043720
HORVU.MOREX.r2.1HG0043730
HORVU.MOREX.r2.1HG0043750
HORVU.MOREX.r2.1HG0043780
HORVU.MOREX.r2.1HG0043830
HORVU.MOREX.r2.1HG0043920
HORVU.MOREX.r2.1HG0043930
HORVU.MOREX.r2.1HG0044030
HORVU.MOREX.r2.1HG0044040
HORVU.MOREX.r2.1HG0044090
HORVU.MOREX.r2.1HG0044190
HORVU.MOREX.r2.1HG0044400
HORVU.MOREX.r2.1HG0044560
HORVU.MOREX.r2.1HG0044600
HORVU.MOREX.r2.1HG0044730
HORVU.MOREX.r2.1HG0044770
HORVU.MOREX.r2.1HG0044820
HORVU.MOREX.r2.1HG0044970
HORVU.MOREX.r2.1HG0045220
HORVU.MOREX.r2.1HG0045240
HORVU.MOREX.r2.1HG0045410
HORVU.MOREX.r2.1HG0045440
HORVU.MOREX.r2.1HG0045470
HORVU.MOREX.r2.1HG0045500
HORVU.MOREX.r2.1HG0045530
HORVU.MOREX.r2.1HG0045540
HORVU.MOREX.r2.1HG0045610
HORVU.MOREX.r2.1HG0045620
HORVU.MOREX.r2.1HG0045730
HORVU.MOREX.r2.1HG0045760
HORVU.MOREX.r2.1HG0045810
HORVU.MOREX.r2.1HG0045820
HORVU.MOREX.r2.1HG0045850
HORVU.MOREX.r2.1HG0045890
HORVU.MOREX.r2.1HG0045910
HORVU.MOREX.r2.1HG0045960
HORVU.MOREX.r2.1HG0046030
HORVU.MOREX.r2.1HG0046050
HORVU.MOREX.r2.1HG0046060
HORVU.MOREX.r2.1HG0046160
HORVU.MOREX.r2.1HG0046180
HORVU.MOREX.r2.1HG0046190
HORVU.MOREX.r2.1HG0046210
HORVU.MOREX.r2.1HG0046270
HORVU.MOREX.r2.1HG0046350
HORVU.MOREX.r2.1HG0046370
HORVU.MOREX.r2.1HG0046540
HORVU.MOREX.r2.1HG0046700
HORVU.MOREX.r2.1HG0046800
HORVU.MOREX.r2.1HG0046820
HORVU.MOREX.r2.1HG0046830
HORVU.MOREX.r2.1HG0046850
HORVU.MOREX.r2.1HG0046990
HORVU.MOREX.r2.1HG0047000
HORVU.MOREX.r2.1HG0047040
HORVU.MOREX.r2.1HG0047050
HORVU.MOREX.r2.1HG0047060
HORVU.MOREX.r2.1HG0047070
HORVU.MOREX.r2.1HG0047090
HORVU.MOREX.r2.1HG0047110
HORVU.MOREX.r2.1HG0047120
HORVU.MOREX.r2.1HG0047440
HORVU.MOREX.r2.1HG0047520
HORVU.MOREX.r2.1HG0047540
HORVU.MOREX.r2.1HG0047650
HORVU.MOREX.r2.1HG0047940
HORVU.MOREX.r2.1HG0047960
HORVU.MOREX.r2.1HG0047970
HORVU.MOREX.r2.1HG0048070
HORVU.MOREX.r2.1HG0048300
HORVU.MOREX.r2.1HG0048520
HORVU.MOREX.r2.1HG0048540
HORVU.MOREX.r2.1HG0048580
HORVU.MOREX.r2.1HG0048610
HORVU.MOREX.r2.1HG0048630
HORVU.MOREX.r2.1HG0048780
HORVU.MOREX.r2.1HG0048850
HORVU.MOREX.r2.1HG0048860
HORVU.MOREX.r2.1HG0049020
HORVU.MOREX.r2.1HG0049060
HORVU.MOREX.r2.1HG0049170
HORVU.MOREX.r2.1HG0049200
HORVU.MOREX.r2.1HG0049280
HORVU.MOREX.r2.1HG0049310
HORVU.MOREX.r2.1HG0049350
HORVU.MOREX.r2.1HG0049370
HORVU.MOREX.r2.1HG0049440
HORVU.MOREX.r2.1HG0049530
HORVU.MOREX.r2.1HG0049570
HORVU.MOREX.r2.1HG0049640
HORVU.MOREX.r2.1HG0049650
HORVU.MOREX.r2.1HG0049710
HORVU.MOREX.r2.1HG0049750
HORVU.MOREX.r2.1HG0049770
HORVU.MOREX.r2.1HG0049810
HORVU.MOREX.r2.1HG0049880
HORVU.MOREX.r2.1HG0049900
HORVU.MOREX.r2.1HG0049950
HORVU.MOREX.r2.1HG0050020
HORVU.MOREX.r2.1HG0050060
HORVU.MOREX.r2.1HG0050080
HORVU.MOREX.r2.1HG0050100
HORVU.MOREX.r2.1HG0050130
HORVU.MOREX.r2.1HG0050170
HORVU.MOREX.r2.1HG0050270
HORVU.MOREX.r2.1HG0050340
HORVU.MOREX.r2.1HG0050410
HORVU.MOREX.r2.1HG0050420
HORVU.MOREX.r2.1HG0050430
HORVU.MOREX.r2.1HG0050460
HORVU.MOREX.r2.1HG0050480
HORVU.MOREX.r2.1HG0050500
HORVU.MOREX.r2.1HG0050510
HORVU.MOREX.r2.1HG0050550
HORVU.MOREX.r2.1HG0050610
HORVU.MOREX.r2.1HG0050780
HORVU.MOREX.r2.1HG0050800
HORVU.MOREX.r2.1HG0050840
HORVU.MOREX.r2.1HG0050900
HORVU.MOREX.r2.1HG0050980
HORVU.MOREX.r2.1HG0051000
HORVU.MOREX.r2.1HG0051010
HORVU.MOREX.r2.1HG0051020
HORVU.MOREX.r2.1HG0051320
HORVU.MOREX.r2.1HG0051410
HORVU.MOREX.r2.1HG0051440
HORVU.MOREX.r2.1HG0051570
HORVU.MOREX.r2.1HG0051620
HORVU.MOREX.r2.1HG0051630
HORVU.MOREX.r2.1HG0051640
HORVU.MOREX.r2.1HG0051650
HORVU.MOREX.r2.1HG0051710
HORVU.MOREX.r2.1HG0051740
HORVU.MOREX.r2.1HG0051860
HORVU.MOREX.r2.1HG0051920
HORVU.MOREX.r2.1HG0052290
HORVU.MOREX.r2.1HG0052300
HORVU.MOREX.r2.1HG0052330
HORVU.MOREX.r2.1HG0052400
HORVU.MOREX.r2.1HG0052410
HORVU.MOREX.r2.1HG0052560
HORVU.MOREX.r2.1HG0052590
HORVU.MOREX.r2.1HG0052860
HORVU.MOREX.r2.1HG0052870
HORVU.MOREX.r2.1HG0052920
HORVU.MOREX.r2.1HG0053020
HORVU.MOREX.r2.1HG0053170
HORVU.MOREX.r2.1HG0053180
HORVU.MOREX.r2.1HG0053340
HORVU.MOREX.r2.1HG0053440
HORVU.MOREX.r2.1HG0053600
HORVU.MOREX.r2.1HG0053790
HORVU.MOREX.r2.1HG0053810
HORVU.MOREX.r2.1HG0053840
HORVU.MOREX.r2.1HG0053860
HORVU.MOREX.r2.1HG0053910
HORVU.MOREX.r2.1HG0053920
HORVU.MOREX.r2.1HG0054160
HORVU.MOREX.r2.1HG0054340
HORVU.MOREX.r2.1HG0054360
HORVU.MOREX.r2.1HG0054550
HORVU.MOREX.r2.1HG0054560
HORVU.MOREX.r2.1HG0054750
HORVU.MOREX.r2.1HG0054760
HORVU.MOREX.r2.1HG0054850
HORVU.MOREX.r2.1HG0055060
HORVU.MOREX.r2.1HG0055100
HORVU.MOREX.r2.1HG0055200
HORVU.MOREX.r2.1HG0055220
HORVU.MOREX.r2.1HG0055250
HORVU.MOREX.r2.1HG0055450
HORVU.MOREX.r2.1HG0055460
HORVU.MOREX.r2.1HG0055570
HORVU.MOREX.r2.1HG0055800
HORVU.MOREX.r2.1HG0055940
HORVU.MOREX.r2.1HG0056000
HORVU.MOREX.r2.1HG0056030
HORVU.MOREX.r2.1HG0056040
HORVU.MOREX.r2.1HG0056070
HORVU.MOREX.r2.1HG0056100
HORVU.MOREX.r2.1HG0056140
HORVU.MOREX.r2.1HG0056150
HORVU.MOREX.r2.1HG0056180
HORVU.MOREX.r2.1HG0056240
HORVU.MOREX.r2.1HG0056250
HORVU.MOREX.r2.1HG0056320
HORVU.MOREX.r2.1HG0056390
HORVU.MOREX.r2.1HG0056600
HORVU.MOREX.r2.1HG0056620
HORVU.MOREX.r2.1HG0056670
HORVU.MOREX.r2.1HG0056720
HORVU.MOREX.r2.1HG0056950
HORVU.MOREX.r2.1HG0057000
HORVU.MOREX.r2.1HG0057070
HORVU.MOREX.r2.1HG0057260
HORVU.MOREX.r2.1HG0057320
HORVU.MOREX.r2.1HG0057510
HORVU.MOREX.r2.1HG0057550
HORVU.MOREX.r2.1HG0057620
HORVU.MOREX.r2.1HG0057810
HORVU.MOREX.r2.1HG0057820
HORVU.MOREX.r2.1HG0057910
HORVU.MOREX.r2.1HG0057920
HORVU.MOREX.r2.1HG0058040
HORVU.MOREX.r2.1HG0058060
HORVU.MOREX.r2.1HG0058150
HORVU.MOREX.r2.1HG0058180
HORVU.MOREX.r2.1HG0058350
HORVU.MOREX.r2.1HG0058360
HORVU.MOREX.r2.1HG0058430
HORVU.MOREX.r2.1HG0058580
HORVU.MOREX.r2.1HG0058710
HORVU.MOREX.r2.1HG0058750
HORVU.MOREX.r2.1HG0058860
HORVU.MOREX.r2.1HG0058890
HORVU.MOREX.r2.1HG0059030
HORVU.MOREX.r2.1HG0059060
HORVU.MOREX.r2.1HG0059090
HORVU.MOREX.r2.1HG0059130
HORVU.MOREX.r2.1HG0059150
HORVU.MOREX.r2.1HG0059160
HORVU.MOREX.r2.1HG0059170
HORVU.MOREX.r2.1HG0059200
HORVU.MOREX.r2.1HG0059240
HORVU.MOREX.r2.1HG0059260
HORVU.MOREX.r2.1HG0059310
HORVU.MOREX.r2.1HG0059440
HORVU.MOREX.r2.1HG0059510
HORVU.MOREX.r2.1HG0059540
HORVU.MOREX.r2.1HG0059580
HORVU.MOREX.r2.1HG0059670
HORVU.MOREX.r2.1HG0059750
HORVU.MOREX.r2.1HG0059820
HORVU.MOREX.r2.1HG0059880
HORVU.MOREX.r2.1HG0059890
HORVU.MOREX.r2.1HG0059900
HORVU.MOREX.r2.1HG0060050
HORVU.MOREX.r2.1HG0060060
HORVU.MOREX.r2.1HG0060080
HORVU.MOREX.r2.1HG0060170
HORVU.MOREX.r2.1HG0060190
HORVU.MOREX.r2.1HG0060220
HORVU.MOREX.r2.1HG0060440
HORVU.MOREX.r2.1HG0060450
HORVU.MOREX.r2.1HG0060460
HORVU.MOREX.r2.1HG0060470
HORVU.MOREX.r2.1HG0060510
HORVU.MOREX.r2.1HG0060690
HORVU.MOREX.r2.1HG0060710
HORVU.MOREX.r2.1HG0060800
HORVU.MOREX.r2.1HG0060840
HORVU.MOREX.r2.1HG0060880
HORVU.MOREX.r2.1HG0060900
HORVU.MOREX.r2.1HG0060910
HORVU.MOREX.r2.1HG0060990
HORVU.MOREX.r2.1HG0061190
HORVU.MOREX.r2.1HG0061210
HORVU.MOREX.r2.1HG0061220
HORVU.MOREX.r2.1HG0061310
HORVU.MOREX.r2.1HG0061370
HORVU.MOREX.r2.1HG0061410
HORVU.MOREX.r2.1HG0061660
HORVU.MOREX.r2.1HG0061700
HORVU.MOREX.r2.1HG0061740
HORVU.MOREX.r2.1HG0061800
HORVU.MOREX.r2.1HG0061820
HORVU.MOREX.r2.1HG0061930
HORVU.MOREX.r2.1HG0062030
HORVU.MOREX.r2.1HG0062220
HORVU.MOREX.r2.1HG0062250
HORVU.MOREX.r2.1HG0062260
HORVU.MOREX.r2.1HG0062370
HORVU.MOREX.r2.1HG0062410
HORVU.MOREX.r2.1HG0062440
HORVU.MOREX.r2.1HG0062500
HORVU.MOREX.r2.1HG0062530
HORVU.MOREX.r2.1HG0062600
HORVU.MOREX.r2.1HG0062610
HORVU.MOREX.r2.1HG0062640
HORVU.MOREX.r2.1HG0062680
HORVU.MOREX.r2.1HG0062840
HORVU.MOREX.r2.1HG0063070
HORVU.MOREX.r2.1HG0063080
HORVU.MOREX.r2.1HG0063140
HORVU.MOREX.r2.1HG0063260
HORVU.MOREX.r2.1HG0063310
HORVU.MOREX.r2.1HG0063340
HORVU.MOREX.r2.1HG0063390
HORVU.MOREX.r2.1HG0063400
HORVU.MOREX.r2.1HG0063650
HORVU.MOREX.r2.1HG0063710
HORVU.MOREX.r2.1HG0063860
HORVU.MOREX.r2.1HG0063900
HORVU.MOREX.r2.1HG0063930
HORVU.MOREX.r2.1HG0063940
HORVU.MOREX.r2.1HG0063980
HORVU.MOREX.r2.1HG0064000
HORVU.MOREX.r2.1HG0064090
HORVU.MOREX.r2.1HG0064100
HORVU.MOREX.r2.1HG0064240
HORVU.MOREX.r2.1HG0064250
HORVU.MOREX.r2.1HG0064290
HORVU.MOREX.r2.1HG0064400
HORVU.MOREX.r2.1HG0064440
HORVU.MOREX.r2.1HG0064550
HORVU.MOREX.r2.1HG0064610
HORVU.MOREX.r2.1HG0064720
HORVU.MOREX.r2.1HG0064900
HORVU.MOREX.r2.1HG0064940
HORVU.MOREX.r2.1HG0065060
HORVU.MOREX.r2.1HG0065080
HORVU.MOREX.r2.1HG0065230
HORVU.MOREX.r2.1HG0065250
HORVU.MOREX.r2.1HG0065460
HORVU.MOREX.r2.1HG0065480
HORVU.MOREX.r2.1HG0065490
HORVU.MOREX.r2.1HG0065550
HORVU.MOREX.r2.1HG0065600
HORVU.MOREX.r2.1HG0065610
HORVU.MOREX.r2.1HG0065710
HORVU.MOREX.r2.1HG0065910
HORVU.MOREX.r2.1HG0066030
HORVU.MOREX.r2.1HG0066050
HORVU.MOREX.r2.1HG0066160
HORVU.MOREX.r2.1HG0066180
HORVU.MOREX.r2.1HG0066190
HORVU.MOREX.r2.1HG0066320
HORVU.MOREX.r2.1HG0066400
HORVU.MOREX.r2.1HG0066540
HORVU.MOREX.r2.1HG0066810
HORVU.MOREX.r2.1HG0066840
HORVU.MOREX.r2.1HG0066850
HORVU.MOREX.r2.1HG0066870
HORVU.MOREX.r2.1HG0066880
HORVU.MOREX.r2.1HG0066910
HORVU.MOREX.r2.1HG0066990
HORVU.MOREX.r2.1HG0067070
HORVU.MOREX.r2.1HG0067080
HORVU.MOREX.r2.1HG0067220
HORVU.MOREX.r2.1HG0067230
HORVU.MOREX.r2.1HG0067330
HORVU.MOREX.r2.1HG0067390
HORVU.MOREX.r2.1HG0067440
HORVU.MOREX.r2.1HG0067490
HORVU.MOREX.r2.1HG0067540
HORVU.MOREX.r2.1HG0067800
HORVU.MOREX.r2.1HG0067820
HORVU.MOREX.r2.1HG0067830
HORVU.MOREX.r2.1HG0067840
HORVU.MOREX.r2.1HG0067900
HORVU.MOREX.r2.1HG0068050
HORVU.MOREX.r2.1HG0068060
HORVU.MOREX.r2.1HG0068170
HORVU.MOREX.r2.1HG0068180
HORVU.MOREX.r2.1HG0068190
HORVU.MOREX.r2.1HG0068210
HORVU.MOREX.r2.1HG0068260
HORVU.MOREX.r2.1HG0068300
HORVU.MOREX.r2.1HG0068360
HORVU.MOREX.r2.1HG0068420
HORVU.MOREX.r2.1HG0068430
HORVU.MOREX.r2.1HG0068660
HORVU.MOREX.r2.1HG0068680
HORVU.MOREX.r2.1HG0068760
HORVU.MOREX.r2.1HG0069000
HORVU.MOREX.r2.1HG0069020
HORVU.MOREX.r2.1HG0069240
HORVU.MOREX.r2.1HG0069310
HORVU.MOREX.r2.1HG0069600
HORVU.MOREX.r2.1HG0069640
HORVU.MOREX.r2.1HG0069670
HORVU.MOREX.r2.1HG0069860
HORVU.MOREX.r2.1HG0069880
HORVU.MOREX.r2.1HG0069900
HORVU.MOREX.r2.1HG0070040
HORVU.MOREX.r2.1HG0070130
HORVU.MOREX.r2.1HG0070240
HORVU.MOREX.r2.1HG0070250
HORVU.MOREX.r2.1HG0070310
HORVU.MOREX.r2.1HG0070480
HORVU.MOREX.r2.1HG0070680
HORVU.MOREX.r2.1HG0070850
HORVU.MOREX.r2.1HG0070950
HORVU.MOREX.r2.1HG0071020
HORVU.MOREX.r2.1HG0071270
HORVU.MOREX.r2.1HG0071510
HORVU.MOREX.r2.1HG0071600
HORVU.MOREX.r2.1HG0071620
HORVU.MOREX.r2.1HG0071830
HORVU.MOREX.r2.1HG0072050
HORVU.MOREX.r2.1HG0072140
HORVU.MOREX.r2.1HG0072340
HORVU.MOREX.r2.1HG0072360
HORVU.MOREX.r2.1HG0072390
HORVU.MOREX.r2.1HG0072640
HORVU.MOREX.r2.1HG0072650
HORVU.MOREX.r2.1HG0072750
HORVU.MOREX.r2.1HG0072790
HORVU.MOREX.r2.1HG0072860
HORVU.MOREX.r2.1HG0072870
HORVU.MOREX.r2.1HG0072890
HORVU.MOREX.r2.1HG0073120
HORVU.MOREX.r2.1HG0073210
HORVU.MOREX.r2.1HG0073230
HORVU.MOREX.r2.1HG0073250
HORVU.MOREX.r2.1HG0073450
HORVU.MOREX.r2.1HG0073500
HORVU.MOREX.r2.1HG0073610
HORVU.MOREX.r2.1HG0073640
HORVU.MOREX.r2.1HG0073720
HORVU.MOREX.r2.1HG0073730
HORVU.MOREX.r2.1HG0074000
HORVU.MOREX.r2.1HG0074100
HORVU.MOREX.r2.1HG0074110
HORVU.MOREX.r2.1HG0074170
HORVU.MOREX.r2.1HG0074190
HORVU.MOREX.r2.1HG0074230
HORVU.MOREX.r2.1HG0074290
HORVU.MOREX.r2.1HG0074360
HORVU.MOREX.r2.1HG0074680
HORVU.MOREX.r2.1HG0074900
HORVU.MOREX.r2.1HG0075440
HORVU.MOREX.r2.1HG0075470
HORVU.MOREX.r2.1HG0075480
HORVU.MOREX.r2.1HG0075830
HORVU.MOREX.r2.1HG0075860
HORVU.MOREX.r2.1HG0075920
HORVU.MOREX.r2.1HG0075930
HORVU.MOREX.r2.1HG0076110
HORVU.MOREX.r2.1HG0076180
HORVU.MOREX.r2.1HG0076420
HORVU.MOREX.r2.1HG0076430
HORVU.MOREX.r2.1HG0076590
HORVU.MOREX.r2.1HG0076620
HORVU.MOREX.r2.1HG0076630
HORVU.MOREX.r2.1HG0076790
HORVU.MOREX.r2.1HG0076840
HORVU.MOREX.r2.1HG0076860
HORVU.MOREX.r2.1HG0076870
HORVU.MOREX.r2.1HG0077240
HORVU.MOREX.r2.1HG0077330
HORVU.MOREX.r2.1HG0077380
HORVU.MOREX.r2.1HG0077450
HORVU.MOREX.r2.1HG0077480
HORVU.MOREX.r2.1HG0077490
HORVU.MOREX.r2.1HG0077750
HORVU.MOREX.r2.1HG0077760
HORVU.MOREX.r2.1HG0077880
HORVU.MOREX.r2.1HG0077910
HORVU.MOREX.r2.1HG0078100
HORVU.MOREX.r2.1HG0078140
HORVU.MOREX.r2.1HG0078180
HORVU.MOREX.r2.1HG0078200
HORVU.MOREX.r2.1HG0078240
HORVU.MOREX.r2.1HG0078260
HORVU.MOREX.r2.1HG0078370
HORVU.MOREX.r2.1HG0078380
HORVU.MOREX.r2.1HG0078400
HORVU.MOREX.r2.1HG0078410
HORVU.MOREX.r2.1HG0078440
HORVU.MOREX.r2.1HG0078510
HORVU.MOREX.r2.1HG0078540
HORVU.MOREX.r2.1HG0078650
HORVU.MOREX.r2.1HG0078670
HORVU.MOREX.r2.1HG0078680
HORVU.MOREX.r2.1HG0000050
HORVU.MOREX.r2.1HG0000060
HORVU.MOREX.r2.1HG0000070
HORVU.MOREX.r2.1HG0000110
HORVU.MOREX.r2.1HG0000300
HORVU.MOREX.r2.1HG0000440
HORVU.MOREX.r2.1HG0000450
HORVU.MOREX.r2.1HG0000470
HORVU.MOREX.r2.1HG0000670
HORVU.MOREX.r2.1HG0000700
HORVU.MOREX.r2.1HG0000730
HORVU.MOREX.r2.1HG0001030
HORVU.MOREX.r2.1HG0001530
HORVU.MOREX.r2.1HG0001550
HORVU.MOREX.r2.1HG0001580
HORVU.MOREX.r2.1HG0001610
HORVU.MOREX.r2.1HG0001870
HORVU.MOREX.r2.1HG0001980
HORVU.MOREX.r2.1HG0002150
HORVU.MOREX.r2.1HG0002170
HORVU.MOREX.r2.1HG0002180
HORVU.MOREX.r2.1HG0002200
HORVU.MOREX.r2.1HG0002310
HORVU.MOREX.r2.1HG0002320
HORVU.MOREX.r2.1HG0002330
HORVU.MOREX.r2.1HG0002790
HORVU.MOREX.r2.1HG0002860
HORVU.MOREX.r2.1HG0003050
HORVU.MOREX.r2.1HG0003080
HORVU.MOREX.r2.1HG0003170
HORVU.MOREX.r2.1HG0003210
HORVU.MOREX.r2.1HG0003470
HORVU.MOREX.r2.1HG0003600
HORVU.MOREX.r2.1HG0003620
HORVU.MOREX.r2.1HG0003750
HORVU.MOREX.r2.1HG0003760
HORVU.MOREX.r2.1HG0003870
HORVU.MOREX.r2.1HG0004070
HORVU.MOREX.r2.1HG0004130
HORVU.MOREX.r2.1HG0004360
HORVU.MOREX.r2.1HG0004680
HORVU.MOREX.r2.1HG0004700
HORVU.MOREX.r2.1HG0004730
HORVU.MOREX.r2.1HG0004760
HORVU.MOREX.r2.1HG0004800
HORVU.MOREX.r2.1HG0004820
HORVU.MOREX.r2.1HG0004840
HORVU.MOREX.r2.1HG0004850
HORVU.MOREX.r2.1HG0005350
HORVU.MOREX.r2.1HG0005640
HORVU.MOREX.r2.1HG0005800
HORVU.MOREX.r2.1HG0005810
HORVU.MOREX.r2.1HG0005860
HORVU.MOREX.r2.1HG0005880
HORVU.MOREX.r2.1HG0006010
HORVU.MOREX.r2.1HG0006200
HORVU.MOREX.r2.1HG0006370
HORVU.MOREX.r2.1HG0006390
HORVU.MOREX.r2.1HG0006400
HORVU.MOREX.r2.1HG0006540
HORVU.MOREX.r2.1HG0006590
HORVU.MOREX.r2.1HG0006710
HORVU.MOREX.r2.1HG0006720
HORVU.MOREX.r2.1HG0006980
HORVU.MOREX.r2.1HG0007010
HORVU.MOREX.r2.1HG0007120
HORVU.MOREX.r2.1HG0007340
HORVU.MOREX.r2.1HG0007670
HORVU.MOREX.r2.1HG0008110
HORVU.MOREX.r2.1HG0008270
HORVU.MOREX.r2.1HG0008320
HORVU.MOREX.r2.1HG0008340
HORVU.MOREX.r2.1HG0008370
HORVU.MOREX.r2.1HG0008380
HORVU.MOREX.r2.1HG0008420
HORVU.MOREX.r2.1HG0008890
HORVU.MOREX.r2.1HG0008900
HORVU.MOREX.r2.1HG0009100
HORVU.MOREX.r2.1HG0009140
HORVU.MOREX.r2.1HG0009190
HORVU.MOREX.r2.1HG0009240
HORVU.MOREX.r2.1HG0009250
HORVU.MOREX.r2.1HG0009310
HORVU.MOREX.r2.1HG0009340
HORVU.MOREX.r2.1HG0009350
HORVU.MOREX.r2.1HG0009630
HORVU.MOREX.r2.1HG0009930
HORVU.MOREX.r2.1HG0009970
HORVU.MOREX.r2.1HG0010090
HORVU.MOREX.r2.1HG0010610
HORVU.MOREX.r2.1HG0010640
HORVU.MOREX.r2.1HG0010650
HORVU.MOREX.r2.1HG0010840
HORVU.MOREX.r2.1HG0010950
HORVU.MOREX.r2.1HG0011040
HORVU.MOREX.r2.1HG0011120
HORVU.MOREX.r2.1HG0011150
HORVU.MOREX.r2.1HG0011170
HORVU.MOREX.r2.1HG0011270
HORVU.MOREX.r2.1HG0011280
HORVU.MOREX.r2.1HG0011320
HORVU.MOREX.r2.1HG0011460
HORVU.MOREX.r2.1HG0011610
HORVU.MOREX.r2.1HG0011690
HORVU.MOREX.r2.1HG0011860
HORVU.MOREX.r2.1HG0011910
HORVU.MOREX.r2.1HG0011920
HORVU.MOREX.r2.1HG0012390
HORVU.MOREX.r2.1HG0012470
HORVU.MOREX.r2.1HG0012660
HORVU.MOREX.r2.1HG0012710
HORVU.MOREX.r2.1HG0012760
HORVU.MOREX.r2.1HG0012890
HORVU.MOREX.r2.1HG0012970
HORVU.MOREX.r2.1HG0013080
HORVU.MOREX.r2.1HG0013090
HORVU.MOREX.r2.1HG0013170
HORVU.MOREX.r2.1HG0013190
HORVU.MOREX.r2.1HG0013320
HORVU.MOREX.r2.1HG0013500
HORVU.MOREX.r2.1HG0013600
HORVU.MOREX.r2.1HG0013610
HORVU.MOREX.r2.1HG0013730
HORVU.MOREX.r2.1HG0013750
HORVU.MOREX.r2.1HG0013790
HORVU.MOREX.r2.1HG0013890
HORVU.MOREX.r2.1HG0013930
HORVU.MOREX.r2.1HG0013960
HORVU.MOREX.r2.1HG0013980
HORVU.MOREX.r2.1HG0014140
HORVU.MOREX.r2.1HG0014200
HORVU.MOREX.r2.1HG0014210
HORVU.MOREX.r2.1HG0014220
HORVU.MOREX.r2.1HG0014240
HORVU.MOREX.r2.1HG0014250
HORVU.MOREX.r2.1HG0014290
HORVU.MOREX.r2.1HG0014460
HORVU.MOREX.r2.1HG0014560
HORVU.MOREX.r2.1HG0014570
HORVU.MOREX.r2.1HG0014600
HORVU.MOREX.r2.1HG0014740
HORVU.MOREX.r2.1HG0014840
HORVU.MOREX.r2.1HG0014990
HORVU.MOREX.r2.1HG0015080
HORVU.MOREX.r2.1HG0015140
HORVU.MOREX.r2.1HG0015280
HORVU.MOREX.r2.1HG0015410
HORVU.MOREX.r2.1HG0015630
HORVU.MOREX.r2.1HG0015640
HORVU.MOREX.r2.1HG0015690
HORVU.MOREX.r2.1HG0015930
HORVU.MOREX.r2.1HG0015940
HORVU.MOREX.r2.1HG0015970
HORVU.MOREX.r2.1HG0016090
HORVU.MOREX.r2.1HG0016100
HORVU.MOREX.r2.1HG0016190
HORVU.MOREX.r2.1HG0016430
HORVU.MOREX.r2.1HG0016540
HORVU.MOREX.r2.1HG0016580
HORVU.MOREX.r2.1HG0016590
HORVU.MOREX.r2.1HG0016720
HORVU.MOREX.r2.1HG0017170
HORVU.MOREX.r2.1HG0017270
HORVU.MOREX.r2.1HG0017300
HORVU.MOREX.r2.1HG0017350
HORVU.MOREX.r2.1HG0017360
HORVU.MOREX.r2.1HG0017380
HORVU.MOREX.r2.1HG0017460
HORVU.MOREX.r2.1HG0017470
HORVU.MOREX.r2.1HG0017700
HORVU.MOREX.r2.1HG0017770
HORVU.MOREX.r2.1HG0017800
HORVU.MOREX.r2.1HG0017820
HORVU.MOREX.r2.1HG0017850
HORVU.MOREX.r2.1HG0017950
HORVU.MOREX.r2.1HG0018040
HORVU.MOREX.r2.1HG0018100
HORVU.MOREX.r2.1HG0018140
HORVU.MOREX.r2.1HG0018200
HORVU.MOREX.r2.1HG0018520
HORVU.MOREX.r2.1HG0018790
HORVU.MOREX.r2.1HG0018930
HORVU.MOREX.r2.1HG0019020
HORVU.MOREX.r2.1HG0019040
HORVU.MOREX.r2.1HG0019050
HORVU.MOREX.r2.1HG0019070
HORVU.MOREX.r2.1HG0019110
HORVU.MOREX.r2.1HG0019300
HORVU.MOREX.r2.1HG0019520
HORVU.MOREX.r2.1HG0019550
HORVU.MOREX.r2.1HG0019570
HORVU.MOREX.r2.1HG0019710
HORVU.MOREX.r2.1HG0019760
HORVU.MOREX.r2.1HG0019860
HORVU.MOREX.r2.1HG0019910
HORVU.MOREX.r2.1HG0019930
HORVU.MOREX.r2.1HG0020240
HORVU.MOREX.r2.1HG0020380
HORVU.MOREX.r2.1HG0020460
HORVU.MOREX.r2.1HG0020490
HORVU.MOREX.r2.1HG0020560
HORVU.MOREX.r2.1HG0020600
HORVU.MOREX.r2.1HG0020650
HORVU.MOREX.r2.1HG0020950
HORVU.MOREX.r2.1HG0021120
HORVU.MOREX.r2.1HG0021190
HORVU.MOREX.r2.1HG0021200
HORVU.MOREX.r2.1HG0021230
HORVU.MOREX.r2.1HG0021290
HORVU.MOREX.r2.1HG0021470
HORVU.MOREX.r2.1HG0021480
HORVU.MOREX.r2.1HG0021720
HORVU.MOREX.r2.1HG0021830
HORVU.MOREX.r2.1HG0022130
HORVU.MOREX.r2.1HG0022140
HORVU.MOREX.r2.1HG0022170
HORVU.MOREX.r2.1HG0022240
HORVU.MOREX.r2.1HG0022270
HORVU.MOREX.r2.1HG0023100
HORVU.MOREX.r2.1HG0023110
HORVU.MOREX.r2.1HG0023160
HORVU.MOREX.r2.1HG0023180
HORVU.MOREX.r2.1HG0023190
HORVU.MOREX.r2.1HG0023220
HORVU.MOREX.r2.1HG0023250
HORVU.MOREX.r2.1HG0023270
HORVU.MOREX.r2.1HG0023360
HORVU.MOREX.r2.1HG0023390
HORVU.MOREX.r2.1HG0023690
HORVU.MOREX.r2.1HG0023760
HORVU.MOREX.r2.1HG0023970
HORVU.MOREX.r2.1HG0024040
HORVU.MOREX.r2.1HG0024100
HORVU.MOREX.r2.1HG0024240
HORVU.MOREX.r2.1HG0024490
HORVU.MOREX.r2.1HG0024530
HORVU.MOREX.r2.1HG0024570
HORVU.MOREX.r2.1HG0024740
HORVU.MOREX.r2.1HG0025040
HORVU.MOREX.r2.1HG0025130
HORVU.MOREX.r2.1HG0025170
HORVU.MOREX.r2.1HG0025270
HORVU.MOREX.r2.1HG0025520
HORVU.MOREX.r2.1HG0025600
HORVU.MOREX.r2.1HG0025640
HORVU.MOREX.r2.1HG0025670
HORVU.MOREX.r2.1HG0025700
HORVU.MOREX.r2.1HG0025750
HORVU.MOREX.r2.1HG0025800
HORVU.MOREX.r2.1HG0025880
HORVU.MOREX.r2.1HG0025950
HORVU.MOREX.r2.1HG0025960
HORVU.MOREX.r2.1HG0025970
HORVU.MOREX.r2.1HG0026080
HORVU.MOREX.r2.1HG0026100
HORVU.MOREX.r2.1HG0026120
HORVU.MOREX.r2.1HG0026140
HORVU.MOREX.r2.1HG0026150
HORVU.MOREX.r2.1HG0026160
HORVU.MOREX.r2.1HG0026350
HORVU.MOREX.r2.1HG0026400
HORVU.MOREX.r2.1HG0026610
HORVU.MOREX.r2.1HG0026810
HORVU.MOREX.r2.1HG0026840
HORVU.MOREX.r2.1HG0026880
HORVU.MOREX.r2.1HG0027000
HORVU.MOREX.r2.1HG0027100
HORVU.MOREX.r2.1HG0027180
HORVU.MOREX.r2.1HG0027190
HORVU.MOREX.r2.1HG0027200
HORVU.MOREX.r2.1HG0027350
HORVU.MOREX.r2.1HG0027460
HORVU.MOREX.r2.1HG0027540
HORVU.MOREX.r2.1HG0027550
HORVU.MOREX.r2.1HG0027560
HORVU.MOREX.r2.1HG0027620
HORVU.MOREX.r2.1HG0028190
HORVU.MOREX.r2.1HG0028260
HORVU.MOREX.r2.1HG0028390
HORVU.MOREX.r2.1HG0028620
HORVU.MOREX.r2.1HG0028700
HORVU.MOREX.r2.1HG0028780
HORVU.MOREX.r2.1HG0028810
HORVU.MOREX.r2.1HG0028950
HORVU.MOREX.r2.1HG0029010
HORVU.MOREX.r2.1HG0029020
HORVU.MOREX.r2.1HG0029250
HORVU.MOREX.r2.1HG0029280
HORVU.MOREX.r2.1HG0029530
HORVU.MOREX.r2.1HG0029580
HORVU.MOREX.r2.1HG0029600
HORVU.MOREX.r2.1HG0029630
HORVU.MOREX.r2.1HG0029650
HORVU.MOREX.r2.1HG0029870
HORVU.MOREX.r2.1HG0029980
HORVU.MOREX.r2.1HG0030110
HORVU.MOREX.r2.1HG0030330
HORVU.MOREX.r2.1HG0030340
HORVU.MOREX.r2.1HG0030370
HORVU.MOREX.r2.1HG0030770
HORVU.MOREX.r2.1HG0030810
HORVU.MOREX.r2.1HG0030890
HORVU.MOREX.r2.1HG0030900
HORVU.MOREX.r2.1HG0030950
HORVU.MOREX.r2.1HG0031440
HORVU.MOREX.r2.1HG0031630
HORVU.MOREX.r2.1HG0031680
HORVU.MOREX.r2.1HG0031720
HORVU.MOREX.r2.1HG0031740
HORVU.MOREX.r2.1HG0031750
HORVU.MOREX.r2.1HG0031800
HORVU.MOREX.r2.1HG0031870
HORVU.MOREX.r2.1HG0032020
HORVU.MOREX.r2.1HG0032360
HORVU.MOREX.r2.1HG0032530
HORVU.MOREX.r2.1HG0032560
HORVU.MOREX.r2.1HG0032620
HORVU.MOREX.r2.1HG0032750
HORVU.MOREX.r2.1HG0032770
HORVU.MOREX.r2.1HG0032810
HORVU.MOREX.r2.1HG0032840
HORVU.MOREX.r2.1HG0032960
HORVU.MOREX.r2.1HG0033000
HORVU.MOREX.r2.1HG0033010
HORVU.MOREX.r2.1HG0033180
HORVU.MOREX.r2.1HG0033320
HORVU.MOREX.r2.1HG0033440
HORVU.MOREX.r2.1HG0033660
HORVU.MOREX.r2.1HG0033790
HORVU.MOREX.r2.1HG0033960
HORVU.MOREX.r2.1HG0034090
HORVU.MOREX.r2.1HG0034100
HORVU.MOREX.r2.1HG0034210
HORVU.MOREX.r2.1HG0034290
HORVU.MOREX.r2.1HG0034330
HORVU.MOREX.r2.1HG0034380
HORVU.MOREX.r2.1HG0034390
HORVU.MOREX.r2.1HG0034430
HORVU.MOREX.r2.1HG0034520
HORVU.MOREX.r2.1HG0034570
HORVU.MOREX.r2.1HG0034610
HORVU.MOREX.r2.1HG0034640
HORVU.MOREX.r2.1HG0034670
HORVU.MOREX.r2.1HG0034680
HORVU.MOREX.r2.1HG0034900
HORVU.MOREX.r2.1HG0034940
HORVU.MOREX.r2.1HG0035070
HORVU.MOREX.r2.1HG0035110
HORVU.MOREX.r2.1HG0035320
HORVU.MOREX.r2.1HG0035700
HORVU.MOREX.r2.1HG0035730
HORVU.MOREX.r2.1HG0035740
HORVU.MOREX.r2.1HG0035810
HORVU.MOREX.r2.1HG0035900
HORVU.MOREX.r2.1HG0035910
HORVU.MOREX.r2.1HG0036010
HORVU.MOREX.r2.1HG0036100
HORVU.MOREX.r2.1HG0036220
HORVU.MOREX.r2.1HG0036240
HORVU.MOREX.r2.1HG0036430
HORVU.MOREX.r2.1HG0036490
HORVU.MOREX.r2.1HG0036560
HORVU.MOREX.r2.1HG0036570
HORVU.MOREX.r2.1HG0036690
HORVU.MOREX.r2.1HG0036700
HORVU.MOREX.r2.1HG0036770
HORVU.MOREX.r2.1HG0036790
HORVU.MOREX.r2.1HG0037080
HORVU.MOREX.r2.1HG0037140
HORVU.MOREX.r2.1HG0037200
HORVU.MOREX.r2.1HG0037230
HORVU.MOREX.r2.1HG0037340
HORVU.MOREX.r2.1HG0037400
HORVU.MOREX.r2.1HG0037430
HORVU.MOREX.r2.1HG0037450
HORVU.MOREX.r2.1HG0037470
HORVU.MOREX.r2.1HG0037500
HORVU.MOREX.r2.1HG0037780
HORVU.MOREX.r2.1HG0037930
HORVU.MOREX.r2.1HG0038020
HORVU.MOREX.r2.1HG0038160
HORVU.MOREX.r2.1HG0038250
HORVU.MOREX.r2.1HG0038330
HORVU.MOREX.r2.1HG0038350
HORVU.MOREX.r2.1HG0038370
HORVU.MOREX.r2.1HG0038510
HORVU.MOREX.r2.1HG0038670
HORVU.MOREX.r2.1HG0038680
HORVU.MOREX.r2.1HG0038800
HORVU.MOREX.r2.1HG0038860
HORVU.MOREX.r2.1HG0038870
HORVU.MOREX.r2.1HG0039120
HORVU.MOREX.r2.1HG0039130
HORVU.MOREX.r2.1HG0039140
HORVU.MOREX.r2.1HG0039160
HORVU.MOREX.r2.1HG0039180
HORVU.MOREX.r2.1HG0039270
HORVU.MOREX.r2.1HG0039530
HORVU.MOREX.r2.1HG0039590
HORVU.MOREX.r2.1HG0039610
HORVU.MOREX.r2.1HG0039750
HORVU.MOREX.r2.1HG0039760
HORVU.MOREX.r2.1HG0039940
HORVU.MOREX.r2.1HG0039950
HORVU.MOREX.r2.1HG0039980
HORVU.MOREX.r2.1HG0040340
HORVU.MOREX.r2.1HG0040430
HORVU.MOREX.r2.1HG0040760
HORVU.MOREX.r2.1HG0040770
HORVU.MOREX.r2.1HG0040780
HORVU.MOREX.r2.1HG0040820
HORVU.MOREX.r2.1HG0040920
HORVU.MOREX.r2.1HG0041020
HORVU.MOREX.r2.1HG0041150
HORVU.MOREX.r2.1HG0041220
HORVU.MOREX.r2.1HG0041260
HORVU.MOREX.r2.1HG0041320
HORVU.MOREX.r2.1HG0041330
HORVU.MOREX.r2.1HG0041390
HORVU.MOREX.r2.1HG0041400
HORVU.MOREX.r2.1HG0041430
HORVU.MOREX.r2.1HG0041530
HORVU.MOREX.r2.1HG0041570
HORVU.MOREX.r2.1HG0041630
HORVU.MOREX.r2.1HG0041670
HORVU.MOREX.r2.1HG0041690
HORVU.MOREX.r2.1HG0041750
HORVU.MOREX.r2.1HG0041770
HORVU.MOREX.r2.1HG0041780
HORVU.MOREX.r2.1HG0041800
HORVU.MOREX.r2.1HG0041840
HORVU.MOREX.r2.1HG0041860
HORVU.MOREX.r2.1HG0041900
HORVU.MOREX.r2.1HG0041910
HORVU.MOREX.r2.1HG0041930
HORVU.MOREX.r2.1HG0041950
HORVU.MOREX.r2.1HG0041980
HORVU.MOREX.r2.1HG0042020
HORVU.MOREX.r2.1HG0042030
HORVU.MOREX.r2.1HG0042050
HORVU.MOREX.r2.1HG0042060
HORVU.MOREX.r2.1HG0042080
HORVU.MOREX.r2.1HG0042180
HORVU.MOREX.r2.1HG0042190
HORVU.MOREX.r2.1HG0042270
HORVU.MOREX.r2.1HG0042350
HORVU.MOREX.r2.1HG0042370
HORVU.MOREX.r2.1HG0042450
HORVU.MOREX.r2.1HG0042520
HORVU.MOREX.r2.1HG0042790
HORVU.MOREX.r2.1HG0042800
HORVU.MOREX.r2.1HG0042870
HORVU.MOREX.r2.1HG0043160
HORVU.MOREX.r2.1HG0043300
HORVU.MOREX.r2.1HG0043390
HORVU.MOREX.r2.1HG0043400
HORVU.MOREX.r2.1HG0043560
HORVU.MOREX.r2.1HG0043610
HORVU.MOREX.r2.1HG0043630
HORVU.MOREX.r2.1HG0043700
HORVU.MOREX.r2.1HG0043760
HORVU.MOREX.r2.1HG0043790
HORVU.MOREX.r2.1HG0043840
HORVU.MOREX.r2.1HG0043850
HORVU.MOREX.r2.1HG0043860
HORVU.MOREX.r2.1HG0044020
HORVU.MOREX.r2.1HG0044130
HORVU.MOREX.r2.1HG0044330
HORVU.MOREX.r2.1HG0044380
HORVU.MOREX.r2.1HG0044410
HORVU.MOREX.r2.1HG0044470
HORVU.MOREX.r2.1HG0044550
HORVU.MOREX.r2.1HG0044670
HORVU.MOREX.r2.1HG0044700
HORVU.MOREX.r2.1HG0044720
HORVU.MOREX.r2.1HG0044740
HORVU.MOREX.r2.1HG0044760
HORVU.MOREX.r2.1HG0044790
HORVU.MOREX.r2.1HG0044960
HORVU.MOREX.r2.1HG0044990
HORVU.MOREX.r2.1HG0045020
HORVU.MOREX.r2.1HG0045170
HORVU.MOREX.r2.1HG0045280
HORVU.MOREX.r2.1HG0045370
HORVU.MOREX.r2.1HG0045390
HORVU.MOREX.r2.1HG0045400
HORVU.MOREX.r2.1HG0045430
HORVU.MOREX.r2.1HG0045490
HORVU.MOREX.r2.1HG0045520
HORVU.MOREX.r2.1HG0045580
HORVU.MOREX.r2.1HG0045690
HORVU.MOREX.r2.1HG0045700
HORVU.MOREX.r2.1HG0045830
HORVU.MOREX.r2.1HG0045900
HORVU.MOREX.r2.1HG0045970
HORVU.MOREX.r2.1HG0045980
HORVU.MOREX.r2.1HG0046110
HORVU.MOREX.r2.1HG0046120
HORVU.MOREX.r2.1HG0046130
HORVU.MOREX.r2.1HG0046170
HORVU.MOREX.r2.1HG0046200
HORVU.MOREX.r2.1HG0046280
HORVU.MOREX.r2.1HG0046310
HORVU.MOREX.r2.1HG0046360
HORVU.MOREX.r2.1HG0046390
HORVU.MOREX.r2.1HG0046450
HORVU.MOREX.r2.1HG0046460
HORVU.MOREX.r2.1HG0046590
HORVU.MOREX.r2.1HG0046650
HORVU.MOREX.r2.1HG0046680
HORVU.MOREX.r2.1HG0046860
HORVU.MOREX.r2.1HG0046940
HORVU.MOREX.r2.1HG0046960
HORVU.MOREX.r2.1HG0046970
HORVU.MOREX.r2.1HG0047080
HORVU.MOREX.r2.1HG0047140
HORVU.MOREX.r2.1HG0047280
HORVU.MOREX.r2.1HG0047430
HORVU.MOREX.r2.1HG0047450
HORVU.MOREX.r2.1HG0047480
HORVU.MOREX.r2.1HG0047490
HORVU.MOREX.r2.1HG0047510
HORVU.MOREX.r2.1HG0047530
HORVU.MOREX.r2.1HG0047600
HORVU.MOREX.r2.1HG0047660
HORVU.MOREX.r2.1HG0047730
HORVU.MOREX.r2.1HG0047840
HORVU.MOREX.r2.1HG0047850
HORVU.MOREX.r2.1HG0047870
HORVU.MOREX.r2.1HG0047910
HORVU.MOREX.r2.1HG0047930
HORVU.MOREX.r2.1HG0048000
HORVU.MOREX.r2.1HG0048170
HORVU.MOREX.r2.1HG0048180
HORVU.MOREX.r2.1HG0048640
HORVU.MOREX.r2.1HG0048660
HORVU.MOREX.r2.1HG0048720
HORVU.MOREX.r2.1HG0048790
HORVU.MOREX.r2.1HG0048800
HORVU.MOREX.r2.1HG0048820
HORVU.MOREX.r2.1HG0048880
HORVU.MOREX.r2.1HG0048950
HORVU.MOREX.r2.1HG0048990
HORVU.MOREX.r2.1HG0049090
HORVU.MOREX.r2.1HG0049160
HORVU.MOREX.r2.1HG0049290
HORVU.MOREX.r2.1HG0049330
HORVU.MOREX.r2.1HG0049380
HORVU.MOREX.r2.1HG0049420
HORVU.MOREX.r2.1HG0049550
HORVU.MOREX.r2.1HG0049580
HORVU.MOREX.r2.1HG0049610
HORVU.MOREX.r2.1HG0049700
HORVU.MOREX.r2.1HG0049760
HORVU.MOREX.r2.1HG0049800
HORVU.MOREX.r2.1HG0049830
HORVU.MOREX.r2.1HG0049920
HORVU.MOREX.r2.1HG0049930
HORVU.MOREX.r2.1HG0050050
HORVU.MOREX.r2.1HG0050110
HORVU.MOREX.r2.1HG0050160
HORVU.MOREX.r2.1HG0050400
HORVU.MOREX.r2.1HG0050540
HORVU.MOREX.r2.1HG0050560
HORVU.MOREX.r2.1HG0050620
HORVU.MOREX.r2.1HG0050640
HORVU.MOREX.r2.1HG0050690
HORVU.MOREX.r2.1HG0050700
HORVU.MOREX.r2.1HG0050720
HORVU.MOREX.r2.1HG0050740
HORVU.MOREX.r2.1HG0050820
HORVU.MOREX.r2.1HG0050830
HORVU.MOREX.r2.1HG0050850
HORVU.MOREX.r2.1HG0050860
HORVU.MOREX.r2.1HG0050870
HORVU.MOREX.r2.1HG0051050
HORVU.MOREX.r2.1HG0051220
HORVU.MOREX.r2.1HG0051240
HORVU.MOREX.r2.1HG0051260
HORVU.MOREX.r2.1HG0051300
HORVU.MOREX.r2.1HG0051330
HORVU.MOREX.r2.1HG0051370
HORVU.MOREX.r2.1HG0051390
HORVU.MOREX.r2.1HG0051400
HORVU.MOREX.r2.1HG0051480
HORVU.MOREX.r2.1HG0051610
HORVU.MOREX.r2.1HG0051730
HORVU.MOREX.r2.1HG0051910
HORVU.MOREX.r2.1HG0051960
HORVU.MOREX.r2.1HG0052160
HORVU.MOREX.r2.1HG0052170
HORVU.MOREX.r2.1HG0052210
HORVU.MOREX.r2.1HG0052320
HORVU.MOREX.r2.1HG0052390
HORVU.MOREX.r2.1HG0052620
HORVU.MOREX.r2.1HG0052630
HORVU.MOREX.r2.1HG0052730
HORVU.MOREX.r2.1HG0052770
HORVU.MOREX.r2.1HG0052890
HORVU.MOREX.r2.1HG0052930
HORVU.MOREX.r2.1HG0052940
HORVU.MOREX.r2.1HG0053120
HORVU.MOREX.r2.1HG0053540
HORVU.MOREX.r2.1HG0053580
HORVU.MOREX.r2.1HG0053750
HORVU.MOREX.r2.1HG0053820
HORVU.MOREX.r2.1HG0053830
HORVU.MOREX.r2.1HG0053900
HORVU.MOREX.r2.1HG0053940
HORVU.MOREX.r2.1HG0054130
HORVU.MOREX.r2.1HG0054270
HORVU.MOREX.r2.1HG0054280
HORVU.MOREX.r2.1HG0054310
HORVU.MOREX.r2.1HG0054590
HORVU.MOREX.r2.1HG0054640
HORVU.MOREX.r2.1HG0054680
HORVU.MOREX.r2.1HG0054790
HORVU.MOREX.r2.1HG0054840
HORVU.MOREX.r2.1HG0055160
HORVU.MOREX.r2.1HG0055180
HORVU.MOREX.r2.1HG0055270
HORVU.MOREX.r2.1HG0055320
HORVU.MOREX.r2.1HG0055330
HORVU.MOREX.r2.1HG0055400
HORVU.MOREX.r2.1HG0055410
HORVU.MOREX.r2.1HG0055470
HORVU.MOREX.r2.1HG0055530
HORVU.MOREX.r2.1HG0055630
HORVU.MOREX.r2.1HG0055660
HORVU.MOREX.r2.1HG0055730
HORVU.MOREX.r2.1HG0055760
HORVU.MOREX.r2.1HG0056190
HORVU.MOREX.r2.1HG0056220
HORVU.MOREX.r2.1HG0056230
HORVU.MOREX.r2.1HG0056310
HORVU.MOREX.r2.1HG0056360
HORVU.MOREX.r2.1HG0056370
HORVU.MOREX.r2.1HG0056380
HORVU.MOREX.r2.1HG0056460
HORVU.MOREX.r2.1HG0056730
HORVU.MOREX.r2.1HG0056760
HORVU.MOREX.r2.1HG0056940
HORVU.MOREX.r2.1HG0056970
HORVU.MOREX.r2.1HG0056980
HORVU.MOREX.r2.1HG0057120
HORVU.MOREX.r2.1HG0057210
HORVU.MOREX.r2.1HG0057610
HORVU.MOREX.r2.1HG0057640
HORVU.MOREX.r2.1HG0057650
HORVU.MOREX.r2.1HG0057780
HORVU.MOREX.r2.1HG0057800
HORVU.MOREX.r2.1HG0057890
HORVU.MOREX.r2.1HG0058080
HORVU.MOREX.r2.1HG0058210
HORVU.MOREX.r2.1HG0058340
HORVU.MOREX.r2.1HG0058460
HORVU.MOREX.r2.1HG0058530
HORVU.MOREX.r2.1HG0058570
HORVU.MOREX.r2.1HG0058760
HORVU.MOREX.r2.1HG0058820
HORVU.MOREX.r2.1HG0058840
HORVU.MOREX.r2.1HG0058910
HORVU.MOREX.r2.1HG0059040
HORVU.MOREX.r2.1HG0059100
HORVU.MOREX.r2.1HG0059110
HORVU.MOREX.r2.1HG0059290
HORVU.MOREX.r2.1HG0059340
HORVU.MOREX.r2.1HG0059460
HORVU.MOREX.r2.1HG0059520
HORVU.MOREX.r2.1HG0059590
HORVU.MOREX.r2.1HG0059680
HORVU.MOREX.r2.1HG0059730
HORVU.MOREX.r2.1HG0059760
HORVU.MOREX.r2.1HG0059780
HORVU.MOREX.r2.1HG0059850
HORVU.MOREX.r2.1HG0059910
HORVU.MOREX.r2.1HG0059970
HORVU.MOREX.r2.1HG0059990
HORVU.MOREX.r2.1HG0060010
HORVU.MOREX.r2.1HG0060280
HORVU.MOREX.r2.1HG0060290
HORVU.MOREX.r2.1HG0060360
HORVU.MOREX.r2.1HG0060380
HORVU.MOREX.r2.1HG0060420
HORVU.MOREX.r2.1HG0060650
HORVU.MOREX.r2.1HG0060720
HORVU.MOREX.r2.1HG0060770
HORVU.MOREX.r2.1HG0060940
HORVU.MOREX.r2.1HG0060950
HORVU.MOREX.r2.1HG0060960
HORVU.MOREX.r2.1HG0061000
HORVU.MOREX.r2.1HG0061060
HORVU.MOREX.r2.1HG0061100
HORVU.MOREX.r2.1HG0061110
HORVU.MOREX.r2.1HG0061200
HORVU.MOREX.r2.1HG0061230
HORVU.MOREX.r2.1HG0061240
HORVU.MOREX.r2.1HG0061420
HORVU.MOREX.r2.1HG0061440
HORVU.MOREX.r2.1HG0062040
HORVU.MOREX.r2.1HG0062050
HORVU.MOREX.r2.1HG0062060
HORVU.MOREX.r2.1HG0062140
HORVU.MOREX.r2.1HG0062240
HORVU.MOREX.r2.1HG0062350
HORVU.MOREX.r2.1HG0062360
HORVU.MOREX.r2.1HG0062430
HORVU.MOREX.r2.1HG0062540
HORVU.MOREX.r2.1HG0062770
HORVU.MOREX.r2.1HG0062850
HORVU.MOREX.r2.1HG0062950
HORVU.MOREX.r2.1HG0063060
HORVU.MOREX.r2.1HG0063090
HORVU.MOREX.r2.1HG0063120
HORVU.MOREX.r2.1HG0063130
HORVU.MOREX.r2.1HG0063230
HORVU.MOREX.r2.1HG0063320
HORVU.MOREX.r2.1HG0063350
HORVU.MOREX.r2.1HG0063490
HORVU.MOREX.r2.1HG0063550
HORVU.MOREX.r2.1HG0063570
HORVU.MOREX.r2.1HG0063590
HORVU.MOREX.r2.1HG0063810
HORVU.MOREX.r2.1HG0063830
HORVU.MOREX.r2.1HG0063950
HORVU.MOREX.r2.1HG0063960
HORVU.MOREX.r2.1HG0064110
HORVU.MOREX.r2.1HG0064120
HORVU.MOREX.r2.1HG0064170
HORVU.MOREX.r2.1HG0064220
HORVU.MOREX.r2.1HG0064370
HORVU.MOREX.r2.1HG0064380
HORVU.MOREX.r2.1HG0064390
HORVU.MOREX.r2.1HG0064410
HORVU.MOREX.r2.1HG0064450
HORVU.MOREX.r2.1HG0064460
HORVU.MOREX.r2.1HG0064470
HORVU.MOREX.r2.1HG0064540
HORVU.MOREX.r2.1HG0064580
HORVU.MOREX.r2.1HG0064590
HORVU.MOREX.r2.1HG0064910
HORVU.MOREX.r2.1HG0064930
HORVU.MOREX.r2.1HG0065070
HORVU.MOREX.r2.1HG0065130
HORVU.MOREX.r2.1HG0065200
HORVU.MOREX.r2.1HG0065340
HORVU.MOREX.r2.1HG0065350
HORVU.MOREX.r2.1HG0065470
HORVU.MOREX.r2.1HG0065510
HORVU.MOREX.r2.1HG0065590
HORVU.MOREX.r2.1HG0065640
HORVU.MOREX.r2.1HG0065680
HORVU.MOREX.r2.1HG0065700
HORVU.MOREX.r2.1HG0065860
HORVU.MOREX.r2.1HG0065900
HORVU.MOREX.r2.1HG0065920
HORVU.MOREX.r2.1HG0066040
HORVU.MOREX.r2.1HG0066090
HORVU.MOREX.r2.1HG0066220
HORVU.MOREX.r2.1HG0066270
HORVU.MOREX.r2.1HG0066370
HORVU.MOREX.r2.1HG0066380
HORVU.MOREX.r2.1HG0066390
HORVU.MOREX.r2.1HG0066440
HORVU.MOREX.r2.1HG0066490
HORVU.MOREX.r2.1HG0066640
HORVU.MOREX.r2.1HG0066670
HORVU.MOREX.r2.1HG0066740
HORVU.MOREX.r2.1HG0066820
HORVU.MOREX.r2.1HG0066830
HORVU.MOREX.r2.1HG0066860
HORVU.MOREX.r2.1HG0066930
HORVU.MOREX.r2.1HG0066980
HORVU.MOREX.r2.1HG0067020
HORVU.MOREX.r2.1HG0067040
HORVU.MOREX.r2.1HG0067250
HORVU.MOREX.r2.1HG0067380
HORVU.MOREX.r2.1HG0067500
HORVU.MOREX.r2.1HG0067510
HORVU.MOREX.r2.1HG0067660
HORVU.MOREX.r2.1HG0067720
HORVU.MOREX.r2.1HG0067760
HORVU.MOREX.r2.1HG0067770
HORVU.MOREX.r2.1HG0067910
HORVU.MOREX.r2.1HG0067920
HORVU.MOREX.r2.1HG0067960
HORVU.MOREX.r2.1HG0068370
HORVU.MOREX.r2.1HG0068540
HORVU.MOREX.r2.1HG0068690
HORVU.MOREX.r2.1HG0068730
HORVU.MOREX.r2.1HG0068890
HORVU.MOREX.r2.1HG0068940
HORVU.MOREX.r2.1HG0068990
HORVU.MOREX.r2.1HG0069010
HORVU.MOREX.r2.1HG0069030
HORVU.MOREX.r2.1HG0069320
HORVU.MOREX.r2.1HG0069330
HORVU.MOREX.r2.1HG0069340
HORVU.MOREX.r2.1HG0069360
HORVU.MOREX.r2.1HG0069390
HORVU.MOREX.r2.1HG0069410
HORVU.MOREX.r2.1HG0069450
HORVU.MOREX.r2.1HG0069480
HORVU.MOREX.r2.1HG0069830
HORVU.MOREX.r2.1HG0070060
HORVU.MOREX.r2.1HG0070120
HORVU.MOREX.r2.1HG0070320
HORVU.MOREX.r2.1HG0070410
HORVU.MOREX.r2.1HG0070530
HORVU.MOREX.r2.1HG0070570
HORVU.MOREX.r2.1HG0070690
HORVU.MOREX.r2.1HG0070810
HORVU.MOREX.r2.1HG0070820
HORVU.MOREX.r2.1HG0070900
HORVU.MOREX.r2.1HG0071030
HORVU.MOREX.r2.1HG0071130
HORVU.MOREX.r2.1HG0071140
HORVU.MOREX.r2.1HG0071160
HORVU.MOREX.r2.1HG0071210
HORVU.MOREX.r2.1HG0071380
HORVU.MOREX.r2.1HG0071390
HORVU.MOREX.r2.1HG0071810
HORVU.MOREX.r2.1HG0071820
HORVU.MOREX.r2.1HG0071970
HORVU.MOREX.r2.1HG0072040
HORVU.MOREX.r2.1HG0072060
HORVU.MOREX.r2.1HG0072070
HORVU.MOREX.r2.1HG0072120
HORVU.MOREX.r2.1HG0072150
HORVU.MOREX.r2.1HG0072300
HORVU.MOREX.r2.1HG0072350
HORVU.MOREX.r2.1HG0072380
HORVU.MOREX.r2.1HG0072490
HORVU.MOREX.r2.1HG0072630
HORVU.MOREX.r2.1HG0072930
HORVU.MOREX.r2.1HG0072940
HORVU.MOREX.r2.1HG0072950
HORVU.MOREX.r2.1HG0073100
HORVU.MOREX.r2.1HG0073220
HORVU.MOREX.r2.1HG0073390
HORVU.MOREX.r2.1HG0073430
HORVU.MOREX.r2.1HG0073710
HORVU.MOREX.r2.1HG0073880
HORVU.MOREX.r2.1HG0073890
HORVU.MOREX.r2.1HG0073990
HORVU.MOREX.r2.1HG0074020
HORVU.MOREX.r2.1HG0074260
HORVU.MOREX.r2.1HG0074270
HORVU.MOREX.r2.1HG0074340
HORVU.MOREX.r2.1HG0074420
HORVU.MOREX.r2.1HG0074470
HORVU.MOREX.r2.1HG0074530
HORVU.MOREX.r2.1HG0074570
HORVU.MOREX.r2.1HG0074580
HORVU.MOREX.r2.1HG0074590
HORVU.MOREX.r2.1HG0074650
HORVU.MOREX.r2.1HG0074660
HORVU.MOREX.r2.1HG0074710
HORVU.MOREX.r2.1HG0074840
HORVU.MOREX.r2.1HG0074850
HORVU.MOREX.r2.1HG0074870
HORVU.MOREX.r2.1HG0074920
HORVU.MOREX.r2.1HG0074930
HORVU.MOREX.r2.1HG0075050
HORVU.MOREX.r2.1HG0075070
HORVU.MOREX.r2.1HG0075200
HORVU.MOREX.r2.1HG0075260
HORVU.MOREX.r2.1HG0075280
HORVU.MOREX.r2.1HG0075300
HORVU.MOREX.r2.1HG0075340
HORVU.MOREX.r2.1HG0075390
HORVU.MOREX.r2.1HG0075530
HORVU.MOREX.r2.1HG0075630
HORVU.MOREX.r2.1HG0075760
HORVU.MOREX.r2.1HG0075780
HORVU.MOREX.r2.1HG0075820
HORVU.MOREX.r2.1HG0075880
HORVU.MOREX.r2.1HG0075910
HORVU.MOREX.r2.1HG0076310
HORVU.MOREX.r2.1HG0076500
HORVU.MOREX.r2.1HG0076570
HORVU.MOREX.r2.1HG0076670
HORVU.MOREX.r2.1HG0076680
HORVU.MOREX.r2.1HG0076730
HORVU.MOREX.r2.1HG0076820
HORVU.MOREX.r2.1HG0076850
HORVU.MOREX.r2.1HG0076960
HORVU.MOREX.r2.1HG0076970
HORVU.MOREX.r2.1HG0077020
HORVU.MOREX.r2.1HG0077090
HORVU.MOREX.r2.1HG0077130
HORVU.MOREX.r2.1HG0077180
HORVU.MOREX.r2.1HG0077230
HORVU.MOREX.r2.1HG0077250
HORVU.MOREX.r2.1HG0077280
HORVU.MOREX.r2.1HG0077340
HORVU.MOREX.r2.1HG0077400
HORVU.MOREX.r2.1HG0077430
HORVU.MOREX.r2.1HG0077460
HORVU.MOREX.r2.1HG0077500
HORVU.MOREX.r2.1HG0077870
HORVU.MOREX.r2.1HG0078080
HORVU.MOREX.r2.1HG0078090
HORVU.MOREX.r2.1HG0078230
HORVU.MOREX.r2.1HG0078290
HORVU.MOREX.r2.1HG0078310
HORVU.MOREX.r2.1HG0078320
HORVU.MOREX.r2.1HG0078340
HORVU.MOREX.r2.1HG0078350
HORVU.MOREX.r2.1HG0078390
HORVU.MOREX.r2.1HG0078430
HORVU.MOREX.r2.1HG0078550
HORVU.MOREX.r2.1HG0078560
HORVU.MOREX.r2.1HG0078570
HORVU.MOREX.r2.1HG0078610
HORVU.MOREX.r2.1HG0078630
HORVU.MOREX.r2.1HG0078660
HORVU.MOREX.r2.1HG0078760
HORVU.MOREX.r2.1HG0078770
HORVU.MOREX.r2.2HG0078890
HORVU.MOREX.r2.2HG0078940
HORVU.MOREX.r2.2HG0079030
HORVU.MOREX.r2.2HG0079060
HORVU.MOREX.r2.2HG0079180
HORVU.MOREX.r2.2HG0079230
HORVU.MOREX.r2.2HG0079410
HORVU.MOREX.r2.2HG0079560
HORVU.MOREX.r2.2HG0079620
HORVU.MOREX.r2.2HG0079630
HORVU.MOREX.r2.2HG0079710
HORVU.MOREX.r2.2HG0079740
HORVU.MOREX.r2.2HG0079750
HORVU.MOREX.r2.2HG0079820
HORVU.MOREX.r2.2HG0080040
HORVU.MOREX.r2.2HG0080150
HORVU.MOREX.r2.2HG0080180
HORVU.MOREX.r2.2HG0080240
HORVU.MOREX.r2.2HG0080400
HORVU.MOREX.r2.2HG0080460
HORVU.MOREX.r2.2HG0080470
HORVU.MOREX.r2.2HG0080730
HORVU.MOREX.r2.2HG0080870
HORVU.MOREX.r2.2HG0080930
HORVU.MOREX.r2.2HG0081060
HORVU.MOREX.r2.2HG0081260
HORVU.MOREX.r2.2HG0081500
HORVU.MOREX.r2.2HG0082200
HORVU.MOREX.r2.2HG0082310
HORVU.MOREX.r2.2HG0082320
HORVU.MOREX.r2.2HG0082370
HORVU.MOREX.r2.2HG0082400
HORVU.MOREX.r2.2HG0082640
HORVU.MOREX.r2.2HG0082790
HORVU.MOREX.r2.2HG0083020
HORVU.MOREX.r2.2HG0083030
HORVU.MOREX.r2.2HG0083180
HORVU.MOREX.r2.2HG0083320
HORVU.MOREX.r2.2HG0083460
HORVU.MOREX.r2.2HG0083470
HORVU.MOREX.r2.2HG0083490
HORVU.MOREX.r2.2HG0083500
HORVU.MOREX.r2.2HG0083630
HORVU.MOREX.r2.2HG0084300
HORVU.MOREX.r2.2HG0084360
HORVU.MOREX.r2.2HG0084400
HORVU.MOREX.r2.2HG0084440
HORVU.MOREX.r2.2HG0084510
HORVU.MOREX.r2.2HG0084620
HORVU.MOREX.r2.2HG0085190
HORVU.MOREX.r2.2HG0085290
HORVU.MOREX.r2.2HG0085420
HORVU.MOREX.r2.2HG0085490
HORVU.MOREX.r2.2HG0085540
HORVU.MOREX.r2.2HG0085750
HORVU.MOREX.r2.2HG0085790
HORVU.MOREX.r2.2HG0085820
HORVU.MOREX.r2.2HG0085830
HORVU.MOREX.r2.2HG0085840
HORVU.MOREX.r2.2HG0085890
HORVU.MOREX.r2.2HG0085900
HORVU.MOREX.r2.2HG0085910
HORVU.MOREX.r2.2HG0085920
HORVU.MOREX.r2.2HG0085990
HORVU.MOREX.r2.2HG0086030
HORVU.MOREX.r2.2HG0086040
HORVU.MOREX.r2.2HG0086050
HORVU.MOREX.r2.2HG0086070
HORVU.MOREX.r2.2HG0086160
HORVU.MOREX.r2.2HG0086170
HORVU.MOREX.r2.2HG0086340
HORVU.MOREX.r2.2HG0086400
HORVU.MOREX.r2.2HG0086490
HORVU.MOREX.r2.2HG0086560
HORVU.MOREX.r2.2HG0086650
HORVU.MOREX.r2.2HG0086730
HORVU.MOREX.r2.2HG0086740
HORVU.MOREX.r2.2HG0086750
HORVU.MOREX.r2.2HG0086760
HORVU.MOREX.r2.2HG0086810
HORVU.MOREX.r2.2HG0087070
HORVU.MOREX.r2.2HG0087210
HORVU.MOREX.r2.2HG0087370
HORVU.MOREX.r2.2HG0087480
HORVU.MOREX.r2.2HG0087530
HORVU.MOREX.r2.2HG0087540
HORVU.MOREX.r2.2HG0087750
HORVU.MOREX.r2.2HG0087760
HORVU.MOREX.r2.2HG0088000
HORVU.MOREX.r2.2HG0088180
HORVU.MOREX.r2.2HG0088270
HORVU.MOREX.r2.2HG0088320
HORVU.MOREX.r2.2HG0088330
HORVU.MOREX.r2.2HG0088340
HORVU.MOREX.r2.2HG0088440
HORVU.MOREX.r2.2HG0088480
HORVU.MOREX.r2.2HG0088510
HORVU.MOREX.r2.2HG0088660
HORVU.MOREX.r2.2HG0088730
HORVU.MOREX.r2.2HG0088780
HORVU.MOREX.r2.2HG0089200
HORVU.MOREX.r2.2HG0089210
HORVU.MOREX.r2.2HG0089230
HORVU.MOREX.r2.2HG0089240
HORVU.MOREX.r2.2HG0089330
HORVU.MOREX.r2.2HG0089510
HORVU.MOREX.r2.2HG0089520
HORVU.MOREX.r2.2HG0089530
HORVU.MOREX.r2.2HG0089710
HORVU.MOREX.r2.2HG0089740
HORVU.MOREX.r2.2HG0089840
HORVU.MOREX.r2.2HG0090020
HORVU.MOREX.r2.2HG0090250
HORVU.MOREX.r2.2HG0090260
HORVU.MOREX.r2.2HG0090280
HORVU.MOREX.r2.2HG0090320
HORVU.MOREX.r2.2HG0090510
HORVU.MOREX.r2.2HG0090830
HORVU.MOREX.r2.2HG0090840
HORVU.MOREX.r2.2HG0090850
HORVU.MOREX.r2.2HG0090870
HORVU.MOREX.r2.2HG0091040
HORVU.MOREX.r2.2HG0091190
HORVU.MOREX.r2.2HG0091280
HORVU.MOREX.r2.2HG0091380
HORVU.MOREX.r2.2HG0091470
HORVU.MOREX.r2.2HG0091540
HORVU.MOREX.r2.2HG0091770
HORVU.MOREX.r2.2HG0091800
[truncated: 14,159 more rows]

## Sheet: Table S5 M0 H3K9ac
Table S5. Genes marked with H3K9ac in M0
HORVU.MOREX.r2.1HG0000020
HORVU.MOREX.r2.1HG0000030
HORVU.MOREX.r2.1HG0000040
HORVU.MOREX.r2.1HG0000080
HORVU.MOREX.r2.1HG0000090
HORVU.MOREX.r2.1HG0000280
HORVU.MOREX.r2.1HG0000580
HORVU.MOREX.r2.1HG0000590
HORVU.MOREX.r2.1HG0000740
HORVU.MOREX.r2.1HG0001540
HORVU.MOREX.r2.1HG0001690
HORVU.MOREX.r2.1HG0001710
HORVU.MOREX.r2.1HG0001910
HORVU.MOREX.r2.1HG0001920
HORVU.MOREX.r2.1HG0001940
HORVU.MOREX.r2.1HG0002020
HORVU.MOREX.r2.1HG0002030
HORVU.MOREX.r2.1HG0002190
HORVU.MOREX.r2.1HG0002750
HORVU.MOREX.r2.1HG0003010
HORVU.MOREX.r2.1HG0003220
HORVU.MOREX.r2.1HG0003270
HORVU.MOREX.r2.1HG0003500
HORVU.MOREX.r2.1HG0003630
HORVU.MOREX.r2.1HG0003740
HORVU.MOREX.r2.1HG0003770
HORVU.MOREX.r2.1HG0003920
HORVU.MOREX.r2.1HG0004060
HORVU.MOREX.r2.1HG0004230
HORVU.MOREX.r2.1HG0004390
HORVU.MOREX.r2.1HG0004810
HORVU.MOREX.r2.1HG0004930
HORVU.MOREX.r2.1HG0004940
HORVU.MOREX.r2.1HG0004960
HORVU.MOREX.r2.1HG0005300
HORVU.MOREX.r2.1HG0005390
HORVU.MOREX.r2.1HG0005960
HORVU.MOREX.r2.1HG0006020
HORVU.MOREX.r2.1HG0006240
HORVU.MOREX.r2.1HG0006290
HORVU.MOREX.r2.1HG0006570
HORVU.MOREX.r2.1HG0006620
HORVU.MOREX.r2.1HG0006660
HORVU.MOREX.r2.1HG0007070
HORVU.MOREX.r2.1HG0007110
HORVU.MOREX.r2.1HG0007520
HORVU.MOREX.r2.1HG0007760
HORVU.MOREX.r2.1HG0007850
HORVU.MOREX.r2.1HG0008410
HORVU.MOREX.r2.1HG0008430
HORVU.MOREX.r2.1HG0008450
HORVU.MOREX.r2.1HG0008510
HORVU.MOREX.r2.1HG0008630
HORVU.MOREX.r2.1HG0008650
HORVU.MOREX.r2.1HG0008710
HORVU.MOREX.r2.1HG0008730
HORVU.MOREX.r2.1HG0008760
HORVU.MOREX.r2.1HG0008810
HORVU.MOREX.r2.1HG0008840
HORVU.MOREX.r2.1HG0008950
HORVU.MOREX.r2.1HG0009080
HORVU.MOREX.r2.1HG0009110
HORVU.MOREX.r2.1HG0009170
HORVU.MOREX.r2.1HG0009180
HORVU.MOREX.r2.1HG0009200
HORVU.MOREX.r2.1HG0009540
HORVU.MOREX.r2.1HG0009910
HORVU.MOREX.r2.1HG0010080
HORVU.MOREX.r2.1HG0010170
HORVU.MOREX.r2.1HG0010390
HORVU.MOREX.r2.1HG0010410
HORVU.MOREX.r2.1HG0010500
HORVU.MOREX.r2.1HG0010510
HORVU.MOREX.r2.1HG0010520
HORVU.MOREX.r2.1HG0010660
HORVU.MOREX.r2.1HG0011080
HORVU.MOREX.r2.1HG0011100
HORVU.MOREX.r2.1HG0011160
HORVU.MOREX.r2.1HG0011230
HORVU.MOREX.r2.1HG0011240
HORVU.MOREX.r2.1HG0011250
HORVU.MOREX.r2.1HG0011520
HORVU.MOREX.r2.1HG0011720
HORVU.MOREX.r2.1HG0012070
HORVU.MOREX.r2.1HG0012110
HORVU.MOREX.r2.1HG0012130
HORVU.MOREX.r2.1HG0012450
HORVU.MOREX.r2.1HG0012650
HORVU.MOREX.r2.1HG0012920
HORVU.MOREX.r2.1HG0012960
HORVU.MOREX.r2.1HG0012980
HORVU.MOREX.r2.1HG0012990
HORVU.MOREX.r2.1HG0013270
HORVU.MOREX.r2.1HG0013310
HORVU.MOREX.r2.1HG0013780
HORVU.MOREX.r2.1HG0014060
HORVU.MOREX.r2.1HG0014080
HORVU.MOREX.r2.1HG0014120
HORVU.MOREX.r2.1HG0014170
HORVU.MOREX.r2.1HG0014550
HORVU.MOREX.r2.1HG0014870
HORVU.MOREX.r2.1HG0015010
HORVU.MOREX.r2.1HG0015060
HORVU.MOREX.r2.1HG0015100
HORVU.MOREX.r2.1HG0015120
HORVU.MOREX.r2.1HG0015150
HORVU.MOREX.r2.1HG0015160
HORVU.MOREX.r2.1HG0015250
HORVU.MOREX.r2.1HG0015920
HORVU.MOREX.r2.1HG0015950
HORVU.MOREX.r2.1HG0016060
HORVU.MOREX.r2.1HG0016110
HORVU.MOREX.r2.1HG0016200
HORVU.MOREX.r2.1HG0016510
HORVU.MOREX.r2.1HG0016570
HORVU.MOREX.r2.1HG0016770
HORVU.MOREX.r2.1HG0016780
HORVU.MOREX.r2.1HG0017050
HORVU.MOREX.r2.1HG0017110
HORVU.MOREX.r2.1HG0017310
HORVU.MOREX.r2.1HG0017390
HORVU.MOREX.r2.1HG0017400
HORVU.MOREX.r2.1HG0017490
HORVU.MOREX.r2.1HG0017530
HORVU.MOREX.r2.1HG0017670
HORVU.MOREX.r2.1HG0017810
HORVU.MOREX.r2.1HG0017990
HORVU.MOREX.r2.1HG0018080
HORVU.MOREX.r2.1HG0018170
HORVU.MOREX.r2.1HG0018560
HORVU.MOREX.r2.1HG0018630
HORVU.MOREX.r2.1HG0018640
HORVU.MOREX.r2.1HG0018700
HORVU.MOREX.r2.1HG0018780
HORVU.MOREX.r2.1HG0018800
HORVU.MOREX.r2.1HG0018860
HORVU.MOREX.r2.1HG0018900
HORVU.MOREX.r2.1HG0018910
HORVU.MOREX.r2.1HG0018960
HORVU.MOREX.r2.1HG0018970
HORVU.MOREX.r2.1HG0019030
HORVU.MOREX.r2.1HG0019100
HORVU.MOREX.r2.1HG0019120
HORVU.MOREX.r2.1HG0019210
HORVU.MOREX.r2.1HG0019270
HORVU.MOREX.r2.1HG0019310
HORVU.MOREX.r2.1HG0019510
HORVU.MOREX.r2.1HG0019660
HORVU.MOREX.r2.1HG0019680
HORVU.MOREX.r2.1HG0019780
HORVU.MOREX.r2.1HG0019790
HORVU.MOREX.r2.1HG0020140
HORVU.MOREX.r2.1HG0020280
HORVU.MOREX.r2.1HG0020320
HORVU.MOREX.r2.1HG0020470
HORVU.MOREX.r2.1HG0020540
HORVU.MOREX.r2.1HG0020610
HORVU.MOREX.r2.1HG0020750
HORVU.MOREX.r2.1HG0020770
HORVU.MOREX.r2.1HG0021270
HORVU.MOREX.r2.1HG0021310
HORVU.MOREX.r2.1HG0021320
HORVU.MOREX.r2.1HG0021340
HORVU.MOREX.r2.1HG0021370
HORVU.MOREX.r2.1HG0021410
HORVU.MOREX.r2.1HG0021490
HORVU.MOREX.r2.1HG0021740
HORVU.MOREX.r2.1HG0021810
HORVU.MOREX.r2.1HG0021840
HORVU.MOREX.r2.1HG0021990
HORVU.MOREX.r2.1HG0022070
HORVU.MOREX.r2.1HG0022090
HORVU.MOREX.r2.1HG0022310
HORVU.MOREX.r2.1HG0022960
HORVU.MOREX.r2.1HG0022990
HORVU.MOREX.r2.1HG0023170
HORVU.MOREX.r2.1HG0023280
HORVU.MOREX.r2.1HG0023330
HORVU.MOREX.r2.1HG0023480
HORVU.MOREX.r2.1HG0023540
HORVU.MOREX.r2.1HG0023650
HORVU.MOREX.r2.1HG0023830
HORVU.MOREX.r2.1HG0024080
HORVU.MOREX.r2.1HG0024500
HORVU.MOREX.r2.1HG0024540
HORVU.MOREX.r2.1HG0024590
HORVU.MOREX.r2.1HG0024620
HORVU.MOREX.r2.1HG0025060
HORVU.MOREX.r2.1HG0025150
HORVU.MOREX.r2.1HG0025280
HORVU.MOREX.r2.1HG0025320
HORVU.MOREX.r2.1HG0025340
HORVU.MOREX.r2.1HG0025620
HORVU.MOREX.r2.1HG0025820
HORVU.MOREX.r2.1HG0026180
HORVU.MOREX.r2.1HG0026230
HORVU.MOREX.r2.1HG0026290
HORVU.MOREX.r2.1HG0026490
HORVU.MOREX.r2.1HG0026520
HORVU.MOREX.r2.1HG0026700
HORVU.MOREX.r2.1HG0026750
HORVU.MOREX.r2.1HG0026900
HORVU.MOREX.r2.1HG0026930
HORVU.MOREX.r2.1HG0026950
HORVU.MOREX.r2.1HG0027030
HORVU.MOREX.r2.1HG0027120
HORVU.MOREX.r2.1HG0027260
HORVU.MOREX.r2.1HG0027280
HORVU.MOREX.r2.1HG0027480
HORVU.MOREX.r2.1HG0027640
HORVU.MOREX.r2.1HG0027750
HORVU.MOREX.r2.1HG0028090
HORVU.MOREX.r2.1HG0028200
HORVU.MOREX.r2.1HG0028230
HORVU.MOREX.r2.1HG0028440
HORVU.MOREX.r2.1HG0028560
HORVU.MOREX.r2.1HG0028570
HORVU.MOREX.r2.1HG0028630
HORVU.MOREX.r2.1HG0028650
HORVU.MOREX.r2.1HG0028710
HORVU.MOREX.r2.1HG0028720
HORVU.MOREX.r2.1HG0028770
HORVU.MOREX.r2.1HG0029110
HORVU.MOREX.r2.1HG0029160
HORVU.MOREX.r2.1HG0029240
HORVU.MOREX.r2.1HG0029360
HORVU.MOREX.r2.1HG0029420
HORVU.MOREX.r2.1HG0029450
HORVU.MOREX.r2.1HG0029460
HORVU.MOREX.r2.1HG0029500
HORVU.MOREX.r2.1HG0029540
HORVU.MOREX.r2.1HG0029940
HORVU.MOREX.r2.1HG0029960
HORVU.MOREX.r2.1HG0029970
HORVU.MOREX.r2.1HG0030100
HORVU.MOREX.r2.1HG0030150
HORVU.MOREX.r2.1HG0030160
HORVU.MOREX.r2.1HG0030230
HORVU.MOREX.r2.1HG0030250
HORVU.MOREX.r2.1HG0030350
HORVU.MOREX.r2.1HG0030360
HORVU.MOREX.r2.1HG0030460
HORVU.MOREX.r2.1HG0030470
HORVU.MOREX.r2.1HG0030920
HORVU.MOREX.r2.1HG0030970
HORVU.MOREX.r2.1HG0031030
HORVU.MOREX.r2.1HG0031180
HORVU.MOREX.r2.1HG0031450
HORVU.MOREX.r2.1HG0031690
HORVU.MOREX.r2.1HG0031860
HORVU.MOREX.r2.1HG0031880
HORVU.MOREX.r2.1HG0031900
HORVU.MOREX.r2.1HG0031930
HORVU.MOREX.r2.1HG0032070
HORVU.MOREX.r2.1HG0032080
HORVU.MOREX.r2.1HG0032340
HORVU.MOREX.r2.1HG0032390
HORVU.MOREX.r2.1HG0032520
HORVU.MOREX.r2.1HG0032660
HORVU.MOREX.r2.1HG0032680
HORVU.MOREX.r2.1HG0032850
HORVU.MOREX.r2.1HG0032940
HORVU.MOREX.r2.1HG0033090
HORVU.MOREX.r2.1HG0033150
HORVU.MOREX.r2.1HG0033270
HORVU.MOREX.r2.1HG0033380
HORVU.MOREX.r2.1HG0033390
HORVU.MOREX.r2.1HG0033460
HORVU.MOREX.r2.1HG0033510
HORVU.MOREX.r2.1HG0033530
HORVU.MOREX.r2.1HG0033580
HORVU.MOREX.r2.1HG0033750
HORVU.MOREX.r2.1HG0033800
HORVU.MOREX.r2.1HG0033810
HORVU.MOREX.r2.1HG0033830
HORVU.MOREX.r2.1HG0033860
HORVU.MOREX.r2.1HG0033880
HORVU.MOREX.r2.1HG0033970
HORVU.MOREX.r2.1HG0034160
HORVU.MOREX.r2.1HG0034220
HORVU.MOREX.r2.1HG0034250
HORVU.MOREX.r2.1HG0034530
HORVU.MOREX.r2.1HG0034630
HORVU.MOREX.r2.1HG0034800
HORVU.MOREX.r2.1HG0034980
HORVU.MOREX.r2.1HG0035040
HORVU.MOREX.r2.1HG0035050
HORVU.MOREX.r2.1HG0035260
HORVU.MOREX.r2.1HG0035290
HORVU.MOREX.r2.1HG0035340
HORVU.MOREX.r2.1HG0035360
HORVU.MOREX.r2.1HG0035540
HORVU.MOREX.r2.1HG0035590
HORVU.MOREX.r2.1HG0035670
HORVU.MOREX.r2.1HG0035690
HORVU.MOREX.r2.1HG0035720
HORVU.MOREX.r2.1HG0035800
HORVU.MOREX.r2.1HG0036020
HORVU.MOREX.r2.1HG0036120
HORVU.MOREX.r2.1HG0036210
HORVU.MOREX.r2.1HG0036440
HORVU.MOREX.r2.1HG0036750
HORVU.MOREX.r2.1HG0036820
HORVU.MOREX.r2.1HG0036860
HORVU.MOREX.r2.1HG0036980
HORVU.MOREX.r2.1HG0036990
HORVU.MOREX.r2.1HG0037040
HORVU.MOREX.r2.1HG0037050
HORVU.MOREX.r2.1HG0037070
HORVU.MOREX.r2.1HG0037100
HORVU.MOREX.r2.1HG0037110
HORVU.MOREX.r2.1HG0037120
HORVU.MOREX.r2.1HG0037130
HORVU.MOREX.r2.1HG0037240
HORVU.MOREX.r2.1HG0037280
HORVU.MOREX.r2.1HG0037640
HORVU.MOREX.r2.1HG0037750
HORVU.MOREX.r2.1HG0037760
HORVU.MOREX.r2.1HG0037790
HORVU.MOREX.r2.1HG0037990
HORVU.MOREX.r2.1HG0038050
HORVU.MOREX.r2.1HG0038310
HORVU.MOREX.r2.1HG0038340
HORVU.MOREX.r2.1HG0038400
HORVU.MOREX.r2.1HG0038570
HORVU.MOREX.r2.1HG0038720
HORVU.MOREX.r2.1HG0038730
HORVU.MOREX.r2.1HG0038750
HORVU.MOREX.r2.1HG0038950
HORVU.MOREX.r2.1HG0038960
HORVU.MOREX.r2.1HG0039050
HORVU.MOREX.r2.1HG0039060
HORVU.MOREX.r2.1HG0039110
HORVU.MOREX.r2.1HG0039170
HORVU.MOREX.r2.1HG0039290
HORVU.MOREX.r2.1HG0039520
HORVU.MOREX.r2.1HG0039540
HORVU.MOREX.r2.1HG0039730
HORVU.MOREX.r2.1HG0039850
HORVU.MOREX.r2.1HG0040060
HORVU.MOREX.r2.1HG0040070
HORVU.MOREX.r2.1HG0040100
HORVU.MOREX.r2.1HG0040130
HORVU.MOREX.r2.1HG0040290
HORVU.MOREX.r2.1HG0040330
HORVU.MOREX.r2.1HG0040490
HORVU.MOREX.r2.1HG0040530
HORVU.MOREX.r2.1HG0040620
HORVU.MOREX.r2.1HG0040640
HORVU.MOREX.r2.1HG0040660
HORVU.MOREX.r2.1HG0040680
HORVU.MOREX.r2.1HG0040700
HORVU.MOREX.r2.1HG0040710
HORVU.MOREX.r2.1HG0040840
HORVU.MOREX.r2.1HG0040850
HORVU.MOREX.r2.1HG0040870
HORVU.MOREX.r2.1HG0040930
HORVU.MOREX.r2.1HG0040940
HORVU.MOREX.r2.1HG0040990
HORVU.MOREX.r2.1HG0041030
HORVU.MOREX.r2.1HG0041270
HORVU.MOREX.r2.1HG0041280
HORVU.MOREX.r2.1HG0041290
HORVU.MOREX.r2.1HG0041360
HORVU.MOREX.r2.1HG0041620
HORVU.MOREX.r2.1HG0041730
HORVU.MOREX.r2.1HG0041740
HORVU.MOREX.r2.1HG0041760
HORVU.MOREX.r2.1HG0041850
HORVU.MOREX.r2.1HG0041940
HORVU.MOREX.r2.1HG0041990
HORVU.MOREX.r2.1HG0042090
HORVU.MOREX.r2.1HG0042120
HORVU.MOREX.r2.1HG0042220
HORVU.MOREX.r2.1HG0042240
HORVU.MOREX.r2.1HG0042250
HORVU.MOREX.r2.1HG0042280
HORVU.MOREX.r2.1HG0042330
HORVU.MOREX.r2.1HG0042340
HORVU.MOREX.r2.1HG0042700
HORVU.MOREX.r2.1HG0042810
HORVU.MOREX.r2.1HG0042830
HORVU.MOREX.r2.1HG0042930
HORVU.MOREX.r2.1HG0043040
HORVU.MOREX.r2.1HG0043060
HORVU.MOREX.r2.1HG0043070
HORVU.MOREX.r2.1HG0043190
HORVU.MOREX.r2.1HG0043480
HORVU.MOREX.r2.1HG0043550
HORVU.MOREX.r2.1HG0043580
HORVU.MOREX.r2.1HG0043590
HORVU.MOREX.r2.1HG0043620
HORVU.MOREX.r2.1HG0043640
HORVU.MOREX.r2.1HG0043680
HORVU.MOREX.r2.1HG0043920
HORVU.MOREX.r2.1HG0044040
HORVU.MOREX.r2.1HG0044400
HORVU.MOREX.r2.1HG0044560
HORVU.MOREX.r2.1HG0044600
HORVU.MOREX.r2.1HG0044770
HORVU.MOREX.r2.1HG0044820
HORVU.MOREX.r2.1HG0044900
HORVU.MOREX.r2.1HG0044970
HORVU.MOREX.r2.1HG0045220
HORVU.MOREX.r2.1HG0045410
HORVU.MOREX.r2.1HG0045440
HORVU.MOREX.r2.1HG0045450
HORVU.MOREX.r2.1HG0045500
HORVU.MOREX.r2.1HG0045610
HORVU.MOREX.r2.1HG0045620
HORVU.MOREX.r2.1HG0045760
HORVU.MOREX.r2.1HG0045810
HORVU.MOREX.r2.1HG0045820
HORVU.MOREX.r2.1HG0045850
HORVU.MOREX.r2.1HG0045890
HORVU.MOREX.r2.1HG0045910
HORVU.MOREX.r2.1HG0046050
HORVU.MOREX.r2.1HG0046160
HORVU.MOREX.r2.1HG0046210
HORVU.MOREX.r2.1HG0046350
HORVU.MOREX.r2.1HG0046370
HORVU.MOREX.r2.1HG0046540
HORVU.MOREX.r2.1HG0046700
HORVU.MOREX.r2.1HG0046800
HORVU.MOREX.r2.1HG0046820
HORVU.MOREX.r2.1HG0046830
HORVU.MOREX.r2.1HG0046850
HORVU.MOREX.r2.1HG0047000
HORVU.MOREX.r2.1HG0047040
HORVU.MOREX.r2.1HG0047050
HORVU.MOREX.r2.1HG0047070
HORVU.MOREX.r2.1HG0047090
HORVU.MOREX.r2.1HG0047120
HORVU.MOREX.r2.1HG0047170
HORVU.MOREX.r2.1HG0047520
HORVU.MOREX.r2.1HG0047540
HORVU.MOREX.r2.1HG0047960
HORVU.MOREX.r2.1HG0047970
HORVU.MOREX.r2.1HG0048070
HORVU.MOREX.r2.1HG0048300
HORVU.MOREX.r2.1HG0048540
HORVU.MOREX.r2.1HG0048580
HORVU.MOREX.r2.1HG0048610
HORVU.MOREX.r2.1HG0048630
HORVU.MOREX.r2.1HG0048780
HORVU.MOREX.r2.1HG0048850
HORVU.MOREX.r2.1HG0049020
HORVU.MOREX.r2.1HG0049060
HORVU.MOREX.r2.1HG0049150
HORVU.MOREX.r2.1HG0049170
HORVU.MOREX.r2.1HG0049200
HORVU.MOREX.r2.1HG0049310
HORVU.MOREX.r2.1HG0049370
HORVU.MOREX.r2.1HG0049570
HORVU.MOREX.r2.1HG0049650
HORVU.MOREX.r2.1HG0049710
HORVU.MOREX.r2.1HG0049750
HORVU.MOREX.r2.1HG0049810
HORVU.MOREX.r2.1HG0049880
HORVU.MOREX.r2.1HG0049900
HORVU.MOREX.r2.1HG0049960
HORVU.MOREX.r2.1HG0050020
HORVU.MOREX.r2.1HG0050060
HORVU.MOREX.r2.1HG0050080
HORVU.MOREX.r2.1HG0050130
HORVU.MOREX.r2.1HG0050150
HORVU.MOREX.r2.1HG0050170
HORVU.MOREX.r2.1HG0050270
HORVU.MOREX.r2.1HG0050340
HORVU.MOREX.r2.1HG0050420
HORVU.MOREX.r2.1HG0050430
HORVU.MOREX.r2.1HG0050460
HORVU.MOREX.r2.1HG0050500
HORVU.MOREX.r2.1HG0050550
HORVU.MOREX.r2.1HG0050800
HORVU.MOREX.r2.1HG0050900
HORVU.MOREX.r2.1HG0051010
HORVU.MOREX.r2.1HG0051020
HORVU.MOREX.r2.1HG0051060
HORVU.MOREX.r2.1HG0051080
HORVU.MOREX.r2.1HG0051160
HORVU.MOREX.r2.1HG0051280
HORVU.MOREX.r2.1HG0051320
HORVU.MOREX.r2.1HG0051570
HORVU.MOREX.r2.1HG0051630
HORVU.MOREX.r2.1HG0051640
HORVU.MOREX.r2.1HG0051650
HORVU.MOREX.r2.1HG0051660
HORVU.MOREX.r2.1HG0051740
HORVU.MOREX.r2.1HG0051860
HORVU.MOREX.r2.1HG0051920
HORVU.MOREX.r2.1HG0051950
HORVU.MOREX.r2.1HG0052290
HORVU.MOREX.r2.1HG0052310
HORVU.MOREX.r2.1HG0052400
HORVU.MOREX.r2.1HG0052410
HORVU.MOREX.r2.1HG0052560
HORVU.MOREX.r2.1HG0052590
HORVU.MOREX.r2.1HG0052870
HORVU.MOREX.r2.1HG0052920
HORVU.MOREX.r2.1HG0053020
HORVU.MOREX.r2.1HG0053170
HORVU.MOREX.r2.1HG0053340
HORVU.MOREX.r2.1HG0053420
HORVU.MOREX.r2.1HG0053790
HORVU.MOREX.r2.1HG0053860
HORVU.MOREX.r2.1HG0053910
HORVU.MOREX.r2.1HG0053920
HORVU.MOREX.r2.1HG0054160
HORVU.MOREX.r2.1HG0054750
HORVU.MOREX.r2.1HG0054760
HORVU.MOREX.r2.1HG0054820
HORVU.MOREX.r2.1HG0054850
HORVU.MOREX.r2.1HG0055060
HORVU.MOREX.r2.1HG0055100
HORVU.MOREX.r2.1HG0055220
HORVU.MOREX.r2.1HG0055250
HORVU.MOREX.r2.1HG0055800
HORVU.MOREX.r2.1HG0055940
HORVU.MOREX.r2.1HG0056000
HORVU.MOREX.r2.1HG0056030
HORVU.MOREX.r2.1HG0056040
HORVU.MOREX.r2.1HG0056070
HORVU.MOREX.r2.1HG0056090
HORVU.MOREX.r2.1HG0056100
HORVU.MOREX.r2.1HG0056110
HORVU.MOREX.r2.1HG0056140
HORVU.MOREX.r2.1HG0056180
HORVU.MOREX.r2.1HG0056240
HORVU.MOREX.r2.1HG0056300
HORVU.MOREX.r2.1HG0056390
HORVU.MOREX.r2.1HG0056600
HORVU.MOREX.r2.1HG0056620
HORVU.MOREX.r2.1HG0056790
HORVU.MOREX.r2.1HG0056950
HORVU.MOREX.r2.1HG0057000
HORVU.MOREX.r2.1HG0057070
HORVU.MOREX.r2.1HG0057310
HORVU.MOREX.r2.1HG0057320
HORVU.MOREX.r2.1HG0057350
HORVU.MOREX.r2.1HG0057360
HORVU.MOREX.r2.1HG0057550
HORVU.MOREX.r2.1HG0057630
HORVU.MOREX.r2.1HG0057680
HORVU.MOREX.r2.1HG0057810
HORVU.MOREX.r2.1HG0057920
HORVU.MOREX.r2.1HG0058040
HORVU.MOREX.r2.1HG0058060
HORVU.MOREX.r2.1HG0058180
HORVU.MOREX.r2.1HG0058350
HORVU.MOREX.r2.1HG0058360
HORVU.MOREX.r2.1HG0058580
HORVU.MOREX.r2.1HG0058750
HORVU.MOREX.r2.1HG0058930
HORVU.MOREX.r2.1HG0059030
HORVU.MOREX.r2.1HG0059060
HORVU.MOREX.r2.1HG0059130
HORVU.MOREX.r2.1HG0059170
HORVU.MOREX.r2.1HG0059200
HORVU.MOREX.r2.1HG0059240
HORVU.MOREX.r2.1HG0059250
HORVU.MOREX.r2.1HG0059260
HORVU.MOREX.r2.1HG0059440
HORVU.MOREX.r2.1HG0059510
HORVU.MOREX.r2.1HG0059540
HORVU.MOREX.r2.1HG0059580
HORVU.MOREX.r2.1HG0059670
HORVU.MOREX.r2.1HG0059750
HORVU.MOREX.r2.1HG0059820
HORVU.MOREX.r2.1HG0059880
HORVU.MOREX.r2.1HG0059890
HORVU.MOREX.r2.1HG0059900
HORVU.MOREX.r2.1HG0060050
HORVU.MOREX.r2.1HG0060060
HORVU.MOREX.r2.1HG0060080
HORVU.MOREX.r2.1HG0060190
HORVU.MOREX.r2.1HG0060450
HORVU.MOREX.r2.1HG0060460
HORVU.MOREX.r2.1HG0060470
HORVU.MOREX.r2.1HG0060510
HORVU.MOREX.r2.1HG0060690
HORVU.MOREX.r2.1HG0060710
HORVU.MOREX.r2.1HG0060880
HORVU.MOREX.r2.1HG0060900
HORVU.MOREX.r2.1HG0060910
HORVU.MOREX.r2.1HG0060990
HORVU.MOREX.r2.1HG0061190
HORVU.MOREX.r2.1HG0061210
HORVU.MOREX.r2.1HG0061220
HORVU.MOREX.r2.1HG0061310
HORVU.MOREX.r2.1HG0061370
HORVU.MOREX.r2.1HG0061410
HORVU.MOREX.r2.1HG0061520
HORVU.MOREX.r2.1HG0061580
HORVU.MOREX.r2.1HG0061660
HORVU.MOREX.r2.1HG0061700
HORVU.MOREX.r2.1HG0061740
HORVU.MOREX.r2.1HG0061800
HORVU.MOREX.r2.1HG0061930
HORVU.MOREX.r2.1HG0062030
HORVU.MOREX.r2.1HG0062110
HORVU.MOREX.r2.1HG0062250
HORVU.MOREX.r2.1HG0062370
HORVU.MOREX.r2.1HG0062410
HORVU.MOREX.r2.1HG0062630
HORVU.MOREX.r2.1HG0062680
HORVU.MOREX.r2.1HG0063070
HORVU.MOREX.r2.1HG0063080
HORVU.MOREX.r2.1HG0063140
HORVU.MOREX.r2.1HG0063260
HORVU.MOREX.r2.1HG0063340
HORVU.MOREX.r2.1HG0063390
HORVU.MOREX.r2.1HG0063400
HORVU.MOREX.r2.1HG0063660
HORVU.MOREX.r2.1HG0063710
HORVU.MOREX.r2.1HG0063860
HORVU.MOREX.r2.1HG0063900
HORVU.MOREX.r2.1HG0063930
HORVU.MOREX.r2.1HG0063980
HORVU.MOREX.r2.1HG0064090
HORVU.MOREX.r2.1HG0064100
HORVU.MOREX.r2.1HG0064240
HORVU.MOREX.r2.1HG0064290
HORVU.MOREX.r2.1HG0064440
HORVU.MOREX.r2.1HG0064550
HORVU.MOREX.r2.1HG0064610
HORVU.MOREX.r2.1HG0064900
HORVU.MOREX.r2.1HG0064940
HORVU.MOREX.r2.1HG0065010
HORVU.MOREX.r2.1HG0065060
HORVU.MOREX.r2.1HG0065230
HORVU.MOREX.r2.1HG0065250
HORVU.MOREX.r2.1HG0065460
HORVU.MOREX.r2.1HG0065480
HORVU.MOREX.r2.1HG0065490
HORVU.MOREX.r2.1HG0065550
HORVU.MOREX.r2.1HG0065600
HORVU.MOREX.r2.1HG0065710
HORVU.MOREX.r2.1HG0065910
HORVU.MOREX.r2.1HG0066030
HORVU.MOREX.r2.1HG0066050
HORVU.MOREX.r2.1HG0066160
HORVU.MOREX.r2.1HG0066180
HORVU.MOREX.r2.1HG0066190
HORVU.MOREX.r2.1HG0066230
HORVU.MOREX.r2.1HG0066400
HORVU.MOREX.r2.1HG0066410
HORVU.MOREX.r2.1HG0066500
HORVU.MOREX.r2.1HG0066540
HORVU.MOREX.r2.1HG0066720
HORVU.MOREX.r2.1HG0066840
HORVU.MOREX.r2.1HG0066850
HORVU.MOREX.r2.1HG0066870
HORVU.MOREX.r2.1HG0066880
HORVU.MOREX.r2.1HG0066940
HORVU.MOREX.r2.1HG0067220
HORVU.MOREX.r2.1HG0067230
HORVU.MOREX.r2.1HG0067390
HORVU.MOREX.r2.1HG0067440
HORVU.MOREX.r2.1HG0067490
HORVU.MOREX.r2.1HG0067540
HORVU.MOREX.r2.1HG0067800
HORVU.MOREX.r2.1HG0067820
HORVU.MOREX.r2.1HG0067830
HORVU.MOREX.r2.1HG0067840
HORVU.MOREX.r2.1HG0067900
HORVU.MOREX.r2.1HG0068050
HORVU.MOREX.r2.1HG0068210
HORVU.MOREX.r2.1HG0068250
HORVU.MOREX.r2.1HG0068260
HORVU.MOREX.r2.1HG0068420
HORVU.MOREX.r2.1HG0068660
HORVU.MOREX.r2.1HG0068680
HORVU.MOREX.r2.1HG0068960
HORVU.MOREX.r2.1HG0069020
HORVU.MOREX.r2.1HG0069640
HORVU.MOREX.r2.1HG0069670
HORVU.MOREX.r2.1HG0069860
HORVU.MOREX.r2.1HG0069880
HORVU.MOREX.r2.1HG0069900
HORVU.MOREX.r2.1HG0070040
HORVU.MOREX.r2.1HG0070130
HORVU.MOREX.r2.1HG0070170
HORVU.MOREX.r2.1HG0070240
HORVU.MOREX.r2.1HG0070250
HORVU.MOREX.r2.1HG0070310
HORVU.MOREX.r2.1HG0070480
HORVU.MOREX.r2.1HG0070490
HORVU.MOREX.r2.1HG0070680
HORVU.MOREX.r2.1HG0070950
HORVU.MOREX.r2.1HG0071020
HORVU.MOREX.r2.1HG0071270
HORVU.MOREX.r2.1HG0071510
HORVU.MOREX.r2.1HG0071600
HORVU.MOREX.r2.1HG0071620
HORVU.MOREX.r2.1HG0071830
HORVU.MOREX.r2.1HG0072050
HORVU.MOREX.r2.1HG0072140
HORVU.MOREX.r2.1HG0072340
HORVU.MOREX.r2.1HG0072360
HORVU.MOREX.r2.1HG0072390
HORVU.MOREX.r2.1HG0072750
HORVU.MOREX.r2.1HG0072860
HORVU.MOREX.r2.1HG0072870
HORVU.MOREX.r2.1HG0073120
HORVU.MOREX.r2.1HG0073180
HORVU.MOREX.r2.1HG0073210
HORVU.MOREX.r2.1HG0073230
HORVU.MOREX.r2.1HG0073330
HORVU.MOREX.r2.1HG0073350
HORVU.MOREX.r2.1HG0073450
HORVU.MOREX.r2.1HG0073640
HORVU.MOREX.r2.1HG0073720
HORVU.MOREX.r2.1HG0074000
HORVU.MOREX.r2.1HG0074080
HORVU.MOREX.r2.1HG0074100
HORVU.MOREX.r2.1HG0074170
HORVU.MOREX.r2.1HG0074190
HORVU.MOREX.r2.1HG0074230
HORVU.MOREX.r2.1HG0074290
HORVU.MOREX.r2.1HG0074360
HORVU.MOREX.r2.1HG0074410
HORVU.MOREX.r2.1HG0074680
HORVU.MOREX.r2.1HG0075140
HORVU.MOREX.r2.1HG0075150
HORVU.MOREX.r2.1HG0075440
HORVU.MOREX.r2.1HG0075470
HORVU.MOREX.r2.1HG0075480
HORVU.MOREX.r2.1HG0075740
HORVU.MOREX.r2.1HG0075830
HORVU.MOREX.r2.1HG0075860
HORVU.MOREX.r2.1HG0076110
HORVU.MOREX.r2.1HG0076180
HORVU.MOREX.r2.1HG0076220
HORVU.MOREX.r2.1HG0076360
HORVU.MOREX.r2.1HG0076420
HORVU.MOREX.r2.1HG0076430
HORVU.MOREX.r2.1HG0076590
HORVU.MOREX.r2.1HG0076620
HORVU.MOREX.r2.1HG0076630
HORVU.MOREX.r2.1HG0076840
HORVU.MOREX.r2.1HG0076860
HORVU.MOREX.r2.1HG0077240
HORVU.MOREX.r2.1HG0077480
HORVU.MOREX.r2.1HG0077750
HORVU.MOREX.r2.1HG0077760
HORVU.MOREX.r2.1HG0077880
HORVU.MOREX.r2.1HG0077910
HORVU.MOREX.r2.1HG0078020
HORVU.MOREX.r2.1HG0078100
HORVU.MOREX.r2.1HG0078140
HORVU.MOREX.r2.1HG0078180
HORVU.MOREX.r2.1HG0078200
HORVU.MOREX.r2.1HG0078240
HORVU.MOREX.r2.1HG0078370
HORVU.MOREX.r2.1HG0078380
HORVU.MOREX.r2.1HG0078400
HORVU.MOREX.r2.1HG0078410
HORVU.MOREX.r2.1HG0078440
HORVU.MOREX.r2.1HG0078510
HORVU.MOREX.r2.1HG0078650
HORVU.MOREX.r2.1HG0000050
HORVU.MOREX.r2.1HG0000060
HORVU.MOREX.r2.1HG0000070
HORVU.MOREX.r2.1HG0000110
HORVU.MOREX.r2.1HG0000440
HORVU.MOREX.r2.1HG0000450
HORVU.MOREX.r2.1HG0000470
HORVU.MOREX.r2.1HG0000670
HORVU.MOREX.r2.1HG0000700
HORVU.MOREX.r2.1HG0000730
HORVU.MOREX.r2.1HG0001030
HORVU.MOREX.r2.1HG0001530
HORVU.MOREX.r2.1HG0001550
HORVU.MOREX.r2.1HG0001580
HORVU.MOREX.r2.1HG0001590
HORVU.MOREX.r2.1HG0001610
HORVU.MOREX.r2.1HG0001980
HORVU.MOREX.r2.1HG0002170
HORVU.MOREX.r2.1HG0002200
HORVU.MOREX.r2.1HG0002310
HORVU.MOREX.r2.1HG0002320
HORVU.MOREX.r2.1HG0002330
HORVU.MOREX.r2.1HG0002860
HORVU.MOREX.r2.1HG0003050
HORVU.MOREX.r2.1HG0003080
HORVU.MOREX.r2.1HG0003170
HORVU.MOREX.r2.1HG0003210
HORVU.MOREX.r2.1HG0003760
HORVU.MOREX.r2.1HG0003870
HORVU.MOREX.r2.1HG0003940
HORVU.MOREX.r2.1HG0004070
HORVU.MOREX.r2.1HG0004080
HORVU.MOREX.r2.1HG0004130
HORVU.MOREX.r2.1HG0004270
HORVU.MOREX.r2.1HG0004360
HORVU.MOREX.r2.1HG0004410
HORVU.MOREX.r2.1HG0004680
HORVU.MOREX.r2.1HG0004740
HORVU.MOREX.r2.1HG0004760
HORVU.MOREX.r2.1HG0004820
HORVU.MOREX.r2.1HG0004840
HORVU.MOREX.r2.1HG0004850
HORVU.MOREX.r2.1HG0005540
HORVU.MOREX.r2.1HG0005640
HORVU.MOREX.r2.1HG0005800
HORVU.MOREX.r2.1HG0005810
HORVU.MOREX.r2.1HG0005860
HORVU.MOREX.r2.1HG0005880
HORVU.MOREX.r2.1HG0006010
HORVU.MOREX.r2.1HG0006200
HORVU.MOREX.r2.1HG0006370
HORVU.MOREX.r2.1HG0006390
HORVU.MOREX.r2.1HG0006400
HORVU.MOREX.r2.1HG0006540
HORVU.MOREX.r2.1HG0006710
HORVU.MOREX.r2.1HG0006720
HORVU.MOREX.r2.1HG0007010
HORVU.MOREX.r2.1HG0007340
HORVU.MOREX.r2.1HG0007670
HORVU.MOREX.r2.1HG0008110
HORVU.MOREX.r2.1HG0008270
HORVU.MOREX.r2.1HG0008320
HORVU.MOREX.r2.1HG0008340
HORVU.MOREX.r2.1HG0008370
HORVU.MOREX.r2.1HG0008420
HORVU.MOREX.r2.1HG0008940
HORVU.MOREX.r2.1HG0009100
HORVU.MOREX.r2.1HG0009140
HORVU.MOREX.r2.1HG0009190
HORVU.MOREX.r2.1HG0009250
HORVU.MOREX.r2.1HG0009310
HORVU.MOREX.r2.1HG0009340
HORVU.MOREX.r2.1HG0009630
HORVU.MOREX.r2.1HG0009920
HORVU.MOREX.r2.1HG0009930
HORVU.MOREX.r2.1HG0009970
HORVU.MOREX.r2.1HG0010090
HORVU.MOREX.r2.1HG0010610
HORVU.MOREX.r2.1HG0010640
HORVU.MOREX.r2.1HG0010650
HORVU.MOREX.r2.1HG0010840
HORVU.MOREX.r2.1HG0010950
HORVU.MOREX.r2.1HG0011120
HORVU.MOREX.r2.1HG0011170
HORVU.MOREX.r2.1HG0011270
HORVU.MOREX.r2.1HG0011280
HORVU.MOREX.r2.1HG0011320
HORVU.MOREX.r2.1HG0011460
HORVU.MOREX.r2.1HG0011610
HORVU.MOREX.r2.1HG0011850
HORVU.MOREX.r2.1HG0011860
HORVU.MOREX.r2.1HG0011910
HORVU.MOREX.r2.1HG0011920
HORVU.MOREX.r2.1HG0012390
HORVU.MOREX.r2.1HG0012470
HORVU.MOREX.r2.1HG0012580
HORVU.MOREX.r2.1HG0012660
HORVU.MOREX.r2.1HG0012710
HORVU.MOREX.r2.1HG0012730
HORVU.MOREX.r2.1HG0012760
HORVU.MOREX.r2.1HG0012860
HORVU.MOREX.r2.1HG0012890
HORVU.MOREX.r2.1HG0012910
HORVU.MOREX.r2.1HG0012950
HORVU.MOREX.r2.1HG0013090
HORVU.MOREX.r2.1HG0013100
HORVU.MOREX.r2.1HG0013170
HORVU.MOREX.r2.1HG0013190
HORVU.MOREX.r2.1HG0013320
HORVU.MOREX.r2.1HG0013500
HORVU.MOREX.r2.1HG0013750
HORVU.MOREX.r2.1HG0013790
HORVU.MOREX.r2.1HG0013890
HORVU.MOREX.r2.1HG0013960
HORVU.MOREX.r2.1HG0013980
HORVU.MOREX.r2.1HG0014050
HORVU.MOREX.r2.1HG0014140
HORVU.MOREX.r2.1HG0014200
HORVU.MOREX.r2.1HG0014210
HORVU.MOREX.r2.1HG0014560
HORVU.MOREX.r2.1HG0014570
HORVU.MOREX.r2.1HG0014740
HORVU.MOREX.r2.1HG0014750
HORVU.MOREX.r2.1HG0014840
HORVU.MOREX.r2.1HG0014990
HORVU.MOREX.r2.1HG0015080
HORVU.MOREX.r2.1HG0015140
HORVU.MOREX.r2.1HG0015280
HORVU.MOREX.r2.1HG0015410
HORVU.MOREX.r2.1HG0015630
HORVU.MOREX.r2.1HG0015640
HORVU.MOREX.r2.1HG0015690
HORVU.MOREX.r2.1HG0015940
HORVU.MOREX.r2.1HG0015970
HORVU.MOREX.r2.1HG0016090
HORVU.MOREX.r2.1HG0016100
HORVU.MOREX.r2.1HG0016190
HORVU.MOREX.r2.1HG0016250
HORVU.MOREX.r2.1HG0016430
HORVU.MOREX.r2.1HG0016540
HORVU.MOREX.r2.1HG0016720
HORVU.MOREX.r2.1HG0017160
HORVU.MOREX.r2.1HG0017270
HORVU.MOREX.r2.1HG0017350
HORVU.MOREX.r2.1HG0017360
HORVU.MOREX.r2.1HG0017380
HORVU.MOREX.r2.1HG0017460
HORVU.MOREX.r2.1HG0017470
HORVU.MOREX.r2.1HG0017700
HORVU.MOREX.r2.1HG0017770
HORVU.MOREX.r2.1HG0017800
HORVU.MOREX.r2.1HG0017820
HORVU.MOREX.r2.1HG0017850
HORVU.MOREX.r2.1HG0018100
HORVU.MOREX.r2.1HG0018140
HORVU.MOREX.r2.1HG0018190
HORVU.MOREX.r2.1HG0018200
HORVU.MOREX.r2.1HG0018520
HORVU.MOREX.r2.1HG0018790
HORVU.MOREX.r2.1HG0018930
HORVU.MOREX.r2.1HG0019020
HORVU.MOREX.r2.1HG0019040
HORVU.MOREX.r2.1HG0019050
HORVU.MOREX.r2.1HG0019110
HORVU.MOREX.r2.1HG0019300
HORVU.MOREX.r2.1HG0019520
HORVU.MOREX.r2.1HG0019550
HORVU.MOREX.r2.1HG0019710
HORVU.MOREX.r2.1HG0019760
HORVU.MOREX.r2.1HG0019860
HORVU.MOREX.r2.1HG0020240
HORVU.MOREX.r2.1HG0020380
HORVU.MOREX.r2.1HG0020460
HORVU.MOREX.r2.1HG0020600
HORVU.MOREX.r2.1HG0020650
HORVU.MOREX.r2.1HG0020950
HORVU.MOREX.r2.1HG0021200
HORVU.MOREX.r2.1HG0021230
HORVU.MOREX.r2.1HG0021290
HORVU.MOREX.r2.1HG0021480
HORVU.MOREX.r2.1HG0021830
HORVU.MOREX.r2.1HG0022130
HORVU.MOREX.r2.1HG0022140
HORVU.MOREX.r2.1HG0022240
HORVU.MOREX.r2.1HG0022270
HORVU.MOREX.r2.1HG0023100
HORVU.MOREX.r2.1HG0023110
HORVU.MOREX.r2.1HG0023160
HORVU.MOREX.r2.1HG0023190
HORVU.MOREX.r2.1HG0023220
HORVU.MOREX.r2.1HG0023250
HORVU.MOREX.r2.1HG0023270
HORVU.MOREX.r2.1HG0023360
HORVU.MOREX.r2.1HG0023430
HORVU.MOREX.r2.1HG0023690
HORVU.MOREX.r2.1HG0023760
HORVU.MOREX.r2.1HG0023970
HORVU.MOREX.r2.1HG0024040
HORVU.MOREX.r2.1HG0024700
HORVU.MOREX.r2.1HG0024740
HORVU.MOREX.r2.1HG0025040
HORVU.MOREX.r2.1HG0025130
HORVU.MOREX.r2.1HG0025170
HORVU.MOREX.r2.1HG0025270
HORVU.MOREX.r2.1HG0025520
HORVU.MOREX.r2.1HG0025600
HORVU.MOREX.r2.1HG0025750
HORVU.MOREX.r2.1HG0025800
HORVU.MOREX.r2.1HG0025950
HORVU.MOREX.r2.1HG0026080
HORVU.MOREX.r2.1HG0026100
HORVU.MOREX.r2.1HG0026120
HORVU.MOREX.r2.1HG0026160
HORVU.MOREX.r2.1HG0026350
HORVU.MOREX.r2.1HG0026400
HORVU.MOREX.r2.1HG0026610
HORVU.MOREX.r2.1HG0026810
HORVU.MOREX.r2.1HG0027000
HORVU.MOREX.r2.1HG0027100
HORVU.MOREX.r2.1HG0027110
HORVU.MOREX.r2.1HG0027140
HORVU.MOREX.r2.1HG0027180
HORVU.MOREX.r2.1HG0027200
HORVU.MOREX.r2.1HG0027350
HORVU.MOREX.r2.1HG0027460
HORVU.MOREX.r2.1HG0027550
HORVU.MOREX.r2.1HG0027560
HORVU.MOREX.r2.1HG0027620
HORVU.MOREX.r2.1HG0028180
HORVU.MOREX.r2.1HG0028190
HORVU.MOREX.r2.1HG0028260
HORVU.MOREX.r2.1HG0028620
HORVU.MOREX.r2.1HG0028700
HORVU.MOREX.r2.1HG0028780
HORVU.MOREX.r2.1HG0028810
HORVU.MOREX.r2.1HG0028950
HORVU.MOREX.r2.1HG0029010
HORVU.MOREX.r2.1HG0029020
HORVU.MOREX.r2.1HG0029220
HORVU.MOREX.r2.1HG0029250
HORVU.MOREX.r2.1HG0029530
HORVU.MOREX.r2.1HG0029580
HORVU.MOREX.r2.1HG0029630
HORVU.MOREX.r2.1HG0029930
HORVU.MOREX.r2.1HG0029980
HORVU.MOREX.r2.1HG0030110
HORVU.MOREX.r2.1HG0030330
HORVU.MOREX.r2.1HG0030340
HORVU.MOREX.r2.1HG0030770
HORVU.MOREX.r2.1HG0030810
HORVU.MOREX.r2.1HG0030890
HORVU.MOREX.r2.1HG0030950
HORVU.MOREX.r2.1HG0031440
HORVU.MOREX.r2.1HG0031680
HORVU.MOREX.r2.1HG0031720
HORVU.MOREX.r2.1HG0031750
HORVU.MOREX.r2.1HG0031870
HORVU.MOREX.r2.1HG0032020
HORVU.MOREX.r2.1HG0032360
HORVU.MOREX.r2.1HG0032530
HORVU.MOREX.r2.1HG0032560
HORVU.MOREX.r2.1HG0032840
HORVU.MOREX.r2.1HG0032960
HORVU.MOREX.r2.1HG0033000
HORVU.MOREX.r2.1HG0033180
HORVU.MOREX.r2.1HG0033320
HORVU.MOREX.r2.1HG0033960
HORVU.MOREX.r2.1HG0034090
HORVU.MOREX.r2.1HG0034100
HORVU.MOREX.r2.1HG0034210
HORVU.MOREX.r2.1HG0034330
HORVU.MOREX.r2.1HG0034380
HORVU.MOREX.r2.1HG0034390
HORVU.MOREX.r2.1HG0034430
HORVU.MOREX.r2.1HG0034490
HORVU.MOREX.r2.1HG0034520
HORVU.MOREX.r2.1HG0034570
HORVU.MOREX.r2.1HG0034640
HORVU.MOREX.r2.1HG0034670
HORVU.MOREX.r2.1HG0034680
HORVU.MOREX.r2.1HG0034770
HORVU.MOREX.r2.1HG0034940
HORVU.MOREX.r2.1HG0035320
HORVU.MOREX.r2.1HG0035660
HORVU.MOREX.r2.1HG0035730
HORVU.MOREX.r2.1HG0035740
HORVU.MOREX.r2.1HG0035810
HORVU.MOREX.r2.1HG0035910
HORVU.MOREX.r2.1HG0036010
HORVU.MOREX.r2.1HG0036430
HORVU.MOREX.r2.1HG0036490
HORVU.MOREX.r2.1HG0036560
HORVU.MOREX.r2.1HG0036690
HORVU.MOREX.r2.1HG0037030
HORVU.MOREX.r2.1HG0037080
HORVU.MOREX.r2.1HG0037140
HORVU.MOREX.r2.1HG0037230
HORVU.MOREX.r2.1HG0037340
HORVU.MOREX.r2.1HG0037400
HORVU.MOREX.r2.1HG0037430
HORVU.MOREX.r2.1HG0037450
HORVU.MOREX.r2.1HG0037470
HORVU.MOREX.r2.1HG0037780
HORVU.MOREX.r2.1HG0037930
HORVU.MOREX.r2.1HG0038330
HORVU.MOREX.r2.1HG0038350
HORVU.MOREX.r2.1HG0038370
HORVU.MOREX.r2.1HG0038510
HORVU.MOREX.r2.1HG0038610
HORVU.MOREX.r2.1HG0038670
HORVU.MOREX.r2.1HG0038680
HORVU.MOREX.r2.1HG0038860
HORVU.MOREX.r2.1HG0038870
HORVU.MOREX.r2.1HG0039160
HORVU.MOREX.r2.1HG0039180
HORVU.MOREX.r2.1HG0039270
HORVU.MOREX.r2.1HG0039530
HORVU.MOREX.r2.1HG0039590
HORVU.MOREX.r2.1HG0039610
HORVU.MOREX.r2.1HG0039630
HORVU.MOREX.r2.1HG0039700
HORVU.MOREX.r2.1HG0039750
HORVU.MOREX.r2.1HG0039760
HORVU.MOREX.r2.1HG0039770
HORVU.MOREX.r2.1HG0039940
HORVU.MOREX.r2.1HG0039980
HORVU.MOREX.r2.1HG0040340
HORVU.MOREX.r2.1HG0040430
HORVU.MOREX.r2.1HG0040630
HORVU.MOREX.r2.1HG0040780
HORVU.MOREX.r2.1HG0040820
HORVU.MOREX.r2.1HG0040920
HORVU.MOREX.r2.1HG0041020
HORVU.MOREX.r2.1HG0041140
HORVU.MOREX.r2.1HG0041220
HORVU.MOREX.r2.1HG0041250
HORVU.MOREX.r2.1HG0041320
HORVU.MOREX.r2.1HG0041330
HORVU.MOREX.r2.1HG0041390
HORVU.MOREX.r2.1HG0041400
HORVU.MOREX.r2.1HG0041430
HORVU.MOREX.r2.1HG0041530
HORVU.MOREX.r2.1HG0041570
HORVU.MOREX.r2.1HG0041630
HORVU.MOREX.r2.1HG0041690
HORVU.MOREX.r2.1HG0041750
HORVU.MOREX.r2.1HG0041800
HORVU.MOREX.r2.1HG0041840
HORVU.MOREX.r2.1HG0041900
HORVU.MOREX.r2.1HG0041950
HORVU.MOREX.r2.1HG0041980
HORVU.MOREX.r2.1HG0042030
HORVU.MOREX.r2.1HG0042060
HORVU.MOREX.r2.1HG0042210
HORVU.MOREX.r2.1HG0042260
HORVU.MOREX.r2.1HG0042270
HORVU.MOREX.r2.1HG0042350
HORVU.MOREX.r2.1HG0042370
HORVU.MOREX.r2.1HG0042450
HORVU.MOREX.r2.1HG0042520
HORVU.MOREX.r2.1HG0042650
HORVU.MOREX.r2.1HG0042860
HORVU.MOREX.r2.1HG0043160
HORVU.MOREX.r2.1HG0043540
HORVU.MOREX.r2.1HG0043610
HORVU.MOREX.r2.1HG0043630
HORVU.MOREX.r2.1HG0043760
HORVU.MOREX.r2.1HG0043840
HORVU.MOREX.r2.1HG0043860
HORVU.MOREX.r2.1HG0044130
HORVU.MOREX.r2.1HG0044380
HORVU.MOREX.r2.1HG0044410
HORVU.MOREX.r2.1HG0044550
HORVU.MOREX.r2.1HG0044700
HORVU.MOREX.r2.1HG0044740
HORVU.MOREX.r2.1HG0044760
HORVU.MOREX.r2.1HG0044790
HORVU.MOREX.r2.1HG0044810
HORVU.MOREX.r2.1HG0044870
HORVU.MOREX.r2.1HG0044880
HORVU.MOREX.r2.1HG0044890
HORVU.MOREX.r2.1HG0044960
HORVU.MOREX.r2.1HG0045020
HORVU.MOREX.r2.1HG0045400
HORVU.MOREX.r2.1HG0045430
HORVU.MOREX.r2.1HG0045490
HORVU.MOREX.r2.1HG0045510
HORVU.MOREX.r2.1HG0045580
HORVU.MOREX.r2.1HG0045700
HORVU.MOREX.r2.1HG0045900
HORVU.MOREX.r2.1HG0046110
HORVU.MOREX.r2.1HG0046120
HORVU.MOREX.r2.1HG0046130
HORVU.MOREX.r2.1HG0046200
HORVU.MOREX.r2.1HG0046280
HORVU.MOREX.r2.1HG0046310
HORVU.MOREX.r2.1HG0046450
HORVU.MOREX.r2.1HG0046590
HORVU.MOREX.r2.1HG0046650
HORVU.MOREX.r2.1HG0046680
HORVU.MOREX.r2.1HG0046940
HORVU.MOREX.r2.1HG0046960
HORVU.MOREX.r2.1HG0046970
HORVU.MOREX.r2.1HG0047080
HORVU.MOREX.r2.1HG0047280
HORVU.MOREX.r2.1HG0047450
HORVU.MOREX.r2.1HG0047510
HORVU.MOREX.r2.1HG0047530
HORVU.MOREX.r2.1HG0047600
HORVU.MOREX.r2.1HG0047730
HORVU.MOREX.r2.1HG0047840
HORVU.MOREX.r2.1HG0047850
HORVU.MOREX.r2.1HG0048000
HORVU.MOREX.r2.1HG0048180
HORVU.MOREX.r2.1HG0048640
HORVU.MOREX.r2.1HG0048660
HORVU.MOREX.r2.1HG0048720
HORVU.MOREX.r2.1HG0048790
HORVU.MOREX.r2.1HG0048820
HORVU.MOREX.r2.1HG0048880
HORVU.MOREX.r2.1HG0048950
HORVU.MOREX.r2.1HG0048990
HORVU.MOREX.r2.1HG0049160
HORVU.MOREX.r2.1HG0049300
HORVU.MOREX.r2.1HG0049330
HORVU.MOREX.r2.1HG0049420
HORVU.MOREX.r2.1HG0049550
HORVU.MOREX.r2.1HG0049580
HORVU.MOREX.r2.1HG0049700
HORVU.MOREX.r2.1HG0049760
HORVU.MOREX.r2.1HG0049800
HORVU.MOREX.r2.1HG0049830
HORVU.MOREX.r2.1HG0049920
HORVU.MOREX.r2.1HG0049930
HORVU.MOREX.r2.1HG0050050
HORVU.MOREX.r2.1HG0050160
HORVU.MOREX.r2.1HG0050400
HORVU.MOREX.r2.1HG0050540
HORVU.MOREX.r2.1HG0050560
HORVU.MOREX.r2.1HG0050740
HORVU.MOREX.r2.1HG0050820
HORVU.MOREX.r2.1HG0050850
HORVU.MOREX.r2.1HG0050860
HORVU.MOREX.r2.1HG0051050
HORVU.MOREX.r2.1HG0051240
HORVU.MOREX.r2.1HG0051300
HORVU.MOREX.r2.1HG0051370
HORVU.MOREX.r2.1HG0051390
HORVU.MOREX.r2.1HG0051400
HORVU.MOREX.r2.1HG0051580
HORVU.MOREX.r2.1HG0051730
HORVU.MOREX.r2.1HG0051850
HORVU.MOREX.r2.1HG0051910
HORVU.MOREX.r2.1HG0051990
HORVU.MOREX.r2.1HG0052000
HORVU.MOREX.r2.1HG0052010
HORVU.MOREX.r2.1HG0052160
HORVU.MOREX.r2.1HG0052390
HORVU.MOREX.r2.1HG0052620
HORVU.MOREX.r2.1HG0052630
HORVU.MOREX.r2.1HG0052730
HORVU.MOREX.r2.1HG0052740
HORVU.MOREX.r2.1HG0052890
HORVU.MOREX.r2.1HG0053120
HORVU.MOREX.r2.1HG0053250
HORVU.MOREX.r2.1HG0053540
HORVU.MOREX.r2.1HG0053580
HORVU.MOREX.r2.1HG0053750
HORVU.MOREX.r2.1HG0053900
HORVU.MOREX.r2.1HG0053940
HORVU.MOREX.r2.1HG0054270
HORVU.MOREX.r2.1HG0054280
HORVU.MOREX.r2.1HG0054590
HORVU.MOREX.r2.1HG0054640
HORVU.MOREX.r2.1HG0054680
HORVU.MOREX.r2.1HG0054840
HORVU.MOREX.r2.1HG0055180
HORVU.MOREX.r2.1HG0055320
HORVU.MOREX.r2.1HG0055390
HORVU.MOREX.r2.1HG0055400
HORVU.MOREX.r2.1HG0055470
HORVU.MOREX.r2.1HG0055530
HORVU.MOREX.r2.1HG0055630
HORVU.MOREX.r2.1HG0055660
HORVU.MOREX.r2.1HG0055710
HORVU.MOREX.r2.1HG0055730
HORVU.MOREX.r2.1HG0055790
HORVU.MOREX.r2.1HG0055950
HORVU.MOREX.r2.1HG0055960
HORVU.MOREX.r2.1HG0056190
HORVU.MOREX.r2.1HG0056220
HORVU.MOREX.r2.1HG0056230
HORVU.MOREX.r2.1HG0056280
HORVU.MOREX.r2.1HG0056310
HORVU.MOREX.r2.1HG0056360
HORVU.MOREX.r2.1HG0056370
HORVU.MOREX.r2.1HG0056380
HORVU.MOREX.r2.1HG0056460
HORVU.MOREX.r2.1HG0056760
HORVU.MOREX.r2.1HG0056940
HORVU.MOREX.r2.1HG0056970
HORVU.MOREX.r2.1HG0057210
HORVU.MOREX.r2.1HG0057610
HORVU.MOREX.r2.1HG0057640
HORVU.MOREX.r2.1HG0057650
HORVU.MOREX.r2.1HG0057780
HORVU.MOREX.r2.1HG0057800
HORVU.MOREX.r2.1HG0058210
HORVU.MOREX.r2.1HG0058340
HORVU.MOREX.r2.1HG0058380
HORVU.MOREX.r2.1HG0058390
HORVU.MOREX.r2.1HG0058460
HORVU.MOREX.r2.1HG0058760
HORVU.MOREX.r2.1HG0058820
HORVU.MOREX.r2.1HG0058830
HORVU.MOREX.r2.1HG0058840
HORVU.MOREX.r2.1HG0058910
HORVU.MOREX.r2.1HG0058920
HORVU.MOREX.r2.1HG0059040
HORVU.MOREX.r2.1HG0059100
HORVU.MOREX.r2.1HG0059590
HORVU.MOREX.r2.1HG0059680
HORVU.MOREX.r2.1HG0059730
HORVU.MOREX.r2.1HG0059760
HORVU.MOREX.r2.1HG0059780
HORVU.MOREX.r2.1HG0059850
HORVU.MOREX.r2.1HG0059910
HORVU.MOREX.r2.1HG0059950
HORVU.MOREX.r2.1HG0059970
HORVU.MOREX.r2.1HG0059980
HORVU.MOREX.r2.1HG0059990
HORVU.MOREX.r2.1HG0060000
HORVU.MOREX.r2.1HG0060120
HORVU.MOREX.r2.1HG0060250
HORVU.MOREX.r2.1HG0060280
HORVU.MOREX.r2.1HG0060290
HORVU.MOREX.r2.1HG0060380
HORVU.MOREX.r2.1HG0060770
HORVU.MOREX.r2.1HG0060970
HORVU.MOREX.r2.1HG0061000
HORVU.MOREX.r2.1HG0061060
HORVU.MOREX.r2.1HG0061100
HORVU.MOREX.r2.1HG0061110
HORVU.MOREX.r2.1HG0061200
HORVU.MOREX.r2.1HG0061230
HORVU.MOREX.r2.1HG0061240
HORVU.MOREX.r2.1HG0061420
HORVU.MOREX.r2.1HG0061480
HORVU.MOREX.r2.1HG0061510
HORVU.MOREX.r2.1HG0062040
HORVU.MOREX.r2.1HG0062050
HORVU.MOREX.r2.1HG0062060
HORVU.MOREX.r2.1HG0062100
HORVU.MOREX.r2.1HG0062140
HORVU.MOREX.r2.1HG0062150
HORVU.MOREX.r2.1HG0062240
HORVU.MOREX.r2.1HG0062430
HORVU.MOREX.r2.1HG0062540
HORVU.MOREX.r2.1HG0062770
HORVU.MOREX.r2.1HG0062850
HORVU.MOREX.r2.1HG0063050
HORVU.MOREX.r2.1HG0063060
HORVU.MOREX.r2.1HG0063090
HORVU.MOREX.r2.1HG0063120
HORVU.MOREX.r2.1HG0063130
HORVU.MOREX.r2.1HG0063230
HORVU.MOREX.r2.1HG0063320
HORVU.MOREX.r2.1HG0063490
HORVU.MOREX.r2.1HG0063550
HORVU.MOREX.r2.1HG0063810
HORVU.MOREX.r2.1HG0063830
HORVU.MOREX.r2.1HG0063960
HORVU.MOREX.r2.1HG0064120
HORVU.MOREX.r2.1HG0064170
HORVU.MOREX.r2.1HG0064380
HORVU.MOREX.r2.1HG0064390
HORVU.MOREX.r2.1HG0064410
HORVU.MOREX.r2.1HG0064450
HORVU.MOREX.r2.1HG0064540
HORVU.MOREX.r2.1HG0064580
HORVU.MOREX.r2.1HG0064910
HORVU.MOREX.r2.1HG0064930
HORVU.MOREX.r2.1HG0065020
HORVU.MOREX.r2.1HG0065070
HORVU.MOREX.r2.1HG0065170
HORVU.MOREX.r2.1HG0065190
HORVU.MOREX.r2.1HG0065470
HORVU.MOREX.r2.1HG0065510
HORVU.MOREX.r2.1HG0065590
HORVU.MOREX.r2.1HG0065700
HORVU.MOREX.r2.1HG0065860
HORVU.MOREX.r2.1HG0065900
HORVU.MOREX.r2.1HG0065920
HORVU.MOREX.r2.1HG0066040
HORVU.MOREX.r2.1HG0066090
HORVU.MOREX.r2.1HG0066370
HORVU.MOREX.r2.1HG0066380
HORVU.MOREX.r2.1HG0066390
HORVU.MOREX.r2.1HG0066440
HORVU.MOREX.r2.1HG0066670
HORVU.MOREX.r2.1HG0066820
HORVU.MOREX.r2.1HG0066830
HORVU.MOREX.r2.1HG0066860
HORVU.MOREX.r2.1HG0066980
HORVU.MOREX.r2.1HG0067040
HORVU.MOREX.r2.1HG0067180
HORVU.MOREX.r2.1HG0067380
HORVU.MOREX.r2.1HG0067500
HORVU.MOREX.r2.1HG0067510
HORVU.MOREX.r2.1HG0067660
HORVU.MOREX.r2.1HG0067760
HORVU.MOREX.r2.1HG0067770
HORVU.MOREX.r2.1HG0067910
HORVU.MOREX.r2.1HG0067960
HORVU.MOREX.r2.1HG0068370
HORVU.MOREX.r2.1HG0068540
HORVU.MOREX.r2.1HG0068730
HORVU.MOREX.r2.1HG0068890
HORVU.MOREX.r2.1HG0068940
HORVU.MOREX.r2.1HG0069010
HORVU.MOREX.r2.1HG0069410
HORVU.MOREX.r2.1HG0069480
HORVU.MOREX.r2.1HG0069590
HORVU.MOREX.r2.1HG0069820
HORVU.MOREX.r2.1HG0069830
HORVU.MOREX.r2.1HG0070060
HORVU.MOREX.r2.1HG0070120
HORVU.MOREX.r2.1HG0070320
HORVU.MOREX.r2.1HG0070570
HORVU.MOREX.r2.1HG0070690
HORVU.MOREX.r2.1HG0070900
HORVU.MOREX.r2.1HG0071130
HORVU.MOREX.r2.1HG0071140
HORVU.MOREX.r2.1HG0071160
HORVU.MOREX.r2.1HG0071210
HORVU.MOREX.r2.1HG0071810
HORVU.MOREX.r2.1HG0071820
HORVU.MOREX.r2.1HG0072040
HORVU.MOREX.r2.1HG0072150
HORVU.MOREX.r2.1HG0072260
HORVU.MOREX.r2.1HG0072300
HORVU.MOREX.r2.1HG0072350
HORVU.MOREX.r2.1HG0072490
HORVU.MOREX.r2.1HG0072940
HORVU.MOREX.r2.1HG0072950
HORVU.MOREX.r2.1HG0073100
HORVU.MOREX.r2.1HG0073300
HORVU.MOREX.r2.1HG0073390
HORVU.MOREX.r2.1HG0073420
HORVU.MOREX.r2.1HG0073430
HORVU.MOREX.r2.1HG0073630
HORVU.MOREX.r2.1HG0073710
HORVU.MOREX.r2.1HG0073990
HORVU.MOREX.r2.1HG0074020
HORVU.MOREX.r2.1HG0074260
HORVU.MOREX.r2.1HG0074340
HORVU.MOREX.r2.1HG0074420
HORVU.MOREX.r2.1HG0074470
HORVU.MOREX.r2.1HG0074530
HORVU.MOREX.r2.1HG0074540
HORVU.MOREX.r2.1HG0074590
HORVU.MOREX.r2.1HG0074660
HORVU.MOREX.r2.1HG0074710
HORVU.MOREX.r2.1HG0074850
HORVU.MOREX.r2.1HG0074870
HORVU.MOREX.r2.1HG0074920
HORVU.MOREX.r2.1HG0075070
HORVU.MOREX.r2.1HG0075130
HORVU.MOREX.r2.1HG0075200
HORVU.MOREX.r2.1HG0075260
HORVU.MOREX.r2.1HG0075630
HORVU.MOREX.r2.1HG0075760
HORVU.MOREX.r2.1HG0075780
HORVU.MOREX.r2.1HG0075820
HORVU.MOREX.r2.1HG0075910
HORVU.MOREX.r2.1HG0076300
HORVU.MOREX.r2.1HG0076570
HORVU.MOREX.r2.1HG0076670
HORVU.MOREX.r2.1HG0076680
HORVU.MOREX.r2.1HG0076960
HORVU.MOREX.r2.1HG0076970
HORVU.MOREX.r2.1HG0077020
HORVU.MOREX.r2.1HG0077060
HORVU.MOREX.r2.1HG0077090
HORVU.MOREX.r2.1HG0077180
HORVU.MOREX.r2.1HG0077230
HORVU.MOREX.r2.1HG0077250
HORVU.MOREX.r2.1HG0077280
HORVU.MOREX.r2.1HG0077340
HORVU.MOREX.r2.1HG0077400
HORVU.MOREX.r2.1HG0077430
HORVU.MOREX.r2.1HG0077500
HORVU.MOREX.r2.1HG0077550
HORVU.MOREX.r2.1HG0077560
HORVU.MOREX.r2.1HG0077870
HORVU.MOREX.r2.1HG0078080
HORVU.MOREX.r2.1HG0078090
HORVU.MOREX.r2.1HG0078230
HORVU.MOREX.r2.1HG0078290
HORVU.MOREX.r2.1HG0078310
HORVU.MOREX.r2.1HG0078320
HORVU.MOREX.r2.1HG0078340
HORVU.MOREX.r2.1HG0078350
HORVU.MOREX.r2.1HG0078390
HORVU.MOREX.r2.1HG0078430
HORVU.MOREX.r2.1HG0078550
HORVU.MOREX.r2.1HG0078560
HORVU.MOREX.r2.1HG0078570
HORVU.MOREX.r2.1HG0078610
HORVU.MOREX.r2.1HG0078630
HORVU.MOREX.r2.1HG0078740
HORVU.MOREX.r2.1HG0078760
HORVU.MOREX.r2.2HG0078890
HORVU.MOREX.r2.2HG0078940
HORVU.MOREX.r2.2HG0079060
HORVU.MOREX.r2.2HG0079180
HORVU.MOREX.r2.2HG0079230
HORVU.MOREX.r2.2HG0079410
HORVU.MOREX.r2.2HG0079560
HORVU.MOREX.r2.2HG0079630
HORVU.MOREX.r2.2HG0079710
HORVU.MOREX.r2.2HG0079740
HORVU.MOREX.r2.2HG0079750
HORVU.MOREX.r2.2HG0079820
HORVU.MOREX.r2.2HG0080040
HORVU.MOREX.r2.2HG0080150
HORVU.MOREX.r2.2HG0080180
HORVU.MOREX.r2.2HG0080730
HORVU.MOREX.r2.2HG0080870
HORVU.MOREX.r2.2HG0081060
HORVU.MOREX.r2.2HG0081260
HORVU.MOREX.r2.2HG0081500
HORVU.MOREX.r2.2HG0081520
HORVU.MOREX.r2.2HG0081760
HORVU.MOREX.r2.2HG0081770
HORVU.MOREX.r2.2HG0081780
HORVU.MOREX.r2.2HG0082200
HORVU.MOREX.r2.2HG0082320
HORVU.MOREX.r2.2HG0082370
HORVU.MOREX.r2.2HG0082400
HORVU.MOREX.r2.2HG0082620
HORVU.MOREX.r2.2HG0082790
HORVU.MOREX.r2.2HG0083030
HORVU.MOREX.r2.2HG0083110
HORVU.MOREX.r2.2HG0083180
HORVU.MOREX.r2.2HG0083320
HORVU.MOREX.r2.2HG0083460
HORVU.MOREX.r2.2HG0083470
HORVU.MOREX.r2.2HG0083490
HORVU.MOREX.r2.2HG0083500
HORVU.MOREX.r2.2HG0083630
HORVU.MOREX.r2.2HG0084620
HORVU.MOREX.r2.2HG0085190
HORVU.MOREX.r2.2HG0085540
HORVU.MOREX.r2.2HG0085750
HORVU.MOREX.r2.2HG0085830
HORVU.MOREX.r2.2HG0085840
HORVU.MOREX.r2.2HG0085880
HORVU.MOREX.r2.2HG0085890
HORVU.MOREX.r2.2HG0085900
HORVU.MOREX.r2.2HG0085910
HORVU.MOREX.r2.2HG0085920
HORVU.MOREX.r2.2HG0085990
HORVU.MOREX.r2.2HG0086160
HORVU.MOREX.r2.2HG0086410
HORVU.MOREX.r2.2HG0086560
HORVU.MOREX.r2.2HG0086730
HORVU.MOREX.r2.2HG0087210
HORVU.MOREX.r2.2HG0087370
HORVU.MOREX.r2.2HG0088000
HORVU.MOREX.r2.2HG0088030
HORVU.MOREX.r2.2HG0088180
HORVU.MOREX.r2.2HG0088320
HORVU.MOREX.r2.2HG0088330
HORVU.MOREX.r2.2HG0088440
HORVU.MOREX.r2.2HG0088480
HORVU.MOREX.r2.2HG0088660
HORVU.MOREX.r2.2HG0088840
HORVU.MOREX.r2.2HG0089200
HORVU.MOREX.r2.2HG0089210
HORVU.MOREX.r2.2HG0089240
HORVU.MOREX.r2.2HG0089330
HORVU.MOREX.r2.2HG0089510
HORVU.MOREX.r2.2HG0089520
HORVU.MOREX.r2.2HG0089530
HORVU.MOREX.r2.2HG0089710
HORVU.MOREX.r2.2HG0089740
HORVU.MOREX.r2.2HG0090020
HORVU.MOREX.r2.2HG0090260
HORVU.MOREX.r2.2HG0090280
HORVU.MOREX.r2.2HG0090510
HORVU.MOREX.r2.2HG0091040
HORVU.MOREX.r2.2HG0091190
HORVU.MOREX.r2.2HG0091280
HORVU.MOREX.r2.2HG0091470
HORVU.MOREX.r2.2HG0091540
HORVU.MOREX.r2.2HG0091650
HORVU.MOREX.r2.2HG0091770
HORVU.MOREX.r2.2HG0091800
HORVU.MOREX.r2.2HG0091910
HORVU.MOREX.r2.2HG0091950
HORVU.MOREX.r2.2HG0092100
HORVU.MOREX.r2.2HG0092260
HORVU.MOREX.r2.2HG0092290
HORVU.MOREX.r2.2HG0092400
HORVU.MOREX.r2.2HG0092670
HORVU.MOREX.r2.2HG0092830
HORVU.MOREX.r2.2HG0092980
HORVU.MOREX.r2.2HG0092990
HORVU.MOREX.r2.2HG0093150
HORVU.MOREX.r2.2HG0093290
HORVU.MOREX.r2.2HG0093320
HORVU.MOREX.r2.2HG0093330
HORVU.MOREX.r2.2HG0093360
HORVU.MOREX.r2.2HG0093470
HORVU.MOREX.r2.2HG0093480
HORVU.MOREX.r2.2HG0093570
HORVU.MOREX.r2.2HG0093580
HORVU.MOREX.r2.2HG0093780
HORVU.MOREX.r2.2HG0093910
HORVU.MOREX.r2.2HG0093920
HORVU.MOREX.r2.2HG0093960
HORVU.MOREX.r2.2HG0094250
HORVU.MOREX.r2.2HG0094260
HORVU.MOREX.r2.2HG0094490
HORVU.MOREX.r2.2HG0094710
HORVU.MOREX.r2.2HG0094840
HORVU.MOREX.r2.2HG0094850
HORVU.MOREX.r2.2HG0095170
HORVU.MOREX.r2.2HG0095180
HORVU.MOREX.r2.2HG0095190
HORVU.MOREX.r2.2HG0095380
HORVU.MOREX.r2.2HG0095480
HORVU.MOREX.r2.2HG0095500
HORVU.MOREX.r2.2HG0095580
HORVU.MOREX.r2.2HG0095650
HORVU.MOREX.r2.2HG0095670
HORVU.MOREX.r2.2HG0095680
HORVU.MOREX.r2.2HG0095690
HORVU.MOREX.r2.2HG0095710
HORVU.MOREX.r2.2HG0095720
HORVU.MOREX.r2.2HG0095820
HORVU.MOREX.r2.2HG0095910
HORVU.MOREX.r2.2HG0095970
HORVU.MOREX.r2.2HG0096090
HORVU.MOREX.r2.2HG0096260
HORVU.MOREX.r2.2HG0096270
HORVU.MOREX.r2.2HG0096310
HORVU.MOREX.r2.2HG0096490
HORVU.MOREX.r2.2HG0096600
HORVU.MOREX.r2.2HG0097190
HORVU.MOREX.r2.2HG0097480
HORVU.MOREX.r2.2HG0097490
HORVU.MOREX.r2.2HG0097590
HORVU.MOREX.r2.2HG0097680
HORVU.MOREX.r2.2HG0097920
HORVU.MOREX.r2.2HG0098010
HORVU.MOREX.r2.2HG0098050
HORVU.MOREX.r2.2HG0098140
HORVU.MOREX.r2.2HG0098330
HORVU.MOREX.r2.2HG0098350
HORVU.MOREX.r2.2HG0098430
HORVU.MOREX.r2.2HG0098610
HORVU.MOREX.r2.2HG0098630
HORVU.MOREX.r2.2HG0098660
HORVU.MOREX.r2.2HG0098700
HORVU.MOREX.r2.2HG0098710
HORVU.MOREX.r2.2HG0098730
HORVU.MOREX.r2.2HG0099010
HORVU.MOREX.r2.2HG0099170
HORVU.MOREX.r2.2HG0099720
HORVU.MOREX.r2.2HG0099730
HORVU.MOREX.r2.2HG0099840
HORVU.MOREX.r2.2HG0099970
HORVU.MOREX.r2.2HG0100170
HORVU.MOREX.r2.2HG0100220
HORVU.MOREX.r2.2HG0100250
HORVU.MOREX.r2.2HG0100310
HORVU.MOREX.r2.2HG0100380
HORVU.MOREX.r2.2HG0100410
HORVU.MOREX.r2.2HG0100520
HORVU.MOREX.r2.2HG0100580
HORVU.MOREX.r2.2HG0100610
HORVU.MOREX.r2.2HG0100650
HORVU.MOREX.r2.2HG0100790
HORVU.MOREX.r2.2HG0100900
HORVU.MOREX.r2.2HG0100940
HORVU.MOREX.r2.2HG0100960
HORVU.MOREX.r2.2HG0101090
HORVU.MOREX.r2.2HG0101540
HORVU.MOREX.r2.2HG0101560
HORVU.MOREX.r2.2HG0101800
HORVU.MOREX.r2.2HG0101880
HORVU.MOREX.r2.2HG0102010
HORVU.MOREX.r2.2HG0102050
HORVU.MOREX.r2.2HG0102100
HORVU.MOREX.r2.2HG0102130
HORVU.MOREX.r2.2HG0102180
HORVU.MOREX.r2.2HG0102190
HORVU.MOREX.r2.2HG0102270
HORVU.MOREX.r2.2HG0102520
HORVU.MOREX.r2.2HG0102830
HORVU.MOREX.r2.2HG0102840
HORVU.MOREX.r2.2HG0102860
HORVU.MOREX.r2.2HG0102880
HORVU.MOREX.r2.2HG0102960
HORVU.MOREX.r2.2HG0102980
HORVU.MOREX.r2.2HG0103090
HORVU.MOREX.r2.2HG0103440
HORVU.MOREX.r2.2HG0103530
HORVU.MOREX.r2.2HG0103930
HORVU.MOREX.r2.2HG0104220
HORVU.MOREX.r2.2HG0104300
HORVU.MOREX.r2.2HG0104620
HORVU.MOREX.r2.2HG0104760
HORVU.MOREX.r2.2HG0104900
HORVU.MOREX.r2.2HG0104920
HORVU.MOREX.r2.2HG0105110
HORVU.MOREX.r2.2HG0105170
HORVU.MOREX.r2.2HG0105470
HORVU.MOREX.r2.2HG0105480
HORVU.MOREX.r2.2HG0105540
HORVU.MOREX.r2.2HG0105800
HORVU.MOREX.r2.2HG0105820
HORVU.MOREX.r2.2HG0105830
HORVU.MOREX.r2.2HG0105890
HORVU.MOREX.r2.2HG0106100
HORVU.MOREX.r2.2HG0106140
HORVU.MOREX.r2.2HG0106180
HORVU.MOREX.r2.2HG0106200
HORVU.MOREX.r2.2HG0106300
HORVU.MOREX.r2.2HG0106400
HORVU.MOREX.r2.2HG0106430
HORVU.MOREX.r2.2HG0106890
HORVU.MOREX.r2.2HG0107040
HORVU.MOREX.r2.2HG0107070
HORVU.MOREX.r2.2HG0107100
HORVU.MOREX.r2.2HG0107290
HORVU.MOREX.r2.2HG0107450
HORVU.MOREX.r2.2HG0107550
HORVU.MOREX.r2.2HG0107630
HORVU.MOREX.r2.2HG0107740
HORVU.MOREX.r2.2HG0107870
HORVU.MOREX.r2.2HG0107970
HORVU.MOREX.r2.2HG0108000
HORVU.MOREX.r2.2HG0108030
HORVU.MOREX.r2.2HG0108200
HORVU.MOREX.r2.2HG0108270
HORVU.MOREX.r2.2HG0108280
HORVU.MOREX.r2.2HG0108310
HORVU.MOREX.r2.2HG0108340
HORVU.MOREX.r2.2HG0108430
HORVU.MOREX.r2.2HG0108530
HORVU.MOREX.r2.2HG0108900
HORVU.MOREX.r2.2HG0109030
HORVU.MOREX.r2.2HG0109090
HORVU.MOREX.r2.2HG0109310
HORVU.MOREX.r2.2HG0109460
HORVU.MOREX.r2.2HG0109550
HORVU.MOREX.r2.2HG0109620
HORVU.MOREX.r2.2HG0109660
HORVU.MOREX.r2.2HG0109710
HORVU.MOREX.r2.2HG0109750
HORVU.MOREX.r2.2HG0109780
HORVU.MOREX.r2.2HG0109920
HORVU.MOREX.r2.2HG0109930
HORVU.MOREX.r2.2HG0109980
HORVU.MOREX.r2.2HG0110010
HORVU.MOREX.r2.2HG0110070
HORVU.MOREX.r2.2HG0110100
HORVU.MOREX.r2.2HG0110160
HORVU.MOREX.r2.2HG0110310
HORVU.MOREX.r2.2HG0110360
HORVU.MOREX.r2.2HG0110620
HORVU.MOREX.r2.2HG0110630
HORVU.MOREX.r2.2HG0110730
HORVU.MOREX.r2.2HG0110820
HORVU.MOREX.r2.2HG0110830
HORVU.MOREX.r2.2HG0110930
HORVU.MOREX.r2.2HG0111000
HORVU.MOREX.r2.2HG0111060
HORVU.MOREX.r2.2HG0111210
HORVU.MOREX.r2.2HG0111370
HORVU.MOREX.r2.2HG0111470
HORVU.MOREX.r2.2HG0111730
HORVU.MOREX.r2.2HG0111810
HORVU.MOREX.r2.2HG0111890
HORVU.MOREX.r2.2HG0111900
HORVU.MOREX.r2.2HG0111920
HORVU.MOREX.r2.2HG0112100
HORVU.MOREX.r2.2HG0112150
HORVU.MOREX.r2.2HG0112310
HORVU.MOREX.r2.2HG0112350
HORVU.MOREX.r2.2HG0112480
HORVU.MOREX.r2.2HG0112510
HORVU.MOREX.r2.2HG0112750
HORVU.MOREX.r2.2HG0112910
HORVU.MOREX.r2.2HG0112970
HORVU.MOREX.r2.2HG0113030
HORVU.MOREX.r2.2HG0113090
HORVU.MOREX.r2.2HG0113300
HORVU.MOREX.r2.2HG0113830
HORVU.MOREX.r2.2HG0113930
HORVU.MOREX.r2.2HG0114190
HORVU.MOREX.r2.2HG0114730
HORVU.MOREX.r2.2HG0114770
HORVU.MOREX.r2.2HG0114780
HORVU.MOREX.r2.2HG0114790
HORVU.MOREX.r2.2HG0115110
HORVU.MOREX.r2.2HG0115120
HORVU.MOREX.r2.2HG0115300
HORVU.MOREX.r2.2HG0115310
HORVU.MOREX.r2.2HG0115410
HORVU.MOREX.r2.2HG0115420
HORVU.MOREX.r2.2HG0115460
HORVU.MOREX.r2.2HG0115550
HORVU.MOREX.r2.2HG0115600
HORVU.MOREX.r2.2HG0115670
HORVU.MOREX.r2.2HG0115680
HORVU.MOREX.r2.2HG0115920
HORVU.MOREX.r2.2HG0115960
HORVU.MOREX.r2.2HG0116140
HORVU.MOREX.r2.2HG0116160
HORVU.MOREX.r2.2HG0116450
HORVU.MOREX.r2.2HG0116510
HORVU.MOREX.r2.2HG0116530
HORVU.MOREX.r2.2HG0116600
HORVU.MOREX.r2.2HG0116760
HORVU.MOREX.r2.2HG0116960
HORVU.MOREX.r2.2HG0116980
HORVU.MOREX.r2.2HG0117020
HORVU.MOREX.r2.2HG0117060
HORVU.MOREX.r2.2HG0117130
HORVU.MOREX.r2.2HG0117350
HORVU.MOREX.r2.2HG0117370
HORVU.MOREX.r2.2HG0117400
HORVU.MOREX.r2.2HG0117500
HORVU.MOREX.r2.2HG0117550
HORVU.MOREX.r2.2HG0117650
HORVU.MOREX.r2.2HG0117720
HORVU.MOREX.r2.2HG0117750
HORVU.MOREX.r2.2HG0118000
HORVU.MOREX.r2.2HG0118360
HORVU.MOREX.r2.2HG0118370
HORVU.MOREX.r2.2HG0118450
HORVU.MOREX.r2.2HG0118730
HORVU.MOREX.r2.2HG0118790
HORVU.MOREX.r2.2HG0118810
HORVU.MOREX.r2.2HG0119160
HORVU.MOREX.r2.2HG0119220
HORVU.MOREX.r2.2HG0119380
HORVU.MOREX.r2.2HG0119430
HORVU.MOREX.r2.2HG0119620
HORVU.MOREX.r2.2HG0119630
HORVU.MOREX.r2.2HG0119800
HORVU.MOREX.r2.2HG0119820
HORVU.MOREX.r2.2HG0119940
HORVU.MOREX.r2.2HG0119970
HORVU.MOREX.r2.2HG0119990
HORVU.MOREX.r2.2HG0120170
HORVU.MOREX.r2.2HG0120240
HORVU.MOREX.r2.2HG0120330
HORVU.MOREX.r2.2HG0120380
HORVU.MOREX.r2.2HG0120510
HORVU.MOREX.r2.2HG0120560
HORVU.MOREX.r2.2HG0120600
HORVU.MOREX.r2.2HG0120610
HORVU.MOREX.r2.2HG0120940
HORVU.MOREX.r2.2HG0121020
HORVU.MOREX.r2.2HG0121050
HORVU.MOREX.r2.2HG0121090
HORVU.MOREX.r2.2HG0121200
HORVU.MOREX.r2.2HG0121310
HORVU.MOREX.r2.2HG0121430
HORVU.MOREX.r2.2HG0121490
HORVU.MOREX.r2.2HG0121570
HORVU.MOREX.r2.2HG0121590
HORVU.MOREX.r2.2HG0121930
HORVU.MOREX.r2.2HG0122280
HORVU.MOREX.r2.2HG0122340
HORVU.MOREX.r2.2HG0122350
HORVU.MOREX.r2.2HG0122610
HORVU.MOREX.r2.2HG0122620
HORVU.MOREX.r2.2HG0122920
HORVU.MOREX.r2.2HG0122960
HORVU.MOREX.r2.2HG0123040
HORVU.MOREX.r2.2HG0123200
HORVU.MOREX.r2.2HG0123500
HORVU.MOREX.r2.2HG0123550
HORVU.MOREX.r2.2HG0123590
HORVU.MOREX.r2.2HG0123640
HORVU.MOREX.r2.2HG0123740
HORVU.MOREX.r2.2HG0124120
HORVU.MOREX.r2.2HG0124220
HORVU.MOREX.r2.2HG0124350
HORVU.MOREX.r2.2HG0124380
HORVU.MOREX.r2.2HG0124630
HORVU.MOREX.r2.2HG0124820
HORVU.MOREX.r2.2HG0124890
HORVU.MOREX.r2.2HG0125120
HORVU.MOREX.r2.2HG0125170
HORVU.MOREX.r2.2HG0125200
HORVU.MOREX.r2.2HG0125210
HORVU.MOREX.r2.2HG0125390
HORVU.MOREX.r2.2HG0125400
HORVU.MOREX.r2.2HG0125530
HORVU.MOREX.r2.2HG0125780
HORVU.MOREX.r2.2HG0126140
HORVU.MOREX.r2.2HG0126150
HORVU.MOREX.r2.2HG0126160
HORVU.MOREX.r2.2HG0126270
HORVU.MOREX.r2.2HG0126330
HORVU.MOREX.r2.2HG0126350
HORVU.MOREX.r2.2HG0126470
HORVU.MOREX.r2.2HG0126580
HORVU.MOREX.r2.2HG0126590
HORVU.MOREX.r2.2HG0126790
HORVU.MOREX.r2.2HG0126800
HORVU.MOREX.r2.2HG0126820
HORVU.MOREX.r2.2HG0126990
HORVU.MOREX.r2.2HG0127140
HORVU.MOREX.r2.2HG0127180
HORVU.MOREX.r2.2HG0127360
HORVU.MOREX.r2.2HG0127380
HORVU.MOREX.r2.2HG0127410
HORVU.MOREX.r2.2HG0127460
HORVU.MOREX.r2.2HG0128300
HORVU.MOREX.r2.2HG0128450
HORVU.MOREX.r2.2HG0128650
HORVU.MOREX.r2.2HG0128880
HORVU.MOREX.r2.2HG0129000
HORVU.MOREX.r2.2HG0129260
HORVU.MOREX.r2.2HG0129530
HORVU.MOREX.r2.2HG0129600
HORVU.MOREX.r2.2HG0129810
HORVU.MOREX.r2.2HG0129820
HORVU.MOREX.r2.2HG0129850
HORVU.MOREX.r2.2HG0129900
HORVU.MOREX.r2.2HG0129920
HORVU.MOREX.r2.2HG0129950
HORVU.MOREX.r2.2HG0130010
HORVU.MOREX.r2.2HG0130180
HORVU.MOREX.r2.2HG0130200
HORVU.MOREX.r2.2HG0130220
HORVU.MOREX.r2.2HG0130470
HORVU.MOREX.r2.2HG0130620
HORVU.MOREX.r2.2HG0130740
HORVU.MOREX.r2.2HG0130750
HORVU.MOREX.r2.2HG0130760
HORVU.MOREX.r2.2HG0130820
HORVU.MOREX.r2.2HG0130920
HORVU.MOREX.r2.2HG0131180
HORVU.MOREX.r2.2HG0131360
HORVU.MOREX.r2.2HG0131510
HORVU.MOREX.r2.2HG0131660
HORVU.MOREX.r2.2HG0131710
HORVU.MOREX.r2.2HG0131720
HORVU.MOREX.r2.2HG0132020
HORVU.MOREX.r2.2HG0132110
HORVU.MOREX.r2.2HG0132130
HORVU.MOREX.r2.2HG0132180
HORVU.MOREX.r2.2HG0132390
HORVU.MOREX.r2.2HG0132430
HORVU.MOREX.r2.2HG0132480
HORVU.MOREX.r2.2HG0132690
HORVU.MOREX.r2.2HG0132760
HORVU.MOREX.r2.2HG0132800
HORVU.MOREX.r2.2HG0133000
HORVU.MOREX.r2.2HG0133060
HORVU.MOREX.r2.2HG0133090
HORVU.MOREX.r2.2HG0133110
HORVU.MOREX.r2.2HG0133120
HORVU.MOREX.r2.2HG0133140
HORVU.MOREX.r2.2HG0133290
HORVU.MOREX.r2.2HG0133370
HORVU.MOREX.r2.2HG0133390
HORVU.MOREX.r2.2HG0133400
HORVU.MOREX.r2.2HG0133650
HORVU.MOREX.r2.2HG0133660
HORVU.MOREX.r2.2HG0133920
HORVU.MOREX.r2.2HG0133980
HORVU.MOREX.r2.2HG0134050
HORVU.MOREX.r2.2HG0134200
HORVU.MOREX.r2.2HG0134210
HORVU.MOREX.r2.2HG0134330
HORVU.MOREX.r2.2HG0134380
HORVU.MOREX.r2.2HG0134470
HORVU.MOREX.r2.2HG0134610
HORVU.MOREX.r2.2HG0134730
HORVU.MOREX.r2.2HG0135010
HORVU.MOREX.r2.2HG0135060
HORVU.MOREX.r2.2HG0135360
HORVU.MOREX.r2.2HG0135400
HORVU.MOREX.r2.2HG0135500
HORVU.MOREX.r2.2HG0135590
HORVU.MOREX.r2.2HG0135600
HORVU.MOREX.r2.2HG0135630
HORVU.MOREX.r2.2HG0135740
HORVU.MOREX.r2.2HG0135900
HORVU.MOREX.r2.2HG0135950
HORVU.MOREX.r2.2HG0136100
HORVU.MOREX.r2.2HG0136120
HORVU.MOREX.r2.2HG0136230
HORVU.MOREX.r2.2HG0136260
HORVU.MOREX.r2.2HG0136660
HORVU.MOREX.r2.2HG0136690
HORVU.MOREX.r2.2HG0136700
HORVU.MOREX.r2.2HG0136710
HORVU.MOREX.r2.2HG0136750
HORVU.MOREX.r2.2HG0136770
HORVU.MOREX.r2.2HG0137040
HORVU.MOREX.r2.2HG0137050
HORVU.MOREX.r2.2HG0137060
HORVU.MOREX.r2.2HG0137280
HORVU.MOREX.r2.2HG0137290
HORVU.MOREX.r2.2HG0137360
HORVU.MOREX.r2.2HG0137420
HORVU.MOREX.r2.2HG0137450
HORVU.MOREX.r2.2HG0137460
HORVU.MOREX.r2.2HG0137550
HORVU.MOREX.r2.2HG0137570
HORVU.MOREX.r2.2HG0137720
HORVU.MOREX.r2.2HG0137760
HORVU.MOREX.r2.2HG0137830
HORVU.MOREX.r2.2HG0138050
HORVU.MOREX.r2.2HG0138110
HORVU.MOREX.r2.2HG0138640
HORVU.MOREX.r2.2HG0138650
HORVU.MOREX.r2.2HG0138750
HORVU.MOREX.r2.2HG0138790
HORVU.MOREX.r2.2HG0138800
HORVU.MOREX.r2.2HG0138840
HORVU.MOREX.r2.2HG0138950
HORVU.MOREX.r2.2HG0139140
HORVU.MOREX.r2.2HG0139160
HORVU.MOREX.r2.2HG0139210
HORVU.MOREX.r2.2HG0139240
HORVU.MOREX.r2.2HG0139300
[truncated: 10,759 more rows]

## Sheet: Table S6 M2 H3K9ac
Table S6. Genes marked with H3K9ac in M2
HORVU.MOREX.r2.1HG0000020
HORVU.MOREX.r2.1HG0000740
HORVU.MOREX.r2.1HG0001540
HORVU.MOREX.r2.1HG0001910
HORVU.MOREX.r2.1HG0001920
HORVU.MOREX.r2.1HG0001940
HORVU.MOREX.r2.1HG0002020
HORVU.MOREX.r2.1HG0002190
HORVU.MOREX.r2.1HG0003010
HORVU.MOREX.r2.1HG0003270
HORVU.MOREX.r2.1HG0003500
HORVU.MOREX.r2.1HG0003630
HORVU.MOREX.r2.1HG0004230
HORVU.MOREX.r2.1HG0004810
HORVU.MOREX.r2.1HG0004930
HORVU.MOREX.r2.1HG0004960
HORVU.MOREX.r2.1HG0005300
HORVU.MOREX.r2.1HG0005390
HORVU.MOREX.r2.1HG0006240
HORVU.MOREX.r2.1HG0006290
HORVU.MOREX.r2.1HG0006570
HORVU.MOREX.r2.1HG0006620
HORVU.MOREX.r2.1HG0007110
HORVU.MOREX.r2.1HG0007520
HORVU.MOREX.r2.1HG0007850
HORVU.MOREX.r2.1HG0008450
HORVU.MOREX.r2.1HG0008510
HORVU.MOREX.r2.1HG0008580
HORVU.MOREX.r2.1HG0008630
HORVU.MOREX.r2.1HG0008650
HORVU.MOREX.r2.1HG0008710
HORVU.MOREX.r2.1HG0008730
HORVU.MOREX.r2.1HG0008760
HORVU.MOREX.r2.1HG0008810
HORVU.MOREX.r2.1HG0008950
HORVU.MOREX.r2.1HG0009110
HORVU.MOREX.r2.1HG0009170
HORVU.MOREX.r2.1HG0009180
HORVU.MOREX.r2.1HG0010390
HORVU.MOREX.r2.1HG0010500
HORVU.MOREX.r2.1HG0010660
HORVU.MOREX.r2.1HG0010970
HORVU.MOREX.r2.1HG0011080
HORVU.MOREX.r2.1HG0011100
HORVU.MOREX.r2.1HG0011520
HORVU.MOREX.r2.1HG0012650
HORVU.MOREX.r2.1HG0012790
HORVU.MOREX.r2.1HG0012920
HORVU.MOREX.r2.1HG0013310
HORVU.MOREX.r2.1HG0013780
HORVU.MOREX.r2.1HG0014060
HORVU.MOREX.r2.1HG0014080
HORVU.MOREX.r2.1HG0014120
HORVU.MOREX.r2.1HG0014170
HORVU.MOREX.r2.1HG0015010
HORVU.MOREX.r2.1HG0015060
HORVU.MOREX.r2.1HG0015100
HORVU.MOREX.r2.1HG0015160
HORVU.MOREX.r2.1HG0015870
HORVU.MOREX.r2.1HG0015920
HORVU.MOREX.r2.1HG0015950
HORVU.MOREX.r2.1HG0016110
HORVU.MOREX.r2.1HG0016200
HORVU.MOREX.r2.1HG0016510
HORVU.MOREX.r2.1HG0016570
HORVU.MOREX.r2.1HG0017110
HORVU.MOREX.r2.1HG0017310
HORVU.MOREX.r2.1HG0017400
HORVU.MOREX.r2.1HG0017490
HORVU.MOREX.r2.1HG0017810
HORVU.MOREX.r2.1HG0018170
HORVU.MOREX.r2.1HG0018560
HORVU.MOREX.r2.1HG0018630
HORVU.MOREX.r2.1HG0018640
HORVU.MOREX.r2.1HG0018780
HORVU.MOREX.r2.1HG0018800
HORVU.MOREX.r2.1HG0018900
HORVU.MOREX.r2.1HG0018950
HORVU.MOREX.r2.1HG0019210
HORVU.MOREX.r2.1HG0019310
HORVU.MOREX.r2.1HG0019680
HORVU.MOREX.r2.1HG0019780
HORVU.MOREX.r2.1HG0020280
HORVU.MOREX.r2.1HG0020320
HORVU.MOREX.r2.1HG0020540
HORVU.MOREX.r2.1HG0020610
HORVU.MOREX.r2.1HG0020750
HORVU.MOREX.r2.1HG0020770
HORVU.MOREX.r2.1HG0021270
HORVU.MOREX.r2.1HG0021310
HORVU.MOREX.r2.1HG0021320
HORVU.MOREX.r2.1HG0021410
HORVU.MOREX.r2.1HG0021490
HORVU.MOREX.r2.1HG0021740
HORVU.MOREX.r2.1HG0021840
HORVU.MOREX.r2.1HG0022090
HORVU.MOREX.r2.1HG0022990
HORVU.MOREX.r2.1HG0023480
HORVU.MOREX.r2.1HG0023540
HORVU.MOREX.r2.1HG0023650
HORVU.MOREX.r2.1HG0024080
HORVU.MOREX.r2.1HG0024540
HORVU.MOREX.r2.1HG0024620
HORVU.MOREX.r2.1HG0024940
HORVU.MOREX.r2.1HG0025060
HORVU.MOREX.r2.1HG0025280
HORVU.MOREX.r2.1HG0025620
HORVU.MOREX.r2.1HG0025760
HORVU.MOREX.r2.1HG0026490
HORVU.MOREX.r2.1HG0026520
HORVU.MOREX.r2.1HG0026900
HORVU.MOREX.r2.1HG0027030
HORVU.MOREX.r2.1HG0027120
HORVU.MOREX.r2.1HG0027260
HORVU.MOREX.r2.1HG0027280
HORVU.MOREX.r2.1HG0027480
HORVU.MOREX.r2.1HG0027640
HORVU.MOREX.r2.1HG0028090
HORVU.MOREX.r2.1HG0028340
HORVU.MOREX.r2.1HG0028440
HORVU.MOREX.r2.1HG0028630
HORVU.MOREX.r2.1HG0028710
HORVU.MOREX.r2.1HG0028720
HORVU.MOREX.r2.1HG0028790
HORVU.MOREX.r2.1HG0029110
HORVU.MOREX.r2.1HG0029160
HORVU.MOREX.r2.1HG0029240
HORVU.MOREX.r2.1HG0029450
HORVU.MOREX.r2.1HG0029460
HORVU.MOREX.r2.1HG0029500
HORVU.MOREX.r2.1HG0029540
HORVU.MOREX.r2.1HG0029940
HORVU.MOREX.r2.1HG0029960
HORVU.MOREX.r2.1HG0030460
HORVU.MOREX.r2.1HG0030470
HORVU.MOREX.r2.1HG0030920
HORVU.MOREX.r2.1HG0031180
HORVU.MOREX.r2.1HG0031880
HORVU.MOREX.r2.1HG0031930
HORVU.MOREX.r2.1HG0032080
HORVU.MOREX.r2.1HG0032340
HORVU.MOREX.r2.1HG0032390
HORVU.MOREX.r2.1HG0032850
HORVU.MOREX.r2.1HG0033090
HORVU.MOREX.r2.1HG0033100
HORVU.MOREX.r2.1HG0033150
HORVU.MOREX.r2.1HG0033380
HORVU.MOREX.r2.1HG0033390
HORVU.MOREX.r2.1HG0033460
HORVU.MOREX.r2.1HG0033810
HORVU.MOREX.r2.1HG0033860
HORVU.MOREX.r2.1HG0034160
HORVU.MOREX.r2.1HG0034250
HORVU.MOREX.r2.1HG0034530
HORVU.MOREX.r2.1HG0034980
HORVU.MOREX.r2.1HG0035040
HORVU.MOREX.r2.1HG0035050
HORVU.MOREX.r2.1HG0035260
HORVU.MOREX.r2.1HG0035290
HORVU.MOREX.r2.1HG0035340
HORVU.MOREX.r2.1HG0035360
HORVU.MOREX.r2.1HG0035720
HORVU.MOREX.r2.1HG0035800
HORVU.MOREX.r2.1HG0036020
HORVU.MOREX.r2.1HG0036120
HORVU.MOREX.r2.1HG0036440
HORVU.MOREX.r2.1HG0037040
HORVU.MOREX.r2.1HG0037100
HORVU.MOREX.r2.1HG0037110
HORVU.MOREX.r2.1HG0037120
HORVU.MOREX.r2.1HG0037240
HORVU.MOREX.r2.1HG0037280
HORVU.MOREX.r2.1HG0038050
HORVU.MOREX.r2.1HG0038570
HORVU.MOREX.r2.1HG0038600
HORVU.MOREX.r2.1HG0038720
HORVU.MOREX.r2.1HG0038930
HORVU.MOREX.r2.1HG0038950
HORVU.MOREX.r2.1HG0039170
HORVU.MOREX.r2.1HG0039540
HORVU.MOREX.r2.1HG0039580
HORVU.MOREX.r2.1HG0039850
HORVU.MOREX.r2.1HG0040060
HORVU.MOREX.r2.1HG0040070
HORVU.MOREX.r2.1HG0040100
HORVU.MOREX.r2.1HG0040290
HORVU.MOREX.r2.1HG0040640
HORVU.MOREX.r2.1HG0040660
HORVU.MOREX.r2.1HG0040680
HORVU.MOREX.r2.1HG0040840
HORVU.MOREX.r2.1HG0040870
HORVU.MOREX.r2.1HG0040930
HORVU.MOREX.r2.1HG0041280
HORVU.MOREX.r2.1HG0041290
HORVU.MOREX.r2.1HG0041360
HORVU.MOREX.r2.1HG0041540
HORVU.MOREX.r2.1HG0041620
HORVU.MOREX.r2.1HG0041730
HORVU.MOREX.r2.1HG0041740
HORVU.MOREX.r2.1HG0041760
HORVU.MOREX.r2.1HG0041850
HORVU.MOREX.r2.1HG0041940
HORVU.MOREX.r2.1HG0041990
HORVU.MOREX.r2.1HG0042120
HORVU.MOREX.r2.1HG0042220
HORVU.MOREX.r2.1HG0042240
HORVU.MOREX.r2.1HG0042280
HORVU.MOREX.r2.1HG0042330
HORVU.MOREX.r2.1HG0042770
HORVU.MOREX.r2.1HG0042810
HORVU.MOREX.r2.1HG0042930
HORVU.MOREX.r2.1HG0043550
HORVU.MOREX.r2.1HG0043680
HORVU.MOREX.r2.1HG0043920
HORVU.MOREX.r2.1HG0044040
HORVU.MOREX.r2.1HG0044770
HORVU.MOREX.r2.1HG0044970
HORVU.MOREX.r2.1HG0045220
HORVU.MOREX.r2.1HG0045410
HORVU.MOREX.r2.1HG0045440
HORVU.MOREX.r2.1HG0045500
HORVU.MOREX.r2.1HG0045760
HORVU.MOREX.r2.1HG0045810
HORVU.MOREX.r2.1HG0045890
HORVU.MOREX.r2.1HG0045910
HORVU.MOREX.r2.1HG0046050
HORVU.MOREX.r2.1HG0046210
HORVU.MOREX.r2.1HG0046540
HORVU.MOREX.r2.1HG0046800
HORVU.MOREX.r2.1HG0046830
HORVU.MOREX.r2.1HG0046850
HORVU.MOREX.r2.1HG0047000
HORVU.MOREX.r2.1HG0047050
HORVU.MOREX.r2.1HG0047070
HORVU.MOREX.r2.1HG0047120
HORVU.MOREX.r2.1HG0047520
HORVU.MOREX.r2.1HG0047970
HORVU.MOREX.r2.1HG0048300
HORVU.MOREX.r2.1HG0048540
HORVU.MOREX.r2.1HG0048580
HORVU.MOREX.r2.1HG0048610
HORVU.MOREX.r2.1HG0049060
HORVU.MOREX.r2.1HG0049150
HORVU.MOREX.r2.1HG0049200
HORVU.MOREX.r2.1HG0049310
HORVU.MOREX.r2.1HG0049370
HORVU.MOREX.r2.1HG0049650
HORVU.MOREX.r2.1HG0049710
HORVU.MOREX.r2.1HG0049770
HORVU.MOREX.r2.1HG0049810
HORVU.MOREX.r2.1HG0049900
HORVU.MOREX.r2.1HG0049950
HORVU.MOREX.r2.1HG0050060
HORVU.MOREX.r2.1HG0050100
HORVU.MOREX.r2.1HG0050150
HORVU.MOREX.r2.1HG0050170
HORVU.MOREX.r2.1HG0050270
HORVU.MOREX.r2.1HG0050340
HORVU.MOREX.r2.1HG0050420
HORVU.MOREX.r2.1HG0050430
HORVU.MOREX.r2.1HG0050460
HORVU.MOREX.r2.1HG0050840
HORVU.MOREX.r2.1HG0050900
HORVU.MOREX.r2.1HG0051010
HORVU.MOREX.r2.1HG0051160
HORVU.MOREX.r2.1HG0051280
HORVU.MOREX.r2.1HG0051320
HORVU.MOREX.r2.1HG0051640
HORVU.MOREX.r2.1HG0051860
HORVU.MOREX.r2.1HG0051920
HORVU.MOREX.r2.1HG0052590
HORVU.MOREX.r2.1HG0052870
HORVU.MOREX.r2.1HG0052920
HORVU.MOREX.r2.1HG0053020
HORVU.MOREX.r2.1HG0053170
HORVU.MOREX.r2.1HG0053340
HORVU.MOREX.r2.1HG0053920
HORVU.MOREX.r2.1HG0054550
HORVU.MOREX.r2.1HG0054750
HORVU.MOREX.r2.1HG0054820
HORVU.MOREX.r2.1HG0055060
HORVU.MOREX.r2.1HG0055450
HORVU.MOREX.r2.1HG0056000
HORVU.MOREX.r2.1HG0056030
HORVU.MOREX.r2.1HG0056040
HORVU.MOREX.r2.1HG0056070
HORVU.MOREX.r2.1HG0056100
HORVU.MOREX.r2.1HG0056110
HORVU.MOREX.r2.1HG0056140
HORVU.MOREX.r2.1HG0056180
HORVU.MOREX.r2.1HG0056240
HORVU.MOREX.r2.1HG0056320
HORVU.MOREX.r2.1HG0056390
HORVU.MOREX.r2.1HG0056600
HORVU.MOREX.r2.1HG0056620
HORVU.MOREX.r2.1HG0057350
HORVU.MOREX.r2.1HG0057360
HORVU.MOREX.r2.1HG0057550
HORVU.MOREX.r2.1HG0058040
HORVU.MOREX.r2.1HG0058580
HORVU.MOREX.r2.1HG0058750
HORVU.MOREX.r2.1HG0059060
HORVU.MOREX.r2.1HG0059160
HORVU.MOREX.r2.1HG0059200
HORVU.MOREX.r2.1HG0059240
HORVU.MOREX.r2.1HG0059250
HORVU.MOREX.r2.1HG0059260
HORVU.MOREX.r2.1HG0059510
HORVU.MOREX.r2.1HG0059670
HORVU.MOREX.r2.1HG0059890
HORVU.MOREX.r2.1HG0059900
HORVU.MOREX.r2.1HG0060050
HORVU.MOREX.r2.1HG0060080
HORVU.MOREX.r2.1HG0060170
HORVU.MOREX.r2.1HG0060470
HORVU.MOREX.r2.1HG0060510
HORVU.MOREX.r2.1HG0060690
HORVU.MOREX.r2.1HG0060880
HORVU.MOREX.r2.1HG0060990
HORVU.MOREX.r2.1HG0061190
HORVU.MOREX.r2.1HG0061210
HORVU.MOREX.r2.1HG0061220
HORVU.MOREX.r2.1HG0061410
HORVU.MOREX.r2.1HG0061580
HORVU.MOREX.r2.1HG0061930
HORVU.MOREX.r2.1HG0062250
HORVU.MOREX.r2.1HG0062370
HORVU.MOREX.r2.1HG0062410
HORVU.MOREX.r2.1HG0062670
HORVU.MOREX.r2.1HG0063070
HORVU.MOREX.r2.1HG0063140
HORVU.MOREX.r2.1HG0063260
HORVU.MOREX.r2.1HG0063340
HORVU.MOREX.r2.1HG0063390
HORVU.MOREX.r2.1HG0063650
HORVU.MOREX.r2.1HG0063710
HORVU.MOREX.r2.1HG0063720
HORVU.MOREX.r2.1HG0063860
HORVU.MOREX.r2.1HG0063900
HORVU.MOREX.r2.1HG0063930
HORVU.MOREX.r2.1HG0063980
HORVU.MOREX.r2.1HG0064090
HORVU.MOREX.r2.1HG0064550
HORVU.MOREX.r2.1HG0064610
HORVU.MOREX.r2.1HG0064900
HORVU.MOREX.r2.1HG0064940
HORVU.MOREX.r2.1HG0065460
HORVU.MOREX.r2.1HG0065480
HORVU.MOREX.r2.1HG0065710
HORVU.MOREX.r2.1HG0066160
HORVU.MOREX.r2.1HG0066180
HORVU.MOREX.r2.1HG0066190
HORVU.MOREX.r2.1HG0066400
HORVU.MOREX.r2.1HG0066840
HORVU.MOREX.r2.1HG0066850
HORVU.MOREX.r2.1HG0066900
HORVU.MOREX.r2.1HG0067070
HORVU.MOREX.r2.1HG0067080
HORVU.MOREX.r2.1HG0067220
HORVU.MOREX.r2.1HG0067490
HORVU.MOREX.r2.1HG0067540
HORVU.MOREX.r2.1HG0067820
HORVU.MOREX.r2.1HG0067830
HORVU.MOREX.r2.1HG0067840
HORVU.MOREX.r2.1HG0067900
HORVU.MOREX.r2.1HG0068050
HORVU.MOREX.r2.1HG0068210
HORVU.MOREX.r2.1HG0068420
HORVU.MOREX.r2.1HG0068680
HORVU.MOREX.r2.1HG0069670
HORVU.MOREX.r2.1HG0069860
HORVU.MOREX.r2.1HG0069880
HORVU.MOREX.r2.1HG0069900
HORVU.MOREX.r2.1HG0070250
HORVU.MOREX.r2.1HG0070310
HORVU.MOREX.r2.1HG0071020
HORVU.MOREX.r2.1HG0071270
HORVU.MOREX.r2.1HG0071510
HORVU.MOREX.r2.1HG0071830
HORVU.MOREX.r2.1HG0072050
HORVU.MOREX.r2.1HG0072140
HORVU.MOREX.r2.1HG0072340
HORVU.MOREX.r2.1HG0072750
HORVU.MOREX.r2.1HG0073120
HORVU.MOREX.r2.1HG0073210
HORVU.MOREX.r2.1HG0073230
HORVU.MOREX.r2.1HG0073640
HORVU.MOREX.r2.1HG0074000
HORVU.MOREX.r2.1HG0074100
HORVU.MOREX.r2.1HG0074170
HORVU.MOREX.r2.1HG0074190
HORVU.MOREX.r2.1HG0074290
HORVU.MOREX.r2.1HG0075140
HORVU.MOREX.r2.1HG0075150
HORVU.MOREX.r2.1HG0075440
HORVU.MOREX.r2.1HG0075470
HORVU.MOREX.r2.1HG0075480
HORVU.MOREX.r2.1HG0075920
HORVU.MOREX.r2.1HG0076180
HORVU.MOREX.r2.1HG0076430
HORVU.MOREX.r2.1HG0077480
HORVU.MOREX.r2.1HG0077910
HORVU.MOREX.r2.1HG0078020
HORVU.MOREX.r2.1HG0078100
HORVU.MOREX.r2.1HG0078200
HORVU.MOREX.r2.1HG0078240
HORVU.MOREX.r2.1HG0078380
HORVU.MOREX.r2.1HG0078400
HORVU.MOREX.r2.1HG0078510
HORVU.MOREX.r2.1HG0078650
HORVU.MOREX.r2.1HG0000050
HORVU.MOREX.r2.1HG0000060
HORVU.MOREX.r2.1HG0000070
HORVU.MOREX.r2.1HG0000450
HORVU.MOREX.r2.1HG0000730
HORVU.MOREX.r2.1HG0001530
HORVU.MOREX.r2.1HG0001580
HORVU.MOREX.r2.1HG0001590
HORVU.MOREX.r2.1HG0001980
HORVU.MOREX.r2.1HG0002140
HORVU.MOREX.r2.1HG0002170
HORVU.MOREX.r2.1HG0002200
HORVU.MOREX.r2.1HG0002310
HORVU.MOREX.r2.1HG0002320
HORVU.MOREX.r2.1HG0002410
HORVU.MOREX.r2.1HG0002860
HORVU.MOREX.r2.1HG0003050
HORVU.MOREX.r2.1HG0003080
HORVU.MOREX.r2.1HG0003470
HORVU.MOREX.r2.1HG0003760
HORVU.MOREX.r2.1HG0003870
HORVU.MOREX.r2.1HG0004080
HORVU.MOREX.r2.1HG0004130
HORVU.MOREX.r2.1HG0004700
HORVU.MOREX.r2.1HG0004740
HORVU.MOREX.r2.1HG0004760
HORVU.MOREX.r2.1HG0005810
HORVU.MOREX.r2.1HG0005860
HORVU.MOREX.r2.1HG0005880
HORVU.MOREX.r2.1HG0006200
HORVU.MOREX.r2.1HG0006400
HORVU.MOREX.r2.1HG0006540
HORVU.MOREX.r2.1HG0007340
HORVU.MOREX.r2.1HG0007670
HORVU.MOREX.r2.1HG0008120
HORVU.MOREX.r2.1HG0008370
HORVU.MOREX.r2.1HG0009100
HORVU.MOREX.r2.1HG0009140
HORVU.MOREX.r2.1HG0009250
HORVU.MOREX.r2.1HG0010610
HORVU.MOREX.r2.1HG0010640
HORVU.MOREX.r2.1HG0010650
HORVU.MOREX.r2.1HG0010840
HORVU.MOREX.r2.1HG0010950
HORVU.MOREX.r2.1HG0011120
HORVU.MOREX.r2.1HG0011170
HORVU.MOREX.r2.1HG0011320
HORVU.MOREX.r2.1HG0011460
HORVU.MOREX.r2.1HG0011850
HORVU.MOREX.r2.1HG0011910
HORVU.MOREX.r2.1HG0011920
HORVU.MOREX.r2.1HG0012390
HORVU.MOREX.r2.1HG0012580
HORVU.MOREX.r2.1HG0012660
HORVU.MOREX.r2.1HG0012710
HORVU.MOREX.r2.1HG0012730
HORVU.MOREX.r2.1HG0012760
HORVU.MOREX.r2.1HG0013170
HORVU.MOREX.r2.1HG0013190
HORVU.MOREX.r2.1HG0013500
HORVU.MOREX.r2.1HG0013750
HORVU.MOREX.r2.1HG0013790
HORVU.MOREX.r2.1HG0013890
HORVU.MOREX.r2.1HG0013930
HORVU.MOREX.r2.1HG0013960
HORVU.MOREX.r2.1HG0014140
HORVU.MOREX.r2.1HG0014560
HORVU.MOREX.r2.1HG0014570
HORVU.MOREX.r2.1HG0014750
HORVU.MOREX.r2.1HG0014840
HORVU.MOREX.r2.1HG0015080
HORVU.MOREX.r2.1HG0015280
HORVU.MOREX.r2.1HG0015630
HORVU.MOREX.r2.1HG0015690
HORVU.MOREX.r2.1HG0015940
HORVU.MOREX.r2.1HG0016090
HORVU.MOREX.r2.1HG0016100
HORVU.MOREX.r2.1HG0016190
HORVU.MOREX.r2.1HG0016250
HORVU.MOREX.r2.1HG0016430
HORVU.MOREX.r2.1HG0016540
HORVU.MOREX.r2.1HG0016720
HORVU.MOREX.r2.1HG0017160
HORVU.MOREX.r2.1HG0017270
HORVU.MOREX.r2.1HG0017300
HORVU.MOREX.r2.1HG0017350
HORVU.MOREX.r2.1HG0017360
HORVU.MOREX.r2.1HG0017710
HORVU.MOREX.r2.1HG0017770
HORVU.MOREX.r2.1HG0017800
HORVU.MOREX.r2.1HG0017820
HORVU.MOREX.r2.1HG0018100
HORVU.MOREX.r2.1HG0018200
HORVU.MOREX.r2.1HG0018790
HORVU.MOREX.r2.1HG0019110
HORVU.MOREX.r2.1HG0019520
HORVU.MOREX.r2.1HG0019700
HORVU.MOREX.r2.1HG0019910
HORVU.MOREX.r2.1HG0020380
HORVU.MOREX.r2.1HG0020560
HORVU.MOREX.r2.1HG0020600
HORVU.MOREX.r2.1HG0020650
HORVU.MOREX.r2.1HG0021230
HORVU.MOREX.r2.1HG0021290
HORVU.MOREX.r2.1HG0021480
HORVU.MOREX.r2.1HG0021830
HORVU.MOREX.r2.1HG0022130
HORVU.MOREX.r2.1HG0022140
HORVU.MOREX.r2.1HG0022170
HORVU.MOREX.r2.1HG0023100
HORVU.MOREX.r2.1HG0023220
HORVU.MOREX.r2.1HG0023250
HORVU.MOREX.r2.1HG0023270
HORVU.MOREX.r2.1HG0023760
HORVU.MOREX.r2.1HG0024700
HORVU.MOREX.r2.1HG0024740
HORVU.MOREX.r2.1HG0024800
HORVU.MOREX.r2.1HG0025270
HORVU.MOREX.r2.1HG0025600
HORVU.MOREX.r2.1HG0025640
HORVU.MOREX.r2.1HG0025670
HORVU.MOREX.r2.1HG0025750
HORVU.MOREX.r2.1HG0025800
HORVU.MOREX.r2.1HG0025950
HORVU.MOREX.r2.1HG0026100
HORVU.MOREX.r2.1HG0026120
HORVU.MOREX.r2.1HG0026160
HORVU.MOREX.r2.1HG0026400
HORVU.MOREX.r2.1HG0026610
HORVU.MOREX.r2.1HG0026810
HORVU.MOREX.r2.1HG0026840
HORVU.MOREX.r2.1HG0027000
HORVU.MOREX.r2.1HG0027100
HORVU.MOREX.r2.1HG0027140
HORVU.MOREX.r2.1HG0027190
HORVU.MOREX.r2.1HG0027200
HORVU.MOREX.r2.1HG0027350
HORVU.MOREX.r2.1HG0027550
HORVU.MOREX.r2.1HG0027560
HORVU.MOREX.r2.1HG0028190
HORVU.MOREX.r2.1HG0028390
HORVU.MOREX.r2.1HG0028620
HORVU.MOREX.r2.1HG0028700
HORVU.MOREX.r2.1HG0029220
HORVU.MOREX.r2.1HG0029250
HORVU.MOREX.r2.1HG0029270
HORVU.MOREX.r2.1HG0029530
HORVU.MOREX.r2.1HG0029580
HORVU.MOREX.r2.1HG0030330
HORVU.MOREX.r2.1HG0030770
HORVU.MOREX.r2.1HG0030890
HORVU.MOREX.r2.1HG0031720
HORVU.MOREX.r2.1HG0031870
HORVU.MOREX.r2.1HG0032560
HORVU.MOREX.r2.1HG0032840
HORVU.MOREX.r2.1HG0033000
HORVU.MOREX.r2.1HG0033660
HORVU.MOREX.r2.1HG0034090
HORVU.MOREX.r2.1HG0034100
HORVU.MOREX.r2.1HG0034330
HORVU.MOREX.r2.1HG0034380
HORVU.MOREX.r2.1HG0034430
HORVU.MOREX.r2.1HG0034520
HORVU.MOREX.r2.1HG0034570
HORVU.MOREX.r2.1HG0034640
HORVU.MOREX.r2.1HG0034670
HORVU.MOREX.r2.1HG0034680
HORVU.MOREX.r2.1HG0034940
HORVU.MOREX.r2.1HG0035660
HORVU.MOREX.r2.1HG0036010
HORVU.MOREX.r2.1HG0036030
HORVU.MOREX.r2.1HG0036220
HORVU.MOREX.r2.1HG0036240
HORVU.MOREX.r2.1HG0036430
HORVU.MOREX.r2.1HG0036490
HORVU.MOREX.r2.1HG0036690
HORVU.MOREX.r2.1HG0037140
HORVU.MOREX.r2.1HG0037230
HORVU.MOREX.r2.1HG0037340
HORVU.MOREX.r2.1HG0037430
HORVU.MOREX.r2.1HG0037470
HORVU.MOREX.r2.1HG0037930
HORVU.MOREX.r2.1HG0038160
HORVU.MOREX.r2.1HG0038350
HORVU.MOREX.r2.1HG0038670
HORVU.MOREX.r2.1HG0038860
HORVU.MOREX.r2.1HG0039130
HORVU.MOREX.r2.1HG0039160
HORVU.MOREX.r2.1HG0039180
HORVU.MOREX.r2.1HG0039270
HORVU.MOREX.r2.1HG0039530
HORVU.MOREX.r2.1HG0039590
HORVU.MOREX.r2.1HG0039610
HORVU.MOREX.r2.1HG0039700
HORVU.MOREX.r2.1HG0039760
HORVU.MOREX.r2.1HG0039980
HORVU.MOREX.r2.1HG0040340
HORVU.MOREX.r2.1HG0040630
HORVU.MOREX.r2.1HG0040760
HORVU.MOREX.r2.1HG0040820
HORVU.MOREX.r2.1HG0041220
HORVU.MOREX.r2.1HG0041260
HORVU.MOREX.r2.1HG0041400
HORVU.MOREX.r2.1HG0041430
HORVU.MOREX.r2.1HG0041530
HORVU.MOREX.r2.1HG0041690
HORVU.MOREX.r2.1HG0041750
HORVU.MOREX.r2.1HG0041800
HORVU.MOREX.r2.1HG0041840
HORVU.MOREX.r2.1HG0041900
HORVU.MOREX.r2.1HG0041980
HORVU.MOREX.r2.1HG0042180
HORVU.MOREX.r2.1HG0042210
HORVU.MOREX.r2.1HG0042270
HORVU.MOREX.r2.1HG0042350
HORVU.MOREX.r2.1HG0042370
HORVU.MOREX.r2.1HG0042450
HORVU.MOREX.r2.1HG0043540
HORVU.MOREX.r2.1HG0043840
HORVU.MOREX.r2.1HG0044130
HORVU.MOREX.r2.1HG0044140
HORVU.MOREX.r2.1HG0044330
HORVU.MOREX.r2.1HG0044410
HORVU.MOREX.r2.1HG0044670
HORVU.MOREX.r2.1HG0044700
HORVU.MOREX.r2.1HG0044760
HORVU.MOREX.r2.1HG0044870
HORVU.MOREX.r2.1HG0044880
HORVU.MOREX.r2.1HG0044890
HORVU.MOREX.r2.1HG0045430
HORVU.MOREX.r2.1HG0045510
HORVU.MOREX.r2.1HG0045580
HORVU.MOREX.r2.1HG0045690
HORVU.MOREX.r2.1HG0045830
HORVU.MOREX.r2.1HG0045900
HORVU.MOREX.r2.1HG0046130
HORVU.MOREX.r2.1HG0046200
HORVU.MOREX.r2.1HG0046310
HORVU.MOREX.r2.1HG0046590
HORVU.MOREX.r2.1HG0046650
HORVU.MOREX.r2.1HG0046860
HORVU.MOREX.r2.1HG0046940
HORVU.MOREX.r2.1HG0046960
HORVU.MOREX.r2.1HG0047450
HORVU.MOREX.r2.1HG0047510
HORVU.MOREX.r2.1HG0047530
HORVU.MOREX.r2.1HG0047600
HORVU.MOREX.r2.1HG0048000
HORVU.MOREX.r2.1HG0048180
HORVU.MOREX.r2.1HG0048640
HORVU.MOREX.r2.1HG0048720
HORVU.MOREX.r2.1HG0048790
HORVU.MOREX.r2.1HG0048950
HORVU.MOREX.r2.1HG0048990
HORVU.MOREX.r2.1HG0049160
HORVU.MOREX.r2.1HG0049300
HORVU.MOREX.r2.1HG0049330
HORVU.MOREX.r2.1HG0049550
HORVU.MOREX.r2.1HG0049580
HORVU.MOREX.r2.1HG0049610
HORVU.MOREX.r2.1HG0049700
HORVU.MOREX.r2.1HG0049800
HORVU.MOREX.r2.1HG0050050
HORVU.MOREX.r2.1HG0050160
HORVU.MOREX.r2.1HG0050720
HORVU.MOREX.r2.1HG0050820
HORVU.MOREX.r2.1HG0050830
HORVU.MOREX.r2.1HG0051240
HORVU.MOREX.r2.1HG0051260
HORVU.MOREX.r2.1HG0051300
HORVU.MOREX.r2.1HG0051370
HORVU.MOREX.r2.1HG0051390
HORVU.MOREX.r2.1HG0051580
HORVU.MOREX.r2.1HG0051730
HORVU.MOREX.r2.1HG0051850
HORVU.MOREX.r2.1HG0051910
HORVU.MOREX.r2.1HG0051960
HORVU.MOREX.r2.1HG0052390
HORVU.MOREX.r2.1HG0052630
HORVU.MOREX.r2.1HG0052740
HORVU.MOREX.r2.1HG0052890
HORVU.MOREX.r2.1HG0053120
HORVU.MOREX.r2.1HG0053820
HORVU.MOREX.r2.1HG0053830
HORVU.MOREX.r2.1HG0054010
HORVU.MOREX.r2.1HG0054270
HORVU.MOREX.r2.1HG0054280
HORVU.MOREX.r2.1HG0054640
HORVU.MOREX.r2.1HG0054840
HORVU.MOREX.r2.1HG0055180
HORVU.MOREX.r2.1HG0055330
HORVU.MOREX.r2.1HG0055530
HORVU.MOREX.r2.1HG0055630
HORVU.MOREX.r2.1HG0055660
HORVU.MOREX.r2.1HG0055710
HORVU.MOREX.r2.1HG0055730
HORVU.MOREX.r2.1HG0055760
HORVU.MOREX.r2.1HG0055950
HORVU.MOREX.r2.1HG0055960
HORVU.MOREX.r2.1HG0056190
HORVU.MOREX.r2.1HG0056220
HORVU.MOREX.r2.1HG0056230
HORVU.MOREX.r2.1HG0056280
HORVU.MOREX.r2.1HG0056310
HORVU.MOREX.r2.1HG0056360
HORVU.MOREX.r2.1HG0056370
HORVU.MOREX.r2.1HG0056380
HORVU.MOREX.r2.1HG0056970
HORVU.MOREX.r2.1HG0057210
HORVU.MOREX.r2.1HG0057610
HORVU.MOREX.r2.1HG0057640
HORVU.MOREX.r2.1HG0057650
HORVU.MOREX.r2.1HG0057800
HORVU.MOREX.r2.1HG0058210
HORVU.MOREX.r2.1HG0058460
HORVU.MOREX.r2.1HG0058760
HORVU.MOREX.r2.1HG0058820
HORVU.MOREX.r2.1HG0058830
HORVU.MOREX.r2.1HG0059040
HORVU.MOREX.r2.1HG0059290
HORVU.MOREX.r2.1HG0059730
HORVU.MOREX.r2.1HG0059760
HORVU.MOREX.r2.1HG0059970
HORVU.MOREX.r2.1HG0060280
HORVU.MOREX.r2.1HG0060290
HORVU.MOREX.r2.1HG0060950
HORVU.MOREX.r2.1HG0060960
HORVU.MOREX.r2.1HG0060970
HORVU.MOREX.r2.1HG0061060
HORVU.MOREX.r2.1HG0061100
HORVU.MOREX.r2.1HG0061110
HORVU.MOREX.r2.1HG0061200
HORVU.MOREX.r2.1HG0061240
HORVU.MOREX.r2.1HG0061420
HORVU.MOREX.r2.1HG0061480
HORVU.MOREX.r2.1HG0062050
HORVU.MOREX.r2.1HG0062060
HORVU.MOREX.r2.1HG0062100
HORVU.MOREX.r2.1HG0062240
HORVU.MOREX.r2.1HG0062350
HORVU.MOREX.r2.1HG0062430
HORVU.MOREX.r2.1HG0062770
HORVU.MOREX.r2.1HG0062850
HORVU.MOREX.r2.1HG0063090
HORVU.MOREX.r2.1HG0063120
HORVU.MOREX.r2.1HG0063130
HORVU.MOREX.r2.1HG0063170
HORVU.MOREX.r2.1HG0063230
HORVU.MOREX.r2.1HG0063490
HORVU.MOREX.r2.1HG0063570
HORVU.MOREX.r2.1HG0064170
HORVU.MOREX.r2.1HG0064380
HORVU.MOREX.r2.1HG0064390
HORVU.MOREX.r2.1HG0064410
HORVU.MOREX.r2.1HG0064460
HORVU.MOREX.r2.1HG0064540
HORVU.MOREX.r2.1HG0064910
HORVU.MOREX.r2.1HG0064930
HORVU.MOREX.r2.1HG0065170
HORVU.MOREX.r2.1HG0065200
HORVU.MOREX.r2.1HG0065470
HORVU.MOREX.r2.1HG0065510
HORVU.MOREX.r2.1HG0065680
HORVU.MOREX.r2.1HG0065700
HORVU.MOREX.r2.1HG0065860
HORVU.MOREX.r2.1HG0065920
HORVU.MOREX.r2.1HG0066090
HORVU.MOREX.r2.1HG0066370
HORVU.MOREX.r2.1HG0066390
HORVU.MOREX.r2.1HG0066980
HORVU.MOREX.r2.1HG0067040
HORVU.MOREX.r2.1HG0067500
HORVU.MOREX.r2.1HG0067510
HORVU.MOREX.r2.1HG0067660
HORVU.MOREX.r2.1HG0067770
HORVU.MOREX.r2.1HG0068540
HORVU.MOREX.r2.1HG0068720
HORVU.MOREX.r2.1HG0068730
HORVU.MOREX.r2.1HG0069010
HORVU.MOREX.r2.1HG0069030
HORVU.MOREX.r2.1HG0069410
HORVU.MOREX.r2.1HG0069480
HORVU.MOREX.r2.1HG0069590
HORVU.MOREX.r2.1HG0069830
HORVU.MOREX.r2.1HG0070690
HORVU.MOREX.r2.1HG0071160
HORVU.MOREX.r2.1HG0071210
HORVU.MOREX.r2.1HG0071820
HORVU.MOREX.r2.1HG0071970
HORVU.MOREX.r2.1HG0072300
HORVU.MOREX.r2.1HG0073100
HORVU.MOREX.r2.1HG0073300
HORVU.MOREX.r2.1HG0073390
HORVU.MOREX.r2.1HG0073430
HORVU.MOREX.r2.1HG0073630
HORVU.MOREX.r2.1HG0073990
HORVU.MOREX.r2.1HG0074020
HORVU.MOREX.r2.1HG0074340
HORVU.MOREX.r2.1HG0074420
HORVU.MOREX.r2.1HG0074590
HORVU.MOREX.r2.1HG0074660
HORVU.MOREX.r2.1HG0074850
HORVU.MOREX.r2.1HG0074920
HORVU.MOREX.r2.1HG0075070
HORVU.MOREX.r2.1HG0075130
HORVU.MOREX.r2.1HG0075200
HORVU.MOREX.r2.1HG0075780
HORVU.MOREX.r2.1HG0075820
HORVU.MOREX.r2.1HG0075910
HORVU.MOREX.r2.1HG0076090
HORVU.MOREX.r2.1HG0076570
HORVU.MOREX.r2.1HG0076670
HORVU.MOREX.r2.1HG0076680
HORVU.MOREX.r2.1HG0077180
HORVU.MOREX.r2.1HG0077230
HORVU.MOREX.r2.1HG0077280
HORVU.MOREX.r2.1HG0077340
HORVU.MOREX.r2.1HG0077400
HORVU.MOREX.r2.1HG0077430
HORVU.MOREX.r2.1HG0077870
HORVU.MOREX.r2.1HG0078090
HORVU.MOREX.r2.1HG0078210
HORVU.MOREX.r2.1HG0078220
HORVU.MOREX.r2.1HG0078230
HORVU.MOREX.r2.1HG0078310
HORVU.MOREX.r2.1HG0078320
HORVU.MOREX.r2.1HG0078340
HORVU.MOREX.r2.1HG0078350
HORVU.MOREX.r2.1HG0078390
HORVU.MOREX.r2.1HG0078560
HORVU.MOREX.r2.1HG0078570
HORVU.MOREX.r2.1HG0078610
HORVU.MOREX.r2.1HG0078630
HORVU.MOREX.r2.1HG0078740
HORVU.MOREX.r2.2HG0078890
HORVU.MOREX.r2.2HG0079060
HORVU.MOREX.r2.2HG0079230
HORVU.MOREX.r2.2HG0079560
HORVU.MOREX.r2.2HG0079630
HORVU.MOREX.r2.2HG0079820
HORVU.MOREX.r2.2HG0080000
HORVU.MOREX.r2.2HG0080040
HORVU.MOREX.r2.2HG0080150
HORVU.MOREX.r2.2HG0080240
HORVU.MOREX.r2.2HG0080730
HORVU.MOREX.r2.2HG0081260
HORVU.MOREX.r2.2HG0081520
HORVU.MOREX.r2.2HG0081760
HORVU.MOREX.r2.2HG0081770
HORVU.MOREX.r2.2HG0081780
HORVU.MOREX.r2.2HG0082200
HORVU.MOREX.r2.2HG0082400
HORVU.MOREX.r2.2HG0082620
HORVU.MOREX.r2.2HG0082790
HORVU.MOREX.r2.2HG0083110
HORVU.MOREX.r2.2HG0083180
HORVU.MOREX.r2.2HG0083460
HORVU.MOREX.r2.2HG0083490
HORVU.MOREX.r2.2HG0083500
HORVU.MOREX.r2.2HG0083880
HORVU.MOREX.r2.2HG0084400
HORVU.MOREX.r2.2HG0084440
HORVU.MOREX.r2.2HG0084620
HORVU.MOREX.r2.2HG0085540
HORVU.MOREX.r2.2HG0085830
HORVU.MOREX.r2.2HG0085840
HORVU.MOREX.r2.2HG0085880
HORVU.MOREX.r2.2HG0085890
HORVU.MOREX.r2.2HG0085900
HORVU.MOREX.r2.2HG0085910
HORVU.MOREX.r2.2HG0085920
HORVU.MOREX.r2.2HG0085990
HORVU.MOREX.r2.2HG0086410
HORVU.MOREX.r2.2HG0086560
HORVU.MOREX.r2.2HG0087210
HORVU.MOREX.r2.2HG0087370
HORVU.MOREX.r2.2HG0088000
HORVU.MOREX.r2.2HG0088180
HORVU.MOREX.r2.2HG0088330
HORVU.MOREX.r2.2HG0088660
HORVU.MOREX.r2.2HG0089210
HORVU.MOREX.r2.2HG0089240
HORVU.MOREX.r2.2HG0089330
HORVU.MOREX.r2.2HG0089710
HORVU.MOREX.r2.2HG0089740
HORVU.MOREX.r2.2HG0090020
HORVU.MOREX.r2.2HG0091190
HORVU.MOREX.r2.2HG0091470
HORVU.MOREX.r2.2HG0091770
HORVU.MOREX.r2.2HG0091800
HORVU.MOREX.r2.2HG0092100
HORVU.MOREX.r2.2HG0092980
HORVU.MOREX.r2.2HG0093360
HORVU.MOREX.r2.2HG0093470
HORVU.MOREX.r2.2HG0093570
HORVU.MOREX.r2.2HG0093580
HORVU.MOREX.r2.2HG0093910
HORVU.MOREX.r2.2HG0093960
HORVU.MOREX.r2.2HG0094250
HORVU.MOREX.r2.2HG0094260
HORVU.MOREX.r2.2HG0094340
HORVU.MOREX.r2.2HG0094490
HORVU.MOREX.r2.2HG0095170
HORVU.MOREX.r2.2HG0095180
HORVU.MOREX.r2.2HG0095190
HORVU.MOREX.r2.2HG0095380
HORVU.MOREX.r2.2HG0095480
HORVU.MOREX.r2.2HG0095580
HORVU.MOREX.r2.2HG0095650
HORVU.MOREX.r2.2HG0095680
HORVU.MOREX.r2.2HG0095690
HORVU.MOREX.r2.2HG0095820
HORVU.MOREX.r2.2HG0095910
HORVU.MOREX.r2.2HG0096310
HORVU.MOREX.r2.2HG0096400
HORVU.MOREX.r2.2HG0096600
HORVU.MOREX.r2.2HG0097190
HORVU.MOREX.r2.2HG0097490
HORVU.MOREX.r2.2HG0097590
HORVU.MOREX.r2.2HG0097680
HORVU.MOREX.r2.2HG0097920
HORVU.MOREX.r2.2HG0098140
HORVU.MOREX.r2.2HG0098230
HORVU.MOREX.r2.2HG0098330
HORVU.MOREX.r2.2HG0098350
HORVU.MOREX.r2.2HG0098610
HORVU.MOREX.r2.2HG0098660
HORVU.MOREX.r2.2HG0099010
HORVU.MOREX.r2.2HG0099720
HORVU.MOREX.r2.2HG0099730
HORVU.MOREX.r2.2HG0099840
HORVU.MOREX.r2.2HG0099970
HORVU.MOREX.r2.2HG0100170
HORVU.MOREX.r2.2HG0100250
HORVU.MOREX.r2.2HG0100310
HORVU.MOREX.r2.2HG0100380
HORVU.MOREX.r2.2HG0100580
HORVU.MOREX.r2.2HG0100610
HORVU.MOREX.r2.2HG0100790
HORVU.MOREX.r2.2HG0100900
HORVU.MOREX.r2.2HG0100940
HORVU.MOREX.r2.2HG0100960
HORVU.MOREX.r2.2HG0102010
HORVU.MOREX.r2.2HG0102130
HORVU.MOREX.r2.2HG0102180
HORVU.MOREX.r2.2HG0102190
HORVU.MOREX.r2.2HG0102260
HORVU.MOREX.r2.2HG0102520
HORVU.MOREX.r2.2HG0102980
HORVU.MOREX.r2.2HG0103090
HORVU.MOREX.r2.2HG0103440
HORVU.MOREX.r2.2HG0103530
HORVU.MOREX.r2.2HG0104220
HORVU.MOREX.r2.2HG0104300
HORVU.MOREX.r2.2HG0104620
HORVU.MOREX.r2.2HG0104900
HORVU.MOREX.r2.2HG0104910
HORVU.MOREX.r2.2HG0105320
HORVU.MOREX.r2.2HG0105470
HORVU.MOREX.r2.2HG0105480
HORVU.MOREX.r2.2HG0105540
HORVU.MOREX.r2.2HG0106140
HORVU.MOREX.r2.2HG0107040
HORVU.MOREX.r2.2HG0107100
HORVU.MOREX.r2.2HG0107450
HORVU.MOREX.r2.2HG0107550
HORVU.MOREX.r2.2HG0107630
HORVU.MOREX.r2.2HG0107740
HORVU.MOREX.r2.2HG0107970
HORVU.MOREX.r2.2HG0108310
HORVU.MOREX.r2.2HG0108340
HORVU.MOREX.r2.2HG0108430
HORVU.MOREX.r2.2HG0109030
HORVU.MOREX.r2.2HG0109090
HORVU.MOREX.r2.2HG0109310
HORVU.MOREX.r2.2HG0109460
HORVU.MOREX.r2.2HG0109550
HORVU.MOREX.r2.2HG0109620
HORVU.MOREX.r2.2HG0109710
HORVU.MOREX.r2.2HG0109780
HORVU.MOREX.r2.2HG0110070
HORVU.MOREX.r2.2HG0110160
HORVU.MOREX.r2.2HG0110310
HORVU.MOREX.r2.2HG0110620
HORVU.MOREX.r2.2HG0110800
HORVU.MOREX.r2.2HG0110930
HORVU.MOREX.r2.2HG0111000
HORVU.MOREX.r2.2HG0111060
HORVU.MOREX.r2.2HG0111730
HORVU.MOREX.r2.2HG0111890
HORVU.MOREX.r2.2HG0111900
HORVU.MOREX.r2.2HG0111920
HORVU.MOREX.r2.2HG0111930
HORVU.MOREX.r2.2HG0112150
HORVU.MOREX.r2.2HG0112310
HORVU.MOREX.r2.2HG0112480
HORVU.MOREX.r2.2HG0112510
HORVU.MOREX.r2.2HG0112970
HORVU.MOREX.r2.2HG0113300
HORVU.MOREX.r2.2HG0113830
HORVU.MOREX.r2.2HG0113880
HORVU.MOREX.r2.2HG0113930
HORVU.MOREX.r2.2HG0114190
HORVU.MOREX.r2.2HG0114730
HORVU.MOREX.r2.2HG0114750
HORVU.MOREX.r2.2HG0114770
HORVU.MOREX.r2.2HG0114780
HORVU.MOREX.r2.2HG0114790
HORVU.MOREX.r2.2HG0115110
HORVU.MOREX.r2.2HG0115120
HORVU.MOREX.r2.2HG0115300
HORVU.MOREX.r2.2HG0115310
HORVU.MOREX.r2.2HG0115410
HORVU.MOREX.r2.2HG0115460
HORVU.MOREX.r2.2HG0115550
HORVU.MOREX.r2.2HG0115600
HORVU.MOREX.r2.2HG0115680
HORVU.MOREX.r2.2HG0116450
HORVU.MOREX.r2.2HG0116600
HORVU.MOREX.r2.2HG0116760
HORVU.MOREX.r2.2HG0117060
HORVU.MOREX.r2.2HG0117130
HORVU.MOREX.r2.2HG0117370
HORVU.MOREX.r2.2HG0117400
HORVU.MOREX.r2.2HG0117500
HORVU.MOREX.r2.2HG0117750
HORVU.MOREX.r2.2HG0118360
HORVU.MOREX.r2.2HG0118370
HORVU.MOREX.r2.2HG0118680
HORVU.MOREX.r2.2HG0118730
HORVU.MOREX.r2.2HG0118810
HORVU.MOREX.r2.2HG0118970
HORVU.MOREX.r2.2HG0119160
HORVU.MOREX.r2.2HG0119220
HORVU.MOREX.r2.2HG0119380
HORVU.MOREX.r2.2HG0119520
HORVU.MOREX.r2.2HG0119620
HORVU.MOREX.r2.2HG0119630
HORVU.MOREX.r2.2HG0119800
HORVU.MOREX.r2.2HG0119820
HORVU.MOREX.r2.2HG0119970
HORVU.MOREX.r2.2HG0119990
HORVU.MOREX.r2.2HG0120240
HORVU.MOREX.r2.2HG0120380
HORVU.MOREX.r2.2HG0120510
HORVU.MOREX.r2.2HG0120560
HORVU.MOREX.r2.2HG0120600
HORVU.MOREX.r2.2HG0120740
HORVU.MOREX.r2.2HG0121050
HORVU.MOREX.r2.2HG0121200
HORVU.MOREX.r2.2HG0121490
HORVU.MOREX.r2.2HG0121570
HORVU.MOREX.r2.2HG0121590
HORVU.MOREX.r2.2HG0121930
HORVU.MOREX.r2.2HG0121950
HORVU.MOREX.r2.2HG0122340
HORVU.MOREX.r2.2HG0122610
HORVU.MOREX.r2.2HG0122620
HORVU.MOREX.r2.2HG0123040
HORVU.MOREX.r2.2HG0123500
HORVU.MOREX.r2.2HG0123590
HORVU.MOREX.r2.2HG0123740
HORVU.MOREX.r2.2HG0124820
HORVU.MOREX.r2.2HG0125150
HORVU.MOREX.r2.2HG0125170
HORVU.MOREX.r2.2HG0125210
HORVU.MOREX.r2.2HG0125390
HORVU.MOREX.r2.2HG0125530
HORVU.MOREX.r2.2HG0126140
HORVU.MOREX.r2.2HG0126150
HORVU.MOREX.r2.2HG0126160
HORVU.MOREX.r2.2HG0126270
HORVU.MOREX.r2.2HG0126590
HORVU.MOREX.r2.2HG0126790
HORVU.MOREX.r2.2HG0126800
HORVU.MOREX.r2.2HG0126990
HORVU.MOREX.r2.2HG0127140
HORVU.MOREX.r2.2HG0127180
HORVU.MOREX.r2.2HG0127360
HORVU.MOREX.r2.2HG0127410
HORVU.MOREX.r2.2HG0127460
HORVU.MOREX.r2.2HG0128610
HORVU.MOREX.r2.2HG0128650
HORVU.MOREX.r2.2HG0129420
HORVU.MOREX.r2.2HG0129530
HORVU.MOREX.r2.2HG0129610
HORVU.MOREX.r2.2HG0129810
HORVU.MOREX.r2.2HG0129820
HORVU.MOREX.r2.2HG0129850
HORVU.MOREX.r2.2HG0129900
HORVU.MOREX.r2.2HG0129920
HORVU.MOREX.r2.2HG0129950
HORVU.MOREX.r2.2HG0130400
HORVU.MOREX.r2.2HG0130470
HORVU.MOREX.r2.2HG0130620
HORVU.MOREX.r2.2HG0130740
HORVU.MOREX.r2.2HG0130820
HORVU.MOREX.r2.2HG0130920
HORVU.MOREX.r2.2HG0131180
HORVU.MOREX.r2.2HG0131510
HORVU.MOREX.r2.2HG0131710
HORVU.MOREX.r2.2HG0132390
HORVU.MOREX.r2.2HG0132480
HORVU.MOREX.r2.2HG0132690
HORVU.MOREX.r2.2HG0132760
HORVU.MOREX.r2.2HG0133090
HORVU.MOREX.r2.2HG0133110
HORVU.MOREX.r2.2HG0133120
HORVU.MOREX.r2.2HG0133140
HORVU.MOREX.r2.2HG0133650
HORVU.MOREX.r2.2HG0133660
HORVU.MOREX.r2.2HG0133980
HORVU.MOREX.r2.2HG0134330
HORVU.MOREX.r2.2HG0134380
HORVU.MOREX.r2.2HG0134730
HORVU.MOREX.r2.2HG0135060
HORVU.MOREX.r2.2HG0135270
HORVU.MOREX.r2.2HG0135400
HORVU.MOREX.r2.2HG0135500
HORVU.MOREX.r2.2HG0135570
HORVU.MOREX.r2.2HG0135600
HORVU.MOREX.r2.2HG0135710
HORVU.MOREX.r2.2HG0135740
HORVU.MOREX.r2.2HG0135900
HORVU.MOREX.r2.2HG0136660
HORVU.MOREX.r2.2HG0136690
HORVU.MOREX.r2.2HG0136700
HORVU.MOREX.r2.2HG0136710
HORVU.MOREX.r2.2HG0136770
HORVU.MOREX.r2.2HG0137060
HORVU.MOREX.r2.2HG0137450
HORVU.MOREX.r2.2HG0137550
HORVU.MOREX.r2.2HG0137750
HORVU.MOREX.r2.2HG0137760
HORVU.MOREX.r2.2HG0137830
HORVU.MOREX.r2.2HG0138050
HORVU.MOREX.r2.2HG0138220
HORVU.MOREX.r2.2HG0138650
HORVU.MOREX.r2.2HG0138790
HORVU.MOREX.r2.2HG0138800
HORVU.MOREX.r2.2HG0139240
HORVU.MOREX.r2.2HG0139320
HORVU.MOREX.r2.2HG0139490
HORVU.MOREX.r2.2HG0139710
HORVU.MOREX.r2.2HG0139720
HORVU.MOREX.r2.2HG0139820
HORVU.MOREX.r2.2HG0140140
HORVU.MOREX.r2.2HG0140300
HORVU.MOREX.r2.2HG0140330
HORVU.MOREX.r2.2HG0140390
HORVU.MOREX.r2.2HG0140580
HORVU.MOREX.r2.2HG0140590
HORVU.MOREX.r2.2HG0140640
HORVU.MOREX.r2.2HG0140830
HORVU.MOREX.r2.2HG0141110
HORVU.MOREX.r2.2HG0141280
HORVU.MOREX.r2.2HG0141290
HORVU.MOREX.r2.2HG0141500
HORVU.MOREX.r2.2HG0141580
HORVU.MOREX.r2.2HG0141660
HORVU.MOREX.r2.2HG0141770
HORVU.MOREX.r2.2HG0141850
HORVU.MOREX.r2.2HG0141970
HORVU.MOREX.r2.2HG0142180
HORVU.MOREX.r2.2HG0142200
HORVU.MOREX.r2.2HG0142250
HORVU.MOREX.r2.2HG0142260
HORVU.MOREX.r2.2HG0142430
HORVU.MOREX.r2.2HG0142490
HORVU.MOREX.r2.2HG0142570
HORVU.MOREX.r2.2HG0142810
HORVU.MOREX.r2.2HG0143070
HORVU.MOREX.r2.2HG0143570
HORVU.MOREX.r2.2HG0143840
HORVU.MOREX.r2.2HG0143850
HORVU.MOREX.r2.2HG0143940
HORVU.MOREX.r2.2HG0144270
HORVU.MOREX.r2.2HG0144280
HORVU.MOREX.r2.2HG0145470
HORVU.MOREX.r2.2HG0145950
HORVU.MOREX.r2.2HG0146030
HORVU.MOREX.r2.2HG0146160
HORVU.MOREX.r2.2HG0146290
HORVU.MOREX.r2.2HG0146380
HORVU.MOREX.r2.2HG0146390
HORVU.MOREX.r2.2HG0146410
HORVU.MOREX.r2.2HG0146500
HORVU.MOREX.r2.2HG0146600
HORVU.MOREX.r2.2HG0146710
HORVU.MOREX.r2.2HG0146840
HORVU.MOREX.r2.2HG0146860
HORVU.MOREX.r2.2HG0146870
HORVU.MOREX.r2.2HG0146920
HORVU.MOREX.r2.2HG0146940
HORVU.MOREX.r2.2HG0147110
HORVU.MOREX.r2.2HG0147120
HORVU.MOREX.r2.2HG0147200
HORVU.MOREX.r2.2HG0147490
HORVU.MOREX.r2.2HG0147600
HORVU.MOREX.r2.2HG0147820
HORVU.MOREX.r2.2HG0147840
HORVU.MOREX.r2.2HG0147890
HORVU.MOREX.r2.2HG0148200
HORVU.MOREX.r2.2HG0148210
HORVU.MOREX.r2.2HG0148240
HORVU.MOREX.r2.2HG0148270
HORVU.MOREX.r2.2HG0148360
HORVU.MOREX.r2.2HG0148760
HORVU.MOREX.r2.2HG0148980
HORVU.MOREX.r2.2HG0149080
HORVU.MOREX.r2.2HG0149140
HORVU.MOREX.r2.2HG0150080
HORVU.MOREX.r2.2HG0150390
HORVU.MOREX.r2.2HG0150460
HORVU.MOREX.r2.2HG0150880
HORVU.MOREX.r2.2HG0150900
HORVU.MOREX.r2.2HG0150920
HORVU.MOREX.r2.2HG0150950
HORVU.MOREX.r2.2HG0150990
HORVU.MOREX.r2.2HG0151630
HORVU.MOREX.r2.2HG0151650
HORVU.MOREX.r2.2HG0151670
HORVU.MOREX.r2.2HG0151760
HORVU.MOREX.r2.2HG0151870
HORVU.MOREX.r2.2HG0152000
HORVU.MOREX.r2.2HG0152110
HORVU.MOREX.r2.2HG0152180
HORVU.MOREX.r2.2HG0152240
HORVU.MOREX.r2.2HG0152360
HORVU.MOREX.r2.2HG0152410
HORVU.MOREX.r2.2HG0152520
HORVU.MOREX.r2.2HG0152600
HORVU.MOREX.r2.2HG0153190
HORVU.MOREX.r2.2HG0153250
HORVU.MOREX.r2.2HG0153280
HORVU.MOREX.r2.2HG0153430
HORVU.MOREX.r2.2HG0153740
HORVU.MOREX.r2.2HG0153760
HORVU.MOREX.r2.2HG0153920
HORVU.MOREX.r2.2HG0154090
HORVU.MOREX.r2.2HG0154180
HORVU.MOREX.r2.2HG0154190
HORVU.MOREX.r2.2HG0154290
HORVU.MOREX.r2.2HG0154470
HORVU.MOREX.r2.2HG0154630
HORVU.MOREX.r2.2HG0155300
HORVU.MOREX.r2.2HG0155330
HORVU.MOREX.r2.2HG0155660
HORVU.MOREX.r2.2HG0155750
HORVU.MOREX.r2.2HG0156010
HORVU.MOREX.r2.2HG0156220
HORVU.MOREX.r2.2HG0156240
HORVU.MOREX.r2.2HG0156420
HORVU.MOREX.r2.2HG0156440
HORVU.MOREX.r2.2HG0156850
HORVU.MOREX.r2.2HG0157240
HORVU.MOREX.r2.2HG0157630
HORVU.MOREX.r2.2HG0157640
HORVU.MOREX.r2.2HG0157760
HORVU.MOREX.r2.2HG0158110
HORVU.MOREX.r2.2HG0158140
HORVU.MOREX.r2.2HG0158240
HORVU.MOREX.r2.2HG0158320
HORVU.MOREX.r2.2HG0158430
HORVU.MOREX.r2.2HG0158460
HORVU.MOREX.r2.2HG0158520
HORVU.MOREX.r2.2HG0158580
HORVU.MOREX.r2.2HG0158800
HORVU.MOREX.r2.2HG0158860
HORVU.MOREX.r2.2HG0159140
HORVU.MOREX.r2.2HG0159420
HORVU.MOREX.r2.2HG0159490
HORVU.MOREX.r2.2HG0159500
HORVU.MOREX.r2.2HG0159510
HORVU.MOREX.r2.2HG0159530
HORVU.MOREX.r2.2HG0159730
HORVU.MOREX.r2.2HG0159960
HORVU.MOREX.r2.2HG0160000
HORVU.MOREX.r2.2HG0160030
HORVU.MOREX.r2.2HG0160070
HORVU.MOREX.r2.2HG0160360
HORVU.MOREX.r2.2HG0160400
HORVU.MOREX.r2.2HG0160430
HORVU.MOREX.r2.2HG0160460
HORVU.MOREX.r2.2HG0160570
HORVU.MOREX.r2.2HG0160660
HORVU.MOREX.r2.2HG0160690
HORVU.MOREX.r2.2HG0160710
HORVU.MOREX.r2.2HG0161080
HORVU.MOREX.r2.2HG0161150
HORVU.MOREX.r2.2HG0161370
HORVU.MOREX.r2.2HG0161480
HORVU.MOREX.r2.2HG0161610
HORVU.MOREX.r2.2HG0161790
HORVU.MOREX.r2.2HG0161940
HORVU.MOREX.r2.2HG0161970
HORVU.MOREX.r2.2HG0162060
HORVU.MOREX.r2.2HG0162210
HORVU.MOREX.r2.2HG0162310
HORVU.MOREX.r2.2HG0162600
HORVU.MOREX.r2.2HG0162760
HORVU.MOREX.r2.2HG0162780
HORVU.MOREX.r2.2HG0163110
HORVU.MOREX.r2.2HG0163220
HORVU.MOREX.r2.2HG0163470
HORVU.MOREX.r2.2HG0163480
HORVU.MOREX.r2.2HG0163490
HORVU.MOREX.r2.2HG0163840
HORVU.MOREX.r2.2HG0163910
HORVU.MOREX.r2.2HG0163940
HORVU.MOREX.r2.2HG0164160
HORVU.MOREX.r2.2HG0164340
HORVU.MOREX.r2.2HG0164360
HORVU.MOREX.r2.2HG0164520
HORVU.MOREX.r2.2HG0164620
HORVU.MOREX.r2.2HG0164770
HORVU.MOREX.r2.2HG0164830
HORVU.MOREX.r2.2HG0164860
HORVU.MOREX.r2.2HG0164880
HORVU.MOREX.r2.2HG0165330
HORVU.MOREX.r2.2HG0165420
HORVU.MOREX.r2.2HG0165650
HORVU.MOREX.r2.2HG0166600
HORVU.MOREX.r2.2HG0166800
HORVU.MOREX.r2.2HG0167340
HORVU.MOREX.r2.2HG0167500
HORVU.MOREX.r2.2HG0167650
HORVU.MOREX.r2.2HG0167660
HORVU.MOREX.r2.2HG0167920
HORVU.MOREX.r2.2HG0168040
HORVU.MOREX.r2.2HG0168100
HORVU.MOREX.r2.2HG0168160
HORVU.MOREX.r2.2HG0168280
HORVU.MOREX.r2.2HG0168290
HORVU.MOREX.r2.2HG0168950
HORVU.MOREX.r2.2HG0168960
HORVU.MOREX.r2.2HG0169140
HORVU.MOREX.r2.2HG0169710
HORVU.MOREX.r2.2HG0169780
HORVU.MOREX.r2.2HG0169820
HORVU.MOREX.r2.2HG0169870
HORVU.MOREX.r2.2HG0170070
HORVU.MOREX.r2.2HG0170150
HORVU.MOREX.r2.2HG0170290
HORVU.MOREX.r2.2HG0170300
HORVU.MOREX.r2.2HG0170410
HORVU.MOREX.r2.2HG0170530
HORVU.MOREX.r2.2HG0170680
HORVU.MOREX.r2.2HG0170740
HORVU.MOREX.r2.2HG0170930
HORVU.MOREX.r2.2HG0171020
HORVU.MOREX.r2.2HG0171180
HORVU.MOREX.r2.2HG0171250
HORVU.MOREX.r2.2HG0171840
HORVU.MOREX.r2.2HG0171850
HORVU.MOREX.r2.2HG0172050
HORVU.MOREX.r2.2HG0172380
HORVU.MOREX.r2.2HG0172510
HORVU.MOREX.r2.2HG0172580
HORVU.MOREX.r2.2HG0172720
HORVU.MOREX.r2.2HG0173180
HORVU.MOREX.r2.2HG0173210
HORVU.MOREX.r2.2HG0173240
HORVU.MOREX.r2.2HG0173490
HORVU.MOREX.r2.2HG0173500
HORVU.MOREX.r2.2HG0173510
HORVU.MOREX.r2.2HG0173560
HORVU.MOREX.r2.2HG0173640
HORVU.MOREX.r2.2HG0173660
HORVU.MOREX.r2.2HG0173750
HORVU.MOREX.r2.2HG0173830
HORVU.MOREX.r2.2HG0173860
HORVU.MOREX.r2.2HG0173900
HORVU.MOREX.r2.2HG0174110
HORVU.MOREX.r2.2HG0174280
HORVU.MOREX.r2.2HG0174290
HORVU.MOREX.r2.2HG0174490
HORVU.MOREX.r2.2HG0174690
HORVU.MOREX.r2.2HG0174920
HORVU.MOREX.r2.2HG0175170
HORVU.MOREX.r2.2HG0175180
HORVU.MOREX.r2.2HG0175270
HORVU.MOREX.r2.2HG0175360
HORVU.MOREX.r2.2HG0175580
HORVU.MOREX.r2.2HG0176150
HORVU.MOREX.r2.2HG0176800
HORVU.MOREX.r2.2HG0176980
HORVU.MOREX.r2.2HG0176990
HORVU.MOREX.r2.2HG0177050
HORVU.MOREX.r2.2HG0177120
HORVU.MOREX.r2.2HG0177180
HORVU.MOREX.r2.2HG0177260
HORVU.MOREX.r2.2HG0177270
HORVU.MOREX.r2.2HG0177570
HORVU.MOREX.r2.2HG0177580
HORVU.MOREX.r2.2HG0177670
HORVU.MOREX.r2.2HG0177750
HORVU.MOREX.r2.2HG0177900
HORVU.MOREX.r2.2HG0177970
HORVU.MOREX.r2.2HG0178130
HORVU.MOREX.r2.2HG0178250
HORVU.MOREX.r2.2HG0178320
HORVU.MOREX.r2.2HG0178540
HORVU.MOREX.r2.2HG0178650
HORVU.MOREX.r2.2HG0178690
HORVU.MOREX.r2.2HG0178810
HORVU.MOREX.r2.2HG0178860
HORVU.MOREX.r2.2HG0179680
HORVU.MOREX.r2.2HG0179990
HORVU.MOREX.r2.2HG0180710
HORVU.MOREX.r2.2HG0180730
HORVU.MOREX.r2.2HG0181100
HORVU.MOREX.r2.2HG0181330
HORVU.MOREX.r2.2HG0181340
HORVU.MOREX.r2.2HG0078830
HORVU.MOREX.r2.2HG0079070
HORVU.MOREX.r2.2HG0079220
HORVU.MOREX.r2.2HG0080020
HORVU.MOREX.r2.2HG0080630
HORVU.MOREX.r2.2HG0080640
HORVU.MOREX.r2.2HG0081070
HORVU.MOREX.r2.2HG0081080
HORVU.MOREX.r2.2HG0081460
HORVU.MOREX.r2.2HG0082120
HORVU.MOREX.r2.2HG0082480
HORVU.MOREX.r2.2HG0082600
HORVU.MOREX.r2.2HG0082710
HORVU.MOREX.r2.2HG0082780
HORVU.MOREX.r2.2HG0083220
HORVU.MOREX.r2.2HG0083310
HORVU.MOREX.r2.2HG0083610
HORVU.MOREX.r2.2HG0083690
HORVU.MOREX.r2.2HG0083720
HORVU.MOREX.r2.2HG0084180
HORVU.MOREX.r2.2HG0084340
HORVU.MOREX.r2.2HG0084600
HORVU.MOREX.r2.2HG0085360
HORVU.MOREX.r2.2HG0085530
HORVU.MOREX.r2.2HG0085770
HORVU.MOREX.r2.2HG0086330
HORVU.MOREX.r2.2HG0086880
HORVU.MOREX.r2.2HG0087510
HORVU.MOREX.r2.2HG0087850
HORVU.MOREX.r2.2HG0087990
HORVU.MOREX.r2.2HG0088280
HORVU.MOREX.r2.2HG0088380
HORVU.MOREX.r2.2HG0088390
HORVU.MOREX.r2.2HG0088580
HORVU.MOREX.r2.2HG0088650
HORVU.MOREX.r2.2HG0089130
HORVU.MOREX.r2.2HG0089280
HORVU.MOREX.r2.2HG0089430
HORVU.MOREX.r2.2HG0089440
HORVU.MOREX.r2.2HG0089450
HORVU.MOREX.r2.2HG0089560
HORVU.MOREX.r2.2HG0089850
HORVU.MOREX.r2.2HG0089930
HORVU.MOREX.r2.2HG0090180
HORVU.MOREX.r2.2HG0090370
HORVU.MOREX.r2.2HG0090390
HORVU.MOREX.r2.2HG0090400
HORVU.MOREX.r2.2HG0090500
HORVU.MOREX.r2.2HG0090620
HORVU.MOREX.r2.2HG0090640
HORVU.MOREX.r2.2HG0090910
HORVU.MOREX.r2.2HG0090920
HORVU.MOREX.r2.2HG0090930
HORVU.MOREX.r2.2HG0091100
HORVU.MOREX.r2.2HG0091120
HORVU.MOREX.r2.2HG0091160
HORVU.MOREX.r2.2HG0091170
HORVU.MOREX.r2.2HG0091320
HORVU.MOREX.r2.2HG0091330
HORVU.MOREX.r2.2HG0091410
HORVU.MOREX.r2.2HG0091480
HORVU.MOREX.r2.2HG0091490
HORVU.MOREX.r2.2HG0091560
HORVU.MOREX.r2.2HG0091570
HORVU.MOREX.r2.2HG0091760
HORVU.MOREX.r2.2HG0091780
HORVU.MOREX.r2.2HG0091790
HORVU.MOREX.r2.2HG0092070
HORVU.MOREX.r2.2HG0092810
HORVU.MOREX.r2.2HG0092970
HORVU.MOREX.r2.2HG0093030
HORVU.MOREX.r2.2HG0093110
HORVU.MOREX.r2.2HG0093170
HORVU.MOREX.r2.2HG0093250
HORVU.MOREX.r2.2HG0093260
HORVU.MOREX.r2.2HG0093680
HORVU.MOREX.r2.2HG0093860
HORVU.MOREX.r2.2HG0093890
HORVU.MOREX.r2.2HG0093980
HORVU.MOREX.r2.2HG0094020
HORVU.MOREX.r2.2HG0094240
HORVU.MOREX.r2.2HG0094380
HORVU.MOREX.r2.2HG0094670
HORVU.MOREX.r2.2HG0095260
HORVU.MOREX.r2.2HG0095990
HORVU.MOREX.r2.2HG0096190
HORVU.MOREX.r2.2HG0096410
HORVU.MOREX.r2.2HG0096440
HORVU.MOREX.r2.2HG0096580
HORVU.MOREX.r2.2HG0096830
HORVU.MOREX.r2.2HG0097130
HORVU.MOREX.r2.2HG0097170
HORVU.MOREX.r2.2HG0097670
HORVU.MOREX.r2.2HG0097850
HORVU.MOREX.r2.2HG0097860
HORVU.MOREX.r2.2HG0097870
HORVU.MOREX.r2.2HG0098020
HORVU.MOREX.r2.2HG0098180
HORVU.MOREX.r2.2HG0098530
HORVU.MOREX.r2.2HG0098650
HORVU.MOREX.r2.2HG0098800
HORVU.MOREX.r2.2HG0098990
HORVU.MOREX.r2.2HG0099370
HORVU.MOREX.r2.2HG0099640
HORVU.MOREX.r2.2HG0099830
HORVU.MOREX.r2.2HG0099880
HORVU.MOREX.r2.2HG0099960
HORVU.MOREX.r2.2HG0100430
HORVU.MOREX.r2.2HG0101410
HORVU.MOREX.r2.2HG0101490
HORVU.MOREX.r2.2HG0101780
HORVU.MOREX.r2.2HG0101900
HORVU.MOREX.r2.2HG0102000
HORVU.MOREX.r2.2HG0102110
HORVU.MOREX.r2.2HG0102120
HORVU.MOREX.r2.2HG0102250
HORVU.MOREX.r2.2HG0102300
HORVU.MOREX.r2.2HG0102340
HORVU.MOREX.r2.2HG0102670
HORVU.MOREX.r2.2HG0102680
HORVU.MOREX.r2.2HG0102740
HORVU.MOREX.r2.2HG0103080
HORVU.MOREX.r2.2HG0103160
HORVU.MOREX.r2.2HG0103170
HORVU.MOREX.r2.2HG0103190
HORVU.MOREX.r2.2HG0103210
HORVU.MOREX.r2.2HG0103230
HORVU.MOREX.r2.2HG0103320
HORVU.MOREX.r2.2HG0103770
HORVU.MOREX.r2.2HG0103780
HORVU.MOREX.r2.2HG0103840
HORVU.MOREX.r2.2HG0103850
HORVU.MOREX.r2.2HG0104050
HORVU.MOREX.r2.2HG0104120
HORVU.MOREX.r2.2HG0104140
HORVU.MOREX.r2.2HG0104170
HORVU.MOREX.r2.2HG0104180
HORVU.MOREX.r2.2HG0104720
HORVU.MOREX.r2.2HG0105000
HORVU.MOREX.r2.2HG0105620
HORVU.MOREX.r2.2HG0105750
HORVU.MOREX.r2.2HG0105790
HORVU.MOREX.r2.2HG0105990
HORVU.MOREX.r2.2HG0106030
HORVU.MOREX.r2.2HG0106530
HORVU.MOREX.r2.2HG0106960
HORVU.MOREX.r2.2HG0107310
HORVU.MOREX.r2.2HG0107710
HORVU.MOREX.r2.2HG0107720
HORVU.MOREX.r2.2HG0107860
HORVU.MOREX.r2.2HG0107980
HORVU.MOREX.r2.2HG0108040
HORVU.MOREX.r2.2HG0108050
HORVU.MOREX.r2.2HG0108210
HORVU.MOREX.r2.2HG0108250
HORVU.MOREX.r2.2HG0108290
HORVU.MOREX.r2.2HG0108480
HORVU.MOREX.r2.2HG0108630
HORVU.MOREX.r2.2HG0109140
HORVU.MOREX.r2.2HG0109450
HORVU.MOREX.r2.2HG0109520
HORVU.MOREX.r2.2HG0109910
HORVU.MOREX.r2.2HG0109940
HORVU.MOREX.r2.2HG0109970
HORVU.MOREX.r2.2HG0110020
HORVU.MOREX.r2.2HG0110170
HORVU.MOREX.r2.2HG0110560
HORVU.MOREX.r2.2HG0110770
HORVU.MOREX.r2.2HG0111080
HORVU.MOREX.r2.2HG0111680
HORVU.MOREX.r2.2HG0112140
HORVU.MOREX.r2.2HG0112670
HORVU.MOREX.r2.2HG0112820
HORVU.MOREX.r2.2HG0112890
HORVU.MOREX.r2.2HG0113270
HORVU.MOREX.r2.2HG0113370
HORVU.MOREX.r2.2HG0113620
HORVU.MOREX.r2.2HG0113660
HORVU.MOREX.r2.2HG0113820
HORVU.MOREX.r2.2HG0114000
HORVU.MOREX.r2.2HG0114100
HORVU.MOREX.r2.2HG0114120
HORVU.MOREX.r2.2HG0114300
HORVU.MOREX.r2.2HG0114340
HORVU.MOREX.r2.2HG0114490
HORVU.MOREX.r2.2HG0114510
HORVU.MOREX.r2.2HG0114760
HORVU.MOREX.r2.2HG0114920
HORVU.MOREX.r2.2HG0115160
HORVU.MOREX.r2.2HG0115290
HORVU.MOREX.r2.2HG0115400
HORVU.MOREX.r2.2HG0115610
HORVU.MOREX.r2.2HG0115620
HORVU.MOREX.r2.2HG0116120
HORVU.MOREX.r2.2HG0116130
HORVU.MOREX.r2.2HG0116230
HORVU.MOREX.r2.2HG0116240
HORVU.MOREX.r2.2HG0116460
HORVU.MOREX.r2.2HG0116490
HORVU.MOREX.r2.2HG0116830
HORVU.MOREX.r2.2HG0116950
HORVU.MOREX.r2.2HG0117360
HORVU.MOREX.r2.2HG0117980
HORVU.MOREX.r2.2HG0118040
HORVU.MOREX.r2.2HG0118120
HORVU.MOREX.r2.2HG0118210
HORVU.MOREX.r2.2HG0118240
HORVU.MOREX.r2.2HG0118640
HORVU.MOREX.r2.2HG0118720
HORVU.MOREX.r2.2HG0119140
HORVU.MOREX.r2.2HG0119300
HORVU.MOREX.r2.2HG0119400
HORVU.MOREX.r2.2HG0119460
HORVU.MOREX.r2.2HG0119500
HORVU.MOREX.r2.2HG0119870
HORVU.MOREX.r2.2HG0120020
HORVU.MOREX.r2.2HG0120110
HORVU.MOREX.r2.2HG0120150
HORVU.MOREX.r2.2HG0120290
HORVU.MOREX.r2.2HG0120460
HORVU.MOREX.r2.2HG0120660
HORVU.MOREX.r2.2HG0121010
HORVU.MOREX.r2.2HG0121040
HORVU.MOREX.r2.2HG0121120
HORVU.MOREX.r2.2HG0121150
HORVU.MOREX.r2.2HG0121370
HORVU.MOREX.r2.2HG0121680
HORVU.MOREX.r2.2HG0121910
HORVU.MOREX.r2.2HG0121940
HORVU.MOREX.r2.2HG0122080
HORVU.MOREX.r2.2HG0122670
HORVU.MOREX.r2.2HG0122970
HORVU.MOREX.r2.2HG0123260
HORVU.MOREX.r2.2HG0123490
HORVU.MOREX.r2.2HG0123630
HORVU.MOREX.r2.2HG0123730
HORVU.MOREX.r2.2HG0123780
HORVU.MOREX.r2.2HG0123920
HORVU.MOREX.r2.2HG0124160
HORVU.MOREX.r2.2HG0124700
HORVU.MOREX.r2.2HG0124950
HORVU.MOREX.r2.2HG0124960
HORVU.MOREX.r2.2HG0125080
HORVU.MOREX.r2.2HG0125100
HORVU.MOREX.r2.2HG0125160
HORVU.MOREX.r2.2HG0125340
HORVU.MOREX.r2.2HG0125480
HORVU.MOREX.r2.2HG0125570
HORVU.MOREX.r2.2HG0125790
HORVU.MOREX.r2.2HG0126260
HORVU.MOREX.r2.2HG0126290
HORVU.MOREX.r2.2HG0126520
HORVU.MOREX.r2.2HG0126780
HORVU.MOREX.r2.2HG0126830
HORVU.MOREX.r2.2HG0126870
HORVU.MOREX.r2.2HG0127070
HORVU.MOREX.r2.2HG0127290
HORVU.MOREX.r2.2HG0127470
HORVU.MOREX.r2.2HG0127850
HORVU.MOREX.r2.2HG0127860
HORVU.MOREX.r2.2HG0127870
HORVU.MOREX.r2.2HG0127960
HORVU.MOREX.r2.2HG0128140
HORVU.MOREX.r2.2HG0128190
HORVU.MOREX.r2.2HG0128230
HORVU.MOREX.r2.2HG0128410
HORVU.MOREX.r2.2HG0128740
HORVU.MOREX.r2.2HG0128750
HORVU.MOREX.r2.2HG0128780
HORVU.MOREX.r2.2HG0128840
HORVU.MOREX.r2.2HG0129020
HORVU.MOREX.r2.2HG0129130
HORVU.MOREX.r2.2HG0129320
HORVU.MOREX.r2.2HG0129340
HORVU.MOREX.r2.2HG0129570
HORVU.MOREX.r2.2HG0129890
HORVU.MOREX.r2.2HG0129910
HORVU.MOREX.r2.2HG0129940
HORVU.MOREX.r2.2HG0130330
HORVU.MOREX.r2.2HG0130360
HORVU.MOREX.r2.2HG0130390
HORVU.MOREX.r2.2HG0130440
HORVU.MOREX.r2.2HG0130560
HORVU.MOREX.r2.2HG0130640
HORVU.MOREX.r2.2HG0130700
HORVU.MOREX.r2.2HG0130730
HORVU.MOREX.r2.2HG0131160
HORVU.MOREX.r2.2HG0131220
HORVU.MOREX.r2.2HG0131300
HORVU.MOREX.r2.2HG0131340
HORVU.MOREX.r2.2HG0131460
HORVU.MOREX.r2.2HG0131600
HORVU.MOREX.r2.2HG0132080
HORVU.MOREX.r2.2HG0132530
HORVU.MOREX.r2.2HG0132540
HORVU.MOREX.r2.2HG0132830
HORVU.MOREX.r2.2HG0132970
HORVU.MOREX.r2.2HG0133070
HORVU.MOREX.r2.2HG0133130
HORVU.MOREX.r2.2HG0133160
HORVU.MOREX.r2.2HG0133410
HORVU.MOREX.r2.2HG0133640
HORVU.MOREX.r2.2HG0134320
HORVU.MOREX.r2.2HG0134340
HORVU.MOREX.r2.2HG0134390
HORVU.MOREX.r2.2HG0134690
HORVU.MOREX.r2.2HG0134700
HORVU.MOREX.r2.2HG0134900
HORVU.MOREX.r2.2HG0135080
HORVU.MOREX.r2.2HG0135160
HORVU.MOREX.r2.2HG0135370
HORVU.MOREX.r2.2HG0135430
HORVU.MOREX.r2.2HG0135730
HORVU.MOREX.r2.2HG0135800
HORVU.MOREX.r2.2HG0135830
HORVU.MOREX.r2.2HG0135960
HORVU.MOREX.r2.2HG0135970
HORVU.MOREX.r2.2HG0135980
HORVU.MOREX.r2.2HG0135990
HORVU.MOREX.r2.2HG0136270
HORVU.MOREX.r2.2HG0136390
HORVU.MOREX.r2.2HG0136630
HORVU.MOREX.r2.2HG0136680
HORVU.MOREX.r2.2HG0136730
HORVU.MOREX.r2.2HG0136760
HORVU.MOREX.r2.2HG0137440
HORVU.MOREX.r2.2HG0137610
HORVU.MOREX.r2.2HG0137990
HORVU.MOREX.r2.2HG0138190
HORVU.MOREX.r2.2HG0138580
HORVU.MOREX.r2.2HG0138590
HORVU.MOREX.r2.2HG0139230
HORVU.MOREX.r2.2HG0139310
HORVU.MOREX.r2.2HG0139460
HORVU.MOREX.r2.2HG0139480
HORVU.MOREX.r2.2HG0139580
HORVU.MOREX.r2.2HG0139810
HORVU.MOREX.r2.2HG0140110
HORVU.MOREX.r2.2HG0140130
HORVU.MOREX.r2.2HG0140160
HORVU.MOREX.r2.2HG0140170
HORVU.MOREX.r2.2HG0140320
HORVU.MOREX.r2.2HG0140540
HORVU.MOREX.r2.2HG0140680
HORVU.MOREX.r2.2HG0140730
HORVU.MOREX.r2.2HG0140880
HORVU.MOREX.r2.2HG0141050
HORVU.MOREX.r2.2HG0141210
HORVU.MOREX.r2.2HG0141230
HORVU.MOREX.r2.2HG0141710
HORVU.MOREX.r2.2HG0142030
HORVU.MOREX.r2.2HG0142550
HORVU.MOREX.r2.2HG0142580
HORVU.MOREX.r2.2HG0142800
HORVU.MOREX.r2.2HG0142970
HORVU.MOREX.r2.2HG0143210
HORVU.MOREX.r2.2HG0143910
HORVU.MOREX.r2.2HG0144040
HORVU.MOREX.r2.2HG0144300
HORVU.MOREX.r2.2HG0144310
HORVU.MOREX.r2.2HG0144330
HORVU.MOREX.r2.2HG0144360
HORVU.MOREX.r2.2HG0144400
HORVU.MOREX.r2.2HG0144840
HORVU.MOREX.r2.2HG0145100
HORVU.MOREX.r2.2HG0145180
HORVU.MOREX.r2.2HG0145540
HORVU.MOREX.r2.2HG0145870
HORVU.MOREX.r2.2HG0146020
HORVU.MOREX.r2.2HG0146130
HORVU.MOREX.r2.2HG0146240
HORVU.MOREX.r2.2HG0146270
HORVU.MOREX.r2.2HG0146280
HORVU.MOREX.r2.2HG0146420
HORVU.MOREX.r2.2HG0146590
HORVU.MOREX.r2.2HG0146700
HORVU.MOREX.r2.2HG0147570
HORVU.MOREX.r2.2HG0147680
HORVU.MOREX.r2.2HG0147690
HORVU.MOREX.r2.2HG0147700
HORVU.MOREX.r2.2HG0147720
HORVU.MOREX.r2.2HG0147760
HORVU.MOREX.r2.2HG0147830
HORVU.MOREX.r2.2HG0147900
HORVU.MOREX.r2.2HG0147930
HORVU.MOREX.r2.2HG0148260
HORVU.MOREX.r2.2HG0148350
HORVU.MOREX.r2.2HG0148950
HORVU.MOREX.r2.2HG0148970
HORVU.MOREX.r2.2HG0149070
HORVU.MOREX.r2.2HG0149150
HORVU.MOREX.r2.2HG0149430
HORVU.MOREX.r2.2HG0149850
HORVU.MOREX.r2.2HG0150090
HORVU.MOREX.r2.2HG0150130
HORVU.MOREX.r2.2HG0150150
HORVU.MOREX.r2.2HG0150420
HORVU.MOREX.r2.2HG0150450
HORVU.MOREX.r2.2HG0151140
HORVU.MOREX.r2.2HG0151750
HORVU.MOREX.r2.2HG0151780
HORVU.MOREX.r2.2HG0152030
HORVU.MOREX.r2.2HG0152080
HORVU.MOREX.r2.2HG0152090
HORVU.MOREX.r2.2HG0152100
HORVU.MOREX.r2.2HG0152440
HORVU.MOREX.r2.2HG0152450
HORVU.MOREX.r2.2HG0152460
HORVU.MOREX.r2.2HG0152650
HORVU.MOREX.r2.2HG0152860
HORVU.MOREX.r2.2HG0152960
HORVU.MOREX.r2.2HG0153060
HORVU.MOREX.r2.2HG0153420
HORVU.MOREX.r2.2HG0153510
HORVU.MOREX.r2.2HG0153580
HORVU.MOREX.r2.2HG0153610
HORVU.MOREX.r2.2HG0153640
HORVU.MOREX.r2.2HG0153690
HORVU.MOREX.r2.2HG0154240
HORVU.MOREX.r2.2HG0154340
HORVU.MOREX.r2.2HG0154350
HORVU.MOREX.r2.2HG0154460
HORVU.MOREX.r2.2HG0154530
HORVU.MOREX.r2.2HG0154620
HORVU.MOREX.r2.2HG0154850
HORVU.MOREX.r2.2HG0154950
HORVU.MOREX.r2.2HG0154960
HORVU.MOREX.r2.2HG0155250
HORVU.MOREX.r2.2HG0155460
HORVU.MOREX.r2.2HG0155590
HORVU.MOREX.r2.2HG0155740
HORVU.MOREX.r2.2HG0155850
HORVU.MOREX.r2.2HG0155890
HORVU.MOREX.r2.2HG0155940
HORVU.MOREX.r2.2HG0155950
HORVU.MOREX.r2.2HG0156170
HORVU.MOREX.r2.2HG0156230
HORVU.MOREX.r2.2HG0156400
HORVU.MOREX.r2.2HG0156640
HORVU.MOREX.r2.2HG0156810
HORVU.MOREX.r2.2HG0156840
HORVU.MOREX.r2.2HG0156990
HORVU.MOREX.r2.2HG0157150
HORVU.MOREX.r2.2HG0157230
HORVU.MOREX.r2.2HG0157380
HORVU.MOREX.r2.2HG0157440
HORVU.MOREX.r2.2HG0157870
HORVU.MOREX.r2.2HG0157940
HORVU.MOREX.r2.2HG0158020
HORVU.MOREX.r2.2HG0158290
HORVU.MOREX.r2.2HG0158450
HORVU.MOREX.r2.2HG0158550
HORVU.MOREX.r2.2HG0158950
HORVU.MOREX.r2.2HG0159830
HORVU.MOREX.r2.2HG0160060
HORVU.MOREX.r2.2HG0160350
HORVU.MOREX.r2.2HG0160640
HORVU.MOREX.r2.2HG0160650
HORVU.MOREX.r2.2HG0160780
HORVU.MOREX.r2.2HG0161090
HORVU.MOREX.r2.2HG0161120
HORVU.MOREX.r2.2HG0161230
HORVU.MOREX.r2.2HG0161350
HORVU.MOREX.r2.2HG0161530
HORVU.MOREX.r2.2HG0161640
HORVU.MOREX.r2.2HG0161850
HORVU.MOREX.r2.2HG0161880
HORVU.MOREX.r2.2HG0162050
HORVU.MOREX.r2.2HG0162300
HORVU.MOREX.r2.2HG0162350
HORVU.MOREX.r2.2HG0162580
HORVU.MOREX.r2.2HG0162650
HORVU.MOREX.r2.2HG0162750
HORVU.MOREX.r2.2HG0162770
HORVU.MOREX.r2.2HG0162870
HORVU.MOREX.r2.2HG0162900
HORVU.MOREX.r2.2HG0162910
HORVU.MOREX.r2.2HG0162940
HORVU.MOREX.r2.2HG0162970
HORVU.MOREX.r2.2HG0163000
HORVU.MOREX.r2.2HG0163040
HORVU.MOREX.r2.2HG0163060
HORVU.MOREX.r2.2HG0163080
HORVU.MOREX.r2.2HG0163100
HORVU.MOREX.r2.2HG0163370
HORVU.MOREX.r2.2HG0163580
HORVU.MOREX.r2.2HG0163630
HORVU.MOREX.r2.2HG0163700
HORVU.MOREX.r2.2HG0163770
HORVU.MOREX.r2.2HG0164330
HORVU.MOREX.r2.2HG0164440
HORVU.MOREX.r2.2HG0165020
HORVU.MOREX.r2.2HG0165100
HORVU.MOREX.r2.2HG0165340
HORVU.MOREX.r2.2HG0165530
HORVU.MOREX.r2.2HG0165640
HORVU.MOREX.r2.2HG0165730
HORVU.MOREX.r2.2HG0165880
HORVU.MOREX.r2.2HG0166700
HORVU.MOREX.r2.2HG0167050
HORVU.MOREX.r2.2HG0167080
HORVU.MOREX.r2.2HG0167130
HORVU.MOREX.r2.2HG0167320
HORVU.MOREX.r2.2HG0167630
HORVU.MOREX.r2.2HG0167640
HORVU.MOREX.r2.2HG0167760
HORVU.MOREX.r2.2HG0167990
HORVU.MOREX.r2.2HG0168000
HORVU.MOREX.r2.2HG0168130
HORVU.MOREX.r2.2HG0168140
HORVU.MOREX.r2.2HG0168350
HORVU.MOREX.r2.2HG0168370
HORVU.MOREX.r2.2HG0168500
HORVU.MOREX.r2.2HG0168590
HORVU.MOREX.r2.2HG0168620
HORVU.MOREX.r2.2HG0168630
HORVU.MOREX.r2.2HG0168770
HORVU.MOREX.r2.2HG0168870
HORVU.MOREX.r2.2HG0169080
HORVU.MOREX.r2.2HG0169170
HORVU.MOREX.r2.2HG0169280
HORVU.MOREX.r2.2HG0169420
HORVU.MOREX.r2.2HG0169890
HORVU.MOREX.r2.2HG0169910
HORVU.MOREX.r2.2HG0169930
HORVU.MOREX.r2.2HG0170120
HORVU.MOREX.r2.2HG0170420
HORVU.MOREX.r2.2HG0170450
HORVU.MOREX.r2.2HG0171110
HORVU.MOREX.r2.2HG0171240
HORVU.MOREX.r2.2HG0171640
HORVU.MOREX.r2.2HG0172370
HORVU.MOREX.r2.2HG0172600
HORVU.MOREX.r2.2HG0172630
HORVU.MOREX.r2.2HG0172690
HORVU.MOREX.r2.2HG0173010
HORVU.MOREX.r2.2HG0173140
HORVU.MOREX.r2.2HG0173200
HORVU.MOREX.r2.2HG0173340
HORVU.MOREX.r2.2HG0173580
HORVU.MOREX.r2.2HG0173650
HORVU.MOREX.r2.2HG0173700
HORVU.MOREX.r2.2HG0173760
HORVU.MOREX.r2.2HG0173770
HORVU.MOREX.r2.2HG0173890
HORVU.MOREX.r2.2HG0174210
HORVU.MOREX.r2.2HG0174320
HORVU.MOREX.r2.2HG0174420
HORVU.MOREX.r2.2HG0174540
HORVU.MOREX.r2.2HG0174570
HORVU.MOREX.r2.2HG0174830
HORVU.MOREX.r2.2HG0175200
HORVU.MOREX.r2.2HG0175250
HORVU.MOREX.r2.2HG0175470
HORVU.MOREX.r2.2HG0175570
HORVU.MOREX.r2.2HG0175590
HORVU.MOREX.r2.2HG0175690
HORVU.MOREX.r2.2HG0175700
HORVU.MOREX.r2.2HG0176040
HORVU.MOREX.r2.2HG0176070
HORVU.MOREX.r2.2HG0176130
HORVU.MOREX.r2.2HG0176140
HORVU.MOREX.r2.2HG0176310
HORVU.MOREX.r2.2HG0176400
HORVU.MOREX.r2.2HG0176410
HORVU.MOREX.r2.2HG0176790
HORVU.MOREX.r2.2HG0177240
HORVU.MOREX.r2.2HG0177430
HORVU.MOREX.r2.2HG0177560
HORVU.MOREX.r2.2HG0177740
HORVU.MOREX.r2.2HG0177810
HORVU.MOREX.r2.2HG0178410
HORVU.MOREX.r2.2HG0178530
HORVU.MOREX.r2.2HG0178560
HORVU.MOREX.r2.2HG0178800
[truncated: 5,715 more rows]

## Sheet: Table S7 D2 H3K9ac
Table S7. Genes marked with H3K9ac in D2
HORVU.MOREX.r2.1HG0000020
HORVU.MOREX.r2.1HG0000030
HORVU.MOREX.r2.1HG0000040
HORVU.MOREX.r2.1HG0000080
HORVU.MOREX.r2.1HG0000090
HORVU.MOREX.r2.1HG0000280
HORVU.MOREX.r2.1HG0000580
HORVU.MOREX.r2.1HG0000740
HORVU.MOREX.r2.1HG0001540
HORVU.MOREX.r2.1HG0001690
HORVU.MOREX.r2.1HG0001910
HORVU.MOREX.r2.1HG0001920
HORVU.MOREX.r2.1HG0001940
HORVU.MOREX.r2.1HG0002020
HORVU.MOREX.r2.1HG0002030
HORVU.MOREX.r2.1HG0002190
HORVU.MOREX.r2.1HG0002350
HORVU.MOREX.r2.1HG0002750
HORVU.MOREX.r2.1HG0002840
HORVU.MOREX.r2.1HG0003220
HORVU.MOREX.r2.1HG0003270
HORVU.MOREX.r2.1HG0003400
HORVU.MOREX.r2.1HG0003480
HORVU.MOREX.r2.1HG0003500
HORVU.MOREX.r2.1HG0003630
HORVU.MOREX.r2.1HG0003770
HORVU.MOREX.r2.1HG0003920
HORVU.MOREX.r2.1HG0004060
HORVU.MOREX.r2.1HG0004200
HORVU.MOREX.r2.1HG0004230
HORVU.MOREX.r2.1HG0004380
HORVU.MOREX.r2.1HG0004390
HORVU.MOREX.r2.1HG0004810
HORVU.MOREX.r2.1HG0004960
HORVU.MOREX.r2.1HG0005300
HORVU.MOREX.r2.1HG0005340
HORVU.MOREX.r2.1HG0005360
HORVU.MOREX.r2.1HG0005390
HORVU.MOREX.r2.1HG0005570
HORVU.MOREX.r2.1HG0005960
HORVU.MOREX.r2.1HG0006020
HORVU.MOREX.r2.1HG0006240
HORVU.MOREX.r2.1HG0006250
HORVU.MOREX.r2.1HG0006280
HORVU.MOREX.r2.1HG0006290
HORVU.MOREX.r2.1HG0006570
HORVU.MOREX.r2.1HG0006620
HORVU.MOREX.r2.1HG0006660
HORVU.MOREX.r2.1HG0007070
HORVU.MOREX.r2.1HG0007520
HORVU.MOREX.r2.1HG0007850
HORVU.MOREX.r2.1HG0008410
HORVU.MOREX.r2.1HG0008430
HORVU.MOREX.r2.1HG0008450
HORVU.MOREX.r2.1HG0008510
HORVU.MOREX.r2.1HG0008580
HORVU.MOREX.r2.1HG0008650
HORVU.MOREX.r2.1HG0008710
HORVU.MOREX.r2.1HG0008730
HORVU.MOREX.r2.1HG0008760
HORVU.MOREX.r2.1HG0008810
HORVU.MOREX.r2.1HG0008950
HORVU.MOREX.r2.1HG0009110
HORVU.MOREX.r2.1HG0009170
HORVU.MOREX.r2.1HG0009180
HORVU.MOREX.r2.1HG0009910
HORVU.MOREX.r2.1HG0010170
HORVU.MOREX.r2.1HG0010390
HORVU.MOREX.r2.1HG0010500
HORVU.MOREX.r2.1HG0010510
HORVU.MOREX.r2.1HG0010520
HORVU.MOREX.r2.1HG0010660
HORVU.MOREX.r2.1HG0011080
HORVU.MOREX.r2.1HG0011090
HORVU.MOREX.r2.1HG0011100
HORVU.MOREX.r2.1HG0011190
HORVU.MOREX.r2.1HG0011250
HORVU.MOREX.r2.1HG0011520
HORVU.MOREX.r2.1HG0012100
HORVU.MOREX.r2.1HG0012110
HORVU.MOREX.r2.1HG0012130
HORVU.MOREX.r2.1HG0012450
HORVU.MOREX.r2.1HG0012680
HORVU.MOREX.r2.1HG0012790
HORVU.MOREX.r2.1HG0012920
HORVU.MOREX.r2.1HG0012980
HORVU.MOREX.r2.1HG0012990
HORVU.MOREX.r2.1HG0013310
HORVU.MOREX.r2.1HG0013780
HORVU.MOREX.r2.1HG0014080
HORVU.MOREX.r2.1HG0014120
HORVU.MOREX.r2.1HG0014170
HORVU.MOREX.r2.1HG0014490
HORVU.MOREX.r2.1HG0014550
HORVU.MOREX.r2.1HG0014610
HORVU.MOREX.r2.1HG0014870
HORVU.MOREX.r2.1HG0015010
HORVU.MOREX.r2.1HG0015060
HORVU.MOREX.r2.1HG0015100
HORVU.MOREX.r2.1HG0015120
HORVU.MOREX.r2.1HG0015150
HORVU.MOREX.r2.1HG0015160
HORVU.MOREX.r2.1HG0015170
HORVU.MOREX.r2.1HG0015250
HORVU.MOREX.r2.1HG0015580
HORVU.MOREX.r2.1HG0015870
HORVU.MOREX.r2.1HG0015920
HORVU.MOREX.r2.1HG0015950
HORVU.MOREX.r2.1HG0016060
HORVU.MOREX.r2.1HG0016110
HORVU.MOREX.r2.1HG0016200
HORVU.MOREX.r2.1HG0016510
HORVU.MOREX.r2.1HG0016900
HORVU.MOREX.r2.1HG0017050
HORVU.MOREX.r2.1HG0017110
HORVU.MOREX.r2.1HG0017310
HORVU.MOREX.r2.1HG0017390
HORVU.MOREX.r2.1HG0017400
HORVU.MOREX.r2.1HG0017490
HORVU.MOREX.r2.1HG0017530
HORVU.MOREX.r2.1HG0018080
HORVU.MOREX.r2.1HG0018170
HORVU.MOREX.r2.1HG0018430
HORVU.MOREX.r2.1HG0018560
HORVU.MOREX.r2.1HG0018630
HORVU.MOREX.r2.1HG0018640
HORVU.MOREX.r2.1HG0018700
HORVU.MOREX.r2.1HG0018780
HORVU.MOREX.r2.1HG0018800
HORVU.MOREX.r2.1HG0018860
HORVU.MOREX.r2.1HG0018900
HORVU.MOREX.r2.1HG0018950
HORVU.MOREX.r2.1HG0018960
HORVU.MOREX.r2.1HG0018970
HORVU.MOREX.r2.1HG0019030
HORVU.MOREX.r2.1HG0019120
HORVU.MOREX.r2.1HG0019210
HORVU.MOREX.r2.1HG0019270
HORVU.MOREX.r2.1HG0019450
HORVU.MOREX.r2.1HG0019660
HORVU.MOREX.r2.1HG0019680
HORVU.MOREX.r2.1HG0020280
HORVU.MOREX.r2.1HG0020320
HORVU.MOREX.r2.1HG0020540
HORVU.MOREX.r2.1HG0020610
HORVU.MOREX.r2.1HG0020750
HORVU.MOREX.r2.1HG0020800
HORVU.MOREX.r2.1HG0021270
HORVU.MOREX.r2.1HG0021370
HORVU.MOREX.r2.1HG0021490
HORVU.MOREX.r2.1HG0021500
HORVU.MOREX.r2.1HG0021740
HORVU.MOREX.r2.1HG0021840
HORVU.MOREX.r2.1HG0021990
HORVU.MOREX.r2.1HG0022070
HORVU.MOREX.r2.1HG0022090
HORVU.MOREX.r2.1HG0022310
HORVU.MOREX.r2.1HG0022330
HORVU.MOREX.r2.1HG0022990
HORVU.MOREX.r2.1HG0023130
HORVU.MOREX.r2.1HG0023280
HORVU.MOREX.r2.1HG0023480
HORVU.MOREX.r2.1HG0023540
HORVU.MOREX.r2.1HG0023650
HORVU.MOREX.r2.1HG0023830
HORVU.MOREX.r2.1HG0023880
HORVU.MOREX.r2.1HG0024080
HORVU.MOREX.r2.1HG0024140
HORVU.MOREX.r2.1HG0024500
HORVU.MOREX.r2.1HG0024540
HORVU.MOREX.r2.1HG0024590
HORVU.MOREX.r2.1HG0024620
HORVU.MOREX.r2.1HG0025060
HORVU.MOREX.r2.1HG0025240
HORVU.MOREX.r2.1HG0025250
HORVU.MOREX.r2.1HG0025280
HORVU.MOREX.r2.1HG0025620
HORVU.MOREX.r2.1HG0025820
HORVU.MOREX.r2.1HG0025840
HORVU.MOREX.r2.1HG0025850
HORVU.MOREX.r2.1HG0025860
HORVU.MOREX.r2.1HG0025870
HORVU.MOREX.r2.1HG0026180
HORVU.MOREX.r2.1HG0026230
HORVU.MOREX.r2.1HG0026290
HORVU.MOREX.r2.1HG0026490
HORVU.MOREX.r2.1HG0026520
HORVU.MOREX.r2.1HG0026700
HORVU.MOREX.r2.1HG0026750
HORVU.MOREX.r2.1HG0026820
HORVU.MOREX.r2.1HG0026900
HORVU.MOREX.r2.1HG0026930
HORVU.MOREX.r2.1HG0026950
HORVU.MOREX.r2.1HG0027030
HORVU.MOREX.r2.1HG0027120
HORVU.MOREX.r2.1HG0027260
HORVU.MOREX.r2.1HG0027280
HORVU.MOREX.r2.1HG0027380
HORVU.MOREX.r2.1HG0027480
HORVU.MOREX.r2.1HG0027640
HORVU.MOREX.r2.1HG0027750
HORVU.MOREX.r2.1HG0028090
HORVU.MOREX.r2.1HG0028170
HORVU.MOREX.r2.1HG0028200
HORVU.MOREX.r2.1HG0028440
HORVU.MOREX.r2.1HG0028630
HORVU.MOREX.r2.1HG0028650
HORVU.MOREX.r2.1HG0028710
HORVU.MOREX.r2.1HG0028720
HORVU.MOREX.r2.1HG0028770
HORVU.MOREX.r2.1HG0028790
HORVU.MOREX.r2.1HG0029110
HORVU.MOREX.r2.1HG0029160
HORVU.MOREX.r2.1HG0029240
HORVU.MOREX.r2.1HG0029450
HORVU.MOREX.r2.1HG0029460
HORVU.MOREX.r2.1HG0029540
HORVU.MOREX.r2.1HG0029940
HORVU.MOREX.r2.1HG0029960
HORVU.MOREX.r2.1HG0029970
HORVU.MOREX.r2.1HG0030150
HORVU.MOREX.r2.1HG0030210
HORVU.MOREX.r2.1HG0030220
HORVU.MOREX.r2.1HG0030230
HORVU.MOREX.r2.1HG0030350
HORVU.MOREX.r2.1HG0030460
HORVU.MOREX.r2.1HG0030470
HORVU.MOREX.r2.1HG0030920
HORVU.MOREX.r2.1HG0030970
HORVU.MOREX.r2.1HG0031030
HORVU.MOREX.r2.1HG0031080
HORVU.MOREX.r2.1HG0031180
HORVU.MOREX.r2.1HG0031450
HORVU.MOREX.r2.1HG0031690
HORVU.MOREX.r2.1HG0031860
HORVU.MOREX.r2.1HG0031930
HORVU.MOREX.r2.1HG0032070
HORVU.MOREX.r2.1HG0032340
HORVU.MOREX.r2.1HG0032520
HORVU.MOREX.r2.1HG0032660
HORVU.MOREX.r2.1HG0032670
HORVU.MOREX.r2.1HG0032680
HORVU.MOREX.r2.1HG0032850
HORVU.MOREX.r2.1HG0032940
HORVU.MOREX.r2.1HG0033090
HORVU.MOREX.r2.1HG0033150
HORVU.MOREX.r2.1HG0033380
HORVU.MOREX.r2.1HG0033390
HORVU.MOREX.r2.1HG0033460
HORVU.MOREX.r2.1HG0033510
HORVU.MOREX.r2.1HG0033530
HORVU.MOREX.r2.1HG0033580
HORVU.MOREX.r2.1HG0033800
HORVU.MOREX.r2.1HG0033810
HORVU.MOREX.r2.1HG0033830
HORVU.MOREX.r2.1HG0033860
HORVU.MOREX.r2.1HG0033970
HORVU.MOREX.r2.1HG0034150
HORVU.MOREX.r2.1HG0034160
HORVU.MOREX.r2.1HG0034220
HORVU.MOREX.r2.1HG0034250
HORVU.MOREX.r2.1HG0034530
HORVU.MOREX.r2.1HG0034630
HORVU.MOREX.r2.1HG0034800
HORVU.MOREX.r2.1HG0034980
HORVU.MOREX.r2.1HG0035040
HORVU.MOREX.r2.1HG0035050
HORVU.MOREX.r2.1HG0035260
HORVU.MOREX.r2.1HG0035290
HORVU.MOREX.r2.1HG0035340
HORVU.MOREX.r2.1HG0035590
HORVU.MOREX.r2.1HG0035690
HORVU.MOREX.r2.1HG0035720
HORVU.MOREX.r2.1HG0035800
HORVU.MOREX.r2.1HG0036020
HORVU.MOREX.r2.1HG0036120
HORVU.MOREX.r2.1HG0036440
HORVU.MOREX.r2.1HG0036500
HORVU.MOREX.r2.1HG0036750
HORVU.MOREX.r2.1HG0036810
HORVU.MOREX.r2.1HG0036820
HORVU.MOREX.r2.1HG0036860
HORVU.MOREX.r2.1HG0036980
HORVU.MOREX.r2.1HG0036990
HORVU.MOREX.r2.1HG0037040
HORVU.MOREX.r2.1HG0037050
HORVU.MOREX.r2.1HG0037070
HORVU.MOREX.r2.1HG0037100
HORVU.MOREX.r2.1HG0037110
HORVU.MOREX.r2.1HG0037120
HORVU.MOREX.r2.1HG0037130
HORVU.MOREX.r2.1HG0037240
HORVU.MOREX.r2.1HG0037520
HORVU.MOREX.r2.1HG0037530
HORVU.MOREX.r2.1HG0037750
HORVU.MOREX.r2.1HG0037790
HORVU.MOREX.r2.1HG0037990
HORVU.MOREX.r2.1HG0038050
HORVU.MOREX.r2.1HG0038310
HORVU.MOREX.r2.1HG0038340
HORVU.MOREX.r2.1HG0038400
HORVU.MOREX.r2.1HG0038570
HORVU.MOREX.r2.1HG0038580
HORVU.MOREX.r2.1HG0038600
HORVU.MOREX.r2.1HG0038720
HORVU.MOREX.r2.1HG0038750
HORVU.MOREX.r2.1HG0038950
HORVU.MOREX.r2.1HG0039050
HORVU.MOREX.r2.1HG0039060
HORVU.MOREX.r2.1HG0039110
HORVU.MOREX.r2.1HG0039170
HORVU.MOREX.r2.1HG0039290
HORVU.MOREX.r2.1HG0039540
HORVU.MOREX.r2.1HG0039580
HORVU.MOREX.r2.1HG0039600
HORVU.MOREX.r2.1HG0039730
HORVU.MOREX.r2.1HG0039830
HORVU.MOREX.r2.1HG0039850
HORVU.MOREX.r2.1HG0040060
HORVU.MOREX.r2.1HG0040070
HORVU.MOREX.r2.1HG0040290
HORVU.MOREX.r2.1HG0040330
HORVU.MOREX.r2.1HG0040490
HORVU.MOREX.r2.1HG0040530
HORVU.MOREX.r2.1HG0040640
HORVU.MOREX.r2.1HG0040660
HORVU.MOREX.r2.1HG0040680
HORVU.MOREX.r2.1HG0040700
HORVU.MOREX.r2.1HG0040710
HORVU.MOREX.r2.1HG0040840
HORVU.MOREX.r2.1HG0040850
HORVU.MOREX.r2.1HG0040860
HORVU.MOREX.r2.1HG0040870
HORVU.MOREX.r2.1HG0040930
HORVU.MOREX.r2.1HG0040940
HORVU.MOREX.r2.1HG0040990
HORVU.MOREX.r2.1HG0041030
HORVU.MOREX.r2.1HG0041270
HORVU.MOREX.r2.1HG0041280
HORVU.MOREX.r2.1HG0041290
HORVU.MOREX.r2.1HG0041310
HORVU.MOREX.r2.1HG0041360
HORVU.MOREX.r2.1HG0041440
HORVU.MOREX.r2.1HG0041590
HORVU.MOREX.r2.1HG0041600
HORVU.MOREX.r2.1HG0041620
HORVU.MOREX.r2.1HG0041680
HORVU.MOREX.r2.1HG0041730
HORVU.MOREX.r2.1HG0041740
HORVU.MOREX.r2.1HG0041760
HORVU.MOREX.r2.1HG0041850
HORVU.MOREX.r2.1HG0041940
HORVU.MOREX.r2.1HG0041990
HORVU.MOREX.r2.1HG0042090
HORVU.MOREX.r2.1HG0042120
HORVU.MOREX.r2.1HG0042220
HORVU.MOREX.r2.1HG0042240
HORVU.MOREX.r2.1HG0042250
HORVU.MOREX.r2.1HG0042280
HORVU.MOREX.r2.1HG0042330
HORVU.MOREX.r2.1HG0042770
HORVU.MOREX.r2.1HG0042810
HORVU.MOREX.r2.1HG0042850
HORVU.MOREX.r2.1HG0042930
HORVU.MOREX.r2.1HG0043060
HORVU.MOREX.r2.1HG0043190
HORVU.MOREX.r2.1HG0043480
HORVU.MOREX.r2.1HG0043550
HORVU.MOREX.r2.1HG0043580
HORVU.MOREX.r2.1HG0043590
HORVU.MOREX.r2.1HG0043620
HORVU.MOREX.r2.1HG0043680
HORVU.MOREX.r2.1HG0043710
HORVU.MOREX.r2.1HG0043720
HORVU.MOREX.r2.1HG0043730
HORVU.MOREX.r2.1HG0043780
HORVU.MOREX.r2.1HG0043800
HORVU.MOREX.r2.1HG0044030
HORVU.MOREX.r2.1HG0044040
HORVU.MOREX.r2.1HG0044090
HORVU.MOREX.r2.1HG0044190
HORVU.MOREX.r2.1HG0044400
HORVU.MOREX.r2.1HG0044560
HORVU.MOREX.r2.1HG0044600
HORVU.MOREX.r2.1HG0044770
HORVU.MOREX.r2.1HG0044800
HORVU.MOREX.r2.1HG0044820
HORVU.MOREX.r2.1HG0044900
HORVU.MOREX.r2.1HG0044970
HORVU.MOREX.r2.1HG0045220
HORVU.MOREX.r2.1HG0045240
HORVU.MOREX.r2.1HG0045410
HORVU.MOREX.r2.1HG0045450
HORVU.MOREX.r2.1HG0045500
HORVU.MOREX.r2.1HG0045530
HORVU.MOREX.r2.1HG0045620
HORVU.MOREX.r2.1HG0045760
HORVU.MOREX.r2.1HG0045810
HORVU.MOREX.r2.1HG0045820
HORVU.MOREX.r2.1HG0045890
HORVU.MOREX.r2.1HG0045910
HORVU.MOREX.r2.1HG0046050
HORVU.MOREX.r2.1HG0046160
HORVU.MOREX.r2.1HG0046180
HORVU.MOREX.r2.1HG0046190
HORVU.MOREX.r2.1HG0046210
HORVU.MOREX.r2.1HG0046370
HORVU.MOREX.r2.1HG0046540
HORVU.MOREX.r2.1HG0046700
HORVU.MOREX.r2.1HG0046800
HORVU.MOREX.r2.1HG0046820
HORVU.MOREX.r2.1HG0046830
HORVU.MOREX.r2.1HG0046850
HORVU.MOREX.r2.1HG0046990
HORVU.MOREX.r2.1HG0047000
HORVU.MOREX.r2.1HG0047050
HORVU.MOREX.r2.1HG0047060
HORVU.MOREX.r2.1HG0047070
HORVU.MOREX.r2.1HG0047120
HORVU.MOREX.r2.1HG0047440
HORVU.MOREX.r2.1HG0047520
HORVU.MOREX.r2.1HG0047540
HORVU.MOREX.r2.1HG0047590
HORVU.MOREX.r2.1HG0047690
HORVU.MOREX.r2.1HG0047810
HORVU.MOREX.r2.1HG0047940
HORVU.MOREX.r2.1HG0047960
HORVU.MOREX.r2.1HG0047970
HORVU.MOREX.r2.1HG0048300
HORVU.MOREX.r2.1HG0048540
HORVU.MOREX.r2.1HG0048580
HORVU.MOREX.r2.1HG0048610
HORVU.MOREX.r2.1HG0048630
HORVU.MOREX.r2.1HG0048780
HORVU.MOREX.r2.1HG0048850
HORVU.MOREX.r2.1HG0049020
HORVU.MOREX.r2.1HG0049170
HORVU.MOREX.r2.1HG0049200
HORVU.MOREX.r2.1HG0049310
HORVU.MOREX.r2.1HG0049370
HORVU.MOREX.r2.1HG0049570
HORVU.MOREX.r2.1HG0049640
HORVU.MOREX.r2.1HG0049650
HORVU.MOREX.r2.1HG0049710
HORVU.MOREX.r2.1HG0049810
HORVU.MOREX.r2.1HG0049900
HORVU.MOREX.r2.1HG0049940
HORVU.MOREX.r2.1HG0049950
HORVU.MOREX.r2.1HG0049960
HORVU.MOREX.r2.1HG0050020
HORVU.MOREX.r2.1HG0050060
HORVU.MOREX.r2.1HG0050100
HORVU.MOREX.r2.1HG0050170
HORVU.MOREX.r2.1HG0050270
HORVU.MOREX.r2.1HG0050340
HORVU.MOREX.r2.1HG0050410
HORVU.MOREX.r2.1HG0050420
HORVU.MOREX.r2.1HG0050430
HORVU.MOREX.r2.1HG0050460
HORVU.MOREX.r2.1HG0050480
HORVU.MOREX.r2.1HG0050500
HORVU.MOREX.r2.1HG0050550
HORVU.MOREX.r2.1HG0050610
HORVU.MOREX.r2.1HG0050800
HORVU.MOREX.r2.1HG0050840
HORVU.MOREX.r2.1HG0050980
HORVU.MOREX.r2.1HG0051010
HORVU.MOREX.r2.1HG0051020
HORVU.MOREX.r2.1HG0051040
HORVU.MOREX.r2.1HG0051160
HORVU.MOREX.r2.1HG0051320
HORVU.MOREX.r2.1HG0051440
HORVU.MOREX.r2.1HG0051570
HORVU.MOREX.r2.1HG0051620
HORVU.MOREX.r2.1HG0051630
HORVU.MOREX.r2.1HG0051640
HORVU.MOREX.r2.1HG0051650
HORVU.MOREX.r2.1HG0051710
HORVU.MOREX.r2.1HG0051740
HORVU.MOREX.r2.1HG0051920
HORVU.MOREX.r2.1HG0051950
HORVU.MOREX.r2.1HG0052290
HORVU.MOREX.r2.1HG0052310
HORVU.MOREX.r2.1HG0052400
HORVU.MOREX.r2.1HG0052560
HORVU.MOREX.r2.1HG0052590
HORVU.MOREX.r2.1HG0052870
HORVU.MOREX.r2.1HG0052920
HORVU.MOREX.r2.1HG0053020
HORVU.MOREX.r2.1HG0053170
HORVU.MOREX.r2.1HG0053340
HORVU.MOREX.r2.1HG0053440
HORVU.MOREX.r2.1HG0053860
HORVU.MOREX.r2.1HG0053910
HORVU.MOREX.r2.1HG0053920
HORVU.MOREX.r2.1HG0054330
HORVU.MOREX.r2.1HG0054340
HORVU.MOREX.r2.1HG0054550
HORVU.MOREX.r2.1HG0054750
HORVU.MOREX.r2.1HG0054760
HORVU.MOREX.r2.1HG0054820
HORVU.MOREX.r2.1HG0054850
HORVU.MOREX.r2.1HG0055060
HORVU.MOREX.r2.1HG0055100
HORVU.MOREX.r2.1HG0055200
HORVU.MOREX.r2.1HG0055220
HORVU.MOREX.r2.1HG0055450
HORVU.MOREX.r2.1HG0055570
HORVU.MOREX.r2.1HG0055720
HORVU.MOREX.r2.1HG0055940
HORVU.MOREX.r2.1HG0056000
HORVU.MOREX.r2.1HG0056030
HORVU.MOREX.r2.1HG0056040
HORVU.MOREX.r2.1HG0056070
HORVU.MOREX.r2.1HG0056090
HORVU.MOREX.r2.1HG0056100
HORVU.MOREX.r2.1HG0056140
HORVU.MOREX.r2.1HG0056180
HORVU.MOREX.r2.1HG0056240
HORVU.MOREX.r2.1HG0056250
HORVU.MOREX.r2.1HG0056320
HORVU.MOREX.r2.1HG0056390
HORVU.MOREX.r2.1HG0056600
HORVU.MOREX.r2.1HG0056620
HORVU.MOREX.r2.1HG0056720
HORVU.MOREX.r2.1HG0057000
HORVU.MOREX.r2.1HG0057320
HORVU.MOREX.r2.1HG0057350
HORVU.MOREX.r2.1HG0057360
HORVU.MOREX.r2.1HG0057550
HORVU.MOREX.r2.1HG0057810
HORVU.MOREX.r2.1HG0057820
HORVU.MOREX.r2.1HG0057910
HORVU.MOREX.r2.1HG0057920
HORVU.MOREX.r2.1HG0058040
HORVU.MOREX.r2.1HG0058060
HORVU.MOREX.r2.1HG0058150
HORVU.MOREX.r2.1HG0058180
HORVU.MOREX.r2.1HG0058350
HORVU.MOREX.r2.1HG0058360
HORVU.MOREX.r2.1HG0058430
HORVU.MOREX.r2.1HG0058580
HORVU.MOREX.r2.1HG0058750
HORVU.MOREX.r2.1HG0058860
HORVU.MOREX.r2.1HG0059030
HORVU.MOREX.r2.1HG0059060
HORVU.MOREX.r2.1HG0059130
HORVU.MOREX.r2.1HG0059170
HORVU.MOREX.r2.1HG0059200
HORVU.MOREX.r2.1HG0059240
HORVU.MOREX.r2.1HG0059260
HORVU.MOREX.r2.1HG0059510
HORVU.MOREX.r2.1HG0059540
HORVU.MOREX.r2.1HG0059580
HORVU.MOREX.r2.1HG0059670
HORVU.MOREX.r2.1HG0059750
HORVU.MOREX.r2.1HG0059820
HORVU.MOREX.r2.1HG0059880
HORVU.MOREX.r2.1HG0059890
HORVU.MOREX.r2.1HG0059900
HORVU.MOREX.r2.1HG0060050
HORVU.MOREX.r2.1HG0060080
HORVU.MOREX.r2.1HG0060170
HORVU.MOREX.r2.1HG0060190
HORVU.MOREX.r2.1HG0060230
HORVU.MOREX.r2.1HG0060450
HORVU.MOREX.r2.1HG0060460
HORVU.MOREX.r2.1HG0060690
HORVU.MOREX.r2.1HG0060710
HORVU.MOREX.r2.1HG0060880
HORVU.MOREX.r2.1HG0060990
HORVU.MOREX.r2.1HG0061190
HORVU.MOREX.r2.1HG0061210
HORVU.MOREX.r2.1HG0061220
HORVU.MOREX.r2.1HG0061310
HORVU.MOREX.r2.1HG0061370
HORVU.MOREX.r2.1HG0061410
HORVU.MOREX.r2.1HG0061660
HORVU.MOREX.r2.1HG0061700
HORVU.MOREX.r2.1HG0061740
HORVU.MOREX.r2.1HG0061800
HORVU.MOREX.r2.1HG0061930
HORVU.MOREX.r2.1HG0062030
HORVU.MOREX.r2.1HG0062110
HORVU.MOREX.r2.1HG0062130
HORVU.MOREX.r2.1HG0062250
HORVU.MOREX.r2.1HG0062370
HORVU.MOREX.r2.1HG0062410
HORVU.MOREX.r2.1HG0062420
HORVU.MOREX.r2.1HG0062610
HORVU.MOREX.r2.1HG0062640
HORVU.MOREX.r2.1HG0062670
HORVU.MOREX.r2.1HG0062680
HORVU.MOREX.r2.1HG0063070
HORVU.MOREX.r2.1HG0063140
HORVU.MOREX.r2.1HG0063260
HORVU.MOREX.r2.1HG0063340
HORVU.MOREX.r2.1HG0063390
HORVU.MOREX.r2.1HG0063400
HORVU.MOREX.r2.1HG0063660
HORVU.MOREX.r2.1HG0063710
HORVU.MOREX.r2.1HG0063720
HORVU.MOREX.r2.1HG0063860
HORVU.MOREX.r2.1HG0063900
HORVU.MOREX.r2.1HG0063930
HORVU.MOREX.r2.1HG0063980
HORVU.MOREX.r2.1HG0064000
HORVU.MOREX.r2.1HG0064090
HORVU.MOREX.r2.1HG0064250
HORVU.MOREX.r2.1HG0064440
HORVU.MOREX.r2.1HG0064610
HORVU.MOREX.r2.1HG0064720
HORVU.MOREX.r2.1HG0064740
HORVU.MOREX.r2.1HG0064940
HORVU.MOREX.r2.1HG0065150
HORVU.MOREX.r2.1HG0065230
HORVU.MOREX.r2.1HG0065250
HORVU.MOREX.r2.1HG0065460
HORVU.MOREX.r2.1HG0065480
HORVU.MOREX.r2.1HG0065490
HORVU.MOREX.r2.1HG0065550
HORVU.MOREX.r2.1HG0065600
HORVU.MOREX.r2.1HG0065910
HORVU.MOREX.r2.1HG0066030
HORVU.MOREX.r2.1HG0066050
HORVU.MOREX.r2.1HG0066160
HORVU.MOREX.r2.1HG0066180
HORVU.MOREX.r2.1HG0066190
HORVU.MOREX.r2.1HG0066230
HORVU.MOREX.r2.1HG0066400
HORVU.MOREX.r2.1HG0066410
HORVU.MOREX.r2.1HG0066500
HORVU.MOREX.r2.1HG0066720
HORVU.MOREX.r2.1HG0066840
HORVU.MOREX.r2.1HG0066850
HORVU.MOREX.r2.1HG0066870
HORVU.MOREX.r2.1HG0066880
HORVU.MOREX.r2.1HG0067220
HORVU.MOREX.r2.1HG0067230
HORVU.MOREX.r2.1HG0067260
HORVU.MOREX.r2.1HG0067390
HORVU.MOREX.r2.1HG0067440
HORVU.MOREX.r2.1HG0067490
HORVU.MOREX.r2.1HG0067540
HORVU.MOREX.r2.1HG0067800
HORVU.MOREX.r2.1HG0067820
HORVU.MOREX.r2.1HG0067830
HORVU.MOREX.r2.1HG0067840
HORVU.MOREX.r2.1HG0067870
HORVU.MOREX.r2.1HG0067900
HORVU.MOREX.r2.1HG0068050
HORVU.MOREX.r2.1HG0068170
HORVU.MOREX.r2.1HG0068180
HORVU.MOREX.r2.1HG0068210
HORVU.MOREX.r2.1HG0068360
HORVU.MOREX.r2.1HG0068420
HORVU.MOREX.r2.1HG0068480
HORVU.MOREX.r2.1HG0068660
HORVU.MOREX.r2.1HG0068680
HORVU.MOREX.r2.1HG0068760
HORVU.MOREX.r2.1HG0069310
HORVU.MOREX.r2.1HG0069640
HORVU.MOREX.r2.1HG0069670
HORVU.MOREX.r2.1HG0069860
HORVU.MOREX.r2.1HG0069880
HORVU.MOREX.r2.1HG0070040
HORVU.MOREX.r2.1HG0070100
HORVU.MOREX.r2.1HG0070170
HORVU.MOREX.r2.1HG0070240
HORVU.MOREX.r2.1HG0070250
HORVU.MOREX.r2.1HG0070310
HORVU.MOREX.r2.1HG0070480
HORVU.MOREX.r2.1HG0070490
HORVU.MOREX.r2.1HG0070680
HORVU.MOREX.r2.1HG0071020
HORVU.MOREX.r2.1HG0071510
HORVU.MOREX.r2.1HG0071830
HORVU.MOREX.r2.1HG0072050
HORVU.MOREX.r2.1HG0072140
HORVU.MOREX.r2.1HG0072340
HORVU.MOREX.r2.1HG0072360
HORVU.MOREX.r2.1HG0072750
HORVU.MOREX.r2.1HG0072860
HORVU.MOREX.r2.1HG0072870
HORVU.MOREX.r2.1HG0073120
HORVU.MOREX.r2.1HG0073210
HORVU.MOREX.r2.1HG0073230
HORVU.MOREX.r2.1HG0073250
HORVU.MOREX.r2.1HG0073350
HORVU.MOREX.r2.1HG0073450
HORVU.MOREX.r2.1HG0073640
HORVU.MOREX.r2.1HG0073720
HORVU.MOREX.r2.1HG0074000
HORVU.MOREX.r2.1HG0074060
HORVU.MOREX.r2.1HG0074100
HORVU.MOREX.r2.1HG0074110
HORVU.MOREX.r2.1HG0074140
HORVU.MOREX.r2.1HG0074170
HORVU.MOREX.r2.1HG0074190
HORVU.MOREX.r2.1HG0074230
HORVU.MOREX.r2.1HG0074280
HORVU.MOREX.r2.1HG0074290
HORVU.MOREX.r2.1HG0074360
HORVU.MOREX.r2.1HG0074410
HORVU.MOREX.r2.1HG0074680
HORVU.MOREX.r2.1HG0075140
HORVU.MOREX.r2.1HG0075150
HORVU.MOREX.r2.1HG0075440
HORVU.MOREX.r2.1HG0075470
HORVU.MOREX.r2.1HG0075680
HORVU.MOREX.r2.1HG0075740
HORVU.MOREX.r2.1HG0075920
HORVU.MOREX.r2.1HG0075930
HORVU.MOREX.r2.1HG0076110
HORVU.MOREX.r2.1HG0076180
HORVU.MOREX.r2.1HG0076360
HORVU.MOREX.r2.1HG0076420
HORVU.MOREX.r2.1HG0076430
HORVU.MOREX.r2.1HG0076590
HORVU.MOREX.r2.1HG0076620
HORVU.MOREX.r2.1HG0076630
HORVU.MOREX.r2.1HG0076840
HORVU.MOREX.r2.1HG0077240
HORVU.MOREX.r2.1HG0077480
HORVU.MOREX.r2.1HG0077750
HORVU.MOREX.r2.1HG0077760
HORVU.MOREX.r2.1HG0077880
HORVU.MOREX.r2.1HG0077910
HORVU.MOREX.r2.1HG0078020
HORVU.MOREX.r2.1HG0078100
HORVU.MOREX.r2.1HG0078140
HORVU.MOREX.r2.1HG0078200
HORVU.MOREX.r2.1HG0078240
HORVU.MOREX.r2.1HG0078370
HORVU.MOREX.r2.1HG0078380
HORVU.MOREX.r2.1HG0078400
HORVU.MOREX.r2.1HG0078410
HORVU.MOREX.r2.1HG0078440
HORVU.MOREX.r2.1HG0078650
HORVU.MOREX.r2.1HG0078670
HORVU.MOREX.r2.1HG0000050
HORVU.MOREX.r2.1HG0000060
HORVU.MOREX.r2.1HG0000070
HORVU.MOREX.r2.1HG0000110
HORVU.MOREX.r2.1HG0000440
HORVU.MOREX.r2.1HG0000670
HORVU.MOREX.r2.1HG0000700
HORVU.MOREX.r2.1HG0000730
HORVU.MOREX.r2.1HG0001530
HORVU.MOREX.r2.1HG0001550
HORVU.MOREX.r2.1HG0001580
HORVU.MOREX.r2.1HG0001980
HORVU.MOREX.r2.1HG0002170
HORVU.MOREX.r2.1HG0002180
HORVU.MOREX.r2.1HG0002200
HORVU.MOREX.r2.1HG0002310
HORVU.MOREX.r2.1HG0002320
HORVU.MOREX.r2.1HG0002330
HORVU.MOREX.r2.1HG0002860
HORVU.MOREX.r2.1HG0003080
HORVU.MOREX.r2.1HG0003170
HORVU.MOREX.r2.1HG0003210
HORVU.MOREX.r2.1HG0003470
HORVU.MOREX.r2.1HG0003620
HORVU.MOREX.r2.1HG0003870
HORVU.MOREX.r2.1HG0004070
HORVU.MOREX.r2.1HG0004080
HORVU.MOREX.r2.1HG0004130
HORVU.MOREX.r2.1HG0004270
HORVU.MOREX.r2.1HG0004410
HORVU.MOREX.r2.1HG0004680
HORVU.MOREX.r2.1HG0004700
HORVU.MOREX.r2.1HG0004740
HORVU.MOREX.r2.1HG0004760
HORVU.MOREX.r2.1HG0004820
HORVU.MOREX.r2.1HG0004840
HORVU.MOREX.r2.1HG0004850
HORVU.MOREX.r2.1HG0005350
HORVU.MOREX.r2.1HG0005640
HORVU.MOREX.r2.1HG0005800
HORVU.MOREX.r2.1HG0005810
HORVU.MOREX.r2.1HG0005860
HORVU.MOREX.r2.1HG0005880
HORVU.MOREX.r2.1HG0006010
HORVU.MOREX.r2.1HG0006200
HORVU.MOREX.r2.1HG0006390
HORVU.MOREX.r2.1HG0006400
HORVU.MOREX.r2.1HG0006540
HORVU.MOREX.r2.1HG0006710
HORVU.MOREX.r2.1HG0006720
HORVU.MOREX.r2.1HG0007340
HORVU.MOREX.r2.1HG0007670
HORVU.MOREX.r2.1HG0008120
HORVU.MOREX.r2.1HG0008270
HORVU.MOREX.r2.1HG0008320
HORVU.MOREX.r2.1HG0008370
HORVU.MOREX.r2.1HG0008420
HORVU.MOREX.r2.1HG0009100
HORVU.MOREX.r2.1HG0009190
HORVU.MOREX.r2.1HG0009240
HORVU.MOREX.r2.1HG0009250
HORVU.MOREX.r2.1HG0009310
HORVU.MOREX.r2.1HG0009340
HORVU.MOREX.r2.1HG0009630
HORVU.MOREX.r2.1HG0009970
HORVU.MOREX.r2.1HG0010090
HORVU.MOREX.r2.1HG0010610
HORVU.MOREX.r2.1HG0010640
HORVU.MOREX.r2.1HG0010650
HORVU.MOREX.r2.1HG0010840
HORVU.MOREX.r2.1HG0010950
HORVU.MOREX.r2.1HG0011120
HORVU.MOREX.r2.1HG0011170
HORVU.MOREX.r2.1HG0011270
HORVU.MOREX.r2.1HG0011280
HORVU.MOREX.r2.1HG0011320
HORVU.MOREX.r2.1HG0011460
HORVU.MOREX.r2.1HG0011660
HORVU.MOREX.r2.1HG0011690
HORVU.MOREX.r2.1HG0011700
HORVU.MOREX.r2.1HG0011710
HORVU.MOREX.r2.1HG0011910
HORVU.MOREX.r2.1HG0011920
HORVU.MOREX.r2.1HG0012390
HORVU.MOREX.r2.1HG0012470
HORVU.MOREX.r2.1HG0012580
HORVU.MOREX.r2.1HG0012660
HORVU.MOREX.r2.1HG0012710
HORVU.MOREX.r2.1HG0012730
HORVU.MOREX.r2.1HG0012760
HORVU.MOREX.r2.1HG0012890
HORVU.MOREX.r2.1HG0012910
HORVU.MOREX.r2.1HG0013090
HORVU.MOREX.r2.1HG0013100
HORVU.MOREX.r2.1HG0013190
HORVU.MOREX.r2.1HG0013320
HORVU.MOREX.r2.1HG0013500
HORVU.MOREX.r2.1HG0013750
HORVU.MOREX.r2.1HG0013790
HORVU.MOREX.r2.1HG0013890
HORVU.MOREX.r2.1HG0013930
HORVU.MOREX.r2.1HG0013960
HORVU.MOREX.r2.1HG0014050
HORVU.MOREX.r2.1HG0014140
HORVU.MOREX.r2.1HG0014200
HORVU.MOREX.r2.1HG0014210
HORVU.MOREX.r2.1HG0014220
HORVU.MOREX.r2.1HG0014560
HORVU.MOREX.r2.1HG0014570
HORVU.MOREX.r2.1HG0014600
HORVU.MOREX.r2.1HG0014740
HORVU.MOREX.r2.1HG0014840
HORVU.MOREX.r2.1HG0014990
HORVU.MOREX.r2.1HG0015080
HORVU.MOREX.r2.1HG0015140
HORVU.MOREX.r2.1HG0015280
HORVU.MOREX.r2.1HG0015630
HORVU.MOREX.r2.1HG0015640
HORVU.MOREX.r2.1HG0015690
HORVU.MOREX.r2.1HG0015940
HORVU.MOREX.r2.1HG0015970
HORVU.MOREX.r2.1HG0016090
HORVU.MOREX.r2.1HG0016100
HORVU.MOREX.r2.1HG0016190
HORVU.MOREX.r2.1HG0016250
HORVU.MOREX.r2.1HG0016430
HORVU.MOREX.r2.1HG0016540
HORVU.MOREX.r2.1HG0016720
HORVU.MOREX.r2.1HG0017160
HORVU.MOREX.r2.1HG0017170
HORVU.MOREX.r2.1HG0017270
HORVU.MOREX.r2.1HG0017380
HORVU.MOREX.r2.1HG0017460
HORVU.MOREX.r2.1HG0017470
HORVU.MOREX.r2.1HG0017770
HORVU.MOREX.r2.1HG0017800
HORVU.MOREX.r2.1HG0017820
HORVU.MOREX.r2.1HG0018010
HORVU.MOREX.r2.1HG0018100
HORVU.MOREX.r2.1HG0018140
HORVU.MOREX.r2.1HG0018200
HORVU.MOREX.r2.1HG0018520
HORVU.MOREX.r2.1HG0018790
HORVU.MOREX.r2.1HG0018930
HORVU.MOREX.r2.1HG0019020
HORVU.MOREX.r2.1HG0019040
HORVU.MOREX.r2.1HG0019050
HORVU.MOREX.r2.1HG0019110
HORVU.MOREX.r2.1HG0019300
HORVU.MOREX.r2.1HG0019520
HORVU.MOREX.r2.1HG0019550
HORVU.MOREX.r2.1HG0019570
HORVU.MOREX.r2.1HG0019580
HORVU.MOREX.r2.1HG0019710
HORVU.MOREX.r2.1HG0019860
HORVU.MOREX.r2.1HG0019910
HORVU.MOREX.r2.1HG0020240
HORVU.MOREX.r2.1HG0020380
HORVU.MOREX.r2.1HG0020460
HORVU.MOREX.r2.1HG0020600
HORVU.MOREX.r2.1HG0020650
HORVU.MOREX.r2.1HG0020950
HORVU.MOREX.r2.1HG0021120
HORVU.MOREX.r2.1HG0021190
HORVU.MOREX.r2.1HG0021200
HORVU.MOREX.r2.1HG0021230
HORVU.MOREX.r2.1HG0021290
HORVU.MOREX.r2.1HG0021480
HORVU.MOREX.r2.1HG0021720
HORVU.MOREX.r2.1HG0021830
HORVU.MOREX.r2.1HG0022130
HORVU.MOREX.r2.1HG0022140
HORVU.MOREX.r2.1HG0022170
HORVU.MOREX.r2.1HG0023100
HORVU.MOREX.r2.1HG0023180
HORVU.MOREX.r2.1HG0023190
HORVU.MOREX.r2.1HG0023220
HORVU.MOREX.r2.1HG0023250
HORVU.MOREX.r2.1HG0023270
HORVU.MOREX.r2.1HG0023360
HORVU.MOREX.r2.1HG0023430
HORVU.MOREX.r2.1HG0023760
HORVU.MOREX.r2.1HG0023970
HORVU.MOREX.r2.1HG0024040
HORVU.MOREX.r2.1HG0024240
HORVU.MOREX.r2.1HG0024700
HORVU.MOREX.r2.1HG0024740
HORVU.MOREX.r2.1HG0024800
HORVU.MOREX.r2.1HG0025040
HORVU.MOREX.r2.1HG0025270
HORVU.MOREX.r2.1HG0025520
HORVU.MOREX.r2.1HG0025600
HORVU.MOREX.r2.1HG0025640
HORVU.MOREX.r2.1HG0025670
HORVU.MOREX.r2.1HG0025700
HORVU.MOREX.r2.1HG0025750
HORVU.MOREX.r2.1HG0025800
HORVU.MOREX.r2.1HG0025950
HORVU.MOREX.r2.1HG0026080
HORVU.MOREX.r2.1HG0026100
HORVU.MOREX.r2.1HG0026120
HORVU.MOREX.r2.1HG0026140
HORVU.MOREX.r2.1HG0026150
HORVU.MOREX.r2.1HG0026160
HORVU.MOREX.r2.1HG0026350
HORVU.MOREX.r2.1HG0026400
HORVU.MOREX.r2.1HG0026560
HORVU.MOREX.r2.1HG0026610
HORVU.MOREX.r2.1HG0026840
HORVU.MOREX.r2.1HG0027000
HORVU.MOREX.r2.1HG0027100
HORVU.MOREX.r2.1HG0027110
HORVU.MOREX.r2.1HG0027140
HORVU.MOREX.r2.1HG0027180
HORVU.MOREX.r2.1HG0027190
HORVU.MOREX.r2.1HG0027200
HORVU.MOREX.r2.1HG0027350
HORVU.MOREX.r2.1HG0027460
HORVU.MOREX.r2.1HG0027540
HORVU.MOREX.r2.1HG0027550
HORVU.MOREX.r2.1HG0027560
HORVU.MOREX.r2.1HG0027620
HORVU.MOREX.r2.1HG0028190
HORVU.MOREX.r2.1HG0028390
HORVU.MOREX.r2.1HG0028620
HORVU.MOREX.r2.1HG0028700
HORVU.MOREX.r2.1HG0028780
HORVU.MOREX.r2.1HG0028810
HORVU.MOREX.r2.1HG0028950
HORVU.MOREX.r2.1HG0029220
HORVU.MOREX.r2.1HG0029250
HORVU.MOREX.r2.1HG0029530
HORVU.MOREX.r2.1HG0029580
HORVU.MOREX.r2.1HG0029630
HORVU.MOREX.r2.1HG0029650
HORVU.MOREX.r2.1HG0029870
HORVU.MOREX.r2.1HG0029980
HORVU.MOREX.r2.1HG0030110
HORVU.MOREX.r2.1HG0030330
HORVU.MOREX.r2.1HG0030340
HORVU.MOREX.r2.1HG0030770
HORVU.MOREX.r2.1HG0030890
HORVU.MOREX.r2.1HG0031330
HORVU.MOREX.r2.1HG0031440
HORVU.MOREX.r2.1HG0031680
HORVU.MOREX.r2.1HG0031720
HORVU.MOREX.r2.1HG0031750
HORVU.MOREX.r2.1HG0031870
HORVU.MOREX.r2.1HG0032360
HORVU.MOREX.r2.1HG0032530
HORVU.MOREX.r2.1HG0032770
HORVU.MOREX.r2.1HG0032810
HORVU.MOREX.r2.1HG0032840
HORVU.MOREX.r2.1HG0032960
HORVU.MOREX.r2.1HG0033000
HORVU.MOREX.r2.1HG0033180
HORVU.MOREX.r2.1HG0033320
HORVU.MOREX.r2.1HG0033660
HORVU.MOREX.r2.1HG0033790
HORVU.MOREX.r2.1HG0033960
HORVU.MOREX.r2.1HG0034090
HORVU.MOREX.r2.1HG0034100
HORVU.MOREX.r2.1HG0034310
HORVU.MOREX.r2.1HG0034330
HORVU.MOREX.r2.1HG0034380
HORVU.MOREX.r2.1HG0034430
HORVU.MOREX.r2.1HG0034520
HORVU.MOREX.r2.1HG0034560
HORVU.MOREX.r2.1HG0034570
HORVU.MOREX.r2.1HG0034670
HORVU.MOREX.r2.1HG0034680
HORVU.MOREX.r2.1HG0034900
HORVU.MOREX.r2.1HG0034940
HORVU.MOREX.r2.1HG0035660
HORVU.MOREX.r2.1HG0035700
HORVU.MOREX.r2.1HG0035730
HORVU.MOREX.r2.1HG0035740
HORVU.MOREX.r2.1HG0035810
HORVU.MOREX.r2.1HG0035900
HORVU.MOREX.r2.1HG0035910
HORVU.MOREX.r2.1HG0036010
HORVU.MOREX.r2.1HG0036220
HORVU.MOREX.r2.1HG0036240
HORVU.MOREX.r2.1HG0036430
HORVU.MOREX.r2.1HG0036490
HORVU.MOREX.r2.1HG0036560
HORVU.MOREX.r2.1HG0036570
HORVU.MOREX.r2.1HG0036690
HORVU.MOREX.r2.1HG0036700
HORVU.MOREX.r2.1HG0036770
HORVU.MOREX.r2.1HG0036790
HORVU.MOREX.r2.1HG0037080
HORVU.MOREX.r2.1HG0037140
HORVU.MOREX.r2.1HG0037230
HORVU.MOREX.r2.1HG0037340
HORVU.MOREX.r2.1HG0037400
HORVU.MOREX.r2.1HG0037430
HORVU.MOREX.r2.1HG0037450
HORVU.MOREX.r2.1HG0037470
HORVU.MOREX.r2.1HG0037780
HORVU.MOREX.r2.1HG0037930
HORVU.MOREX.r2.1HG0038020
HORVU.MOREX.r2.1HG0038160
HORVU.MOREX.r2.1HG0038330
HORVU.MOREX.r2.1HG0038350
HORVU.MOREX.r2.1HG0038370
HORVU.MOREX.r2.1HG0038510
HORVU.MOREX.r2.1HG0038650
HORVU.MOREX.r2.1HG0038670
HORVU.MOREX.r2.1HG0038680
HORVU.MOREX.r2.1HG0038800
HORVU.MOREX.r2.1HG0038860
HORVU.MOREX.r2.1HG0038870
HORVU.MOREX.r2.1HG0039120
HORVU.MOREX.r2.1HG0039140
HORVU.MOREX.r2.1HG0039160
HORVU.MOREX.r2.1HG0039180
HORVU.MOREX.r2.1HG0039270
HORVU.MOREX.r2.1HG0039530
HORVU.MOREX.r2.1HG0039590
HORVU.MOREX.r2.1HG0039610
HORVU.MOREX.r2.1HG0039630
HORVU.MOREX.r2.1HG0039700
HORVU.MOREX.r2.1HG0039750
HORVU.MOREX.r2.1HG0039760
HORVU.MOREX.r2.1HG0039770
HORVU.MOREX.r2.1HG0039980
HORVU.MOREX.r2.1HG0040000
HORVU.MOREX.r2.1HG0040010
HORVU.MOREX.r2.1HG0040340
HORVU.MOREX.r2.1HG0040430
HORVU.MOREX.r2.1HG0040630
HORVU.MOREX.r2.1HG0040780
HORVU.MOREX.r2.1HG0040820
HORVU.MOREX.r2.1HG0041020
HORVU.MOREX.r2.1HG0041220
HORVU.MOREX.r2.1HG0041250
HORVU.MOREX.r2.1HG0041260
HORVU.MOREX.r2.1HG0041330
HORVU.MOREX.r2.1HG0041390
HORVU.MOREX.r2.1HG0041400
HORVU.MOREX.r2.1HG0041430
HORVU.MOREX.r2.1HG0041530
HORVU.MOREX.r2.1HG0041570
HORVU.MOREX.r2.1HG0041630
HORVU.MOREX.r2.1HG0041690
HORVU.MOREX.r2.1HG0041750
HORVU.MOREX.r2.1HG0041770
HORVU.MOREX.r2.1HG0041780
HORVU.MOREX.r2.1HG0041800
HORVU.MOREX.r2.1HG0041840
HORVU.MOREX.r2.1HG0041900
HORVU.MOREX.r2.1HG0041930
HORVU.MOREX.r2.1HG0041950
HORVU.MOREX.r2.1HG0041980
HORVU.MOREX.r2.1HG0042020
HORVU.MOREX.r2.1HG0042030
HORVU.MOREX.r2.1HG0042180
HORVU.MOREX.r2.1HG0042190
HORVU.MOREX.r2.1HG0042260
HORVU.MOREX.r2.1HG0042270
HORVU.MOREX.r2.1HG0042350
HORVU.MOREX.r2.1HG0042370
HORVU.MOREX.r2.1HG0042520
HORVU.MOREX.r2.1HG0042790
HORVU.MOREX.r2.1HG0042840
HORVU.MOREX.r2.1HG0042860
HORVU.MOREX.r2.1HG0043170
HORVU.MOREX.r2.1HG0043180
HORVU.MOREX.r2.1HG0043540
HORVU.MOREX.r2.1HG0043610
HORVU.MOREX.r2.1HG0043700
HORVU.MOREX.r2.1HG0043760
HORVU.MOREX.r2.1HG0043860
HORVU.MOREX.r2.1HG0044130
HORVU.MOREX.r2.1HG0044140
HORVU.MOREX.r2.1HG0044330
HORVU.MOREX.r2.1HG0044470
HORVU.MOREX.r2.1HG0044550
HORVU.MOREX.r2.1HG0044670
HORVU.MOREX.r2.1HG0044700
HORVU.MOREX.r2.1HG0044740
HORVU.MOREX.r2.1HG0044760
HORVU.MOREX.r2.1HG0044790
HORVU.MOREX.r2.1HG0044930
HORVU.MOREX.r2.1HG0044960
HORVU.MOREX.r2.1HG0044990
HORVU.MOREX.r2.1HG0045370
HORVU.MOREX.r2.1HG0045400
HORVU.MOREX.r2.1HG0045430
HORVU.MOREX.r2.1HG0045490
HORVU.MOREX.r2.1HG0045510
HORVU.MOREX.r2.1HG0045580
HORVU.MOREX.r2.1HG0045690
HORVU.MOREX.r2.1HG0045700
HORVU.MOREX.r2.1HG0045830
HORVU.MOREX.r2.1HG0045900
HORVU.MOREX.r2.1HG0046110
HORVU.MOREX.r2.1HG0046120
HORVU.MOREX.r2.1HG0046130
HORVU.MOREX.r2.1HG0046170
HORVU.MOREX.r2.1HG0046200
HORVU.MOREX.r2.1HG0046280
HORVU.MOREX.r2.1HG0046310
HORVU.MOREX.r2.1HG0046450
HORVU.MOREX.r2.1HG0046590
HORVU.MOREX.r2.1HG0046650
HORVU.MOREX.r2.1HG0046680
HORVU.MOREX.r2.1HG0046730
HORVU.MOREX.r2.1HG0046780
HORVU.MOREX.r2.1HG0046860
HORVU.MOREX.r2.1HG0046940
HORVU.MOREX.r2.1HG0046960
HORVU.MOREX.r2.1HG0047430
HORVU.MOREX.r2.1HG0047480
HORVU.MOREX.r2.1HG0047490
HORVU.MOREX.r2.1HG0047510
HORVU.MOREX.r2.1HG0047530
HORVU.MOREX.r2.1HG0047600
HORVU.MOREX.r2.1HG0047660
HORVU.MOREX.r2.1HG0047840
HORVU.MOREX.r2.1HG0047850
HORVU.MOREX.r2.1HG0048000
HORVU.MOREX.r2.1HG0048170
HORVU.MOREX.r2.1HG0048180
HORVU.MOREX.r2.1HG0048640
HORVU.MOREX.r2.1HG0048660
HORVU.MOREX.r2.1HG0048720
HORVU.MOREX.r2.1HG0048790
HORVU.MOREX.r2.1HG0048820
HORVU.MOREX.r2.1HG0048880
HORVU.MOREX.r2.1HG0048990
HORVU.MOREX.r2.1HG0049160
HORVU.MOREX.r2.1HG0049300
HORVU.MOREX.r2.1HG0049330
HORVU.MOREX.r2.1HG0049380
HORVU.MOREX.r2.1HG0049550
HORVU.MOREX.r2.1HG0049580
HORVU.MOREX.r2.1HG0049610
HORVU.MOREX.r2.1HG0049700
HORVU.MOREX.r2.1HG0049760
HORVU.MOREX.r2.1HG0049800
HORVU.MOREX.r2.1HG0049830
HORVU.MOREX.r2.1HG0049920
HORVU.MOREX.r2.1HG0049930
HORVU.MOREX.r2.1HG0050050
HORVU.MOREX.r2.1HG0050110
HORVU.MOREX.r2.1HG0050390
HORVU.MOREX.r2.1HG0050400
HORVU.MOREX.r2.1HG0050540
HORVU.MOREX.r2.1HG0050560
HORVU.MOREX.r2.1HG0050720
HORVU.MOREX.r2.1HG0050830
HORVU.MOREX.r2.1HG0050860
HORVU.MOREX.r2.1HG0051240
HORVU.MOREX.r2.1HG0051260
HORVU.MOREX.r2.1HG0051300
HORVU.MOREX.r2.1HG0051370
HORVU.MOREX.r2.1HG0051390
HORVU.MOREX.r2.1HG0051400
HORVU.MOREX.r2.1HG0051580
HORVU.MOREX.r2.1HG0051730
HORVU.MOREX.r2.1HG0051760
HORVU.MOREX.r2.1HG0051800
HORVU.MOREX.r2.1HG0051910
HORVU.MOREX.r2.1HG0051960
HORVU.MOREX.r2.1HG0052170
HORVU.MOREX.r2.1HG0052210
HORVU.MOREX.r2.1HG0052620
HORVU.MOREX.r2.1HG0052630
HORVU.MOREX.r2.1HG0052720
HORVU.MOREX.r2.1HG0052730
HORVU.MOREX.r2.1HG0052890
HORVU.MOREX.r2.1HG0052930
HORVU.MOREX.r2.1HG0052970
HORVU.MOREX.r2.1HG0053120
HORVU.MOREX.r2.1HG0053540
HORVU.MOREX.r2.1HG0053580
HORVU.MOREX.r2.1HG0053820
HORVU.MOREX.r2.1HG0053830
HORVU.MOREX.r2.1HG0053900
HORVU.MOREX.r2.1HG0053940
HORVU.MOREX.r2.1HG0054110
HORVU.MOREX.r2.1HG0054270
HORVU.MOREX.r2.1HG0054280
HORVU.MOREX.r2.1HG0054590
HORVU.MOREX.r2.1HG0054640
HORVU.MOREX.r2.1HG0054680
HORVU.MOREX.r2.1HG0055180
HORVU.MOREX.r2.1HG0055270
HORVU.MOREX.r2.1HG0055320
HORVU.MOREX.r2.1HG0055330
HORVU.MOREX.r2.1HG0055400
HORVU.MOREX.r2.1HG0055470
HORVU.MOREX.r2.1HG0055530
HORVU.MOREX.r2.1HG0055630
HORVU.MOREX.r2.1HG0055660
HORVU.MOREX.r2.1HG0055710
HORVU.MOREX.r2.1HG0055730
HORVU.MOREX.r2.1HG0055790
HORVU.MOREX.r2.1HG0055950
HORVU.MOREX.r2.1HG0055960
HORVU.MOREX.r2.1HG0056190
HORVU.MOREX.r2.1HG0056220
HORVU.MOREX.r2.1HG0056230
HORVU.MOREX.r2.1HG0056280
HORVU.MOREX.r2.1HG0056310
HORVU.MOREX.r2.1HG0056360
HORVU.MOREX.r2.1HG0056370
HORVU.MOREX.r2.1HG0056380
HORVU.MOREX.r2.1HG0056730
HORVU.MOREX.r2.1HG0056760
HORVU.MOREX.r2.1HG0056970
HORVU.MOREX.r2.1HG0057120
HORVU.MOREX.r2.1HG0057210
HORVU.MOREX.r2.1HG0057610
HORVU.MOREX.r2.1HG0057640
HORVU.MOREX.r2.1HG0057650
HORVU.MOREX.r2.1HG0057780
HORVU.MOREX.r2.1HG0057800
HORVU.MOREX.r2.1HG0057950
HORVU.MOREX.r2.1HG0058210
HORVU.MOREX.r2.1HG0058340
HORVU.MOREX.r2.1HG0058390
HORVU.MOREX.r2.1HG0058460
HORVU.MOREX.r2.1HG0058740
HORVU.MOREX.r2.1HG0058760
HORVU.MOREX.r2.1HG0058810
HORVU.MOREX.r2.1HG0058820
HORVU.MOREX.r2.1HG0058830
HORVU.MOREX.r2.1HG0058840
HORVU.MOREX.r2.1HG0059040
HORVU.MOREX.r2.1HG0059100
HORVU.MOREX.r2.1HG0059290
HORVU.MOREX.r2.1HG0059730
HORVU.MOREX.r2.1HG0059760
HORVU.MOREX.r2.1HG0059780
HORVU.MOREX.r2.1HG0059850
HORVU.MOREX.r2.1HG0059910
HORVU.MOREX.r2.1HG0059970
HORVU.MOREX.r2.1HG0059980
HORVU.MOREX.r2.1HG0059990
HORVU.MOREX.r2.1HG0060000
HORVU.MOREX.r2.1HG0060280
HORVU.MOREX.r2.1HG0060380
HORVU.MOREX.r2.1HG0060420
HORVU.MOREX.r2.1HG0060720
HORVU.MOREX.r2.1HG0060770
HORVU.MOREX.r2.1HG0060970
HORVU.MOREX.r2.1HG0061060
HORVU.MOREX.r2.1HG0061100
HORVU.MOREX.r2.1HG0061110
HORVU.MOREX.r2.1HG0061200
HORVU.MOREX.r2.1HG0061240
HORVU.MOREX.r2.1HG0061250
HORVU.MOREX.r2.1HG0061320
HORVU.MOREX.r2.1HG0061420
HORVU.MOREX.r2.1HG0061440
HORVU.MOREX.r2.1HG0061480
HORVU.MOREX.r2.1HG0062040
HORVU.MOREX.r2.1HG0062050
HORVU.MOREX.r2.1HG0062060
HORVU.MOREX.r2.1HG0062100
HORVU.MOREX.r2.1HG0062140
HORVU.MOREX.r2.1HG0062240
HORVU.MOREX.r2.1HG0062350
HORVU.MOREX.r2.1HG0062430
HORVU.MOREX.r2.1HG0062540
HORVU.MOREX.r2.1HG0062660
HORVU.MOREX.r2.1HG0062690
HORVU.MOREX.r2.1HG0062770
HORVU.MOREX.r2.1HG0062850
HORVU.MOREX.r2.1HG0063050
HORVU.MOREX.r2.1HG0063060
HORVU.MOREX.r2.1HG0063090
HORVU.MOREX.r2.1HG0063120
HORVU.MOREX.r2.1HG0063130
HORVU.MOREX.r2.1HG0063230
HORVU.MOREX.r2.1HG0063320
HORVU.MOREX.r2.1HG0063350
HORVU.MOREX.r2.1HG0063550
HORVU.MOREX.r2.1HG0063570
HORVU.MOREX.r2.1HG0063590
HORVU.MOREX.r2.1HG0063810
HORVU.MOREX.r2.1HG0063950
HORVU.MOREX.r2.1HG0063960
HORVU.MOREX.r2.1HG0064110
HORVU.MOREX.r2.1HG0064120
HORVU.MOREX.r2.1HG0064170
HORVU.MOREX.r2.1HG0064380
HORVU.MOREX.r2.1HG0064390
HORVU.MOREX.r2.1HG0064410
HORVU.MOREX.r2.1HG0064460
HORVU.MOREX.r2.1HG0064470
HORVU.MOREX.r2.1HG0064580
HORVU.MOREX.r2.1HG0064910
HORVU.MOREX.r2.1HG0064930
HORVU.MOREX.r2.1HG0065070
HORVU.MOREX.r2.1HG0065120
HORVU.MOREX.r2.1HG0065140
HORVU.MOREX.r2.1HG0065170
HORVU.MOREX.r2.1HG0065190
HORVU.MOREX.r2.1HG0065200
HORVU.MOREX.r2.1HG0065470
HORVU.MOREX.r2.1HG0065510
HORVU.MOREX.r2.1HG0065590
HORVU.MOREX.r2.1HG0065680
HORVU.MOREX.r2.1HG0065700
HORVU.MOREX.r2.1HG0065900
HORVU.MOREX.r2.1HG0065920
HORVU.MOREX.r2.1HG0065930
HORVU.MOREX.r2.1HG0066040
HORVU.MOREX.r2.1HG0066090
HORVU.MOREX.r2.1HG0066110
HORVU.MOREX.r2.1HG0066270
HORVU.MOREX.r2.1HG0066370
HORVU.MOREX.r2.1HG0066380
HORVU.MOREX.r2.1HG0066390
HORVU.MOREX.r2.1HG0066640
HORVU.MOREX.r2.1HG0066670
HORVU.MOREX.r2.1HG0066820
HORVU.MOREX.r2.1HG0066830
HORVU.MOREX.r2.1HG0066930
HORVU.MOREX.r2.1HG0066980
HORVU.MOREX.r2.1HG0067040
HORVU.MOREX.r2.1HG0067180
HORVU.MOREX.r2.1HG0067190
HORVU.MOREX.r2.1HG0067250
HORVU.MOREX.r2.1HG0067380
HORVU.MOREX.r2.1HG0067660
HORVU.MOREX.r2.1HG0067720
HORVU.MOREX.r2.1HG0067760
HORVU.MOREX.r2.1HG0067770
HORVU.MOREX.r2.1HG0067880
HORVU.MOREX.r2.1HG0067910
HORVU.MOREX.r2.1HG0067920
HORVU.MOREX.r2.1HG0067960
HORVU.MOREX.r2.1HG0068370
HORVU.MOREX.r2.1HG0068540
HORVU.MOREX.r2.1HG0068720
HORVU.MOREX.r2.1HG0068730
HORVU.MOREX.r2.1HG0068990
HORVU.MOREX.r2.1HG0069010
HORVU.MOREX.r2.1HG0069030
HORVU.MOREX.r2.1HG0069320
HORVU.MOREX.r2.1HG0069360
HORVU.MOREX.r2.1HG0069410
HORVU.MOREX.r2.1HG0069480
HORVU.MOREX.r2.1HG0069590
HORVU.MOREX.r2.1HG0069830
HORVU.MOREX.r2.1HG0069850
HORVU.MOREX.r2.1HG0070060
HORVU.MOREX.r2.1HG0070120
HORVU.MOREX.r2.1HG0070320
HORVU.MOREX.r2.1HG0070800
HORVU.MOREX.r2.1HG0070810
HORVU.MOREX.r2.1HG0070820
HORVU.MOREX.r2.1HG0070900
HORVU.MOREX.r2.1HG0071140
HORVU.MOREX.r2.1HG0071160
HORVU.MOREX.r2.1HG0071210
HORVU.MOREX.r2.1HG0071380
HORVU.MOREX.r2.1HG0071820
HORVU.MOREX.r2.1HG0071970
HORVU.MOREX.r2.1HG0072040
HORVU.MOREX.r2.1HG0072150
HORVU.MOREX.r2.1HG0072260
HORVU.MOREX.r2.1HG0072300
HORVU.MOREX.r2.1HG0072350
HORVU.MOREX.r2.1HG0072380
HORVU.MOREX.r2.1HG0072490
HORVU.MOREX.r2.1HG0072930
HORVU.MOREX.r2.1HG0072940
HORVU.MOREX.r2.1HG0072950
HORVU.MOREX.r2.1HG0073100
HORVU.MOREX.r2.1HG0073300
HORVU.MOREX.r2.1HG0073390
HORVU.MOREX.r2.1HG0073430
HORVU.MOREX.r2.1HG0073710
HORVU.MOREX.r2.1HG0073880
HORVU.MOREX.r2.1HG0073990
HORVU.MOREX.r2.1HG0074020
HORVU.MOREX.r2.1HG0074050
HORVU.MOREX.r2.1HG0074260
HORVU.MOREX.r2.1HG0074270
HORVU.MOREX.r2.1HG0074340
HORVU.MOREX.r2.1HG0074420
HORVU.MOREX.r2.1HG0074470
HORVU.MOREX.r2.1HG0074530
HORVU.MOREX.r2.1HG0074570
HORVU.MOREX.r2.1HG0074590
HORVU.MOREX.r2.1HG0074710
HORVU.MOREX.r2.1HG0074840
HORVU.MOREX.r2.1HG0074850
HORVU.MOREX.r2.1HG0074870
HORVU.MOREX.r2.1HG0074920
HORVU.MOREX.r2.1HG0074930
HORVU.MOREX.r2.1HG0075070
HORVU.MOREX.r2.1HG0075130
HORVU.MOREX.r2.1HG0075200
HORVU.MOREX.r2.1HG0075260
HORVU.MOREX.r2.1HG0075280
HORVU.MOREX.r2.1HG0075300
HORVU.MOREX.r2.1HG0075390
HORVU.MOREX.r2.1HG0075630
HORVU.MOREX.r2.1HG0075760
HORVU.MOREX.r2.1HG0075780
HORVU.MOREX.r2.1HG0075820
HORVU.MOREX.r2.1HG0075880
HORVU.MOREX.r2.1HG0076230
HORVU.MOREX.r2.1HG0076310
HORVU.MOREX.r2.1HG0076500
HORVU.MOREX.r2.1HG0076570
HORVU.MOREX.r2.1HG0076670
HORVU.MOREX.r2.1HG0076680
HORVU.MOREX.r2.1HG0076730
HORVU.MOREX.r2.1HG0076850
HORVU.MOREX.r2.1HG0076960
HORVU.MOREX.r2.1HG0077180
HORVU.MOREX.r2.1HG0077230
HORVU.MOREX.r2.1HG0077250
HORVU.MOREX.r2.1HG0077280
HORVU.MOREX.r2.1HG0077300
HORVU.MOREX.r2.1HG0077340
HORVU.MOREX.r2.1HG0077400
HORVU.MOREX.r2.1HG0077430
HORVU.MOREX.r2.1HG0077870
HORVU.MOREX.r2.1HG0078000
HORVU.MOREX.r2.1HG0078090
HORVU.MOREX.r2.1HG0078230
HORVU.MOREX.r2.1HG0078310
HORVU.MOREX.r2.1HG0078320
HORVU.MOREX.r2.1HG0078340
HORVU.MOREX.r2.1HG0078350
HORVU.MOREX.r2.1HG0078390
HORVU.MOREX.r2.1HG0078430
HORVU.MOREX.r2.1HG0078560
HORVU.MOREX.r2.1HG0078570
HORVU.MOREX.r2.1HG0078610
HORVU.MOREX.r2.1HG0078630
HORVU.MOREX.r2.1HG0078660
HORVU.MOREX.r2.1HG0078740
HORVU.MOREX.r2.2HG0078890
HORVU.MOREX.r2.2HG0078940
HORVU.MOREX.r2.2HG0079060
HORVU.MOREX.r2.2HG0079230
HORVU.MOREX.r2.2HG0079560
HORVU.MOREX.r2.2HG0079620
HORVU.MOREX.r2.2HG0079630
HORVU.MOREX.r2.2HG0079670
HORVU.MOREX.r2.2HG0079710
HORVU.MOREX.r2.2HG0079740
HORVU.MOREX.r2.2HG0079750
HORVU.MOREX.r2.2HG0079820
HORVU.MOREX.r2.2HG0080000
HORVU.MOREX.r2.2HG0080040
HORVU.MOREX.r2.2HG0080240
HORVU.MOREX.r2.2HG0080730
HORVU.MOREX.r2.2HG0080870
HORVU.MOREX.r2.2HG0080930
HORVU.MOREX.r2.2HG0081060
HORVU.MOREX.r2.2HG0081260
HORVU.MOREX.r2.2HG0081290
HORVU.MOREX.r2.2HG0081300
HORVU.MOREX.r2.2HG0081500
HORVU.MOREX.r2.2HG0081520
HORVU.MOREX.r2.2HG0081760
HORVU.MOREX.r2.2HG0081770
HORVU.MOREX.r2.2HG0081780
HORVU.MOREX.r2.2HG0082250
HORVU.MOREX.r2.2HG0082320
HORVU.MOREX.r2.2HG0082370
HORVU.MOREX.r2.2HG0082400
HORVU.MOREX.r2.2HG0082640
HORVU.MOREX.r2.2HG0082790
HORVU.MOREX.r2.2HG0083020
HORVU.MOREX.r2.2HG0083180
HORVU.MOREX.r2.2HG0083460
HORVU.MOREX.r2.2HG0083490
HORVU.MOREX.r2.2HG0083500
HORVU.MOREX.r2.2HG0083630
HORVU.MOREX.r2.2HG0084300
HORVU.MOREX.r2.2HG0084400
HORVU.MOREX.r2.2HG0084440
HORVU.MOREX.r2.2HG0084620
HORVU.MOREX.r2.2HG0085290
HORVU.MOREX.r2.2HG0085540
HORVU.MOREX.r2.2HG0085750
HORVU.MOREX.r2.2HG0085830
HORVU.MOREX.r2.2HG0085840
HORVU.MOREX.r2.2HG0085880
HORVU.MOREX.r2.2HG0085890
HORVU.MOREX.r2.2HG0085900
HORVU.MOREX.r2.2HG0085910
HORVU.MOREX.r2.2HG0085920
HORVU.MOREX.r2.2HG0085930
HORVU.MOREX.r2.2HG0085990
HORVU.MOREX.r2.2HG0086160
HORVU.MOREX.r2.2HG0086340
HORVU.MOREX.r2.2HG0086400
HORVU.MOREX.r2.2HG0086410
HORVU.MOREX.r2.2HG0086490
HORVU.MOREX.r2.2HG0086560
HORVU.MOREX.r2.2HG0086730
HORVU.MOREX.r2.2HG0087070
HORVU.MOREX.r2.2HG0087210
HORVU.MOREX.r2.2HG0087370
HORVU.MOREX.r2.2HG0087480
HORVU.MOREX.r2.2HG0088000
HORVU.MOREX.r2.2HG0088030
HORVU.MOREX.r2.2HG0088180
HORVU.MOREX.r2.2HG0088270
HORVU.MOREX.r2.2HG0088320
HORVU.MOREX.r2.2HG0088330
HORVU.MOREX.r2.2HG0088440
HORVU.MOREX.r2.2HG0088510
HORVU.MOREX.r2.2HG0088660
HORVU.MOREX.r2.2HG0088730
HORVU.MOREX.r2.2HG0088780
HORVU.MOREX.r2.2HG0088840
HORVU.MOREX.r2.2HG0089210
HORVU.MOREX.r2.2HG0089230
HORVU.MOREX.r2.2HG0089240
HORVU.MOREX.r2.2HG0089330
HORVU.MOREX.r2.2HG0089710
HORVU.MOREX.r2.2HG0089740
HORVU.MOREX.r2.2HG0090020
HORVU.MOREX.r2.2HG0090250
HORVU.MOREX.r2.2HG0090260
HORVU.MOREX.r2.2HG0090280
HORVU.MOREX.r2.2HG0090320
HORVU.MOREX.r2.2HG0090510
HORVU.MOREX.r2.2HG0090830
HORVU.MOREX.r2.2HG0090840
HORVU.MOREX.r2.2HG0090850
HORVU.MOREX.r2.2HG0090870
HORVU.MOREX.r2.2HG0091190
HORVU.MOREX.r2.2HG0091470
HORVU.MOREX.r2.2HG0091540
HORVU.MOREX.r2.2HG0091650
HORVU.MOREX.r2.2HG0091770
HORVU.MOREX.r2.2HG0091800
HORVU.MOREX.r2.2HG0091910
HORVU.MOREX.r2.2HG0091950
HORVU.MOREX.r2.2HG0091980
HORVU.MOREX.r2.2HG0092100
HORVU.MOREX.r2.2HG0092260
HORVU.MOREX.r2.2HG0092670
HORVU.MOREX.r2.2HG0092980
HORVU.MOREX.r2.2HG0092990
HORVU.MOREX.r2.2HG0093150
HORVU.MOREX.r2.2HG0093290
HORVU.MOREX.r2.2HG0093320
HORVU.MOREX.r2.2HG0093330
HORVU.MOREX.r2.2HG0093360
HORVU.MOREX.r2.2HG0093490
HORVU.MOREX.r2.2HG0093570
HORVU.MOREX.r2.2HG0093580
HORVU.MOREX.r2.2HG0093880
HORVU.MOREX.r2.2HG0093910
HORVU.MOREX.r2.2HG0093920
HORVU.MOREX.r2.2HG0093960
HORVU.MOREX.r2.2HG0094250
HORVU.MOREX.r2.2HG0094260
HORVU.MOREX.r2.2HG0094340
HORVU.MOREX.r2.2HG0094490
HORVU.MOREX.r2.2HG0094840
HORVU.MOREX.r2.2HG0094850
HORVU.MOREX.r2.2HG0094880
HORVU.MOREX.r2.2HG0095170
HORVU.MOREX.r2.2HG0095180
HORVU.MOREX.r2.2HG0095190
HORVU.MOREX.r2.2HG0095380
HORVU.MOREX.r2.2HG0095480
HORVU.MOREX.r2.2HG0095500
HORVU.MOREX.r2.2HG0095580
HORVU.MOREX.r2.2HG0095650
HORVU.MOREX.r2.2HG0095670
HORVU.MOREX.r2.2HG0095680
HORVU.MOREX.r2.2HG0095690
HORVU.MOREX.r2.2HG0095710
HORVU.MOREX.r2.2HG0095720
HORVU.MOREX.r2.2HG0095820
HORVU.MOREX.r2.2HG0095910
HORVU.MOREX.r2.2HG0095970
HORVU.MOREX.r2.2HG0096090
HORVU.MOREX.r2.2HG0096290
HORVU.MOREX.r2.2HG0096310
HORVU.MOREX.r2.2HG0096330
HORVU.MOREX.r2.2HG0096400
HORVU.MOREX.r2.2HG0096490
HORVU.MOREX.r2.2HG0096600
HORVU.MOREX.r2.2HG0097190
HORVU.MOREX.r2.2HG0097480
HORVU.MOREX.r2.2HG0097490
HORVU.MOREX.r2.2HG0097580
HORVU.MOREX.r2.2HG0097590
HORVU.MOREX.r2.2HG0097680
HORVU.MOREX.r2.2HG0097920
HORVU.MOREX.r2.2HG0098010
HORVU.MOREX.r2.2HG0098050
HORVU.MOREX.r2.2HG0098140
HORVU.MOREX.r2.2HG0098230
HORVU.MOREX.r2.2HG0098330
HORVU.MOREX.r2.2HG0098350
HORVU.MOREX.r2.2HG0098430
HORVU.MOREX.r2.2HG0098520
HORVU.MOREX.r2.2HG0098580
HORVU.MOREX.r2.2HG0098610
HORVU.MOREX.r2.2HG0098630
HORVU.MOREX.r2.2HG0098660
HORVU.MOREX.r2.2HG0098700
HORVU.MOREX.r2.2HG0098710
HORVU.MOREX.r2.2HG0098730
HORVU.MOREX.r2.2HG0098980
HORVU.MOREX.r2.2HG0099010
HORVU.MOREX.r2.2HG0099550
HORVU.MOREX.r2.2HG0099720
HORVU.MOREX.r2.2HG0099730
HORVU.MOREX.r2.2HG0099840
HORVU.MOREX.r2.2HG0099970
HORVU.MOREX.r2.2HG0100170
HORVU.MOREX.r2.2HG0100220
HORVU.MOREX.r2.2HG0100310
HORVU.MOREX.r2.2HG0100380
HORVU.MOREX.r2.2HG0100410
HORVU.MOREX.r2.2HG0100580
HORVU.MOREX.r2.2HG0100610
HORVU.MOREX.r2.2HG0100650
HORVU.MOREX.r2.2HG0100760
HORVU.MOREX.r2.2HG0100790
HORVU.MOREX.r2.2HG0100900
HORVU.MOREX.r2.2HG0100940
HORVU.MOREX.r2.2HG0100960
HORVU.MOREX.r2.2HG0101090
HORVU.MOREX.r2.2HG0101560
HORVU.MOREX.r2.2HG0101800
HORVU.MOREX.r2.2HG0101820
HORVU.MOREX.r2.2HG0101880
HORVU.MOREX.r2.2HG0102010
HORVU.MOREX.r2.2HG0102020
HORVU.MOREX.r2.2HG0102030
HORVU.MOREX.r2.2HG0102050
HORVU.MOREX.r2.2HG0102180
HORVU.MOREX.r2.2HG0102190
HORVU.MOREX.r2.2HG0102260
HORVU.MOREX.r2.2HG0102270
HORVU.MOREX.r2.2HG0102520
HORVU.MOREX.r2.2HG0102830
HORVU.MOREX.r2.2HG0102840
HORVU.MOREX.r2.2HG0102860
HORVU.MOREX.r2.2HG0102880
HORVU.MOREX.r2.2HG0102980
HORVU.MOREX.r2.2HG0103090
HORVU.MOREX.r2.2HG0103410
HORVU.MOREX.r2.2HG0103530
HORVU.MOREX.r2.2HG0103930
HORVU.MOREX.r2.2HG0104220
HORVU.MOREX.r2.2HG0104300
HORVU.MOREX.r2.2HG0104620
HORVU.MOREX.r2.2HG0104700
HORVU.MOREX.r2.2HG0104900
HORVU.MOREX.r2.2HG0104910
HORVU.MOREX.r2.2HG0104920
HORVU.MOREX.r2.2HG0105110
HORVU.MOREX.r2.2HG0105170
HORVU.MOREX.r2.2HG0105320
HORVU.MOREX.r2.2HG0105500
HORVU.MOREX.r2.2HG0105540
HORVU.MOREX.r2.2HG0105800
HORVU.MOREX.r2.2HG0105820
HORVU.MOREX.r2.2HG0105890
HORVU.MOREX.r2.2HG0106100
HORVU.MOREX.r2.2HG0106180
HORVU.MOREX.r2.2HG0106200
HORVU.MOREX.r2.2HG0106300
HORVU.MOREX.r2.2HG0106400
HORVU.MOREX.r2.2HG0106430
HORVU.MOREX.r2.2HG0106890
HORVU.MOREX.r2.2HG0107040
HORVU.MOREX.r2.2HG0107070
HORVU.MOREX.r2.2HG0107100
HORVU.MOREX.r2.2HG0107290
HORVU.MOREX.r2.2HG0107450
HORVU.MOREX.r2.2HG0107550
HORVU.MOREX.r2.2HG0107630
HORVU.MOREX.r2.2HG0107740
HORVU.MOREX.r2.2HG0107870
HORVU.MOREX.r2.2HG0107970
HORVU.MOREX.r2.2HG0108000
HORVU.MOREX.r2.2HG0108030
HORVU.MOREX.r2.2HG0108130
HORVU.MOREX.r2.2HG0108310
HORVU.MOREX.r2.2HG0108340
HORVU.MOREX.r2.2HG0108430
HORVU.MOREX.r2.2HG0108530
HORVU.MOREX.r2.2HG0108900
HORVU.MOREX.r2.2HG0109030
HORVU.MOREX.r2.2HG0109070
HORVU.MOREX.r2.2HG0109090
HORVU.MOREX.r2.2HG0109310
HORVU.MOREX.r2.2HG0109460
HORVU.MOREX.r2.2HG0109550
HORVU.MOREX.r2.2HG0109620
HORVU.MOREX.r2.2HG0109660
HORVU.MOREX.r2.2HG0109750
HORVU.MOREX.r2.2HG0109780
HORVU.MOREX.r2.2HG0109930
HORVU.MOREX.r2.2HG0109980
HORVU.MOREX.r2.2HG0110010
HORVU.MOREX.r2.2HG0110070
HORVU.MOREX.r2.2HG0110100
HORVU.MOREX.r2.2HG0110160
HORVU.MOREX.r2.2HG0110310
HORVU.MOREX.r2.2HG0110360
HORVU.MOREX.r2.2HG0110620
HORVU.MOREX.r2.2HG0110630
HORVU.MOREX.r2.2HG0110730
HORVU.MOREX.r2.2HG0110760
HORVU.MOREX.r2.2HG0111000
HORVU.MOREX.r2.2HG0111060
HORVU.MOREX.r2.2HG0111210
HORVU.MOREX.r2.2HG0111470
HORVU.MOREX.r2.2HG0111730
HORVU.MOREX.r2.2HG0111810
HORVU.MOREX.r2.2HG0111830
HORVU.MOREX.r2.2HG0111890
HORVU.MOREX.r2.2HG0111900
HORVU.MOREX.r2.2HG0111920
HORVU.MOREX.r2.2HG0112150
HORVU.MOREX.r2.2HG0112310
HORVU.MOREX.r2.2HG0112400
HORVU.MOREX.r2.2HG0112480
HORVU.MOREX.r2.2HG0112510
HORVU.MOREX.r2.2HG0112770
HORVU.MOREX.r2.2HG0112970
HORVU.MOREX.r2.2HG0113030
HORVU.MOREX.r2.2HG0113090
HORVU.MOREX.r2.2HG0113300
HORVU.MOREX.r2.2HG0113830
HORVU.MOREX.r2.2HG0113930
HORVU.MOREX.r2.2HG0114190
HORVU.MOREX.r2.2HG0114730
HORVU.MOREX.r2.2HG0114750
HORVU.MOREX.r2.2HG0114770
HORVU.MOREX.r2.2HG0114780
HORVU.MOREX.r2.2HG0114790
HORVU.MOREX.r2.2HG0115110
HORVU.MOREX.r2.2HG0115120
HORVU.MOREX.r2.2HG0115300
HORVU.MOREX.r2.2HG0115310
HORVU.MOREX.r2.2HG0115410
HORVU.MOREX.r2.2HG0115420
HORVU.MOREX.r2.2HG0115460
HORVU.MOREX.r2.2HG0115530
HORVU.MOREX.r2.2HG0115550
HORVU.MOREX.r2.2HG0115650
HORVU.MOREX.r2.2HG0115670
HORVU.MOREX.r2.2HG0115680
HORVU.MOREX.r2.2HG0115960
HORVU.MOREX.r2.2HG0116140
HORVU.MOREX.r2.2HG0116450
HORVU.MOREX.r2.2HG0116510
HORVU.MOREX.r2.2HG0116530
HORVU.MOREX.r2.2HG0116760
HORVU.MOREX.r2.2HG0116960
HORVU.MOREX.r2.2HG0117060
HORVU.MOREX.r2.2HG0117130
HORVU.MOREX.r2.2HG0117170
HORVU.MOREX.r2.2HG0117350
HORVU.MOREX.r2.2HG0117370
HORVU.MOREX.r2.2HG0117400
HORVU.MOREX.r2.2HG0117500
HORVU.MOREX.r2.2HG0117550
HORVU.MOREX.r2.2HG0117650
HORVU.MOREX.r2.2HG0118000
HORVU.MOREX.r2.2HG0118360
HORVU.MOREX.r2.2HG0118370
HORVU.MOREX.r2.2HG0118450
HORVU.MOREX.r2.2HG0118680
HORVU.MOREX.r2.2HG0118730
HORVU.MOREX.r2.2HG0118810
HORVU.MOREX.r2.2HG0118970
HORVU.MOREX.r2.2HG0119220
HORVU.MOREX.r2.2HG0119380
HORVU.MOREX.r2.2HG0119390
HORVU.MOREX.r2.2HG0119410
HORVU.MOREX.r2.2HG0119420
HORVU.MOREX.r2.2HG0119520
HORVU.MOREX.r2.2HG0119620
HORVU.MOREX.r2.2HG0119630
HORVU.MOREX.r2.2HG0119800
HORVU.MOREX.r2.2HG0119820
HORVU.MOREX.r2.2HG0119940
HORVU.MOREX.r2.2HG0119970
HORVU.MOREX.r2.2HG0119990
HORVU.MOREX.r2.2HG0120170
HORVU.MOREX.r2.2HG0120240
HORVU.MOREX.r2.2HG0120330
HORVU.MOREX.r2.2HG0120380
HORVU.MOREX.r2.2HG0120510
HORVU.MOREX.r2.2HG0120560
HORVU.MOREX.r2.2HG0120600
HORVU.MOREX.r2.2HG0120910
HORVU.MOREX.r2.2HG0120970
HORVU.MOREX.r2.2HG0121020
HORVU.MOREX.r2.2HG0121050
HORVU.MOREX.r2.2HG0121090
HORVU.MOREX.r2.2HG0121430
HORVU.MOREX.r2.2HG0121490
HORVU.MOREX.r2.2HG0121570
HORVU.MOREX.r2.2HG0121590
HORVU.MOREX.r2.2HG0121930
HORVU.MOREX.r2.2HG0121950
HORVU.MOREX.r2.2HG0122340
HORVU.MOREX.r2.2HG0122350
HORVU.MOREX.r2.2HG0122610
HORVU.MOREX.r2.2HG0122910
HORVU.MOREX.r2.2HG0122960
HORVU.MOREX.r2.2HG0123040
HORVU.MOREX.r2.2HG0123120
HORVU.MOREX.r2.2HG0123500
HORVU.MOREX.r2.2HG0123590
HORVU.MOREX.r2.2HG0123640
HORVU.MOREX.r2.2HG0123740
HORVU.MOREX.r2.2HG0124220
HORVU.MOREX.r2.2HG0124380
HORVU.MOREX.r2.2HG0124630
HORVU.MOREX.r2.2HG0124820
HORVU.MOREX.r2.2HG0125120
HORVU.MOREX.r2.2HG0125150
HORVU.MOREX.r2.2HG0125170
HORVU.MOREX.r2.2HG0125200
HORVU.MOREX.r2.2HG0125210
HORVU.MOREX.r2.2HG0125390
HORVU.MOREX.r2.2HG0125400
HORVU.MOREX.r2.2HG0125780
HORVU.MOREX.r2.2HG0126140
HORVU.MOREX.r2.2HG0126150
HORVU.MOREX.r2.2HG0126160
HORVU.MOREX.r2.2HG0126270
HORVU.MOREX.r2.2HG0126350
HORVU.MOREX.r2.2HG0126470
HORVU.MOREX.r2.2HG0126580
HORVU.MOREX.r2.2HG0126790
HORVU.MOREX.r2.2HG0126800
HORVU.MOREX.r2.2HG0127140
HORVU.MOREX.r2.2HG0127180
HORVU.MOREX.r2.2HG0127380
HORVU.MOREX.r2.2HG0127410
HORVU.MOREX.r2.2HG0127460
HORVU.MOREX.r2.2HG0128020
HORVU.MOREX.r2.2HG0128260
HORVU.MOREX.r2.2HG0128300
HORVU.MOREX.r2.2HG0128450
HORVU.MOREX.r2.2HG0128610
HORVU.MOREX.r2.2HG0128650
HORVU.MOREX.r2.2HG0128880
HORVU.MOREX.r2.2HG0129000
HORVU.MOREX.r2.2HG0129410
HORVU.MOREX.r2.2HG0129420
HORVU.MOREX.r2.2HG0129580
HORVU.MOREX.r2.2HG0129610
HORVU.MOREX.r2.2HG0129810
HORVU.MOREX.r2.2HG0129820
HORVU.MOREX.r2.2HG0129850
HORVU.MOREX.r2.2HG0129900
HORVU.MOREX.r2.2HG0129920
HORVU.MOREX.r2.2HG0130010
HORVU.MOREX.r2.2HG0130180
HORVU.MOREX.r2.2HG0130200
HORVU.MOREX.r2.2HG0130220
HORVU.MOREX.r2.2HG0130470
HORVU.MOREX.r2.2HG0130510
HORVU.MOREX.r2.2HG0130620
HORVU.MOREX.r2.2HG0130740
HORVU.MOREX.r2.2HG0130750
HORVU.MOREX.r2.2HG0130760
HORVU.MOREX.r2.2HG0130820
HORVU.MOREX.r2.2HG0130920
HORVU.MOREX.r2.2HG0131180
HORVU.MOREX.r2.2HG0131440
HORVU.MOREX.r2.2HG0131510
HORVU.MOREX.r2.2HG0131710
HORVU.MOREX.r2.2HG0131720
HORVU.MOREX.r2.2HG0132130
HORVU.MOREX.r2.2HG0132390
HORVU.MOREX.r2.2HG0132430
HORVU.MOREX.r2.2HG0132480
HORVU.MOREX.r2.2HG0132690
HORVU.MOREX.r2.2HG0132760
HORVU.MOREX.r2.2HG0133000
HORVU.MOREX.r2.2HG0133090
HORVU.MOREX.r2.2HG0133110
HORVU.MOREX.r2.2HG0133120
HORVU.MOREX.r2.2HG0133140
HORVU.MOREX.r2.2HG0133290
HORVU.MOREX.r2.2HG0133370
HORVU.MOREX.r2.2HG0133650
HORVU.MOREX.r2.2HG0133660
HORVU.MOREX.r2.2HG0133670
HORVU.MOREX.r2.2HG0133700
HORVU.MOREX.r2.2HG0133980
HORVU.MOREX.r2.2HG0134010
HORVU.MOREX.r2.2HG0134050
HORVU.MOREX.r2.2HG0134200
HORVU.MOREX.r2.2HG0134210
HORVU.MOREX.r2.2HG0134330
HORVU.MOREX.r2.2HG0134360
HORVU.MOREX.r2.2HG0134380
HORVU.MOREX.r2.2HG0134470
HORVU.MOREX.r2.2HG0134610
HORVU.MOREX.r2.2HG0134620
HORVU.MOREX.r2.2HG0134730
HORVU.MOREX.r2.2HG0135050
HORVU.MOREX.r2.2HG0135060
HORVU.MOREX.r2.2HG0135270
HORVU.MOREX.r2.2HG0135360
HORVU.MOREX.r2.2HG0135400
HORVU.MOREX.r2.2HG0135590
HORVU.MOREX.r2.2HG0135600
HORVU.MOREX.r2.2HG0135630
HORVU.MOREX.r2.2HG0135740
HORVU.MOREX.r2.2HG0135950
HORVU.MOREX.r2.2HG0136060
HORVU.MOREX.r2.2HG0136120
HORVU.MOREX.r2.2HG0136230
HORVU.MOREX.r2.2HG0136260
HORVU.MOREX.r2.2HG0136660
HORVU.MOREX.r2.2HG0136690
HORVU.MOREX.r2.2HG0136700
HORVU.MOREX.r2.2HG0136710
HORVU.MOREX.r2.2HG0136750
HORVU.MOREX.r2.2HG0136770
HORVU.MOREX.r2.2HG0137060
HORVU.MOREX.r2.2HG0137280
HORVU.MOREX.r2.2HG0137290
HORVU.MOREX.r2.2HG0137320
HORVU.MOREX.r2.2HG0137360
HORVU.MOREX.r2.2HG0137370
HORVU.MOREX.r2.2HG0137420
HORVU.MOREX.r2.2HG0137450
HORVU.MOREX.r2.2HG0137550
HORVU.MOREX.r2.2HG0137830
HORVU.MOREX.r2.2HG0138050
HORVU.MOREX.r2.2HG0138220
HORVU.MOREX.r2.2HG0138640
HORVU.MOREX.r2.2HG0138650
HORVU.MOREX.r2.2HG0138670
HORVU.MOREX.r2.2HG0138750
HORVU.MOREX.r2.2HG0138790
HORVU.MOREX.r2.2HG0138800
HORVU.MOREX.r2.2HG0138840
HORVU.MOREX.r2.2HG0139120
HORVU.MOREX.r2.2HG0139160
HORVU.MOREX.r2.2HG0139240
HORVU.MOREX.r2.2HG0139320
HORVU.MOREX.r2.2HG0139360
HORVU.MOREX.r2.2HG0139490
[truncated: 10,683 more rows]

## Sheet: Table S8 H3K9ac
Table S8. Genes associated with H3K9ac in D2 (M0vsM2vsD2)
gene ID	annotation
HORVU.MOREX.r2.1HG0038580	1-(5-phosphoribosyl)-5-[(5-phosphoribosylamino)methylideneamino] imidazole-4-carboxamide isomerase
HORVU.MOREX.r2.5HG0366560	1-(5-phosphoribosyl)-5-[(5-phosphoribosylamino)methylideneamino] imidazole-4-carboxamide isomerase
HORVU.MOREX.r2.5HG0376370	1,4-alpha-glucan branching enzyme GlgB
HORVU.MOREX.r2.2HG0136670	1,4-alpha-glucan-branching enzyme
HORVU.MOREX.r2.5HG0418660	11S globulin seed storage protein
HORVU.MOREX.r2.1HG0006250	11S globulin seed storage protein 2
HORVU.MOREX.r2.2HG0081690	12-oxophytodienoate reductase-like protein
HORVU.MOREX.r2.5HG0410170	1-deoxy-D-xylulose 5-phosphate synthase 1
HORVU.MOREX.r2.5HG0390420	2,3-bisphosphoglycerate-dependent phosphoglycerate mutase
HORVU.MOREX.r2.3HG0196110	23S rRNA (Uracil-5-)-methyltransferase
HORVU.MOREX.r2.2HG0088730	26S protease regulatory subunit
HORVU.MOREX.r2.5HG0444970	26S proteasome non-ATPase regulatory subunit
HORVU.MOREX.r2.5HG0364430	28 kDa ribonucleoprotein, chloroplastic
HORVU.MOREX.r2.1HG0034150	28S ribosomal protein S29, mitochondrial
HORVU.MOREX.r2.6HG0500860	2-C-methyl-D-erythritol 2,4-cyclodiphosphate synthase
HORVU.MOREX.r2.5HG0353850	2-methylcitrate dehydratase (2-methyl-trans-aconitate forming)
HORVU.MOREX.r2.7HG0545900	2-oxoglutarate (2OG) and Fe(II)-dependent oxygenase superfamily protein
HORVU.MOREX.r2.3HG0258460	2-oxoglutarate (2OG) and Fe(II)-dependent oxygenase superfamily protein
HORVU.MOREX.r2.1HG0046180	2-oxoglutarate (2OG) and Fe(II)-dependent oxygenase superfamily protein
HORVU.MOREX.r2.7HG0545910	2-oxoglutarate (2OG) and Fe(II)-dependent oxygenase superfamily protein
HORVU.MOREX.r2.2HG0087070	2-oxoglutarate (2OG) and Fe(II)-dependent oxygenase superfamily protein
HORVU.MOREX.r2.3HG0215230	2-oxoglutarate ferrous-dependent oxygenase
HORVU.MOREX.r2.5HG0375570	3'(2'),5'-bisphosphate nucleotidase 1
HORVU.MOREX.r2.7HG0608850	30S ribosomal protein S11
HORVU.MOREX.r2.1HG0058860	30S ribosomal protein S12
HORVU.MOREX.r2.5HG0401300	30S ribosomal protein S2
HORVU.MOREX.r2.2HG0168090	30S ribosomal protein S2, chloroplastic
HORVU.MOREX.r2.4HG0318000	30S ribosomal protein S7
HORVU.MOREX.r2.2HG0116500	3'-5' exonuclease domain protein
HORVU.MOREX.r2.3HG0255150	3'-5'-exoribonuclease family protein
HORVU.MOREX.r2.2HG0155310	3-hexulose-6-phosphate isomerase
HORVU.MOREX.r2.1HG0029870	3-isopropylmalate dehydratase small subunit
HORVU.MOREX.r2.6HG0451290	3-ketoacyl-CoA synthase
HORVU.MOREX.r2.5HG0389150	3-ketoacyl-CoA thiolase
HORVU.MOREX.r2.2HG0154570	3-oxo-5-alpha-steroid 4-dehydrogenase 3
HORVU.MOREX.r2.1HG0011190	3-oxo-5-alpha-steroid 4-dehydrogenase family protein
HORVU.MOREX.r2.6HG0475100	3-oxoacyl-[acyl-carrier-protein] synthase
HORVU.MOREX.r2.2HG0141350	3-oxoacyl-[acyl-carrier-protein] synthase
HORVU.MOREX.r2.5HG0377950	3-phosphoshikimate 1-carboxyvinyltransferase
HORVU.MOREX.r2.7HG0584290	40S ribosomal protein S13
HORVU.MOREX.r2.7HG0595620	40S ribosomal protein S24
HORVU.MOREX.r2.4HG0331970	40S ribosomal protein S3a
HORVU.MOREX.r2.7HG0614180	4-coumarate:CoA ligase
HORVU.MOREX.r2.2HG0154600	4-hydroxy-tetrahydrodipicolinate synthase
HORVU.MOREX.r2.7HG0569420	50S ribosomal protein 6, chloroplastic
HORVU.MOREX.r2.6HG0521890	50S ribosomal protein L14
HORVU.MOREX.r2.1HG0070820	50S ribosomal protein L21
HORVU.MOREX.r2.2HG0148030	50S ribosomal protein L23
HORVU.MOREX.r2.1HG0074060	50S ribosomal protein L7/L12
HORVU.MOREX.r2.2HG0099910	50S ribosomal protein L7Ae
HORVU.MOREX.r2.4HG0335090	5-dehydro-2-deoxygluconokinase
HORVU.MOREX.r2.5HG0353240	5-methyltetrahydropteroyltriglutamate--homocysteine methyltransferase
HORVU.MOREX.r2.5HG0420580	60 kDa chaperonin
HORVU.MOREX.r2.7HG0531280	60 kDa chaperonin
HORVU.MOREX.r2.2HG0084300	60 kDa chaperonin
HORVU.MOREX.r2.3HG0247040	60S ribosomal protein L24
HORVU.MOREX.r2.5HG0408510	60S ribosomal protein L32
HORVU.MOREX.r2.7HG0590040	60S ribosomal protein L37a
HORVU.MOREX.r2.5HG0431510	60S ribosomal protein L4
HORVU.MOREX.r2.2HG0137370	60S ribosomal protein L5
HORVU.MOREX.r2.7HG0531000	6-phosphogluconate dehydrogenase, decarboxylating
HORVU.MOREX.r2.3HG0274810	91A protein
HORVU.MOREX.r2.3HG0246890	91A protein
HORVU.MOREX.r2.5HG0421990	9-cis-epoxycarotenoid dioxygenase
HORVU.MOREX.r2.3HG0252060	ABC subfamily C transporter
HORVU.MOREX.r2.2HG0085110	ABC subfamily C transporter
HORVU.MOREX.r2.3HG0272100	ABC transporter ATP-binding protein
HORVU.MOREX.r2.1HG0002840	ABC transporter ATP-binding protein
HORVU.MOREX.r2.5HG0390330	ABC transporter B family member 1
HORVU.MOREX.r2.3HG0251120	ABC transporter B family protein
HORVU.MOREX.r2.5HG0396970	ABC transporter G family member
HORVU.MOREX.r2.4HG0333940	ABC transporter G family member
HORVU.MOREX.r2.7HG0595370	ABC transporter-like family-protein
HORVU.MOREX.r2.5HG0360390	ABC-2 type transporter family protein
HORVU.MOREX.r2.5HG0430000	abscisic acid responsive elements-binding factor 2
HORVU.MOREX.r2.3HG0184690	Abscisic acid-deficient 4
HORVU.MOREX.r2.3HG0219570	Abscisic acid-responsive protein
HORVU.MOREX.r2.2HG0138670	Abscisic stress ripening
HORVU.MOREX.r2.4HG0286960	Acetolactate synthase small subunit
HORVU.MOREX.r2.5HG0396010	Acetyl-coenzyme A synthetase
HORVU.MOREX.r2.2HG0107650	Acetylglutamate kinase
HORVU.MOREX.r2.7HG0534180	Acid phosphatase 1
HORVU.MOREX.r2.7HG0595450	Acid phosphatase 1
HORVU.MOREX.r2.4HG0278200	Acidic leucine-rich nuclear phosphoprotein 32-related protein
HORVU.MOREX.r2.6HG0523570	Aconitate hydratase
HORVU.MOREX.r2.4HG0340370	Aconitate hydratase
HORVU.MOREX.r2.1HG0019280	ACT domain repeat 5
HORVU.MOREX.r2.4HG0283810	ACT domain-containing protein ACR4
HORVU.MOREX.r2.3HG0250030	Actin
HORVU.MOREX.r2.7HG0543310	actin cross-linking protein (DUF569)
HORVU.MOREX.r2.5HG0433020	Actin cross-linking protein, putative
HORVU.MOREX.r2.5HG0437490	Actin depolymerizing factor
HORVU.MOREX.r2.3HG0190330	Actin/actin-like family protein
HORVU.MOREX.r2.5HG0415590	Acyl carrier protein
HORVU.MOREX.r2.7HG0592440	Acyl-[acyl-carrier-protein] hydrolase
HORVU.MOREX.r2.7HG0538610	Acyl-[acyl-carrier-protein] hydrolase
HORVU.MOREX.r2.6HG0525010	Acyl-CoA-binding domain-containing protein 4
HORVU.MOREX.r2.7HG0532460	Acyl-CoA-binding protein
HORVU.MOREX.r2.4HG0292470	Acyl-coenzyme A oxidase
HORVU.MOREX.r2.3HG0200280	Acyl-protein thioesterase 2
HORVU.MOREX.r2.2HG0148400	Adenine phosphoribosyltransferase
HORVU.MOREX.r2.7HG0540540	Adenylate cyclase
HORVU.MOREX.r2.4HG0336370	Adenylosuccinate synthetase
HORVU.MOREX.r2.2HG0109220	Adenylyl-sulfate kinase
HORVU.MOREX.r2.7HG0621550	Adhesion G-protein coupled receptor G2
HORVU.MOREX.r2.6HG0459500	ADP-ribosylation factor
HORVU.MOREX.r2.2HG0166840	Agmatine coumaroyltransferase-2
HORVU.MOREX.r2.1HG0011700	alanine:glyoxylate aminotransferase 2
HORVU.MOREX.r2.1HG0004380	alanine-tRNA ligase, putative (DUF760)
HORVU.MOREX.r2.3HG0200550	Alba DNA/RNA-binding protein
HORVU.MOREX.r2.4HG0283940	Alba DNA/RNA-binding protein
HORVU.MOREX.r2.6HG0495580	Alcohol dehydrogenase
HORVU.MOREX.r2.4HG0338630	Alcohol dehydrogenase, putative
HORVU.MOREX.r2.2HG0090320	Aldehyde dehydrogenase
HORVU.MOREX.r2.3HG0257820	Aldehyde dehydrogenase, putative
HORVU.MOREX.r2.5HG0429900	Aldehyde oxidase, putative
HORVU.MOREX.r2.2HG0145130	Aldo/keto reductase family oxidoreductase
HORVU.MOREX.r2.3HG0251980	Aldo-keto reductase
HORVU.MOREX.r2.7HG0562660	Alkaline alpha-galactosidase seed imbibition protein
HORVU.MOREX.r2.1HG0054330	Allyl alcohol dehydrogenase-like protein
HORVU.MOREX.r2.6HG0501200	Alpha amylase inhibitor protein
HORVU.MOREX.r2.2HG0104420	Alpha/beta hydrolase, putative
HORVU.MOREX.r2.5HG0428110	Alpha/beta-hydrolase superfamily protein
HORVU.MOREX.r2.2HG0147330	Alpha/beta-hydrolase superfamily protein
HORVU.MOREX.r2.5HG0401000	Alpha/beta-hydrolase superfamily protein
HORVU.MOREX.r2.6HG0497740	Alpha/beta-hydrolase superfamily protein
HORVU.MOREX.r2.1HG0051760	Alpha/beta-Hydrolases superfamily protein
HORVU.MOREX.r2.1HG0051720	Alpha/beta-Hydrolases superfamily protein
HORVU.MOREX.r2.4HG0344920	Alpha/beta-Hydrolases superfamily protein
HORVU.MOREX.r2.4HG0325650	alpha/beta-Hydrolases superfamily protein
HORVU.MOREX.r2.5HG0410300	Alpha/beta-Hydrolases superfamily protein
HORVU.MOREX.r2.5HG0396640	Alpha/beta-Hydrolases superfamily protein
HORVU.MOREX.r2.3HG0253010	Alpha/beta-Hydrolases superfamily protein
HORVU.MOREX.r2.4HG0308630	alpha/beta-Hydrolases superfamily protein
HORVU.MOREX.r2.2HG0110760	alpha/beta-Hydrolases superfamily protein
HORVU.MOREX.r2.6HG0452140	Alpha/beta-Hydrolases superfamily protein, putative
HORVU.MOREX.r2.7HG0550760	Alpha/beta-Hydrolases superfamily protein, putative
HORVU.MOREX.r2.5HG0362290	Alpha/beta-Hydrolases superfamily protein, putative
HORVU.MOREX.r2.6HG0522340	Alpha/beta-Hydrolases superfamily protein, putative
HORVU.MOREX.r2.4HG0342170	Alpha-2C adrenergic receptor
HORVU.MOREX.r2.1HG0040010	alpha-adaptin
HORVU.MOREX.r2.7HG0598120	Alpha-amylase
HORVU.MOREX.r2.2HG0101820	Alpha-ketoglutarate-dependent dioxygenase alkB-like protein 2
HORVU.MOREX.r2.4HG0316540	Alpha-L-arabinofuranosidase 1
HORVU.MOREX.r2.2HG0169760	Alpha-N-acetylglucosaminidase
HORVU.MOREX.r2.4HG0320420	Alpha-taxilin, putative, expressed
HORVU.MOREX.r2.7HG0556730	Aluminum activated malate transporter family protein
HORVU.MOREX.r2.2HG0144880	Amine oxidase
HORVU.MOREX.r2.2HG0176050	Amine oxidase family protein
HORVU.MOREX.r2.5HG0403890	Amino acid dehydrogenase family protein
HORVU.MOREX.r2.2HG0168120	Amino acid permease
HORVU.MOREX.r2.2HG0133050	Amino acid transporter, putative
HORVU.MOREX.r2.6HG0457250	aminoalcoholphosphotransferase 1
HORVU.MOREX.r2.3HG0261040	Aminopeptidase
HORVU.MOREX.r2.7HG0590510	Aminotransferase
HORVU.MOREX.r2.1HG0049040	AMP deaminase
HORVU.MOREX.r2.6HG0506920	AMP-dependent synthetase and ligase family protein
HORVU.MOREX.r2.3HG0247710	Ankyrin repeat family protein
HORVU.MOREX.r2.2HG0117170	Ankyrin repeat family protein
HORVU.MOREX.r2.7HG0623000	Ankyrin repeat family protein
HORVU.MOREX.r2.7HG0532610	Ankyrin repeat family protein, putative
HORVU.MOREX.r2.2HG0114860	Ankyrin repeat protein family-like protein
HORVU.MOREX.r2.4HG0287090	Ankyrin repeat protein SKIP35
HORVU.MOREX.r2.2HG0154590	Ankyrin repeat protein-like
HORVU.MOREX.r2.3HG0253050	Ankyrin repeat-containing protein
HORVU.MOREX.r2.5HG0440910	Ankyrin repeat-containing protein F37A4.4
HORVU.MOREX.r2.4HG0334950	Ankyrin repeat-containing protein, putative
HORVU.MOREX.r2.7HG0533920	Anthocyanin 5-aromatic acyltransferase
HORVU.MOREX.r2.1HG0068450	AP2/B3 transcription factor family protein
HORVU.MOREX.r2.6HG0525840	AP-5 complex subunit beta-1
HORVU.MOREX.r2.4HG0342720	Appr-1-p processing enzyme family protein
HORVU.MOREX.r2.4HG0345780	Apyrase
HORVU.MOREX.r2.3HG0275030	Aquaporin
HORVU.MOREX.r2.2HG0175310	Arabinanase/levansucrase/invertase, putative
HORVU.MOREX.r2.3HG0194930	ARF guanine-nucleotide exchange factor GNOM
HORVU.MOREX.r2.2HG0125360	Arf-GAP with SH3 domain, ANK repeat and PH domain-containing protein 1
HORVU.MOREX.r2.3HG0240980	arginine N-methyltransferase, putative (DUF688)
HORVU.MOREX.r2.6HG0456090	Arginine/serine-rich splicing factor
HORVU.MOREX.r2.3HG0257620	Arginine--tRNA ligase
HORVU.MOREX.r2.2HG0162030	Argonaute
HORVU.MOREX.r2.2HG0097430	ARM repeat superfamily protein
HORVU.MOREX.r2.6HG0451330	ARM repeat superfamily protein
HORVU.MOREX.r2.3HG0269630	ARM repeat superfamily protein
HORVU.MOREX.r2.7HG0547190	ARM repeat superfamily protein
HORVU.MOREX.r2.6HG0506200	armadillo repeat kinesin 2
HORVU.MOREX.r2.2HG0158210	Armadillo/beta-catenin-like repeat family protein, expressed
HORVU.MOREX.r2.7HG0596210	Aspartate aminotransferase
HORVU.MOREX.r2.3HG0193600	Aspartate--tRNA ligase
HORVU.MOREX.r2.6HG0459350	Aspartate--tRNA(Asp/Asn) ligase
HORVU.MOREX.r2.3HG0252210	Aspartic proteinase nepenthesin
HORVU.MOREX.r2.5HG0363510	Aspartic proteinase nepenthesin-1
HORVU.MOREX.r2.3HG0272400	Aspartyl aminopeptidase, putative
HORVU.MOREX.r2.7HG0548730	Aspartyl/glutamyl-tRNA(Asn/Gln) amidotransferase subunit C
HORVU.MOREX.r2.3HG0202990	AT1G17665-like protein
HORVU.MOREX.r2.3HG0258000	AT1G65230-like protein
HORVU.MOREX.r2.7HG0610130	ATPase E1-E2 type family protein / haloacid dehalogenase-like hydrolase family protein
HORVU.MOREX.r2.4HG0347390	ATPase, AAA family protein, expressed
HORVU.MOREX.r2.6HG0479930	ATP-binding cassette transporter subfamily A member
HORVU.MOREX.r2.7HG0593370	ATP-binding cassette transporter subfamily A member
HORVU.MOREX.r2.4HG0348890	ATP-dependent chaperone ClpB
HORVU.MOREX.r2.2HG0151420	ATP-dependent Clp protease proteolytic subunit
HORVU.MOREX.r2.1HG0043180	ATP-dependent DNA helicase II subunit 1
HORVU.MOREX.r2.7HG0527230	ATP-dependent helicase/nuclease subunit A
HORVU.MOREX.r2.2HG0079620	ATP-dependent protease ATPase subunit HslU
HORVU.MOREX.r2.7HG0587770	ATP-dependent RNA helicase
HORVU.MOREX.r2.3HG0273300	ATP-dependent RNA helicase
HORVU.MOREX.r2.3HG0218890	ATP-dependent RNA helicase DB10
HORVU.MOREX.r2.3HG0227920	ATP-dependent zinc metalloprotease FtsH
HORVU.MOREX.r2.2HG0115940	ATP-dependent zinc metalloprotease FtsH
HORVU.MOREX.r2.3HG0231020	ATP-dependent zinc metalloprotease FtsH
HORVU.MOREX.r2.2HG0093400	ATP-dependent zinc metalloprotease FtsH
HORVU.MOREX.r2.4HG0312450	ATP-dependent zinc metalloprotease FtsH 1
HORVU.MOREX.r2.3HG0251550	AT-rich interactive domain-containing protein 2
HORVU.MOREX.r2.4HG0299500	Autophagy protein 5
HORVU.MOREX.r2.3HG0227220	Auxilin-related protein 1
HORVU.MOREX.r2.6HG0519150	Auxin efflux carrier component
HORVU.MOREX.r2.4HG0322140	Auxin efflux carrier family protein
HORVU.MOREX.r2.4HG0284690	Auxin repressed/dormancy associated protein
HORVU.MOREX.r2.2HG0176090	Auxin response factor
HORVU.MOREX.r2.3HG0240310	Auxin response factor
HORVU.MOREX.r2.6HG0522850	Auxin-responsive protein
HORVU.MOREX.r2.5HG0446910	Avr9/Cf-9 rapidly elicited protein
HORVU.MOREX.r2.6HG0467210	B3 domain-containing protein
HORVU.MOREX.r2.6HG0503550	Bacteriophage N4 adsorption B
HORVU.MOREX.r2.3HG0186570	Basic 7S globulin 2
HORVU.MOREX.r2.6HG0479800	basic helix-loop-helix (bHLH) DNA-binding superfamily protein
HORVU.MOREX.r2.4HG0316970	Basic helix-loop-helix (BHLH) DNA-binding superfamily protein
HORVU.MOREX.r2.5HG0377510	Basic helix-loop-helix transcription factor
HORVU.MOREX.r2.1HG0076730	B-block binding subunit of TFIIIC
HORVU.MOREX.r2.3HG0193850	B-block-binding subunit of TFIIIC protein
HORVU.MOREX.r2.7HG0596130	B-box type zinc finger protein with CCT domain-containing protein
HORVU.MOREX.r2.3HG0189320	Beige/BEACH and WD40 domain-containing protein
HORVU.MOREX.r2.3HG0182570	Benzyl alcohol O-benzoyltransferase
HORVU.MOREX.r2.1HG0037520	Benzyl alcohol O-benzoyltransferase
HORVU.MOREX.r2.4HG0345900	Bestrophin/UPF0187
HORVU.MOREX.r2.3HG0261940	beta vacuolar processing enzyme
HORVU.MOREX.r2.4HG0345190	Beta,beta-carotene 9',10'-oxygenase
HORVU.MOREX.r2.5HG0355510	Beta-1,3-galactosyltransferase-like protein
HORVU.MOREX.r2.4HG0343440	Beta-amylase
HORVU.MOREX.r2.7HG0603370	Beta-carotene isomerase D27, chloroplastic
HORVU.MOREX.r2.1HG0075390	beta-galactosidase
HORVU.MOREX.r2.7HG0601110	beta-galactosidase 8
HORVU.MOREX.r2.UnG0624230	Beta-glucosidase
HORVU.MOREX.r2.3HG0210690	Beta-glucosidase, putative
HORVU.MOREX.r2.4HG0285170	Beta-xylosidase, putative
HORVU.MOREX.r2.2HG0130250	BHLH transcription factor-like protein
HORVU.MOREX.r2.5HG0355750	Bidirectional sugar transporter SWEET
HORVU.MOREX.r2.3HG0262650	Bifunctional purine biosynthesis protein purH
HORVU.MOREX.r2.1HG0065150	Bifunctional uridylyltransferase/uridylyl-removing enzyme
HORVU.MOREX.r2.4HG0290120	Bifunctional uridylyltransferase/uridylyl-removing enzyme
HORVU.MOREX.r2.4HG0326060	Bifunctional uridylyltransferase/uridylyl-removing enzyme
HORVU.MOREX.r2.5HG0386750	binding / calmodulin binding protein
HORVU.MOREX.r2.5HG0426270	binding protein
HORVU.MOREX.r2.6HG0471010	Biotin synthase
HORVU.MOREX.r2.4HG0336750	BnaC08g32970D protein
HORVU.MOREX.r2.4HG0283770	BnaCnng07380D protein
HORVU.MOREX.r2.4HG0299290	Box C/D snoRNA protein 1
HORVU.MOREX.r2.1HG0044030	Branched-chain-amino-acid aminotransferase
HORVU.MOREX.r2.2HG0161540	Brefeldin A-inhibited guanine nucleotide-exchange protein
HORVU.MOREX.r2.4HG0326110	Brefeldin A-inhibited guanine nucleotide-exchange protein
HORVU.MOREX.r2.6HG0518280	bromodomain and extraterminal domain protein 9
HORVU.MOREX.r2.5HG0418020	Bromodomain-containing protein
HORVU.MOREX.r2.3HG0257740	BSD domain (BTF2-like transcription factors, Synapse-associated proteins and DOS2-like proteins)
HORVU.MOREX.r2.5HG0392790	BTB/POZ domain containing protein, expressed
HORVU.MOREX.r2.7HG0611400	BTB/POZ domain containing protein, expressed
HORVU.MOREX.r2.5HG0426350	BTB/POZ domain-containing protein
HORVU.MOREX.r2.4HG0280340	BURP domain-containing protein 2
HORVU.MOREX.r2.5HG0367280	BZIP transcription factor
HORVU.MOREX.r2.5HG0394690	bZIP transcription factor, putative (DUF630 and DUF632)
HORVU.MOREX.r2.4HG0346440	C2H2-like zinc finger protein
HORVU.MOREX.r2.2HG0179510	C2H2-like zinc finger protein
HORVU.MOREX.r2.5HG0432740	Cactin
HORVU.MOREX.r2.4HG0284650	Calcineurin B-like protein
HORVU.MOREX.r2.4HG0286890	Calcineurin-like metallo-phosphoesterase superfamily protein
HORVU.MOREX.r2.1HG0046990	Calcium binding family protein
HORVU.MOREX.r2.4HG0315500	Calcium binding protein
HORVU.MOREX.r2.1HG0067920	Calcium homeostasis regulator CHoR1
HORVU.MOREX.r2.3HG0255410	Calcium sensing receptor, chloroplastic
HORVU.MOREX.r2.2HG0172530	Calcium/calmodulin-dependent 3',5'-cyclic nucleotide phosphodiesterase 1C
HORVU.MOREX.r2.4HG0324290	Calcium-binding EF hand family protein, putative, expressed
HORVU.MOREX.r2.4HG0325840	Calcium-binding EF-hand family protein
HORVU.MOREX.r2.6HG0456130	Calcium-binding family protein
HORVU.MOREX.r2.2HG0107680	Calcium-binding protein 39, putative, expressed
HORVU.MOREX.r2.3HG0247520	Calcium-dependent lipid-binding (CaLB domain) family protein
HORVU.MOREX.r2.6HG0463800	Calcium-dependent lipid-binding domain protein
HORVU.MOREX.r2.1HG0058430	Calcium-dependent protein kinase
HORVU.MOREX.r2.6HG0463410	calcium-dependent protein kinase 14
HORVU.MOREX.r2.2HG0152560	Calcium-dependent protein kinase, putative
HORVU.MOREX.r2.7HG0555560	Caleosin
HORVU.MOREX.r2.1HG0075300	Calmodulin
HORVU.MOREX.r2.2HG0090830	Calmodulin
HORVU.MOREX.r2.1HG0024150	Calmodulin binding protein
HORVU.MOREX.r2.5HG0384420	Calmodulin binding protein-like protein
HORVU.MOREX.r2.7HG0605630	Calmodulin, putative
HORVU.MOREX.r2.6HG0462730	Calmodulin-binding family protein, putative, expressed
HORVU.MOREX.r2.4HG0316980	Calmodulin-binding family protein, putative, expressed
HORVU.MOREX.r2.3HG0246380	Calmodulin-related protein
HORVU.MOREX.r2.6HG0461570	Calreticulin/calnexin
HORVU.MOREX.r2.6HG0461610	Calreticulin/calnexin
HORVU.MOREX.r2.5HG0392060	Carotenoid cleavage dioxygenase
HORVU.MOREX.r2.3HG0267820	Carotenoid cleavage dioxygenase
HORVU.MOREX.r2.2HG0105840	carotenoid cleavage dioxygenase 7
HORVU.MOREX.r2.5HG0426390	CASP-like protein
HORVU.MOREX.r2.5HG0436720	CASP-like protein
HORVU.MOREX.r2.2HG0130510	CASP-like protein
HORVU.MOREX.r2.4HG0319140	CASP-like protein
HORVU.MOREX.r2.1HG0041770	CASP-like protein
HORVU.MOREX.r2.6HG0453490	Catalase
HORVU.MOREX.r2.4HG0283440	Cathepsin B-like cysteine protease
HORVU.MOREX.r2.2HG0093840	Cation calcium exchanger
HORVU.MOREX.r2.2HG0158650	Cationic amino acid transporter, putative
HORVU.MOREX.r2.1HG0050410	Cation-transporting ATPase
HORVU.MOREX.r2.7HG0591000	CBL-interacting protein kinase 17
HORVU.MOREX.r2.3HG0259110	CBS domain containing protein
HORVU.MOREX.r2.4HG0291230	CBS domain containing protein
HORVU.MOREX.r2.6HG0518050	CCR4-NOT transcription complex family protein
HORVU.MOREX.r2.1HG0017170	CDK5 regulatory subunit-associated protein 2
HORVU.MOREX.r2.4HG0321150	CDP-diacylglycerol--glycerol-3-phosphate 3-phosphatidyltransferase
HORVU.MOREX.r2.3HG0245100	Cdp-diacylglycerol--glycerol-3-phosphate 3-phosphatidyltransferase, putative
HORVU.MOREX.r2.7HG0554270	CDP-diacylglycerol--glycerol-3-phosphate 3-phosphatidyltransferase, putative
HORVU.MOREX.r2.2HG0166380	Cell division protein ftsZ
HORVU.MOREX.r2.4HG0345590	CENP-C
HORVU.MOREX.r2.3HG0214060	Chaperone DnaJ
HORVU.MOREX.r2.6HG0513330	Chaperone dnaJ-like protein
HORVU.MOREX.r2.5HG0438500	Chaperone protein dnaJ
HORVU.MOREX.r2.2HG0087060	Chaperone protein DnaJ
HORVU.MOREX.r2.4HG0316170	Chaperone protein DnaJ
HORVU.MOREX.r2.4HG0325820	Chaperone protein dnaJ
HORVU.MOREX.r2.7HG0619420	Chaperone protein htpG family protein
HORVU.MOREX.r2.4HG0291200	Charged multivesicular body protein 1
HORVU.MOREX.r2.3HG0240990	CheY-like two-component responsive regulator family protein
HORVU.MOREX.r2.7HG0615670	Chitinase
HORVU.MOREX.r2.3HG0202610	Chitinase
HORVU.MOREX.r2.1HG0070100	Chitinase family protein
HORVU.MOREX.r2.2HG0140630	Chloride channel protein
HORVU.MOREX.r2.6HG0461010	Chloride channel protein
HORVU.MOREX.r2.3HG0249480	Chlorophyll a-b binding protein, chloroplastic
HORVU.MOREX.r2.5HG0390620	Chlorophyll a-b binding protein, chloroplastic
HORVU.MOREX.r2.6HG0460180	Chlorophyll a-b binding protein, chloroplastic
HORVU.MOREX.r2.5HG0398280	Chlorophyll a-b binding protein, chloroplastic
HORVU.MOREX.r2.7HG0622490	Chloroplastic group IIA intron splicing facilitator CRS1, chloroplastic
HORVU.MOREX.r2.4HG0348460	Chlororespiratory reduction31
HORVU.MOREX.r2.4HG0327180	Chromosomal replication initiator protein DnaA
HORVU.MOREX.r2.3HG0260910	CinA-like protein
HORVU.MOREX.r2.6HG0471350	Cinnamoyl CoA reductase
HORVU.MOREX.r2.3HG0227590	Cinnamoyl-CoA reductase
HORVU.MOREX.r2.5HG0444620	Cinnamoyl-CoA reductase 4
HORVU.MOREX.r2.5HG0407090	Cinnamoyl-CoA reductase 4
HORVU.MOREX.r2.5HG0436910	Cinnamoyl-CoA reductase 4
HORVU.MOREX.r2.7HG0599900	Cinnamoyl-CoA reductase family protein
HORVU.MOREX.r2.1HG0041860	Cinnamoyl-CoA reductase-like protein
HORVU.MOREX.r2.1HG0057820	cinnamyl alcohol dehydrogenase 6
HORVU.MOREX.r2.4HG0295930	Clathrin heavy chain
HORVU.MOREX.r2.2HG0152190	Clavata3/ESR (CLE) gene family member
HORVU.MOREX.r2.5HG0375120	cleavage and polyadenylation specificity factor 73-I
HORVU.MOREX.r2.6HG0505470	Clustered mitochondria protein homolog
HORVU.MOREX.r2.4HG0318370	CoA ligase
HORVU.MOREX.r2.7HG0582910	CoA ligase
HORVU.MOREX.r2.6HG0478380	Coatomer beta' subunit
HORVU.MOREX.r2.5HG0364020	Coatomer beta subunit, putative
HORVU.MOREX.r2.7HG0561620	Coatomer epsilon subunit
HORVU.MOREX.r2.5HG0388990	Coatomer protein complex, subunit zeta 1
HORVU.MOREX.r2.5HG0364030	Coatomer, beta' subunit
HORVU.MOREX.r2.4HG0347580	Cold regulated protein 27
HORVU.MOREX.r2.2HG0102730	Cold regulated protein 27
HORVU.MOREX.r2.6HG0516410	Concanavalin A-like lectin protein kinase family protein
HORVU.MOREX.r2.5HG0366120	Concanavalin A-like lectin protein kinase family protein
HORVU.MOREX.r2.7HG0558970	CONSTANS-like zinc finger protein
HORVU.MOREX.r2.6HG0507820	CONSTANS-like zinc finger protein
HORVU.MOREX.r2.5HG0447480	COP1-interacting-like protein
HORVU.MOREX.r2.1HG0047490	Copine-1
HORVU.MOREX.r2.5HG0442160	Copper ion-binding protein
HORVU.MOREX.r2.4HG0336900	Copper-transporting ATPase
HORVU.MOREX.r2.7HG0606100	Copper-transporting ATPase
HORVU.MOREX.r2.7HG0562530	Copper-transporting ATPase
HORVU.MOREX.r2.1HG0021120	Core-2/I-branching beta-1,6-N-acetylglucosaminyltransferase family protein
HORVU.MOREX.r2.5HG0350180	Core-2/I-branching beta-1,6-N-acetylglucosaminyltransferase family protein
HORVU.MOREX.r2.5HG0410810	Core-2/I-branching beta-1,6-N-acetylglucosaminyltransferase family protein
HORVU.MOREX.r2.3HG0202500	Core-2/I-branching beta-1,6-N-acetylglucosaminyltransferase family protein
HORVU.MOREX.r2.5HG0415920	COS26 protein
HORVU.MOREX.r2.5HG0406900	cotton fiber, putative (DUF761)
HORVU.MOREX.r2.5HG0412690	C-repeat binding factor 3-like protein
HORVU.MOREX.r2.3HG0196600	CRS2-associated factor 1
HORVU.MOREX.r2.5HG0412680	CRT-binding factor
HORVU.MOREX.r2.5HG0412830	CRT-binding factor
HORVU.MOREX.r2.5HG0412820	CRT-binding factor
HORVU.MOREX.r2.2HG0156150	CsAtPR5
HORVU.MOREX.r2.5HG0405010	CsAtPR5
HORVU.MOREX.r2.6HG0499540	CTC-interacting domain 4
HORVU.MOREX.r2.2HG0115650	CTD small phosphatase-like protein 2, putative
HORVU.MOREX.r2.4HG0342440	C-terminal binding protein
HORVU.MOREX.r2.1HG0040810	C-terminal binding protein
HORVU.MOREX.r2.2HG0133670	Cullin-associated NEDD8-dissociated protein 1
HORVU.MOREX.r2.5HG0421970	Cyclic nucleotide-gated channel
HORVU.MOREX.r2.4HG0334960	Cyclin
HORVU.MOREX.r2.4HG0331580	Cyclin family protein
HORVU.MOREX.r2.7HG0619620	Cyclin family protein
HORVU.MOREX.r2.4HG0345310	cyclin-dependent kinase inhibitor SMR3-like protein
HORVU.MOREX.r2.3HG0250580	cyclin-dependent kinase-activating kinase assembly factor-related / CDK-activating kinase assembly factor-like protein
HORVU.MOREX.r2.3HG0224410	Cycloartenol synthase
HORVU.MOREX.r2.2HG0098580	Cyst nematode resistance protein-like
HORVU.MOREX.r2.7HG0614150	Cysteine desulfuration protein SufE
HORVU.MOREX.r2.6HG0520320	Cysteine protease
HORVU.MOREX.r2.2HG0131440	Cysteine proteinase
HORVU.MOREX.r2.1HG0055720	Cysteine proteinase inhibitor
HORVU.MOREX.r2.6HG0498680	Cysteine synthase
HORVU.MOREX.r2.6HG0481200	Cysteine synthase
HORVU.MOREX.r2.2HG0114240	Cysteine-rich receptor kinase
HORVU.MOREX.r2.4HG0344790	Cysteine-rich receptor-kinase-like protein
HORVU.MOREX.r2.7HG0593920	cysteine-rich/transmembrane domain A-like protein
HORVU.MOREX.r2.7HG0594010	cysteine-rich/transmembrane domain A-like protein
HORVU.MOREX.r2.5HG0381070	Cysteinyl-tRNA synthetase, class Ia family protein
HORVU.MOREX.r2.3HG0236130	Cytidine deaminase
HORVU.MOREX.r2.1HG0038020	Cytochrome b561
HORVU.MOREX.r2.2HG0147440	Cytochrome b561 and DOMON domain-containing protein
HORVU.MOREX.r2.7HG0567290	Cytochrome b561 and DOMON domain-containing protein
HORVU.MOREX.r2.7HG0551400	Cytochrome b-c1 complex subunit 6
HORVU.MOREX.r2.5HG0389000	Cytochrome c oxidase subunit 8A, mitochondrial
HORVU.MOREX.r2.2HG0100030	Cytochrome P450
HORVU.MOREX.r2.UnG0624330	Cytochrome P450
HORVU.MOREX.r2.3HG0245860	Cytochrome P450
HORVU.MOREX.r2.3HG0204200	Cytochrome P450
HORVU.MOREX.r2.7HG0607430	Cytochrome P450
HORVU.MOREX.r2.6HG0480100	Cytochrome P450
HORVU.MOREX.r2.7HG0592230	Cytochrome P450
HORVU.MOREX.r2.4HG0282710	Cytochrome P450
HORVU.MOREX.r2.5HG0426300	Cytochrome P450 allene oxide synthase
HORVU.MOREX.r2.3HG0247750	Cytochrome P450 family cinnamate 4-hydroxylase
HORVU.MOREX.r2.7HG0591700	Cytochrome P450 family protein
HORVU.MOREX.r2.3HG0192930	Cytochrome P450 family protein
HORVU.MOREX.r2.3HG0193980	cytochrome P450 family protein
HORVU.MOREX.r2.3HG0195830	Cytochrome P450 family protein
HORVU.MOREX.r2.1HG0049940	Cytochrome P450 family protein
HORVU.MOREX.r2.5HG0363630	Cytochrome P450 family protein, expressed
HORVU.MOREX.r2.1HG0043780	Cytochrome P450 family protein, expressed
HORVU.MOREX.r2.7HG0537330	Cytochrome P450 family protein, expressed
HORVU.MOREX.r2.2HG0172430	Cytochrome P450 family protein, expressed
HORVU.MOREX.r2.5HG0416190	Cytochrome P450, putative
HORVU.MOREX.r2.3HG0227240	Cytochrome P450, putative
HORVU.MOREX.r2.3HG0206360	Cytochrome P450, putative
HORVU.MOREX.r2.5HG0413450	Cytochrome P450, putative
HORVU.MOREX.r2.3HG0206300	Cytochrome P450, putative
HORVU.MOREX.r2.5HG0392080	cytokinin oxidase/dehydrogenase 1
HORVU.MOREX.r2.3HG0235580	Cytokinin riboside 5'-monophosphate phosphoribohydrolase
HORVU.MOREX.r2.3HG0236810	Cytosolic Fe-S cluster assembly factor NBP35
HORVU.MOREX.r2.4HG0288330	DAG protein, chloroplastic
HORVU.MOREX.r2.6HG0449050	DAG, chloroplastic
HORVU.MOREX.r2.4HG0331430	DCD (Development and cell death) domain protein
HORVU.MOREX.r2.4HG0338580	DCD (Development and Cell Death) domain protein
HORVU.MOREX.r2.2HG0180010	DDB1-and CUL4-associated factor-like protein 1
HORVU.MOREX.r2.2HG0107300	DEAD/DEAH box RNA helicase family protein
HORVU.MOREX.r2.5HG0440740	Deaminase-related family protein
HORVU.MOREX.r2.6HG0474990	Dehydrodolichyl diphosphate synthase complex subunit NUS1
HORVU.MOREX.r2.1HG0014600	Dehydrogenase
HORVU.MOREX.r2.5HG0444020	Dehydrogenase/reductase
HORVU.MOREX.r2.2HG0142890	Dehydrogenase/reductase SDR family protein
HORVU.MOREX.r2.1HG0075280	Delta(14)-sterol reductase
HORVU.MOREX.r2.5HG0424950	Dentin sialophosphoprotein-like protein, putative
HORVU.MOREX.r2.4HG0330200	Dentin sialophosphoprotein-related, putative
HORVU.MOREX.r2.3HG0248940	Deoxycytidine kinase
HORVU.MOREX.r2.1HG0047430	Diacylglycerol kinase
HORVU.MOREX.r2.6HG0465380	Diaminopimelate decarboxylase
HORVU.MOREX.r2.2HG0090840	Dihydrofolate reductase
HORVU.MOREX.r2.2HG0090850	Dihydrofolate reductase
HORVU.MOREX.r2.5HG0437350	Dihydrolipoamide acetyltransferase component of pyruvate dehydrogenase complex
HORVU.MOREX.r2.5HG0426000	Dihydrolipoamide acetyltransferase, long form protein
HORVU.MOREX.r2.1HG0011090	Dihydrolipoyl dehydrogenase
HORVU.MOREX.r2.2HG0174870	Dihydroorotate dehydrogenase (Quinone)
HORVU.MOREX.r2.4HG0305150	Dihydropterin pyrophosphokinase / Dihydropteroate synthase
HORVU.MOREX.r2.7HG0550890	Dipeptidyl peptidase family member 6
HORVU.MOREX.r2.7HG0620940	Dirigent protein
HORVU.MOREX.r2.2HG0174900	disease resistance family protein / LRR family protein
HORVU.MOREX.r2.5HG0425300	Disease resistance protein
HORVU.MOREX.r2.1HG0068760	Disease resistance protein (NBS-LRR class) family
HORVU.MOREX.r2.1HG0003400	Disease resistance protein (NBS-LRR class) family
HORVU.MOREX.r2.1HG0074570	Disease resistance protein (NBS-LRR class) family
HORVU.MOREX.r2.7HG0613690	Disease resistance protein (NBS-LRR class) family
HORVU.MOREX.r2.1HG0065180	Disease resistance protein (NBS-LRR class) family
HORVU.MOREX.r2.3HG0188980	Disease resistance protein (TIR-NBS-LRR class)
HORVU.MOREX.r2.3HG0191050	disease resistance protein (TIR-NBS-LRR class) family
HORVU.MOREX.r2.5HG0375110	Disease resistance protein (TIR-NBS-LRR class) family
HORVU.MOREX.r2.7HG0560530	Disease resistance protein RPM1
HORVU.MOREX.r2.1HG0036790	Disease resistance protein RPM1
HORVU.MOREX.r2.3HG0265740	Disease resistance protein RPM1
HORVU.MOREX.r2.7HG0540200	Disease resistance protein RPM1
HORVU.MOREX.r2.7HG0614700	Disease resistance protein RPM1
HORVU.MOREX.r2.6HG0524270	Disease resistance protein RPM1
HORVU.MOREX.r2.4HG0292570	Disease resistance protein RPS4
HORVU.MOREX.r2.3HG0245240	Disulfide isomerase
HORVU.MOREX.r2.5HG0370320	DNA binding protein
HORVU.MOREX.r2.1HG0060230	DNA glycosylase
HORVU.MOREX.r2.2HG0118130	DNA helicase ROCK-N-ROLLERS
HORVU.MOREX.r2.2HG0159660	DNA ligase
HORVU.MOREX.r2.7HG0575930	DNA mismatch repair protein MSH3
HORVU.MOREX.r2.1HG0039140	DNA mismatch repair protein MutS, putative
HORVU.MOREX.r2.7HG0605700	DNA polymerase IV
HORVU.MOREX.r2.2HG0104390	DNA primase large subunit PriL
HORVU.MOREX.r2.3HG0249400	DNA repair protein
HORVU.MOREX.r2.5HG0365170	DNA repair protein Rad50
HORVU.MOREX.r2.3HG0211910	DNA repair REX1-B protein
HORVU.MOREX.r2.6HG0512410	DNA repair/recombination protein
HORVU.MOREX.r2.4HG0289580	DNA topoisomerase 2-binding protein 1
HORVU.MOREX.r2.2HG0155490	DNA/RNA helicase protein
HORVU.MOREX.r2.2HG0105930	DNA/RNA helicase protein
HORVU.MOREX.r2.6HG0512600	DNA-3-methyladenine glycosylase
HORVU.MOREX.r2.7HG0616030	DNA-3-methyladenine glycosylase, putative
HORVU.MOREX.r2.3HG0187380	DNA-binding storekeeper protein-related transcriptional regulator
HORVU.MOREX.r2.1HG0047060	DNA-directed RNA polymerase
HORVU.MOREX.r2.5HG0387320	DNA-directed RNA polymerase family protein
HORVU.MOREX.r2.4HG0284810	DNA-directed RNA polymerase III subunit RPC4
HORVU.MOREX.r2.5HG0418160	DNA-directed RNA polymerase subunit
HORVU.MOREX.r2.2HG0158870	DNA-directed RNA polymerase subunit
HORVU.MOREX.r2.5HG0362230	DNA-directed RNA polymerase subunit
HORVU.MOREX.r2.2HG0121470	DNA-directed RNA polymerase subunit
HORVU.MOREX.r2.4HG0338210	DNA-directed RNA polymerase subunit
HORVU.MOREX.r2.1HG0019570	DNA-directed RNA polymerase subunit
HORVU.MOREX.r2.6HG0465890	DNA-directed RNA polymerase subunit
HORVU.MOREX.r2.7HG0580860	DNA-directed RNA polymerase subunit
HORVU.MOREX.r2.4HG0327770	DNA-directed RNA polymerase subunit beta
HORVU.MOREX.r2.3HG0242390	DNA-directed RNA polymerase subunit beta''
HORVU.MOREX.r2.5HG0377400	DNA-directed RNA polymerase subunit N
HORVU.MOREX.r2.2HG0090150	DnaJ
HORVU.MOREX.r2.2HG0153030	DNAse I-like superfamily protein
HORVU.MOREX.r2.6HG0459140	DNAse I-like superfamily protein
HORVU.MOREX.r2.1HG0060720	Dof zinc finger protein
HORVU.MOREX.r2.3HG0256200	Dof zinc finger protein
HORVU.MOREX.r2.3HG0211790	Dof zinc finger protein
HORVU.MOREX.r2.3HG0197800	dolichol phosphate-mannose biosynthesis regulatory protein-like protein
HORVU.MOREX.r2.1HG0054340	Domain of Uncharacterized protein function
HORVU.MOREX.r2.3HG0271760	Doublesex and mab-3 related transcription factor 3
HORVU.MOREX.r2.4HG0280740	Drug/metabolite transporter
HORVU.MOREX.r2.7HG0621560	D-tagatose-1,6-bisphosphate aldolase subunit KbaY
HORVU.MOREX.r2.7HG0559890	Dual specificity protein phosphatase, putative
HORVU.MOREX.r2.3HG0274190	Dual-specificity RNA methyltransferase RlmN
HORVU.MOREX.r2.2HG0168110	DUF1365 family protein
HORVU.MOREX.r2.3HG0233140	DUF1639 family protein
HORVU.MOREX.r2.1HG0047440	DUF1644 family protein
HORVU.MOREX.r2.1HG0074140	DUF1645 family protein
HORVU.MOREX.r2.3HG0227610	DUF1645 family protein
HORVU.MOREX.r2.3HG0229860	DUF1645 family protein
HORVU.MOREX.r2.7HG0549430	DUF1677 family protein
HORVU.MOREX.r2.3HG0209250	DUF1685 family protein
HORVU.MOREX.r2.1HG0014490	DUF1685 family protein
HORVU.MOREX.r2.5HG0435480	DUF21 domain-containing protein
HORVU.MOREX.r2.7HG0607080	DUF3511 domain protein
HORVU.MOREX.r2.1HG0044090	DUF3527 domain protein
HORVU.MOREX.r2.4HG0334870	DUF506 family protein
HORVU.MOREX.r2.1HG0048170	DUF538 family protein (Protein of unknown function, DUF538)
HORVU.MOREX.r2.5HG0438900	DUF641 family protein
HORVU.MOREX.r2.6HG0502050	DUF740 family protein
HORVU.MOREX.r2.5HG0377310	Dynamin family protein, putative, expressed
HORVU.MOREX.r2.6HG0465900	Dynamin-3
HORVU.MOREX.r2.3HG0239620	Dynamin-like
HORVU.MOREX.r2.2HG0143430	Dynein light chain
HORVU.MOREX.r2.3HG0195660	E3 ubiquitin-protein ligase
HORVU.MOREX.r2.3HG0245370	E3 ubiquitin-protein ligase
HORVU.MOREX.r2.2HG0095980	E3 ubiquitin-protein ligase
HORVU.MOREX.r2.2HG0105500	E3 ubiquitin-protein ligase
HORVU.MOREX.r2.2HG0173800	E3 ubiquitin-protein ligase
HORVU.MOREX.r2.4HG0284290	E3 ubiquitin-protein ligase HOS1
HORVU.MOREX.r2.7HG0562810	E3 ubiquitin-protein ligase RGLG2
HORVU.MOREX.r2.2HG0163880	E3 ubiquitin-protein ligase RNF14
HORVU.MOREX.r2.4HG0334860	E3 ubiquitin-protein ligase SINA-like 10
HORVU.MOREX.r2.2HG0170770	EamA-like transporter family
HORVU.MOREX.r2.5HG0399460	Early light-induced protein
HORVU.MOREX.r2.7HG0608800	Early nodulin-like protein
HORVU.MOREX.r2.1HG0019450	EGG APPARATUS-1 protein
HORVU.MOREX.r2.1HG0034310	electron protein, putative (Protein of unknown function, DUF547)
HORVU.MOREX.r2.1HG0046140	electron transporter, putative (Protein of unknown function, DUF547)
HORVU.MOREX.r2.2HG0087760	Elongation factor 1 alpha
HORVU.MOREX.r2.2HG0088510	Elongation factor 1-alpha
HORVU.MOREX.r2.3HG0271980	Elongation factor 2
HORVU.MOREX.r2.3HG0240210	Elongation factor 4
HORVU.MOREX.r2.1HG0051040	Elongation factor 4
HORVU.MOREX.r2.6HG0467800	Elongation factor 4
HORVU.MOREX.r2.2HG0152840	Elongation factor G
HORVU.MOREX.r2.4HG0329270	Elongation factor G 1
HORVU.MOREX.r2.5HG0434260	Elongation factor P family protein, expressed
HORVU.MOREX.r2.5HG0397600	Elongation factor Tu
HORVU.MOREX.r2.6HG0466880	En/Spm transposon protein-like
HORVU.MOREX.r2.2HG0094880	Endo-1,4-beta-xylanase, putative, expressed
HORVU.MOREX.r2.7HG0554930	Endoglucanase
HORVU.MOREX.r2.2HG0162040	Enolase
HORVU.MOREX.r2.5HG0389920	Enoyl reductase
HORVU.MOREX.r2.1HG0068170	Enoyl-CoA isomerase
HORVU.MOREX.r2.3HG0261130	Ent-cassa-12,15-diene synthase
HORVU.MOREX.r2.7HG0613260	ENTH/ANTH/VHS superfamily protein
HORVU.MOREX.r2.7HG0551630	ENTH/VHS family protein
HORVU.MOREX.r2.6HG0526860	Epimerase family protein
HORVU.MOREX.r2.1HG0007020	Epoxide hydrolase
HORVU.MOREX.r2.2HG0172060	Epoxide hydrolase 2
HORVU.MOREX.r2.6HG0451760	Epoxide hydrolase 2
HORVU.MOREX.r2.5HG0359000	Epoxide hydrolase 2
HORVU.MOREX.r2.1HG0067260	epstein-barr nuclear antigen
HORVU.MOREX.r2.7HG0601090	ERD (early-responsive to dehydration stress) family protein
HORVU.MOREX.r2.2HG0120030	ERD (early-responsive to dehydration stress) family protein
HORVU.MOREX.r2.1HG0008570	Erect panicle 2 protein
HORVU.MOREX.r2.5HG0406680	ESSS subunit of NADH:ubiquinone oxidoreductase (Complex I) protein
HORVU.MOREX.r2.6HG0520480	Esterase/lipase/thioesterase-like protein
HORVU.MOREX.r2.4HG0333430	ethylene-responsive transcription factor
HORVU.MOREX.r2.6HG0495720	ethylene-responsive transcription factor
HORVU.MOREX.r2.6HG0513660	Ethylene-responsive transcription factor
HORVU.MOREX.r2.5HG0398860	Ethylene-responsive transcription factor
HORVU.MOREX.r2.2HG0157530	Ethylene-responsive transcription factor, putative
HORVU.MOREX.r2.7HG0620190	Eukaryotic aspartyl protease family protein
HORVU.MOREX.r2.3HG0243770	Eukaryotic aspartyl protease family protein
HORVU.MOREX.r2.7HG0572670	Eukaryotic translation initiation factor 3 subunit A
HORVU.MOREX.r2.2HG0139120	eukaryotic translation initiation factor 4A1
HORVU.MOREX.r2.2HG0147940	Eukaryotic translation initiation factor 4G
HORVU.MOREX.r2.7HG0595690	evolutionarily conserved C-terminal region 7
HORVU.MOREX.r2.7HG0551780	evolutionarily conserved C-terminal region 8
HORVU.MOREX.r2.6HG0509770	Exocyst complex component SEC6
HORVU.MOREX.r2.2HG0172670	Exocyst complex component, putative
HORVU.MOREX.r2.2HG0138210	Exocyst complex component, putative
HORVU.MOREX.r2.2HG0177790	Exocyst complex component, putative
HORVU.MOREX.r2.4HG0318040	Exostosin-like
HORVU.MOREX.r2.1HG0043700	Exostosin-like glycosyltransferase
HORVU.MOREX.r2.5HG0446800	Exportin-1
HORVU.MOREX.r2.3HG0213930	Exportin-7
HORVU.MOREX.r2.1HG0047940	F21O3.15 protein
HORVU.MOREX.r2.3HG0239610	FACT complex subunit SSRP1
HORVU.MOREX.r2.1HG0023130	FACT complex subunit SSRP1
HORVU.MOREX.r2.1HG0075680	FAD-binding Berberine family protein
HORVU.MOREX.r2.7HG0596110	FAD-binding Berberine family protein
HORVU.MOREX.r2.2HG0177190	FAD-binding Berberine family protein, putative
HORVU.MOREX.r2.4HG0325710	FAD-binding Berberine family protein, putative
HORVU.MOREX.r2.7HG0596200	FAD-binding Berberine family protein, putative
HORVU.MOREX.r2.6HG0521880	fanconi anemia group F protein (FANCF)
HORVU.MOREX.r2.6HG0475620	FAR1 family, putative
HORVU.MOREX.r2.2HG0168420	Farnesyl pyrophosphate synthase
HORVU.MOREX.r2.3HG0229120	fatty acid biosynthesis 1
HORVU.MOREX.r2.5HG0392870	Fatty acid desaturase, putative
HORVU.MOREX.r2.3HG0201860	Fatty acid oxidation complex subunit alpha
HORVU.MOREX.r2.3HG0260320	Fatty acid oxidation complex subunit alpha
HORVU.MOREX.r2.3HG0230060	Fatty acid oxidation complex subunit alpha
HORVU.MOREX.r2.3HG0201850	Fatty acid oxidation complex subunit alpha
HORVU.MOREX.r2.7HG0598950	Fatty acyl-CoA reductase
HORVU.MOREX.r2.3HG0272050	FBD-associated F-box protein
HORVU.MOREX.r2.3HG0272040	FBD-associated F-box protein
HORVU.MOREX.r2.1HG0014610	FBD-associated F-box protein
HORVU.MOREX.r2.6HG0517910	FBD-associated F-box protein
HORVU.MOREX.r2.4HG0329140	FBD-associated F-box protein
HORVU.MOREX.r2.6HG0463950	FBD-associated F-box protein
HORVU.MOREX.r2.7HG0606690	F-box and JmjC domain-containing protein
HORVU.MOREX.r2.5HG0429460	F-box and Leucine Rich Repeat domains containing protein
HORVU.MOREX.r2.6HG0511420	F-box domain containing protein
HORVU.MOREX.r2.1HG0030220	F-box domain containing protein
HORVU.MOREX.r2.6HG0453250	F-box domain containing protein
HORVU.MOREX.r2.6HG0453260	F-box domain containing protein, expressed
HORVU.MOREX.r2.1HG0041590	F-box family protein
HORVU.MOREX.r2.2HG0090490	F-box family protein
HORVU.MOREX.r2.7HG0591180	F-box family protein
HORVU.MOREX.r2.2HG0177540	F-box family protein
HORVU.MOREX.r2.5HG0408560	F-box family protein
HORVU.MOREX.r2.2HG0087100	F-box family protein
HORVU.MOREX.r2.6HG0511370	F-box family protein
HORVU.MOREX.r2.6HG0511410	F-box family protein
HORVU.MOREX.r2.1HG0030210	F-box family protein
HORVU.MOREX.r2.5HG0365400	F-box family protein
HORVU.MOREX.r2.6HG0456850	F-box family protein
HORVU.MOREX.r2.6HG0455840	F-box family protein
HORVU.MOREX.r2.3HG0210300	F-box family protein
HORVU.MOREX.r2.4HG0328030	F-box family protein
HORVU.MOREX.r2.1HG0029650	F-box family protein
HORVU.MOREX.r2.6HG0515190	F-box family protein
HORVU.MOREX.r2.5HG0422480	F-box family protein
HORVU.MOREX.r2.5HG0428220	F-box family protein
HORVU.MOREX.r2.5HG0423690	F-box family protein
HORVU.MOREX.r2.1HG0041600	F-box family protein
HORVU.MOREX.r2.3HG0189090	F-box family protein-like
HORVU.MOREX.r2.3HG0248580	F-box protein
HORVU.MOREX.r2.1HG0016870	F-box protein
HORVU.MOREX.r2.2HG0147280	F-box protein
HORVU.MOREX.r2.2HG0119390	F-box protein
HORVU.MOREX.r2.3HG0228390	F-box protein
HORVU.MOREX.r2.5HG0363960	F-box protein
HORVU.MOREX.r2.5HG0413380	F-box protein
HORVU.MOREX.r2.7HG0619610	F-box protein PP2
HORVU.MOREX.r2.7HG0619500	F-box protein PP2
HORVU.MOREX.r2.7HG0592630	F-box protein PP2
HORVU.MOREX.r2.5HG0350400	F-box/associated interaction domain protein
HORVU.MOREX.r2.5HG0418950	F-box/kelch-repeat protein
HORVU.MOREX.r2.6HG0479220	F-box/kelch-repeat protein
HORVU.MOREX.r2.5HG0360130	F-box/LRR protein, putative
HORVU.MOREX.r2.4HG0340750	F-box/LRR-repeat protein
HORVU.MOREX.r2.3HG0193990	F-box/LRR-repeat protein
HORVU.MOREX.r2.7HG0617980	F-box/RNI-like/FBD-like domains-containing protein
HORVU.MOREX.r2.4HG0277710	Ferredoxin
HORVU.MOREX.r2.5HG0429110	Ferredoxin--NADP reductase
HORVU.MOREX.r2.6HG0449560	Ferredoxin--NADP reductase
HORVU.MOREX.r2.5HG0350570	fiber (DUF1218)
HORVU.MOREX.r2.3HG0257630	Fiber protein Fb34
HORVU.MOREX.r2.1HG0036500	Fiber protein Fb34
HORVU.MOREX.r2.7HG0591330	Fiber protein Fb34
HORVU.MOREX.r2.4HG0298020	Fibronectin type III domain-containing protein 5
HORVU.MOREX.r2.2HG0117570	Filament-like plant protein
HORVU.MOREX.r2.1HG0016900	filament-like protein (DUF869)
HORVU.MOREX.r2.4HG0327900	Flap endonuclease 1
HORVU.MOREX.r2.2HG0085370	Flavin-containing monooxygenase
HORVU.MOREX.r2.6HG0526180	Flavin-containing monooxygenase
HORVU.MOREX.r2.2HG0170570	Flavin-containing monooxygenase
HORVU.MOREX.r2.7HG0623220	Flavin-containing monooxygenase
HORVU.MOREX.r2.3HG0203250	Flowering locus T
HORVU.MOREX.r2.2HG0109070	FMN binding
HORVU.MOREX.r2.5HG0363270	FolD bifunctional protein
HORVU.MOREX.r2.7HG0562800	Follistatin-related protein 1
HORVU.MOREX.r2.6HG0510920	Formin-like protein
HORVU.MOREX.r2.1HG0068570	FRIGIDA-like protein
HORVU.MOREX.r2.3HG0250000	Fructose-1,6-bisphosphatase class 1
HORVU.MOREX.r2.4HG0291220	Fructose-bisphosphate aldolase
HORVU.MOREX.r2.6HG0475110	Fumarylacetoacetase
HORVU.MOREX.r2.5HG0375460	Gag-pol polyprotein
HORVU.MOREX.r2.6HG0463510	Galactokinase
HORVU.MOREX.r2.5HG0392520	Galactose mutarotase-like superfamily protein
HORVU.MOREX.r2.5HG0416180	Galactose oxidase/kelch repeat superfamily protein
HORVU.MOREX.r2.3HG0250570	GATA zinc finger domain-containing protein C1393.08 isoform 2
HORVU.MOREX.r2.5HG0357040	GDP-L-galactose phosphorylase 1
HORVU.MOREX.r2.5HG0439040	GDP-mannose transporter
HORVU.MOREX.r2.7HG0586000	GDP-mannose transporter
HORVU.MOREX.r2.1HG0073250	GDP-mannose-3',5'-epimerase
HORVU.MOREX.r2.3HG0215730	Genome polyprotein
HORVU.MOREX.r2.4HG0287640	Gibberellin receptor GID1A
HORVU.MOREX.r2.2HG0104280	Gibberellin receptor GID1A
HORVU.MOREX.r2.2HG0098130	Gibberellin receptor GID1A
HORVU.MOREX.r2.1HG0076230	Glucan endo-1,3-beta-glucosidase 3
HORVU.MOREX.r2.5HG0386120	Glucan endo-1,3-beta-glucosidase, putative
HORVU.MOREX.r2.1HG0046190	glucan synthase-like 10
HORVU.MOREX.r2.7HG0577820	Glucose-1-phosphate adenylyltransferase
HORVU.MOREX.r2.2HG0146170	Glucose-6-phosphate 1-dehydrogenase
HORVU.MOREX.r2.5HG0404130	Glucose-6-phosphate isomerase
HORVU.MOREX.r2.1HG0005340	Glucose-6-phosphate isomerase
HORVU.MOREX.r2.2HG0119420	Glucose-methanol-choline (GMC) oxidoreductase family protein
HORVU.MOREX.r2.3HG0267830	Glucuronoxylan 4-O-methyltransferase
HORVU.MOREX.r2.1HG0065120	Glucuronoxylan 4-O-methyltransferase
HORVU.MOREX.r2.1HG0023880	Glutamate 5-kinase
HORVU.MOREX.r2.4HG0282010	Glutamate decarboxylase
HORVU.MOREX.r2.2HG0153500	Glutamate dehydrogenase
HORVU.MOREX.r2.5HG0399370	Glutamate receptor
HORVU.MOREX.r2.6HG0454350	Glutamate receptor
HORVU.MOREX.r2.5HG0354930	glutamate receptor 3.3
HORVU.MOREX.r2.5HG0359610	Glutamate-1-semialdehyde 2,1-aminomutase
HORVU.MOREX.r2.6HG0508460	Glutamine synthetase
HORVU.MOREX.r2.5HG0389650	glutamine synthetase 2
HORVU.MOREX.r2.5HG0403250	Glutamyl-tRNA(Gln) amidotransferase subunit A
HORVU.MOREX.r2.3HG0265240	Glutamyl-tRNA(Gln) amidotransferase subunit A
HORVU.MOREX.r2.3HG0195990	Glutaredoxin
HORVU.MOREX.r2.1HG0072380	Glutaredoxin, putative
HORVU.MOREX.r2.4HG0340780	Glutathione S-transferase
HORVU.MOREX.r2.3HG0241930	Glutathione S-transferase
HORVU.MOREX.r2.7HG0619090	Glutathione S-transferase
HORVU.MOREX.r2.2HG0098340	Glutathione S-transferase
HORVU.MOREX.r2.7HG0553600	Glutathione S-transferase
HORVU.MOREX.r2.3HG0246680	Glutathione S-transferase T3
HORVU.MOREX.r2.6HG0507430	Glyceraldehyde-3-phosphate dehydrogenase
HORVU.MOREX.r2.6HG0473830	Glyceraldehyde-3-phosphate dehydrogenase
HORVU.MOREX.r2.4HG0318120	Glyceraldehyde-3-phosphate dehydrogenase
HORVU.MOREX.r2.2HG0143170	Glyceraldehyde-3-phosphate dehydrogenase
HORVU.MOREX.r2.2HG0088820	Glyceraldehyde-3-phosphate dehydrogenase 1, cytosolic
HORVU.MOREX.r2.6HG0505130	Glycerol-3-phosphate dehydrogenase [NAD(P)+]
HORVU.MOREX.r2.2HG0135050	Glycerophosphodiester phosphodiesterase
HORVU.MOREX.r2.3HG0246920	Glycerophosphodiester phosphodiesterase
HORVU.MOREX.r2.1HG0020800	Glycerophosphodiester phosphodiesterase
HORVU.MOREX.r2.6HG0477350	Glycerophosphodiester phosphodiesterase
HORVU.MOREX.r2.1HG0058810	Glycine-rich family protein
HORVU.MOREX.r2.7HG0613940	Glycine-rich family protein
HORVU.MOREX.r2.1HG0050610	Glycine-rich protein, putative
HORVU.MOREX.r2.7HG0568920	Glycine--tRNA ligase
HORVU.MOREX.r2.6HG0482250	Glycine-tRNA ligase, alpha subunit
HORVU.MOREX.r2.3HG0189110	Glycogen synthase
HORVU.MOREX.r2.1HG0043730	Glycosyl transferase, family 1
HORVU.MOREX.r2.5HG0412150	Glycosyltransferase
HORVU.MOREX.r2.6HG0450240	Glycosyltransferase
HORVU.MOREX.r2.4HG0280390	Glycosyltransferase
HORVU.MOREX.r2.7HG0553130	Glycosyltransferase
HORVU.MOREX.r2.7HG0592970	Glycosyltransferase
HORVU.MOREX.r2.2HG0097510	Glycosyltransferase
HORVU.MOREX.r2.3HG0184120	Glycosyltransferase
HORVU.MOREX.r2.5HG0435460	Glycosyltransferase
HORVU.MOREX.r2.5HG0381170	Glycosyltransferase
HORVU.MOREX.r2.1HG0051440	Glycosyltransferase
HORVU.MOREX.r2.4HG0280330	Glycosyltransferase
HORVU.MOREX.r2.1HG0067720	Glycosyltransferase
HORVU.MOREX.r2.2HG0170590	Glycosyltransferase
HORVU.MOREX.r2.7HG0564710	Glycosyltransferase
HORVU.MOREX.r2.3HG0199730	Glycosyltransferase
HORVU.MOREX.r2.4HG0285590	Glycosyltransferase family 92 protein
HORVU.MOREX.r2.4HG0286780	Glycosyltransferase family 92 protein
HORVU.MOREX.r2.6HG0475490	Glycosyltransferase family 92 protein
HORVU.MOREX.r2.6HG0512610	Glycosyltransferase family 92 protein
HORVU.MOREX.r2.2HG0082350	Glyoxylate reductase/hydroxypyruvate reductase
HORVU.MOREX.r2.3HG0259080	GMP synthase [glutamine-hydrolyzing]
HORVU.MOREX.r2.1HG0034900	Golgi apparatus membrane protein tvp18
HORVU.MOREX.r2.2HG0128020	Golgin
HORVU.MOREX.r2.4HG0342950	golgin family A protein
HORVU.MOREX.r2.6HG0459080	GPI inositol-deacylase
HORVU.MOREX.r2.2HG0104740	GPI transamidase subunit PIG-U family protein
HORVU.MOREX.r2.2HG0152160	GPI-anchored wall transfer protein 1
HORVU.MOREX.r2.3HG0224090	G-protein coupled receptor family C group 6 member A
HORVU.MOREX.r2.2HG0119410	GRAM domain family protein
HORVU.MOREX.r2.7HG0580440	GroES-like zinc-binding alcohol dehydrogenase family protein
HORVU.MOREX.r2.2HG0149380	GTF2H2
HORVU.MOREX.r2.5HG0360530	GTP 3',8-cyclase
HORVU.MOREX.r2.2HG0167220	GTP cyclohydrolase 1
HORVU.MOREX.r2.5HG0350930	GTPase family protein
HORVU.MOREX.r2.2HG0093950	GTPase obg
HORVU.MOREX.r2.4HG0282980	GTPase obg
HORVU.MOREX.r2.5HG0402860	GTPase-activating protein pac-1
HORVU.MOREX.r2.4HG0328440	GTP-binding protein
HORVU.MOREX.r2.5HG0422710	guanine nucleotide-binding protein subunit gamma
HORVU.MOREX.r2.3HG0194920	Guanine-nucleotide-exchange protein
HORVU.MOREX.r2.4HG0316470	Guanylate kinase
HORVU.MOREX.r2.5HG0370710	Guanylate kinase
HORVU.MOREX.r2.5HG0431750	Guanylate-binding family protein, putative, expressed
HORVU.MOREX.r2.3HG0196740	Harbinger transposase-derived nuclease
HORVU.MOREX.r2.3HG0201580	HAT family dimerisation domain containing protein
HORVU.MOREX.r2.7HG0573450	HAUS augmin-like complex subunit 1
HORVU.MOREX.r2.1HG0025250	Heat shock 70 kDa protein 4L
HORVU.MOREX.r2.6HG0514560	Heat shock cognate 70 kDa protein 1
HORVU.MOREX.r2.3HG0238180	Heat shock transcription factor
HORVU.MOREX.r2.2HG0111180	Heat shock transcription factor
HORVU.MOREX.r2.5HG0431380	Heat shock transcription factor
HORVU.MOREX.r2.5HG0446090	Heat shock transcription factor
HORVU.MOREX.r2.1HG0068990	Heat shock transcription factor
HORVU.MOREX.r2.6HG0513340	Heat stress transcription factor A-2c, putative
HORVU.MOREX.r2.1HG0025700	heat-inducible transcription repressor
HORVU.MOREX.r2.5HG0397410	Heavy metal transport/detoxification protein
HORVU.MOREX.r2.5HG0437140	Heavy metal transport/detoxification superfamily protein
HORVU.MOREX.r2.3HG0261930	Heavy metal transport/detoxification superfamily protein, putative
HORVU.MOREX.r2.5HG0417920	Heavy metal-associated protein
HORVU.MOREX.r2.4HG0317730	Heme binding
HORVU.MOREX.r2.6HG0468120	Hemoglobin subunit alpha-A
HORVU.MOREX.r2.6HG0524550	Heterogeneous nuclear ribonucleoprotein D-like
HORVU.MOREX.r2.2HG0172360	Heterogeneous nuclear ribonucleoprotein U-like protein 1
HORVU.MOREX.r2.4HG0278540	Hexokinase-2
HORVU.MOREX.r2.1HG0069320	Hexosyltransferase
HORVU.MOREX.r2.5HG0402410	Hexosyltransferase
HORVU.MOREX.r2.2HG0156660	Hexosyltransferase
HORVU.MOREX.r2.7HG0553660	Hexosyltransferase
HORVU.MOREX.r2.6HG0489990	High affinity nitrate transporter
HORVU.MOREX.r2.4HG0276210	High mobility group protein
HORVU.MOREX.r2.6HG0479380	Histone deacetylase
HORVU.MOREX.r2.7HG0570380	histone deacetylase complex subunit
HORVU.MOREX.r2.1HG0074930	histone deacetylase-like protein
HORVU.MOREX.r2.7HG0535390	Histone H1
HORVU.MOREX.r2.2HG0154580	Histone H1
HORVU.MOREX.r2.5HG0417720	Histone H4
HORVU.MOREX.r2.5HG0379520	histone-lysine N-methyltransferase
HORVU.MOREX.r2.2HG0120970	Histone-lysine N-methyltransferase
HORVU.MOREX.r2.6HG0522860	Histone-lysine N-methyltransferase 2B
HORVU.MOREX.r2.6HG0494890	histone-lysine N-methyltransferase SUVR2-like protein
HORVU.MOREX.r2.7HG0551870	Homeobox leucine zipper protein
HORVU.MOREX.r2.5HG0397610	Homeobox leucine-zipper protein
HORVU.MOREX.r2.1HG0063360	Homeobox protein knotted-1-like 3
HORVU.MOREX.r2.2HG0161550	Homeobox-leucine zipper family protein / lipid-binding START domain-containing protein
HORVU.MOREX.r2.7HG0596490	Homocysteine-responsive endoplasmic reticulum-resident ubiquitin-like domain member 1 protein
HORVU.MOREX.r2.7HG0614050	Homogentisate phytyltransferase
HORVU.MOREX.r2.3HG0245280	HTH-type transcriptional activator RhaR
HORVU.MOREX.r2.6HG0486720	HTH-type transcriptional regulator ArgP
HORVU.MOREX.r2.5HG0361750	HVA22-like protein
HORVU.MOREX.r2.6HG0510030	HVA22-like protein
HORVU.MOREX.r2.1HG0060090	HXXXD-type acyl-transferase family protein
HORVU.MOREX.r2.4HG0291330	Hyccin
HORVU.MOREX.r2.4HG0321040	Hydrolase family protein / HAD-superfamily protein
HORVU.MOREX.r2.4HG0336930	Hydrolase, alpha/beta fold family protein, expressed
HORVU.MOREX.r2.6HG0492080	Hydroxycinnamoyl-CoA shikimate/quinate hydroxycinnamoyltransferase
HORVU.MOREX.r2.7HG0620250	Hydroxycinnamoyl-CoA shikimate/quinate hydroxycinnamoyltransferase
HORVU.MOREX.r2.5HG0445480	Hydroxyproline-rich glycoprotein family protein
HORVU.MOREX.r2.1HG0055270	Hydroxyproline-rich glycoprotein family protein, putative
HORVU.MOREX.r2.6HG0524020	Hydroxyproline-rich glycoprotein-like
HORVU.MOREX.r2.5HG0384630	Hypoxia-responsive family protein
HORVU.MOREX.r2.2HG0180380	Importin beta 1
HORVU.MOREX.r2.5HG0359110	Importin subunit beta-1
HORVU.MOREX.r2.5HG0387660	Inosine-5'-monophosphate dehydrogenase
HORVU.MOREX.r2.2HG0080380	Inosine-5'-monophosphate dehydrogenase
HORVU.MOREX.r2.4HG0282650	Inositol-tetrakisphosphate 1-kinase
HORVU.MOREX.r2.1HG0041780	Inositol-tetrakisphosphate 1-kinase
HORVU.MOREX.r2.6HG0526170	integral membrane metal-binding family protein (DUF2296)
HORVU.MOREX.r2.7HG0607210	integral membrane protein (Protein of unknown function DUF92, transmembrane)
HORVU.MOREX.r2.5HG0359200	Inter-alpha-trypsin inhibitor heavy chain, putative
HORVU.MOREX.r2.3HG0223860	intracellular protein transporter
HORVU.MOREX.r2.7HG0589030	Intracellular protein transporter USO1-like protein
HORVU.MOREX.r2.5HG0367250	Invertase/pectin methylesterase inhibitor family protein
HORVU.MOREX.r2.5HG0443030	Ion channel DMI1
HORVU.MOREX.r2.3HG0249460	Ion channel DMI1
HORVU.MOREX.r2.7HG0584630	IQ domain-containing protein
HORVU.MOREX.r2.1HG0021190	isocitrate dehydrogenase subunit 2
HORVU.MOREX.r2.7HG0561880	Isoflavone reductase
HORVU.MOREX.r2.1HG0052930	Isopentenyl-diphosphate delta-isomerase
HORVU.MOREX.r2.2HG0113780	Isopentenyl-diphosphate delta-isomerase
HORVU.MOREX.r2.7HG0599910	Isopentenyl-diphosphate Delta-isomerase II
HORVU.MOREX.r2.5HG0406450	JmjC domain-containing protein 7
HORVU.MOREX.r2.5HG0444630	K-box region and MADS-box transcription factor family protein
HORVU.MOREX.r2.5HG0388540	Kelch repeat containing protein
HORVU.MOREX.r2.7HG0592850	Kelch repeat protein
HORVU.MOREX.r2.5HG0400030	Keratin, type II cytoskeletal 8
HORVU.MOREX.r2.1HG0035700	KH domain-containing protein
HORVU.MOREX.r2.1HG0056730	Killer cell immunoglobulin-like receptor 2DS1
HORVU.MOREX.r2.2HG0128260	Kinase
HORVU.MOREX.r2.5HG0410620	Kinase family protein
HORVU.MOREX.r2.1HG0061250	Kinase family protein
HORVU.MOREX.r2.2HG0120910	Kinase family protein
HORVU.MOREX.r2.3HG0194610	Kinase family protein
HORVU.MOREX.r2.2HG0094420	Kinase family protein
HORVU.MOREX.r2.2HG0139050	Kinase family protein
HORVU.MOREX.r2.3HG0255010	Kinase family protein
HORVU.MOREX.r2.1HG0064470	Kinase family protein
HORVU.MOREX.r2.6HG0497500	Kinase family protein
HORVU.MOREX.r2.1HG0043710	Kinase family protein isoform 2
HORVU.MOREX.r2.5HG0422570	Kinase interacting (KIP1-like) family protein, putative
HORVU.MOREX.r2.1HG0043170	kinase superfamily with octicosapeptide/Phox/Bem1p domain-containing protein
HORVU.MOREX.r2.4HG0341130	Kinase, putative
HORVU.MOREX.r2.6HG0520620	Kinase, putative
HORVU.MOREX.r2.4HG0281170	Kinase, putative
HORVU.MOREX.r2.5HG0357880	Kinase, putative
HORVU.MOREX.r2.1HG0057120	Kinase-like protein
HORVU.MOREX.r2.1HG0051090	Kinesin heavy chain
HORVU.MOREX.r2.3HG0211130	Kinesin, putative
HORVU.MOREX.r2.7HG0584330	Kinesin-like protein
HORVU.MOREX.r2.2HG0132010	Kinesin-like protein
HORVU.MOREX.r2.5HG0354770	Kinesin-like protein
HORVU.MOREX.r2.5HG0439020	Kinetochore protein NDC80
HORVU.MOREX.r2.2HG0169070	Kunitz/BPTI-like toxin
HORVU.MOREX.r2.5HG0387310	Kynurenine formamidase
HORVU.MOREX.r2.6HG0461770	Laminin subunit gamma-1
HORVU.MOREX.r2.4HG0282600	Lariat debranching enzyme
HORVU.MOREX.r2.6HG0461080	L-aspartate oxidase
HORVU.MOREX.r2.7HG0586990	Late embryogenesis abundant (LEA) hydroxyproline-rich glycoprotein family
HORVU.MOREX.r2.5HG0383330	Late embryogenesis abundant (LEA) hydroxyproline-rich glycoprotein family
HORVU.MOREX.r2.7HG0572350	Late embryogenesis abundant (LEA) hydroxyproline-rich glycoprotein family
HORVU.MOREX.r2.1HG0067870	Late embryogenesis abundant hydroxyproline-rich glycoprotein family, putative
HORVU.MOREX.r2.5HG0361820	lateral signaling target-like protein (Protein of unknown function, DUF593)
HORVU.MOREX.r2.4HG0328470	Lecithin-cholesterol acyltransferase-like 1
HORVU.MOREX.r2.2HG0089490	Lectin receptor kinase
HORVU.MOREX.r2.2HG0089480	Lectin receptor kinase
HORVU.MOREX.r2.2HG0082250	Lectin receptor kinase
HORVU.MOREX.r2.5HG0379560	Leucine-rich PPR motif-containing protein, mitochondrial
HORVU.MOREX.r2.3HG0188780	Leucine-rich receptor-like protein kinase family protein
HORVU.MOREX.r2.5HG0386760	Leucine-rich repeat protein kinase family protein
HORVU.MOREX.r2.7HG0611940	Leucine-rich repeat receptor-like protein kinase
HORVU.MOREX.r2.5HG0437960	Leucine-rich repeat receptor-like protein kinase family protein
HORVU.MOREX.r2.1HG0077300	Leucine-rich repeat receptor-like protein kinase family protein
HORVU.MOREX.r2.7HG0531400	Leucine-rich repeat receptor-like protein kinase family protein
HORVU.MOREX.r2.6HG0467380	Leucine-rich repeat receptor-like protein kinase family protein
HORVU.MOREX.r2.6HG0468730	Leucine-rich repeat receptor-like protein kinase family protein, putative
HORVU.MOREX.r2.5HG0353860	Leucine-rich repeat receptor-like protein kinase family protein, putative
HORVU.MOREX.r2.3HG0258230	Leucine-rich repeat transmembrane protein kinase
HORVU.MOREX.r2.3HG0272130	Leucine-rich repeat-containing protein 1
HORVU.MOREX.r2.6HG0477620	Leukotoxin translocation ATP-binding protein LktB
HORVU.MOREX.r2.1HG0057950	LIGHT-DEPENDENT SHORT HYPOCOTYLS-like protein (DUF640)
HORVU.MOREX.r2.2HG0138440	LINE-1 reverse transcriptase
HORVU.MOREX.r2.2HG0142120	LINE-1 reverse transcriptase like
HORVU.MOREX.r2.4HG0343340	LINE-1 reverse transcriptase like
HORVU.MOREX.r2.7HG0598990	Lipase
HORVU.MOREX.r2.1HG0025840	lipase, putative (DUF620)
HORVU.MOREX.r2.4HG0316130	Lipid transfer protein
HORVU.MOREX.r2.6HG0501230	Lipid transfer protein-like
HORVU.MOREX.r2.3HG0232310	Lipoprotein-releasing system ATP-binding protein LolD
HORVU.MOREX.r2.1HG0044730	Lipoxygenase
HORVU.MOREX.r2.5HG0371750	Lipoyl synthase
HORVU.MOREX.r2.6HG0459120	L-lactate dehydrogenase
HORVU.MOREX.r2.2HG0090250	Lon protease homolog
HORVU.MOREX.r2.5HG0443640	Long-chain-fatty-acid CoA ligase, putative
HORVU.MOREX.r2.7HG0597150	Loricrin-like
HORVU.MOREX.r2.4HG0310410	Low molecular weight protein antigen 6
HORVU.MOREX.r2.1HG0055570	LOW protein: E3 ubiquitin ligase-like protein
HORVU.MOREX.r2.6HG0497080	LRR and NB-ARC domains-containing disease resistance protein
HORVU.MOREX.r2.1HG0056720	LURP-one-like protein
HORVU.MOREX.r2.3HG0247360	LURP-one-like protein
HORVU.MOREX.r2.3HG0218920	LYR motif-containing protein 7 isoform 2
HORVU.MOREX.r2.6HG0515810	Lysine ketoglutarate reductase/saccharopine dehydrogenase
HORVU.MOREX.r2.7HG0581950	Lysine-specific histone demethylase 1-like protein
HORVU.MOREX.r2.4HG0279680	Lysine--tRNA ligase
HORVU.MOREX.r2.7HG0596120	Lysophospholipase NTE1
HORVU.MOREX.r2.7HG0616510	Lysosomal Pro-X carboxypeptidase
HORVU.MOREX.r2.7HG0555290	MACPF domain-containing protein
HORVU.MOREX.r2.3HG0249560	Magnesium transporter MRS2-like protein
HORVU.MOREX.r2.3HG0249000	magnesium transporter NIPA (DUF803)
HORVU.MOREX.r2.4HG0347310	Major facilitator superfamily domain-containing protein
HORVU.MOREX.r2.1HG0074840	Malate dehydrogenase
HORVU.MOREX.r2.2HG0146360	Malate synthase
HORVU.MOREX.r2.5HG0384190	Mannan endo-1,4-beta-mannosidase-like protein
HORVU.MOREX.r2.5HG0383800	Mannose-P-dolichol utilization defect 1 protein
HORVU.MOREX.r2.5HG0355540	Mannosyltransferase
HORVU.MOREX.r2.2HG0145110	MAPK/ERK kinase kinase 3
HORVU.MOREX.r2.3HG0242520	Maternal effect embryo arrest protein
HORVU.MOREX.r2.5HG0364660	Matrix metalloproteinase-16
HORVU.MOREX.r2.1HG0044930	Maturase
HORVU.MOREX.r2.7HG0563770	Maturase K
HORVU.MOREX.r2.6HG0488750	Maturase K
HORVU.MOREX.r2.1HG0026140	MBOAT (membrane bound O-acyl transferase) family protein
HORVU.MOREX.r2.6HG0458520	Mechanosensitive ion channel
HORVU.MOREX.r2.6HG0499610	Mechanosensitive ion channel family protein
HORVU.MOREX.r2.1HG0036810	Mediator of RNA polymerase II transcription subunit 16
HORVU.MOREX.r2.5HG0443280	Membrane protein insertase YidC
HORVU.MOREX.r2.1HG0039830	Membrane protein insertase YidC
HORVU.MOREX.r2.1HG0047590	Membrane protein insertase YidC
HORVU.MOREX.r2.3HG0191640	Membrane protein insertase YidC
HORVU.MOREX.r2.3HG0260310	Metabotropic glutamate receptor 2
HORVU.MOREX.r2.1HG0055200	Metacaspase
HORVU.MOREX.r2.1HG0045370	Metacaspase-1
HORVU.MOREX.r2.3HG0200540	Metallothiol transferase fosB
HORVU.MOREX.r2.3HG0265460	Methionine S-methyltransferase
HORVU.MOREX.r2.6HG0493080	methyl-coenzyme M reductase II subunit gamma, putative (DUF3741)
HORVU.MOREX.r2.4HG0338940	methyl-coenzyme M reductase II subunit gamma, putative (DUF3741)
HORVU.MOREX.r2.7HG0565790	Methyl-CpG-binding domain protein
HORVU.MOREX.r2.5HG0436080	Methylenetetrahydrofolate reductase
HORVU.MOREX.r2.4HG0284080	Methyltransferase
HORVU.MOREX.r2.7HG0555620	Methyltransferase-like protein
HORVU.MOREX.r2.4HG0292440	Methyltransferase-like protein 13
HORVU.MOREX.r2.7HG0559900	Microtubule associated family protein
HORVU.MOREX.r2.2HG0128480	Microtubule-associated protein futsch
HORVU.MOREX.r2.6HG0512620	microtubule-associated proteins 65-1
HORVU.MOREX.r2.6HG0511520	minichromosome maintenance (MCM2/3/5) family protein
HORVU.MOREX.r2.7HG0571320	Minichromosome maintenance (MCM2/3/5) family protein
HORVU.MOREX.r2.2HG0131910	Mis18-binding protein 1
HORVU.MOREX.r2.7HG0600050	Mitochondrial 39S ribosomal protein L53
HORVU.MOREX.r2.3HG0223650	Mitochondrial ATP synthase g subunit family protein
HORVU.MOREX.r2.4HG0319280	Mitochondrial carrier protein, expressed
HORVU.MOREX.r2.3HG0216590	Mitochondrial carrier protein, expressed
HORVU.MOREX.r2.6HG0482490	Mitochondrial carrier protein-like
HORVU.MOREX.r2.3HG0184300	Mitochondrial dynamics protein MID51
HORVU.MOREX.r2.2HG0137320	Mitochondrial fission protein ELM1
HORVU.MOREX.r2.7HG0561080	Mitochondrial glycoprotein-like
HORVU.MOREX.r2.4HG0325480	Mitochondrial import inner membrane translocase subunit Tim21
HORVU.MOREX.r2.2HG0078910	Mitochondrial inner membrane protease subunit 1
HORVU.MOREX.r2.3HG0186100	Mitochondrial substrate carrier family protein
HORVU.MOREX.r2.1HG0052970	Mitochondrial transcription termination factor family protein
HORVU.MOREX.r2.2HG0171950	Mitochondrial transcription termination factor family protein
HORVU.MOREX.r2.2HG0108120	Mitochondrial transcription termination factor family protein
HORVU.MOREX.r2.6HG0451860	Mitochondrial transcription termination factor-like
HORVU.MOREX.r2.4HG0330320	Mitochondrial-processing peptidase beta subunit
HORVU.MOREX.r2.1HG0040860	Mitogen-activated protein kinase
HORVU.MOREX.r2.1HG0075930	Mitogen-activated protein kinase
HORVU.MOREX.r2.4HG0333330	Mitogen-activated protein kinase
HORVU.MOREX.r2.7HG0613950	MMS19 nucleotide excision repair protein-like protein
HORVU.MOREX.r2.2HG0167710	Molybdopterin biosynthesis protein CNX1
HORVU.MOREX.r2.7HG0527700	Monocopper oxidase-like protein SKU5
HORVU.MOREX.r2.3HG0193230	Monocopper oxidase-like protein SKU5
HORVU.MOREX.r2.4HG0289200	Monooxygenase, FAD-binding protein
HORVU.MOREX.r2.6HG0525520	Movement protein Hsp70h
HORVU.MOREX.r2.3HG0208160	mRNA cleavage and polyadenylation specificity factor complex subunit pta1
HORVU.MOREX.r2.5HG0397780	MTD1
HORVU.MOREX.r2.2HG0102020	Multifunctional methyltransferase subunit TRM112-like protein
HORVU.MOREX.r2.2HG0098060	Multifunctional-autoprocessing repeats-in-toxin
HORVU.MOREX.r2.1HG0069310	Multiple RNA-binding domain-containing protein 1
HORVU.MOREX.r2.5HG0413490	myb domain protein 33
HORVU.MOREX.r2.2HG0152390	MYB transcription factor
HORVU.MOREX.r2.3HG0251460	Myb transcription factor
HORVU.MOREX.r2.3HG0196650	MYB-RELATED transcription factor
HORVU.MOREX.r2.4HG0333190	Myo-inositol 1-phosphate synthase
HORVU.MOREX.r2.4HG0345300	myo-inositol-1-phosphate synthase 2
HORVU.MOREX.r2.1HG0066220	Myosin
HORVU.MOREX.r2.7HG0553090	Myosin
HORVU.MOREX.r2.2HG0157990	myosin heavy chain, embryonic smooth protein
HORVU.MOREX.r2.7HG0566110	Myosin heavy chain-like protein
HORVU.MOREX.r2.7HG0583890	NA
HORVU.MOREX.r2.6HG0507010	NA
HORVU.MOREX.r2.4HG0319900	NA
HORVU.MOREX.r2.2HG0173810	NA
HORVU.MOREX.r2.6HG0480110	NAC domain containing protein 17
HORVU.MOREX.r2.7HG0545690	NAC domain containing protein 84
HORVU.MOREX.r2.3HG0192020	NAC domain protein
HORVU.MOREX.r2.2HG0180700	NAC domain protein,
HORVU.MOREX.r2.2HG0126360	N-acetyl-D-glucosamine kinase
HORVU.MOREX.r2.4HG0342680	N-acetyltransferase
HORVU.MOREX.r2.6HG0520470	NAD kinase 1
HORVU.MOREX.r2.2HG0129580	NAD(P)H dehydrogenase (Quinone)
HORVU.MOREX.r2.3HG0261050	NAD(P)H dehydrogenase 18
HORVU.MOREX.r2.1HG0042190	NADH dehydrogenase [ubiquinone] 1 alpha subcomplex subunit 12
HORVU.MOREX.r2.2HG0098820	NADH dehydrogenase [ubiquinone] 1 alpha subcomplex subunit 6
HORVU.MOREX.r2.1HG0044190	NADH dehydrogenase 1 beta subcomplex subunit 8
HORVU.MOREX.r2.5HG0394270	NADH-quinone oxidoreductase subunit A
HORVU.MOREX.r2.5HG0404540	NADH-quinone oxidoreductase subunit C
HORVU.MOREX.r2.2HG0119860	NADH-ubiquinone oxidoreductase chain 5
HORVU.MOREX.r2.3HG0255890	NADP-dependent alkenal double bond reductase
HORVU.MOREX.r2.5HG0368440	NADP-dependent alkenal double bond reductase
HORVU.MOREX.r2.4HG0343790	Nascent polypeptide-associated complex alpha subunit, putative, expressed
HORVU.MOREX.r2.6HG0507000	NB-ARC domain-containing disease resistance protein
HORVU.MOREX.r2.2HG0161730	NBS-LRR disease resistance protein
HORVU.MOREX.r2.6HG0506990	NBS-LRR disease resistance protein
HORVU.MOREX.r2.7HG0546010	NBS-LRR disease resistance protein family-1
HORVU.MOREX.r2.5HG0394230	NBS-LRR disease resistance protein, putative, expressed
HORVU.MOREX.r2.2HG0161740	NBS-LRR disease resistance protein-like protein
HORVU.MOREX.r2.6HG0499060	NBS-LRR protein
HORVU.MOREX.r2.3HG0259170	NBS-LRR-like protein
HORVU.MOREX.r2.2HG0172170	NBS-LRR-like resistance protein
HORVU.MOREX.r2.3HG0237080	NBS-LRR-like resistance protein
HORVU.MOREX.r2.5HG0439270	NBS-LRR-like resistance protein
HORVU.MOREX.r2.7HG0600330	NBS-LRR-like resistance protein
HORVU.MOREX.r2.3HG0259160	NBS-LRR-like resistance protein
HORVU.MOREX.r2.6HG0512120	NF-X1 type zinc finger family protein
HORVU.MOREX.r2.2HG0156210	NHL domain protein
HORVU.MOREX.r2.7HG0617110	NHL domain-containing protein, putative
HORVU.MOREX.r2.4HG0329980	Ninja-family protein
HORVU.MOREX.r2.2HG0129410	Nipped-B-like protein
HORVU.MOREX.r2.7HG0599920	Nitrilase/cyanide hydratase and apolipoprotein N-acyltransferase family protein
HORVU.MOREX.r2.2HG0111350	Nodulation signaling protein 1
HORVU.MOREX.r2.5HG0440930	Nodulation signaling protein 1
HORVU.MOREX.r2.2HG0134360	Nodulin-like / Major Facilitator Superfamily protein
HORVU.MOREX.r2.5HG0432660	Nodulin-like / Major Facilitator Superfamily protein
HORVU.MOREX.r2.5HG0439210	Non specific phospholipase C
HORVU.MOREX.r2.1HG0032770	Non-lysosomal glucosylceramidase
HORVU.MOREX.r2.5HG0415090	nonsense-mediated mRNA decay-like protein
HORVU.MOREX.r2.5HG0359910	Non-specific serine/threonine protein kinase
HORVU.MOREX.r2.2HG0090860	Non-specific serine/threonine protein kinase
HORVU.MOREX.r2.6HG0475510	Non-structural maintenance of chromosome element 4
HORVU.MOREX.r2.7HG0562570	Nuclear factor Y subunit C
HORVU.MOREX.r2.3HG0238640	nuclear fusion defective 6
HORVU.MOREX.r2.3HG0251150	Nuclear pore complex protein
HORVU.MOREX.r2.4HG0328930	Nuclear pore complex protein Nup155
HORVU.MOREX.r2.5HG0426070	Nuclear pore complex protein NUP58
HORVU.MOREX.r2.3HG0226480	Nuclear receptor subfamily 6 group A member 1-B
HORVU.MOREX.r2.3HG0253310	Nuclear transcription factor Y subunit B
HORVU.MOREX.r2.5HG0409710	Nuclear transport factor 2
HORVU.MOREX.r2.2HG0132700	Nuclear transport factor 2 family protein with RNA binding domain
HORVU.MOREX.r2.4HG0295710	Nuclease
HORVU.MOREX.r2.3HG0194810	Nuclease
HORVU.MOREX.r2.2HG0169460	Nuclease S1
HORVU.MOREX.r2.3HG0184700	Nuclease S1
HORVU.MOREX.r2.5HG0396070	Nucleobase ascorbate transporter
HORVU.MOREX.r2.5HG0355840	Nucleolar and coiled-body phosphoprotein 1
HORVU.MOREX.r2.7HG0549020	Nucleolar GTP-binding protein 1
HORVU.MOREX.r2.4HG0309920	Nucleolar protein
HORVU.MOREX.r2.5HG0409330	Nucleolar protein 14
HORVU.MOREX.r2.5HG0373710	Nucleolar-like protein
HORVU.MOREX.r2.7HG0547420	Nucleoporin NUP188
HORVU.MOREX.r2.5HG0353100	nucleotidyltransferase
HORVU.MOREX.r2.1HG0024140	O-acyltransferase
HORVU.MOREX.r2.2HG0142620	Oberon-like protein
HORVU.MOREX.r2.4HG0335750	O-fucosyltransferase family protein
HORVU.MOREX.r2.5HG0404820	O-fucosyltransferase family protein
HORVU.MOREX.r2.5HG0417590	O-fucosyltransferase-like protein
HORVU.MOREX.r2.5HG0428900	O-Glycosyl hydrolases family 17 protein
HORVU.MOREX.r2.7HG0533390	Oligopeptide transporter
HORVU.MOREX.r2.1HG0073880	O-methyltransferase
HORVU.MOREX.r2.2HG0162850	Outer arm dynein light chain 1 protein
HORVU.MOREX.r2.6HG0475180	Outer envelope protein 80, chloroplastic
HORVU.MOREX.r2.1HG0058110	Outer envelope protein 80, chloroplastic
HORVU.MOREX.r2.1HG0050480	Oxidoreductase, 2OG-Fe(II) oxygenase family protein
HORVU.MOREX.r2.4HG0327170	Oxidoreductase, 2OG-Fe(II) oxygenase family protein
HORVU.MOREX.r2.3HG0192250	Oxidoreductase, aldo/keto reductase family protein, expressed
HORVU.MOREX.r2.5HG0390640	Oxygen-evolving enhancer protein 2, chloroplastic
HORVU.MOREX.r2.2HG0090870	PA-domain containing subtilase family protein
HORVU.MOREX.r2.5HG0423890	Pantothenate kinase, putative
HORVU.MOREX.r2.5HG0371130	PAS domain-containing protein tyrosine kinase family protein
HORVU.MOREX.r2.4HG0289260	patatin-like phospholipase domain protein
HORVU.MOREX.r2.3HG0274820	Pectin acetylesterase
HORVU.MOREX.r2.1HG0065140	Pectin lyase-like superfamily protein
HORVU.MOREX.r2.3HG0225730	Pectin lyase-like superfamily protein
HORVU.MOREX.r2.1HG0039600	Pectinesterase
HORVU.MOREX.r2.2HG0144220	Pentatricopeptide repeat (PPR) superfamily protein
HORVU.MOREX.r2.1HG0044990	Pentatricopeptide repeat (PPR) superfamily protein
HORVU.MOREX.r2.6HG0453590	Pentatricopeptide repeat superfamily protein
HORVU.MOREX.r2.1HG0018430	Pentatricopeptide repeat-containing family protein
HORVU.MOREX.r2.2HG0178550	Pentatricopeptide repeat-containing family protein
HORVU.MOREX.r2.7HG0601060	Pentatricopeptide repeat-containing family protein
HORVU.MOREX.r2.2HG0122910	Pentatricopeptide repeat-containing protein
HORVU.MOREX.r2.2HG0093880	Pentatricopeptide repeat-containing protein
HORVU.MOREX.r2.5HG0384680	Pentatricopeptide repeat-containing protein
HORVU.MOREX.r2.2HG0139350	Pentatricopeptide repeat-containing protein
HORVU.MOREX.r2.2HG0122900	Pentatricopeptide repeat-containing protein
HORVU.MOREX.r2.4HG0337840	Pentatricopeptide repeat-containing protein
HORVU.MOREX.r2.4HG0297740	Pentatricopeptide repeat-containing protein
HORVU.MOREX.r2.5HG0401220	Pentatricopeptide repeat-containing protein
HORVU.MOREX.r2.1HG0047690	Pentatricopeptide repeat-containing protein
HORVU.MOREX.r2.6HG0503920	Pentatricopeptide repeat-containing protein
HORVU.MOREX.r2.3HG0194640	Pentatricopeptide repeat-containing protein
HORVU.MOREX.r2.1HG0066810	Pentatricopeptide repeat-containing protein
HORVU.MOREX.r2.5HG0440540	Pentatricopeptide repeat-containing protein
HORVU.MOREX.r2.4HG0286930	Pentatricopeptide repeat-containing protein
HORVU.MOREX.r2.6HG0513250	Pentatricopeptide repeat-containing protein
HORVU.MOREX.r2.1HG0051710	Pentatricopeptide repeat-containing protein
HORVU.MOREX.r2.2HG0096290	Pentatricopeptide repeat-containing protein
HORVU.MOREX.r2.5HG0416160	Pentatricopeptide repeat-containing protein
HORVU.MOREX.r2.6HG0459690	Pentatricopeptide repeat-containing protein
HORVU.MOREX.r2.1HG0041930	Pentatricopeptide repeat-containing protein
HORVU.MOREX.r2.2HG0141750	Pentatricopeptide repeat-containing protein
HORVU.MOREX.r2.6HG0450130	Pentatricopeptide repeat-containing protein
HORVU.MOREX.r2.2HG0166060	Pentatricopeptide repeat-containing protein
HORVU.MOREX.r2.6HG0459670	Pentatricopeptide repeat-containing protein
HORVU.MOREX.r2.6HG0500710	Pentatricopeptide repeat-containing protein
HORVU.MOREX.r2.6HG0459250	Pentatricopeptide repeat-containing protein
HORVU.MOREX.r2.7HG0553110	Pentatricopeptide repeat-containing protein
HORVU.MOREX.r2.3HG0224600	Pentatricopeptide repeat-containing protein
HORVU.MOREX.r2.6HG0462480	Pentatricopeptide repeat-containing protein
HORVU.MOREX.r2.5HG0382350	Pentatricopeptide repeat-containing protein
HORVU.MOREX.r2.2HG0098520	Pentatricopeptide repeat-containing protein
HORVU.MOREX.r2.7HG0601680	Pentatricopeptide repeat-containing protein
HORVU.MOREX.r2.5HG0354600	Pentatricopeptide repeat-containing protein
HORVU.MOREX.r2.4HG0335620	Pentatricopeptide repeat-containing protein
HORVU.MOREX.r2.6HG0474410	Pentatricopeptide repeat-containing protein
HORVU.MOREX.r2.7HG0541220	Pentatricopeptide repeat-containing protein
HORVU.MOREX.r2.3HG0254870	Pentatricopeptide repeat-containing protein
HORVU.MOREX.r2.3HG0265400	Pentatricopeptide repeat-containing protein
HORVU.MOREX.r2.2HG0120750	Pentatricopeptide repeat-containing protein
HORVU.MOREX.r2.7HG0585070	Pentatricopeptide repeat-containing protein
HORVU.MOREX.r2.4HG0329710	Pentatricopeptide repeat-containing protein
HORVU.MOREX.r2.3HG0273150	Pentatricopeptide repeat-containing protein
HORVU.MOREX.r2.6HG0526090	Pentatricopeptide repeat-containing protein
HORVU.MOREX.r2.2HG0123120	Pentatricopeptide repeat-containing protein
HORVU.MOREX.r2.3HG0260130	Pentatricopeptide repeat-containing protein
HORVU.MOREX.r2.1HG0034560	Pentatricopeptide repeat-containing protein
HORVU.MOREX.r2.3HG0228740	Pentatricopeptide repeat-containing protein
HORVU.MOREX.r2.5HG0413990	Pentatricopeptide repeat-containing protein
HORVU.MOREX.r2.5HG0443090	Pentatricopeptide repeat-containing protein
HORVU.MOREX.r2.3HG0253460	Pentatricopeptide repeat-containing protein
HORVU.MOREX.r2.6HG0474030	Pentatricopeptide repeat-containing protein
HORVU.MOREX.r2.3HG0201550	Pentatricopeptide repeat-containing protein
HORVU.MOREX.r2.2HG0079640	Pentatricopeptide repeat-containing protein
HORVU.MOREX.r2.4HG0292240	Pentatricopeptide repeat-containing protein family
HORVU.MOREX.r2.4HG0331140	Pentatricopeptide repeat-containing protein, putative
HORVU.MOREX.r2.5HG0423700	Pentatricopeptide repeat-containing protein, putative
HORVU.MOREX.r2.1HG0033790	Pentatricopeptide repeat-containing protein, putative
HORVU.MOREX.r2.6HG0454770	Pentatricopeptide repeat-containing protein, putative
HORVU.MOREX.r2.2HG0143260	Pentatricopeptide repeat-containing protein, putative
HORVU.MOREX.r2.1HG0042020	Pentatricopeptide repeat-containing protein, putative
HORVU.MOREX.r2.4HG0310340	Peptidase C15, pyroglutamyl peptidase I-like protein
HORVU.MOREX.r2.3HG0256220	Peptide chain release factor 1
HORVU.MOREX.r2.3HG0220000	Peptide deformylase
HORVU.MOREX.r2.2HG0145670	Peptide methionine sulfoxide reductase MsrA
HORVU.MOREX.r2.7HG0590930	Peptide methionine sulfoxide reductase msrB
HORVU.MOREX.r2.3HG0204680	Peptide-N4-(N-acetyl-beta-glucosaminyl)asparagine amidase A
HORVU.MOREX.r2.3HG0204720	Peptide-N4-(N-acetyl-beta-glucosaminyl)asparagine amidase A
HORVU.MOREX.r2.6HG0512510	Peptidyl-prolyl cis-trans isomerase
HORVU.MOREX.r2.4HG0284340	Peptidyl-prolyl cis-trans isomerase
HORVU.MOREX.r2.3HG0206150	Peptidyl-prolyl cis-trans isomerase
HORVU.MOREX.r2.2HG0169360	Peptidyl-tRNA hydrolase, putative
HORVU.MOREX.r2.2HG0092740	Peroxiredoxin
HORVU.MOREX.r2.1HG0011710	peroxisomal ABC transporter 1
HORVU.MOREX.r2.5HG0446600	PGR5-like protein 1A, chloroplastic
HORVU.MOREX.r2.6HG0458530	PH domain-containing protein DDB_G0274775
HORVU.MOREX.r2.2HG0086400	PHD finger protein
HORVU.MOREX.r2.4HG0281670	PHD finger protein family
HORVU.MOREX.r2.5HG0419800	PHD-finger family protein, expressed
HORVU.MOREX.r2.5HG0419590	Phosphatase 2C family protein
HORVU.MOREX.r2.2HG0142110	Phosphatase 2C family protein
HORVU.MOREX.r2.6HG0513710	Phosphate carrier protein, mitochondrial
HORVU.MOREX.r2.5HG0434860	Phosphate transporter
HORVU.MOREX.r2.5HG0440550	Phosphate transporter protein
HORVU.MOREX.r2.1HG0058150	Phosphatidylethanolamine-binding protein
HORVU.MOREX.r2.1HG0044800	Phosphatidylinositol N-acetylglucosaminyltransferase subunit P
HORVU.MOREX.r2.7HG0552500	Phosphatidylinositol:ceramide inositolphosphotransferase
HORVU.MOREX.r2.5HG0419040	Phosphatidylinositol-4-phosphate 5-kinase family protein
HORVU.MOREX.r2.7HG0554970	Phosphoenolpyruvate carboxykinase (ATP)
HORVU.MOREX.r2.3HG0251110	Phosphoglucan, water dikinase, chloroplastic
HORVU.MOREX.r2.6HG0474240	Phosphoglycerate kinase
HORVU.MOREX.r2.2HG0083230	Phosphoglycerate mutase-like protein
HORVU.MOREX.r2.1HG0051620	Phospholipase A1
HORVU.MOREX.r2.6HG0497440	Phospholipase a1-chloroplastic-like
HORVU.MOREX.r2.5HG0396530	Phospholipase D
HORVU.MOREX.r2.4HG0303440	phospholipase D gamma 2
HORVU.MOREX.r2.7HG0561520	Phospholipid-transporting ATPase
HORVU.MOREX.r2.2HG0177520	Phosphomannomutase
HORVU.MOREX.r2.3HG0265230	Phosphonoacetaldehyde hydrolase
HORVU.MOREX.r2.3HG0201570	Phosphopantetheine adenylyltransferase
HORVU.MOREX.r2.2HG0099550	Phosphoserine phosphatase
HORVU.MOREX.r2.7HG0607740	Phosphosulfolactate synthase-related protein
HORVU.MOREX.r2.4HG0334170	Photosynthetic NDH subcomplex B 2
HORVU.MOREX.r2.4HG0347980	Photosystem I assembly protein Ycf3
HORVU.MOREX.r2.1HG0042850	Photosystem I P700 chlorophyll a apoprotein A1
HORVU.MOREX.r2.4HG0283370	Photosystem I reaction center subunit N
HORVU.MOREX.r2.2HG0093490	Photosystem I reaction center subunit N
HORVU.MOREX.r2.2HG0126480	Photosystem II 10 kDa polypeptide family protein
HORVU.MOREX.r2.2HG0126490	Photosystem II 10 kDa polypeptide family protein
HORVU.MOREX.r2.3HG0260030	Photosystem II 22 kDa, chloroplastic
HORVU.MOREX.r2.5HG0423880	Photosystem II protein
HORVU.MOREX.r2.4HG0315170	Photosystem II Psb27 protein
HORVU.MOREX.r2.1HG0047660	Photosystem II reaction center protein Z
HORVU.MOREX.r2.5HG0441160	Photosystem II reaction center Psb28 protein
HORVU.MOREX.r2.7HG0622110	Photosystem II stability/assembly factor HCF136
HORVU.MOREX.r2.4HG0289300	Phototropic-responsive NPH3 family protein
HORVU.MOREX.r2.1HG0032810	Phototropic-responsive NPH3 family protein
HORVU.MOREX.r2.3HG0182590	Phytanoyl-CoA dioxygenase domain-containing protein 1
HORVU.MOREX.r2.4HG0289540	Phytoalexin-deficient 4-1 protein
HORVU.MOREX.r2.4HG0281970	Phytochrome
HORVU.MOREX.r2.4HG0317680	Phytochrome
HORVU.MOREX.r2.5HG0424550	Phytochrome
HORVU.MOREX.r2.1HG0074050	phytochrome interacting factor 3-like 5
HORVU.MOREX.r2.4HG0339260	Phytochrome kinase substrate
HORVU.MOREX.r2.6HG0525610	Phytoene synthase
HORVU.MOREX.r2.4HG0292360	piezo-type mechanosensitive ion channel component
HORVU.MOREX.r2.5HG0352150	PI-PLC X domain-containing protein
HORVU.MOREX.r2.5HG0387690	PI-PLC X domain-containing protein
HORVU.MOREX.r2.5HG0406490	Pirin-like protein
HORVU.MOREX.r2.5HG0443540	Pirin-like protein
HORVU.MOREX.r2.7HG0546260	PLAC8 family protein
HORVU.MOREX.r2.1HG0075880	Plant basic secretory protein family protein, putative
HORVU.MOREX.r2.2HG0112400	Plant cadmium resistance protein
HORVU.MOREX.r2.5HG0359600	plant glycogenin-like starch initiation protein 1
HORVU.MOREX.r2.6HG0462000	Plant protein 1589 of unknown function
HORVU.MOREX.r2.5HG0378740	Plant/F1M20-13 protein
HORVU.MOREX.r2.3HG0200070	Plant/MSJ11-3 protein, putative
HORVU.MOREX.r2.3HG0274320	Plant-specific domain TIGR01615 family protein
HORVU.MOREX.r2.1HG0039120	Plastid lipid-associated protein
HORVU.MOREX.r2.7HG0556210	Plastid movement impaired protein
HORVU.MOREX.r2.4HG0280540	Plastid-lipid associated protein PAP / fibrillin family protein
HORVU.MOREX.r2.2HG0159980	Plastid-lipid associated protein PAP/fibrillin family-like
HORVU.MOREX.r2.6HG0473580	PLATZ transcription factor family protein
HORVU.MOREX.r2.3HG0251130	Pleckstrin homology domain-containing protein 1
HORVU.MOREX.r2.3HG0192790	P-loop containing nucleoside triphosphate hydrolases superfamily protein
HORVU.MOREX.r2.5HG0436240	P-loop containing nucleoside triphosphate hydrolases superfamily protein
HORVU.MOREX.r2.UnG0635980	P-loop containing nucleoside triphosphate hydrolases superfamily protein
HORVU.MOREX.r2.1HG0064250	p-loop containing nucleoside triphosphate hydrolases superfamily protein
HORVU.MOREX.r2.6HG0465920	p-loop containing nucleoside triphosphate hydrolases superfamily protein, putative
HORVU.MOREX.r2.1HG0042790	Pmr5/Cas1p GDSL/SGNH-like acyl-esterase family protein
HORVU.MOREX.r2.1HG0043720	Pollen Ole e 1 allergen and extensin family protein
HORVU.MOREX.r2.4HG0330820	Poly(A) RNA polymerase cid14
HORVU.MOREX.r2.4HG0276270	Poly(A) RNA polymerase GLD2-A
HORVU.MOREX.r2.5HG0358980	Poly(A)-specific ribonuclease PARN-like
HORVU.MOREX.r2.5HG0443080	Poly(ADP-ribose) glycohydrolase 1
HORVU.MOREX.r2.2HG0148660	Polyadenylate-binding protein
HORVU.MOREX.r2.7HG0575590	Polyadenylate-binding protein
HORVU.MOREX.r2.2HG0164510	Polyadenylate-binding protein-interacting protein 4
HORVU.MOREX.r2.6HG0489140	Polychome, UV-B-insensitive 4
HORVU.MOREX.r2.2HG0173590	Polycystic kidney disease protein 1-like 3
HORVU.MOREX.r2.1HG0019580	Polycystin-2
HORVU.MOREX.r2.5HG0437440	Polynucleotidyl transferase, ribonuclease H-like superfamily protein
HORVU.MOREX.r2.4HG0311510	Polynucleotidyl transferase, ribonuclease H-like superfamily protein
HORVU.MOREX.r2.6HG0459530	Polyubiquitin protein
HORVU.MOREX.r2.4HG0277550	Potassium channel
HORVU.MOREX.r2.5HG0389630	Potassium voltage-gated channel subfamily D member 1
HORVU.MOREX.r2.5HG0376200	Powdery mildew resistance protein PM3 variant
HORVU.MOREX.r2.1HG0074110	PP2A regulatory subunit TAP46
HORVU.MOREX.r2.1HG0032670	PPPDE thiol peptidase family protein, putative
HORVU.MOREX.r2.5HG0437860	PPR containing protein
HORVU.MOREX.r2.1HG0045530	PRA1 family protein
HORVU.MOREX.r2.2HG0162620	Prefoldin subunit 2
HORVU.MOREX.r2.4HG0289770	Pre-mRNA splicing factor, putative
HORVU.MOREX.r2.4HG0317760	Pre-mRNA splicing factor, putative
HORVU.MOREX.r2.1HG0036770	Pre-mRNA splicing factor-related
HORVU.MOREX.r2.3HG0261170	Pre-mRNA-splicing factor cwc22
HORVU.MOREX.r2.7HG0609020	Pre-mRNA-splicing factor CWC26
HORVU.MOREX.r2.4HG0277750	Pre-rRNA-processing protein TSR2
HORVU.MOREX.r2.3HG0213500	Presenilin
HORVU.MOREX.r2.7HG0619810	Processing peptidase
HORVU.MOREX.r2.2HG0118060	Profilin
HORVU.MOREX.r2.7HG0612230	Programmed cell death protein 4
HORVU.MOREX.r2.6HG0485900	Prohibitin
HORVU.MOREX.r2.1HG0044100	Proline dehydrogenase
HORVU.MOREX.r2.6HG0461780	Prolyl endopeptidase
HORVU.MOREX.r2.2HG0086340	Prostaglandin E synthase 2
HORVU.MOREX.r2.6HG0489670	Protease Do-like 9
HORVU.MOREX.r2.3HG0192780	Protease HtpX
HORVU.MOREX.r2.5HG0367290	Protease HtpX homolog
[truncated: 664 more rows]

## Sheet: Table S9 H3K4me3
Table S9. Genes associated with H3K4me3 in D2 (M0vsM2vsD2)
[truncated: 130 more rows]

[truncated: 6 more sheets: Table S10 GO enrichment D2 K9ac, Table S11 DEG_UP_(D2vsM2), Table S12 DEG_DOWN_(D2vsM2), Table S13 PP2Cs, Table S14 PP2Cs_Signal Tracks, Table S15 Primer sequences]
