# Supplementary material for: Drought Stress-Related Reprogramming of Gene Expression in Barley Leaves Involves Loading of ABA-Related Genes with Euchromatic Marks H3K4me3 and H3K9ac
Source: Preprints.org preprint supplement (doi:10.20944/preprints202307.1046.v1), 2023-07-17
Supplement: Supplementary file 2 [file Supplemental Figures.docx]

**Supplemental figures**


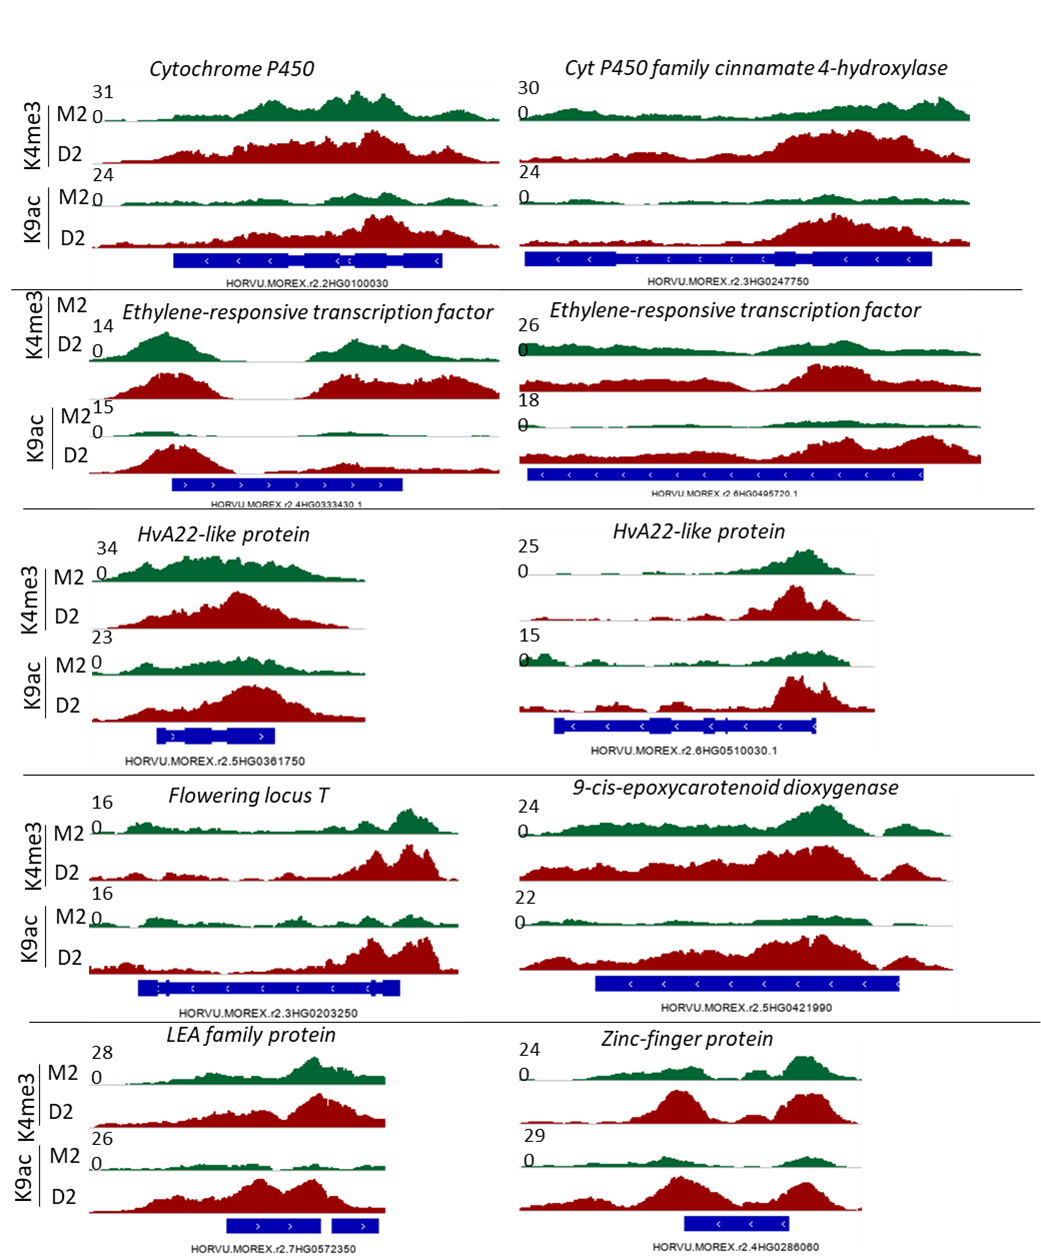


**Figure S1.** Signal tracks of histone enrichments for selected genes showing an increase in H3K9ac in D2 belonging to the GO term ‘response to abiotic stimulus’. First two tracks belonging to H3K4me3 and the two bottom tracks to H3K9ac. Green color presents the M2 sample and red the D2 samples.
